# Supplementary material for: Common Bottlenose Dolphin, Tursiops truncatus, Behavioral Response to a Record-Breaking Flood Event in Pensacola Bay, Florida
Source: MDPI journal article supplement (doi:10.3390/jzbg2030025), 2021-07-05
Supplement: s1 [file s1]

Archive with 3 entries (3 files):
- flood_data_all.csv
- jzbg-1199672 supplementary resubmitted.pdf
- McBride-Kebert & Toms - Supplemental Material 2.pdf
