# Supplementary material for: Common Bottlenose Dolphin, Tursiops truncatus, Behavioral Response to a Record-Breaking Flood Event in Pensacola Bay, Florida
Source: MDPI journal article supplement (doi:10.3390/jzbg2030025), 2021-07-05
Supplement: s1 [file s1 › flood_data_all.csv]

Index	Mark	Season	FloodPeriod	Cell	LineSeg_m	DolphinBest	CalfBest	NeoBest	Groups	km	Group_km	Point_X	Point_Y	DO	Salinity	Temp	Depth_m	Slope	LandDist_m	SAVDist_m	Slope_SD	DO_Bot	Sal_Bot	Temp_Bot	DO_Range	Sal_Range	Temp_Range	Nitro	Phos	Group_km.binomial	Expected_GD
1	Control Summer	Summer	Control	1	2362.99107	0	0	0	0	2.36299107	0	-87.39	30.31238712	6.3418498	24.00349998	31.30870056	3.92725992	0.41145301	0	0	0.20759191	5.732382417	19.82307529	28.89729977	-0.609467383	-4.180424686	-2.411400793	0.309552752	0.01799665	0	0.159746386
2	Control Summer	Summer	Control	2	2555.447502	0	0	0	0	2.5554475	0	-87.38	30.31241769	5.8736801	23.99180031	31.29109955	2.06492996	0.21934199	0	628.8088888	0.0879758	5.746044993	19.73850012	28.91104984	-0.127635107	-4.253300192	-2.380049707	0.310041256	0.018000525	0	0.406137237
3	Control Summer	Summer	Control	3	795.9358312	0	0	0	0	0.79593583	0	-87.37	30.31244743	5.88095	23.94739914	31.21279907	1.26757002	0.31511101	0	715.6540365	0.19651646	5.771087527	19.58342505	28.93624973	-0.109862473	-4.363974095	-2.276549337	0.310933508	0.01800755	0	0.080101257
4	Control Summer	Summer	Control	4	0	0	0	0	0	0	0	-87.36	30.31247635	5.8931298	26.92320061	28.45960045	1.44294	0.38867	0	881.2624882	0.2714456	5.801183383	19.39666748	28.96653303	-0.091946417	-7.52653313	0.506932575	0.311737753	0.01801355	0	0.024610405
5	Control Summer	Summer	Control	5	0	0	0	0	0	0	0	-87.32	30.31258374	6.0357599	30.24670029	27.24300003	2.71179008	0.239196	71.3099089	1680.319984	0.0869475	5.686304927	20.1080246	28.85109997	-0.349454973	-10.13867569	1.608099938	0.307890497	0.01798295	0	0.233990965
6	Control Summer	Summer	Control	6	0	0	0	0	0	0	0	-87.31	30.31260852	6.0205002	30.74550056	27.21789932	6.26768017	0.64785099	387.2164673	2075.198733	0.32307959	5.674139977	20.18347502	28.83887529	-0.346360223	-10.56202554	1.620975974	0.307461254	0.017979675	0	0.001146432
7	Control Summer	Summer	Control	7	1524.291165	0	0	0	0	1.52429117	0	-87.39	30.32141109	6.8020101	20.1053009	30.46100044	1.87248003	0.34741399	0	0	0.28843276	5.737154961	19.79354954	28.90209961	-1.064855139	-0.311751362	-1.558900831	0.363099754	0.019155125	0	0.036364724
8	Control Summer	Summer	Control	8	2538.919369	0	0	0	0	2.53891937	0	-87.38	30.32144167	6.7719402	23.98740005	31.28490067	3.87227988	0.41353601	0	0	0.23707631	5.753995061	19.6892252	28.91904974	-1.017945139	-4.298174853	-2.36585093	0.310325004	0.018002776	0	0.118644371
9	Control Summer	Summer	Control	9	3510.670655	0	0	0	0	3.51067066	0	-87.37	30.32147142	6.7461901	23.93289948	31.18359947	4.34451008	0.41251501	0	0	0.24626875	5.792889913	19.44826698	28.95813306	-0.953300187	-4.484632497	-2.225466408	0.343850754	0.01919785	0	0.076165386
10	Control Summer	Summer	Control	10	4156.545447	0	0	0	0	4.15654545	0	-87.36	30.32150035	6.7192001	23.94659996	30.99130058	4.37349987	0.46911499	0	0	0.23698677	5.838754892	19.16387558	29.00432491	-0.880445208	-4.78272438	-1.986975667	0.313325755	0.0180259	0	0.087668204
11	Control Summer	Summer	Control	11	8466.541757	12	3	0	1	8.46654176	0.118111979	-87.35	30.32152844	6.5134501	24.30690002	30.77330017	3.8233099	0.441605	0	0	0.22194101	5.875745058	18.93410015	29.04157543	-0.637705042	-5.372799869	-1.731724738	0.314612746	0.018035175	1	0.010113943
12	Control Summer	Summer	Control	12	4326.120411	0	0	0	0	4.32612041	0	-87.34	30.32155572	6.31354	24.50889969	30.43589973	3.98100996	0.29456499	0	265.7184429	0.20463254	5.879420042	18.91085005	29.04540014	-0.434119958	-5.598049642	-1.390499587	0.314720258	0.018035425	0	0.070506736
13	Control Summer	Summer	Control	13	1367.80813	0	0	0	0	1.36780813	0	-87.33	30.32158216	6.22931	25.78470039	29.05389977	1.82581997	0.27976599	0	574.5932767	0.22180753	5.81673491	19.29932547	28.98234987	-0.41257509	-6.485374924	-0.071549897	0.312492251	0.018018	0	0.049069107
14	Control Summer	Summer	Control	14	0	0	0	0	0	0	0	-87.32	30.32160778	6.3104701	29.36100006	27.55660057	1.26600003	0.25758299	0	738.5438228	0.2600931	5.678999901	20.15339947	28.84370041	-0.631470199	-9.207600593	1.287099839	0.308877505	0.01799075	0	0.05147408
15	Control Summer	Summer	Control	15	2388.10059	0	0	0	0	2.38810059	0	-87.31	30.32163257	6.25279	29.78249931	27.49150085	7.03439999	0.71491599	43.1288991	1330.331227	0.34533571	5.648622513	20.34229994	28.81307507	-0.604167487	-9.440199372	1.321574216	0.306584246	0.01797365	0	0.003199459
16	Control Summer	Summer	Control	16	359.6574352	0	0	0	0	0.35965744	0	-87.26	30.32172346	8.4715099	24.21360016	28.77289963	1.72212005	0.41062501	0	1984.310045	0.38183565	4.233700037	29.08640003	27.39410019	-4.237809863	4.872799872	-1.378799441	0.256485507	0.01757905	0	0.144686034
17	Control Summer	Summer	Control	17	3387.27424	0	0	0	0	3.38727424	0	-87.25	30.32174411	8.5800896	25.28030014	28.33569908	2.95777011	0.52338898	0	2128.130712	0.34760791	4.101082563	29.89389992	27.26337481	-4.479007037	4.613599778	-1.072324275	0.251885749	0.0175474	0	0.104000004
18	Control Summer	Summer	Control	18	5615.869392	4	1	0	1	5.61586939	0.178066819	-87.24	30.32176394	8.6365995	26.54100037	28.39279938	3.07013011	0.467623	0	2658.394483	0.23622992	4.035652518	30.29037476	27.19959974	-4.600946982	3.749374386	-1.193199637	0.250148498	0.017556775	1	0.119631596
19	Control Summer	Summer	Control	19	1495.347601	3	0	0	1	1.4953476	0.668740833	-87.23	30.32178294	8.6669703	27.29159927	29.17539978	1.02383006	0.27915999	0	3406.63795	0.19222157	4.878144979	25.09249973	28.04290009	-3.788825321	-2.199099537	-1.132499695	0.280097991	0.0177963	1	0.231048674
20	Control Summer	Summer	Control	20	0	0	0	0	0	0	0	-87.22	30.32180112	7.74015	29.17149925	29.02319908	1.19648004	0.31127799	0	3613.791833	0.19300014	4.863385022	25.16732502	28.0317502	-2.876764978	-4.00417423	-0.991448878	0.280168749	0.017837425	0	0.414828392
21	Control Summer	Summer	Control	21	0	0	0	0	0	0	0	-87.36	30.33052433	6.7161398	6.77968979	27.8010006	0.29150301	0.133452	0	0	0.19835756	5.843055	19.1372005	29.00865	-0.8730848	12.35751071	1.2076494	0.45586475	0.0244321	0	0.024615953
22	Control Summer	Summer	Control	22	415.9975395	0	0	0	0	0.41599754	0	-87.35	30.33055244	6.6898398	10.95769978	28.48080063	0.62367702	0.18551201	0	0	0.20910207	5.878245	18.9186	29.044101	-0.8115948	7.96090022	0.56330037	0.464176253	0.025431775	0	0.018669033
23	Control Summer	Summer	Control	23	3537.917297	12	3	2	1	3.5379173	0.282652169	-87.34	30.33057972	6.6690102	15.31779957	28.98240089	2.36686993	0.29811999	0	0	0.17507544	5.892374992	18.83040047	29.05844975	-0.776635208	3.512600897	0.076048855	0.315169998	0.018038625	1	0.041262355
24	Control Summer	Summer	Control	24	7044.936251	12	4	1	1	7.04493625	0.141945926	-87.33	30.33060617	6.6505799	11.3835001	28.31349945	1.89828002	0.25069201	0	0	0.15251146	5.876907468	18.92600012	29.04292536	-0.773672432	7.542500018	0.729425908	0.314608246	0.018033925	1	0.062036741
25	Control Summer	Summer	Control	25	6610.380942	0	0	0	0	6.61038094	0	-87.32	30.3306318	6.7906499	27.72439957	27.99160004	2.37869	0.30383599	0	51.8132137	0.29300402	5.704532623	19.99637508	28.86919975	-1.086117277	-7.728024486	0.877599713	0.308581002	0.017989625	0	0.031435405
26	Control Summer	Summer	Control	26	6465.75231	0	0	0	0	6.46575231	0	-87.31	30.3306566	6.9819498	26.53650093	28.41699982	6.76350021	0.63854301	0	1051.813214	0.33885969	5.567105055	20.85012484	28.73062515	-1.414844745	-5.686376094	0.313625333	0.30380775	0.017955274	0	0.025549811
27	Control Summer	Summer	Control	27	3016.037256	0	0	0	0	3.01603726	0	-87.3	30.33068057	7.5057201	23.82929993	29.42869949	4.4717598	0.550138	0	1093.998219	0.31635305	5.238034964	22.8937006	28.39890003	-2.267685136	-0.93559933	-1.029799458	0.292392999	0.01787305	0	0.11422206
28	Control Summer	Summer	Control	28	3072.193102	0	0	0	0	3.0721931	0	-87.29	30.33070372	8.0000095	22.41430092	29.86170006	5.85337019	0.55243599	0	1067.223322	0.35933739	4.79278326	25.65233358	27.95116679	-3.20722624	3.238032657	-1.910533271	0.276791662	0.0177552	0	0.081092343
29	Control Summer	Summer	Control	29	3133.495269	0	0	0	0	3.13349527	0	-87.28	30.33072603	8.27318	22.85840034	29.49850082	7.85520983	0.47607899	0	999.5609919	0.38735204	4.488339901	27.53102446	27.64625025	-3.784840099	4.672624116	-1.852250572	0.265937753	0.01766685	0	0.016088282
30	Control Summer	Summer	Control	30	2787.995813	0	0	0	0	2.78799581	0	-87.26	30.33074752	8.4585695	23.86630058	28.93659973	9.67980957	0.24850599	82.2812771	984.310045	0.25382192	4.257145047	28.9586997	27.41464996	-4.201424453	5.092399123	-1.521949767	0.257978492	0.01760975	0	0.017585508
31	Control Summer	Summer	Control	31	1414.405767	0	0	0	0	1.41440577	0	-87.25	30.33076819	8.5612001	24.88570023	28.53499985	10.20650005	0.157563	519.4370152	1249.127791	0.1712021	4.123484969	29.78657484	27.28052521	-4.437715131	4.900874611	-1.254474642	0.253918998	0.017597375	0	0.008801189
32	Control Summer	Summer	Control	32	1585.652383	0	0	0	0	1.58565238	0	-87.24	30.33078802	8.6158504	25.9197998	28.57889938	8.55840969	0.32359201	612.2119364	2024.460703	0.21614864	4.051154971	30.22550011	27.20997477	-4.564695429	4.305700307	-1.368924614	0.252047248	0.0176077	0	0.004213241
33	Control Summer	Summer	Control	33	4942.505246	0	0	0	0	4.94250525	0	-87.23	30.33080703	8.6384401	26.48500061	29.19109917	5.20046997	0.34606701	387.4454114	2938.802824	0.13098566	4.014632463	30.43499994	27.17700005	-4.623807637	3.949999333	-2.014099124	0.251606748	0.017644725	0	0.146732262
34	Control Summer	Summer	Control	34	6279.193563	6	1	0	1	6.27919356	0.15925612	-87.22	30.33082521	8.6358995	26.06279945	29.87890053	4.58469009	0.208259	391.4683944	2863.417288	0.12763769	3.997574985	30.51745033	27.16512442	-4.638324515	4.454650883	-2.713776114	0.251928002	0.0177078	1	0.055584093
35	Control Summer	Summer	Control	35	7073.314267	0	0	0	0	7.07331427	0	-87.21	30.33084256	8.6117897	24.75860023	29.74950027	4.53349018	0.14836399	387.3421798	2213.586581	0.09229607	3.982847512	30.5704999	27.15812445	-4.628942188	5.811899667	-2.591375823	0.251705498	0.0177611	0	0.212520338
36	Control Summer	Summer	Control	36	3313.64643	0	0	0	0	3.31364643	0	-87.2	30.33085909	8.5681601	22.90390015	29.06640053	3.11783004	0.25192001	98.5759124	1444.458044	0.1321533	3.967552483	30.61705017	27.15227556	-4.600607617	7.713150021	-1.914124968	0.252095498	0.01781625	0	0.265736153
37	Control Summer	Summer	Control	37	3038.389151	0	0	0	0	3.03838915	0	-87.19	30.33087478	8.4845505	21.57839966	28.62059975	3.23701	0.29668701	21.4385594	848.9830331	0.17920591	3.948682547	30.68012476	27.14387512	-4.535867953	9.1017251	-1.476724628	0.252704501	0.017884	0	0.098816834
38	Control Summer	Summer	Control	38	3879.642684	0	0	0	0	3.87964268	0	-87.18	30.33088966	8.34167	22.45479965	29.27770042	3.57464004	0.332169	0	804.904145	0.1556096	3.926155031	30.78347492	27.12882471	-4.415514969	8.328675272	-2.148875709	0.248336747	0.017992875	0	0.072219814
39	Control Summer	Summer	Control	39	3079.967086	18	3	0	1	3.07996709	0.324678794	-87.17	30.3309037	8.1654501	24.80739975	30.61050034	2.02560997	0.335612	0	1026.019936	0.17883003	3.916042566	30.83874989	27.12114954	-4.249407534	6.031350136	-3.4893508	0.239559751	0.018101575	1	0.027541716
40	Control Summer	Summer	Control	40	165.2492054	0	0	0	0	0.16524921	0	-87.16	30.33091691	7.9917402	24.93740082	30.64780045	0.74281502	0.215003	0	1097.212413	0.17724484	3.965116739	30.55080032	27.16819954	-4.026623461	5.613399503	-3.479600911	0.260435333	0.018057366	0	0.196350688
41	Control Summer	Summer	Control	41	0	0	0	0	0	0	0	-87.15	30.3309293	6.3043199	31.2928009	27.8791008	0.99236202	0.22970299	0	581.1805586	0.3104739	3.974550009	30.51810074	27.17440033	-2.329769891	-0.774700161	-0.70470047	0.255661011	0.0181455	0	0.042016033
42	Control Summer	Summer	Control	42	0	0	0	0	0	0	0	-87.14	30.33094086	5.8845901	33.73329926	27.30830002	2.28427005	0.475155	0	114.7802189	0.42436563	5.744994879	19.74500084	28.90999985	-0.139595221	-13.98829842	1.601699827	0.31001401	0.0180007	0	0.000619719
43	Control Summer	Summer	Control	43	374.5273985	0	0	0	0	0.3745274	0	-87.32	30.33965581	6.71662	10.63339996	27.84399986	0.44852901	0.107537	0	163.361177	0.11944818	5.591199875	20.70179939	28.75469971	-1.125420125	10.06839943	0.910699847	0.431000501	0.024563225	0	0.269565495
44	Control Summer	Summer	Control	44	3529.744551	3	1	0	1	3.52974455	0.283306621	-87.31	30.33968062	7.22083	25.16040039	28.83399963	3.66997004	0.46408001	0	1067.612772	0.25462212	5.459442496	21.52252483	28.62147522	-1.761387504	-3.637875556	-0.21252441	0.300212003	0.01793375	1	0.027950557
45	Control Summer	Summer	Control	45	3050.608596	0	0	0	0	3.0506086	0	-87.3	30.3397046	7.61376	22.9829998	29.7269001	6.23085022	0.49154899	0	249.7708161	0.30319196	5.191315055	23.19112492	28.35060024	-2.422444945	0.208125116	-1.376299857	0.291069254	0.017872625	0	0.133998286
46	Control Summer	Summer	Control	46	3024.422528	0	0	0	0	3.02442253	0	-87.29	30.33972775	7.9904199	21.74449921	30.14570045	6.53758001	0.378319	27.1016838	67.2233217	0.19720649	4.841374993	25.36637545	27.99747515	-3.149044907	3.621876236	-2.148225303	0.279117256	0.0177915	0	0.533542799
47	Control Summer	Summer	Control	47	3064.333698	0	0	0	0	3.0643337	0	-87.28	30.33975008	8.2684002	22.13319969	29.77090073	7.07561016	0.39751899	37.6377862	0	0.24766935	4.520644903	27.35987473	27.67387533	-3.747755297	5.226675035	-2.097025398	0.268312	0.0177218	0	0.157245405
48	Control Summer	Summer	Control	48	3258.656471	0	0	0	0	3.25865647	0	-87.27	30.33977158	8.4479399	23.17510033	29.1595993	9.83423996	0.22498301	0	0	0.30259019	4.286285043	28.82429934	27.43622446	-4.161654857	5.649199005	-1.723374839	0.261016503	0.017692075	0	0.007617692
49	Control Summer	Summer	Control	49	1833.556141	0	0	0	0	1.83355614	0	-87.25	30.33979225	8.5381699	24.0904007	28.79680061	10.49300003	0.032992	472.8413156	765.7855903	0.01367211	4.162675023	29.61092472	27.30874968	-4.375494877	5.520524021	-1.488050934	0.258285247	0.0177173	0	0.155052192
50	Control Summer	Summer	Control	50	2414.677299	0	0	0	0	2.4146773	0	-87.24	30.33981209	8.57728	24.8281002	28.81620026	10.02750015	0.0719591	1404.712573	1765.773588	0.02661621	4.095010042	30.02320004	27.24259996	-4.482269958	5.195099835	-1.573600296	0.256772757	0.0177334	0	0.011088545
51	Control Summer	Summer	Control	51	0	0	0	0	0	0	0	-87.23	30.3398311	8.58881	25.28700066	29.18079948	8.50506973	0.152449	1387.445411	2765.770264	0.0885842	4.055629969	30.2437501	27.20805025	-4.533180031	4.956749435	-1.972749229	0.256012745	0.017757025	0	0.006034351
52	Control Summer	Summer	Control	52	714.1672804	0	0	0	0	0.71416728	0	-87.22	30.33984929	8.5826397	25.32439995	29.55940056	7.17181015	0.13214301	1390.984308	2111.907013	0.02000713	4.04234004	30.30545044	27.19967461	-4.54029966	4.981050489	-2.359725954	0.256663494	0.01782125	0	0.036794768
53	Control Summer	Summer	Control	53	2061.267691	0	0	0	0	2.06126769	0	-87.21	30.33986665	8.5626097	24.93720055	29.50469971	5.51999998	0.0810743	1306.318962	1450.164871	0.04396255	4.02799499	30.35452509	27.19350004	-4.53461471	5.417324539	-2.311199668	0.256660245	0.01787255	0	0.063060041
54	Control Summer	Summer	Control	54	0	0	0	0	0	0	0	-87.2	30.33988318	8.5233698	24.03160095	29.14069939	5.29693985	0.0645982	1007.868938	807.9671504	0.04138027	4.010222554	30.41265011	27.18587446	-4.513147246	6.381049158	-1.954824928	0.2567975	0.01791485	0	0.088412847
55	Control Summer	Summer	Control	55	3358.067833	0	0	0	0	3.35806783	0	-87.19	30.33989888	8.4416599	23.16250038	29.02479935	5.46057987	0.15700901	205.523387	39.7791991	0.1151687	3.986715019	30.50332546	27.1729002	-4.454944881	7.340825082	-1.85189915	0.254882753	0.017968	0	0.053784821
56	Control Summer	Summer	Control	56	5621.983548	0	0	0	0	5.62198355	0	-87.18	30.33991376	8.2758198	23.70420074	29.68939972	4.7639699	0.264613	0	0	0.20904099	3.93967253	30.74039984	27.13617468	-4.33614727	7.036199097	-2.553225041	0.239644248	0.018081225	0	0.006903397
57	Control Summer	Summer	Control	57	1411.292748	0	0	0	0	1.41129275	0	-87.17	30.33992781	8.0484104	24.55949974	30.34980011	5.2147398	0.156427	549.424919	387.5256715	0.09338606	3.918039978	30.84989977	27.11974955	-4.130370422	6.290400029	-3.230050564	0.231191002	0.01817305	0	0.010245516
58	Control Summer	Summer	Control	58	4388.056791	0	0	0	0	4.38805679	0	-87.16	30.33994103	7.7579498	23.85910034	30.02560043	4.71602011	0.35313299	0	471.9631903	0.24013064	4.073539972	29.90652466	27.27245045	-3.684409828	6.047424318	-2.753149983	0.315690503	0.01785925	0	0.003090574
59	Control Summer	Summer	Control	59	1453.340686	0	0	0	0	1.45334069	0	-87.15	30.33995342	7.36902	22.63929939	29.44949913	1.62383997	0.295454	0	0	0.26447081	4.438705027	27.69460011	27.62927485	-2.930314973	5.055300715	-1.820224285	0.511486508	0.01704595	0	0.031517271
60	Control Summer	Summer	Control	60	0	0	0	0	0	0	0	-87.14	30.33996499	7.09413	21.94630051	29.15209961	2.23924994	0.27539501	0	0	0.13698444	5.680782557	20.13602495	28.84699965	-1.413347443	-1.810275558	-0.305099965	1.124167502	0.0140951	0	1.89E-06
61	Control Summer	Summer	Control	61	0	0	0	0	0	0	0	-87.29	30.34875178	6.60322	4.76940012	27.66710091	0.91589397	0.21376801	0	0	0.25419389	4.840945	25.373751	27.99625	-1.762275	20.60435088	0.32914909	0.46878425	0.02657265	0	0.042612051
62	Control Summer	Summer	Control	62	0	0	0	0	0	0	0	-87.27	30.34879562	7.5420299	13.60000038	28.39139938	2.99134994	0.55242401	0	0	0.41311728	4.253709793	29.0923996	27.39249992	-3.288320107	15.49239922	-0.998899456	0.414008498	0.024145175	0	0.002010232
63	Control Summer	Summer	Control	63	1468.193401	0	0	0	0	1.4681934	0	-87.25	30.34881629	8.5100002	22.77669907	29.0345993	9.03748035	0.27575099	31.3098825	765.7643962	0.35175969	4.221322656	29.3602252	27.3493247	-4.288677544	6.583526131	-1.685274597	0.265630998	0.017932175	0	0.001714869
64	Control Summer	Summer	Control	64	0	0	0	0	0	0	0	-87.24	30.34883614	8.5258799	23.23480034	29.05450058	9.4377203	0.0486808	1002.663633	1765.764396	0.01729509	4.180298042	29.62187958	27.30811996	-4.345581858	6.387079238	-1.746380615	0.266116601	0.01799208	0	0.058894422
65	Control Summer	Summer	Control	65	823.7345745	0	0	0	0	0.82373457	0	-87.23	30.34885516	8.5236702	23.68309975	29.23819923	9.24932003	0.0215762	1999.626595	2419.825469	0.01444995	4.134307623	29.86484957	27.27007484	-4.389362577	6.181749817	-1.968124386	0.26430025	0.01797565	0	0.006423946
66	Control Summer	Summer	Control	66	2074.430115	0	0	0	0	2.07443012	0	-87.22	30.34887336	8.51159	24.26409912	29.40690041	8.17383957	0.145666	1555.08843	1505.597421	0.04486714	4.124729991	29.90637493	27.26539993	-4.386860009	5.642275811	-2.141500477	0.265593253	0.0180496	0	0.01216106
67	Control Summer	Summer	Control	67	0	0	0	0	0	0	0	-87.21	30.34889072	8.4972095	25.13949966	29.35659981	5.73124981	0.105332	850.8121228	697.9688771	0.04652367	4.108624935	29.96437502	27.25812483	-4.388584565	4.824875359	-2.098474982	0.265688501	0.01809495	0	0.107068488
68	Control Summer	Summer	Control	68	2566.262117	0	0	0	0	2.56626212	0	-87.2	30.34890726	8.4770403	25.33670044	29.17709923	4.68134022	0.117614	236.9802893	69.8504144	0.07057321	4.081194997	30.07309961	27.24215031	-4.395845303	4.736399173	-1.934948923	0.264454998	0.018105325	0	0.234521941
69	Control Summer	Summer	Control	69	4390.326225	0	0	0	0	4.39032623	0	-87.19	30.34892297	7.9228001	18.73500061	28.75970078	2.36034989	0.303247	0	0	0.14047472	4.042505026	30.24310017	27.21577549	-3.880295074	11.50809956	-1.54392529	0.260081507	0.0181014	0	0.158880642
70	Control Summer	Summer	Control	70	790.1772602	0	0	0	0	0.79017726	0	-87.18	30.34893785	6.8306899	7.3118	28.17700005	0.933245	0.204393	0	0	0.18583596	3.954020023	30.68420029	27.14550018	-2.876669877	23.37240029	-1.031499867	0.380249236	0.029341599	0	0.003807519
71	Control Summer	Summer	Control	71	2455.088456	0	0	0	0	2.45508846	0	-87.17	30.3489519	7.5360799	18.36949921	29.36050034	2.33428001	0.25140801	0	0	0.18219603	3.929565072	30.79564953	27.1286993	-3.606514828	12.42615032	-2.231801037	0.377882734	0.029370975	0	0.012219477
72	Control Summer	Summer	Control	72	3734.027855	0	0	0	0	3.73402785	0	-87.16	30.34896513	7.6363902	23.23990059	29.67749977	3.26356006	0.29420799	0	0	0.15070145	4.364266109	28.14945984	27.55578041	-3.272124091	4.909559249	-2.121719359	0.474529803	0.01721322	0	0.086433041
73	Control Summer	Summer	Control	73	594.5576174	0	0	0	0	0.59455762	0	-87.15	30.34897753	7.31287	22.40600014	29.3281002	5.25614023	0.28127399	0	0	0.21836836	5.160537481	23.3031249	28.3368001	-2.152332519	0.897124765	-0.991300102	0.908527494	0.015334425	0	0.000351877
74	Control Summer	Summer	Control	74	0	0	0	0	0	0	0	-87.25	30.35784033	8.4693804	20.85400009	29.2696991	6.11084986	0.518722	0	1237.755381	0.39307189	4.295044041	29.0516201	27.40067978	-4.174336359	8.197620012	-1.869019321	0.276283997	0.01826552	0	0.004661755
75	Control Summer	Summer	Control	75	612.7145602	0	0	0	0	0.61271456	0	-87.24	30.35786018	8.4640598	21.18110085	29.28100014	9.36497974	0.0504727	996.5860798	2026.465313	0.02768006	4.287289937	29.11693319	27.39249992	-4.176769863	7.935832337	-1.888500216	0.279290994	0.018385099	0	0.09271457
76	Control Summer	Summer	Control	76	2092.97171	0	0	0	0	2.09297171	0	-87.23	30.35787921	8.4451704	21.39369965	29.36569977	9.17844009	0.0368564	1996.58608	2288.841493	0.0195388	4.242117405	29.33795023	27.35822487	-4.203052995	7.94425058	-2.007474901	0.276951499	0.018338775	0	0.012911827
77	Control Summer	Summer	Control	77	0	0	0	0	0	0	0	-87.22	30.35789741	8.4193802	22.02350044	29.41699982	8.53888988	0.142259	1333.664525	1288.841493	0.09778417	4.24010253	29.33427525	27.36227465	-4.17927767	7.310774806	-2.054725173	0.279811509	0.01845505	0	0.00971589
78	Control Summer	Summer	Control	78	4701.47239	0	0	0	0	4.70147239	0	-87.21	30.35791478	8.4018002	23.64459991	29.32769966	5.36478996	0.242119	333.6645247	288.8414933	0.17600498	4.215312004	29.43062019	27.34962006	-4.186488196	5.786020283	-1.978079604	0.279774994	0.01850196	0	0.029030785
79	Control Summer	Summer	Control	79	4658.869174	25	4	1	1	4.65886917	0.214644362	-87.2	30.35793133	7.9078898	19.46990013	28.80520058	1.91656995	0.26982799	0	0	0.16121752	4.16079998	29.67736689	27.31026649	-3.74708982	10.20746676	-1.494934085	0.336698741	0.02395465	1	0.048161469
80	Control Summer	Summer	Control	80	31.30904831	0	0	0	0	0.03130905	0	-87.33	30.36670211	6.5753698	4.34856987	27.65119934	0.86854398	0.0206751	0	3083.799941	0.01994432	4.422719955	28.45429993	27.50049973	-2.152649845	24.10573006	-0.150699615	0.494861491	0.032528675	0	0.064081361
81	Control Summer	Summer	Control	81	2623.350447	2	0	0	1	2.62335045	0.381191922	-87.32	30.36672777	6.59059	8.54862022	28.59020042	1.05185997	0.115881	0	2946.15342	0.0625525	4.422719955	28.45429993	27.50049973	-2.167870045	19.90567971	-1.089700695	0.486581743	0.030345549	1	0.044590317
82	Control Summer	Summer	Control	82	160.3409813	0	0	0	0	0.16034098	0	-87.31	30.3667526	6.6167798	5.01121998	27.68330002	0.81291199	0.0772929	0	2264.937158	0.07142342	4.42272	28.4543	27.5005	-2.1940598	23.44308002	-0.18280002	0.472098492	0.02680615	0	0.217257067
83	Control Summer	Summer	Control	83	674.7987411	0	0	0	0	0.67479874	0	-87.3	30.36677661	6.6082101	4.85867023	27.67309952	0.99013501	0.100058	0	1880.16818	0.07914203	4.422719955	28.45429993	27.50049973	-2.185490145	23.5956297	-0.172599795	0.469742239	0.026641925	0	0.209753252
84	Control Summer	Summer	Control	84	263.8519236	0	0	0	0	0.26385192	0	-87.29	30.36679979	6.6016402	4.74170017	27.66530037	1.08265996	0.0975967	0	1798.377091	0.06996977	4.422719955	28.45429993	27.50049973	-2.178920245	23.71259976	-0.164800645	0.501950011	0.034482825	0	0.032087086
85	Control Summer	Summer	Control	85	0	0	0	0	0	0	0	-87.28	30.36682214	6.5981698	4.68017006	27.66130066	0.96313298	0.0902669	0	1810.318774	0.06421501	4.422719955	28.45429993	27.50049973	-2.175449845	23.77412987	-0.160800935	0.49946101	0.034307925	0	0.034535192
86	Control Summer	Summer	Control	86	0	0	0	0	0	0	0	-87.27	30.36684366	7.50911	11.74300003	28.57909966	0.89792103	0.190047	0	1903.268885	0.17939982	4.394493262	28.58386676	27.47819964	-3.114616738	16.84086673	-1.100900019	0.372681744	0.022249425	0	0.244899132
87	Control Summer	Summer	Control	87	593.302635	0	0	0	0	0.59330263	0	-87.25	30.36686435	8.4175501	19.03910065	29.48069954	7.55197001	0.50375301	375.144934	2103.521453	0.36965686	4.385470033	28.63497496	27.47097492	-4.032080067	9.595874307	-2.009724618	0.288015753	0.018641725	0	0.005148607
88	Control Summer	Summer	Control	88	2381.348193	0	0	0	0	2.38134819	0	-87.24	30.36688421	8.3969202	19.15559959	29.4720993	9.98009968	0.0564369	1335.992265	2649.584002	0.02380448	4.373447537	28.69852543	27.46322489	-4.023472663	9.542925839	-2.008874412	0.289636247	0.0187116	0	0.079953165
89	Control Summer	Summer	Control	89	0	0	0	0	0	0	0	-87.23	30.36690325	8.3593798	18.87960052	29.52260017	9.00858021	0.0905134	2185.874537	2298.548978	0.03436971	4.361829877	28.74637461	27.45919991	-3.997549923	9.866774087	-2.063400265	0.291895494	0.018805725	0	0.018605307
90	Control Summer	Summer	Control	90	3755.556219	5	1	0	1	3.75555622	0.266272142	-87.22	30.36692146	8.3082895	18.90640068	29.53980064	9.06392002	0.0896633	1348.61061	1306.003223	0.04678087	4.376722574	28.64942551	27.48092508	-3.931566926	9.743024827	-2.058875557	0.297968499	0.0190353	1	0.010044056
91	Control Summer	Summer	Control	91	3213.281787	0	0	0	0	3.21328179	0	-87.21	30.36693883	8.2433796	19.80900002	29.40859985	5.8984499	0.404302	385.4044856	357.7169708	0.15477805	4.403187513	28.48362494	27.51545	-3.840192087	8.674624915	-1.893149849	0.306425504	0.019374875	0	0.050364087
92	Control Summer	Summer	Control	92	2048.889551	0	0	0	0	2.04888955	0	-87.2	30.36695538	8.13274	19.74329948	29.24559975	3.77089	0.28004	154.3403358	205.9447629	0.2050781	4.462515116	28.14597464	27.58039951	-3.670224884	8.402675156	-1.665200237	0.320168249	0.0200038	0	0.045622775
93	Control Summer	Summer	Control	93	3389.825772	0	0	0	0	3.38982577	0	-87.19	30.3669711	7.9447098	19.02939987	29.12870026	2.66581988	0.36184201	0	527.6236353	0.16648869	4.526679993	27.78460058	27.64876684	-3.418029807	8.755200706	-1.479933424	0.335492753	0.020966	0	0.134136737
94	Control Summer	Summer	Control	94	0	0	0	0	0	0	0	-87.16	30.36701329	6.4839501	11.93389988	29.74869919	0.19165701	0.105454	0	624.7418179	0.17471668	4.900680065	25.63000011	28.00500011	-1.583270035	13.69610023	-1.743699076	0.406676486	0.031543	0	0.046230678
95	Control Summer	Summer	Control	95	0	0	0	0	0	0	0	-87.15	30.3670257	6.4049501	11.78660011	29.78120041	0.30368099	0.13157099	0	398.823253	0.19204184	5.085380077	24.64730072	28.14865017	-1.319570023	12.86070061	-1.632550241	0.40193399	0.031640525	0	0.033842155
96	Control Summer	Summer	Control	96	243.0077649	0	0	0	0	0.24300776	0	-87.32	30.37575173	6.4939299	3.0197401	27.58189964	0.75352299	0.0556375	0	3664.189416	0.06180387	4.422719955	28.45429993	27.50049973	-2.071209945	25.43455983	-0.081399915	0.547817245	0.045134699	0	0.000328786
97	Control Summer	Summer	Control	97	4064.72584	0	0	0	0	4.06472584	0	-87.31	30.37577657	6.4771099	2.76188993	27.57110023	1.20141006	0.0919308	0	3138.991472	0.07121114	4.422719955	28.45429993	27.50049973	-2.054389945	25.69241	-0.070600505	0.579293996	0.052348301	0	3.36E-05
98	Control Summer	Summer	Control	98	3937.293224	0	0	0	0	3.93729322	0	-87.3	30.37580059	6.4672298	2.61869001	27.56669998	1.31308997	0.0897895	0	2871.587036	0.06214289	4.422719955	28.45429993	27.50049973	-2.044509845	25.83560992	-0.066200255	0.596473008	0.056292899	0	1.22E-05
99	Control Summer	Summer	Control	99	3836.510546	0	0	0	0	3.83651055	0	-87.29	30.37582378	6.4616399	2.54474998	27.56599998	1.07389998	0.100986	0	2798.377091	0.06541904	4.422719955	28.45429993	27.50049973	-2.038919945	25.90954995	-0.065500255	0.602727503	0.057738325	0	8.09E-06
100	Control Summer	Summer	Control	100	7058.400079	0	0	0	0	7.05840008	0	-87.28	30.37584613	6.9264598	6.23207998	28.08200073	1.31826997	0.104123	0	2806.06633	0.05541649	4.422719955	28.45429993	27.50049973	-2.503739845	22.22221995	-0.581501005	0.667331487	0.073141947	0	3.12E-06
101	Control Summer	Summer	Control	101	3533.453304	0	0	0	0	3.5334533	0	-87.27	30.37586766	8.3827801	17.91790009	29.60709953	0.99167198	0.212115	0	2888.183941	0.22827815	4.432317495	28.40960026	27.50847435	-3.950462605	10.49170017	-2.09862518	0.292920999	0.018803775	0	0.492966662
102	Control Summer	Summer	Control	102	7057.742769	5	1	0	1	7.05774277	0.14168836	-87.25	30.37588836	8.3675098	17.90320015	29.60009956	6.36979008	0.41574299	356.8027146	3052.468938	0.21762205	4.448577523	28.33295012	27.52312517	-3.918932277	10.42974997	-2.076974388	0.296326503	0.01892885	1	0.033494163
103	Control Summer	Summer	Control	103	425.6649489	0	0	0	0	0.42566495	0	-87.24	30.37590823	8.33218	17.93020058	29.5795002	8.78122997	0.122878	1137.848246	3451.530023	0.03071425	4.455357432	28.29645014	27.53244972	-3.876822568	10.36624956	-2.047050478	0.299711749	0.01906035	0	0.173289936
104	Control Summer	Summer	Control	104	1837.994722	0	0	0	0	1.83799472	0	-87.23	30.37592727	8.2760401	17.66290092	29.61490059	7.86616993	0.124507	1653.883537	2589.474781	0.02740615	4.460582495	28.25709963	27.54379988	-3.815457605	10.59419871	-2.071100713	0.303921752	0.019234425	0	0.086455365
105	Control Summer	Summer	Control	105	3037.459066	0	0	0	0	3.03745907	0	-87.22	30.37594549	8.2020102	17.67280006	29.65469933	8.33218002	0.134214	1788.693033	1768.529518	0.04328187	4.482317448	28.12559986	27.57262516	-3.719692752	10.4527998	-2.08207417	0.310874999	0.01954405	0	0.041051505
106	Control Summer	Summer	Control	106	0	0	0	0	0	0	0	-87.21	30.37596287	8.1141596	18.42959976	29.62179947	8.43784046	0.174702	1236.578037	1244.99545	0.12389625	4.50686264	27.97300005	27.60570002	-3.60729696	9.54340029	-2.016099454	0.318168752	0.019929125	0	0.015345313
107	Control Summer	Summer	Control	107	3770.331675	0	0	0	0	3.77033168	0	-87.2	30.37597943	7.9963498	19.09630013	29.57489967	6.08607006	0.18650199	975.2847402	1205.944763	0.05750299	4.535354972	27.79282475	27.64329958	-3.460994828	8.696524615	-1.93160009	0.324330747	0.020415675	0	0.085661751
108	Control Summer	Summer	Control	108	2266.387415	0	0	0	0	2.26638741	0	-87.19	30.37599515	7.7929502	19.45100021	29.59059906	3.90796995	0.41928601	278.8129741	1328.304518	0.26016203	4.57080245	27.55932474	27.68842506	-3.22214775	8.108324531	-1.902173996	0.32598675	0.021034575	0	0.010770329
109	Control Summer	Summer	Control	109	1848.171821	0	0	0	0	1.84817182	0	-87.18	30.37601005	7.39397	20.20459938	30.06340027	3.91371012	0.390156	0	1940.680957	0.18811309	4.62490499	27.19815016	27.7512002	-2.76906501	6.993550778	-2.312200071	0.317447752	0.021695825	0	0.041856574
110	Control Summer	Summer	Control	110	4293.790838	0	0	0	0	4.29379084	0	-87.17	30.37602412	6.8515401	21.62669945	31.26429939	4.75841999	0.341748	0	1970.015288	0.239436	4.725967526	26.57905006	27.85112476	-2.125572574	4.952350614	-3.413174627	0.300974004	0.022228225	0	0.008308292
111	Control Summer	Summer	Control	111	2052.468366	0	0	0	0	2.05246837	0	-87.16	30.37603736	6.5578499	21.86879921	31.78980064	5.04576015	0.255243	433.92602	1613.093294	0.2312706	4.890859962	25.65100002	27.99259996	-1.666989938	3.782200813	-3.797200676	0.2870785	0.02257725	0	0.004925536
112	Control Summer	Summer	Control	112	4662.013411	0	0	0	0	4.66201341	0	-87.15	30.37604977	6.3644199	21.55179977	31.90679932	4.83056021	0.24284101	299.7904432	1382.493484	0.20465906	5.140152574	24.32575035	28.18522501	-1.224267326	2.773950581	-3.72157431	0.276526995	0.0227848	0	0.012456839
113	Control Summer	Summer	Control	113	1229.619463	0	0	0	0	1.22961946	0	-87.14	30.37606135	6.3292398	11.46809959	29.74729919	1.54275	0.25833201	0	1089.48408	0.20659222	5.284214973	23.6022501	28.29384995	-1.045024827	12.13415051	-1.453449245	0.398192987	0.031695425	0	0.021774637
114	Control Summer	Summer	Control	114	3392.816528	0	0	0	0	3.39281653	0	-87.29	30.38484775	6.4456902	2.37108994	27.57290077	1.04962003	0.0534109	0	3798.377091	0.02266127	4.42272	28.4543	27.5005	-2.0229702	26.08321006	-0.07240077	0.63705501	0.065905575	0	4.59E-07
115	Control Summer	Summer	Control	115	269.4265532	0	0	0	0	0.26942655	0	-87.28	30.38487012	6.4365702	2.27889991	27.57830048	0.75114501	0.0406745	0	3804.045535	0.04501111	4.42272	28.4543	27.5005	-2.0138502	26.17540009	-0.07780048	0.666855991	0.073067775	0	3.96E-08
116	Control Summer	Summer	Control	116	1950.582296	0	0	0	0	1.9505823	0	-87.25	30.38491236	8.3247004	17.60790062	29.61030006	1.83467996	0.336326	0	4026.205501	0.24621894	4.481677413	28.16992569	27.55255032	-3.843022987	10.56202507	-2.057749744	0.395207256	0.033177199	0	0.158845711
117	Control Summer	Summer	Control	117	5600.674572	0	0	0	0	5.60067457	0	-87.24	30.38493224	8.2748604	17.58160019	29.60009956	5.32797003	0.371622	309.9535521	3962.967937	0.16410884	4.510633945	28.0199398	27.58227997	-3.764226455	10.43833961	-2.017819592	0.307423204	0.01937112	0	0.235356836
118	Control Summer	Summer	Control	118	2889.306493	0	0	0	0	2.88930649	0	-87.23	30.38495128	8.1992397	17.54840088	29.64410019	5.34924984	0.264568	802.7753751	3182.362626	0.1410237	4.523282528	27.94492483	27.59952545	-3.675957172	10.39652395	-2.044574738	0.311760999	0.019574225	0	0.10413112
119	Control Summer	Summer	Control	119	0	0	0	0	0	0	0	-87.22	30.3849695	8.0974598	17.76309967	29.75930023	7.25179005	0.166981	1069.868091	2559.24772	0.02873286	4.546057582	27.81497478	27.62817526	-3.551402218	10.05187511	-2.131124971	0.3175935	0.01993195	0	0.152062051
120	Control Summer	Summer	Control	120	3509.779533	0	0	0	0	3.50977953	0	-87.21	30.38498689	7.9752798	18.42670059	29.89500046	9.03287029	0.0685422	1134.813403	2229.812976	0.05243063	4.566287398	27.70032501	27.65382481	-3.408992402	9.273624422	-2.241175654	0.321615748	0.020344425	0	0.045398245
121	Control Summer	Summer	Control	121	752.8036113	0	0	0	0	0.75280361	0	-87.2	30.38500346	7.8189702	19.25130081	30.02739906	8.36120033	0.11291	1332.939414	2195.213515	0.03054101	4.583752394	27.59374952	27.67672491	-3.235217806	8.342448713	-2.350674149	0.322478503	0.020792625	0	0.032568979
122	Control Summer	Summer	Control	122	50.41039886	0	0	0	0	0.0504104	0	-87.19	30.38501919	7.5797801	20.01239967	30.16010094	7.72440004	0.0826532	1137.951263	2259.875131	0.02339897	4.603615046	27.44759989	27.70350027	-2.976165054	7.435200218	-2.456600669	0.318259001	0.0212849	0	0.031211019
123	Control Summer	Summer	Control	123	4147.422153	8	1	0	1	4.14742215	0.241113628	-87.18	30.38503409	7.21766	20.76609993	30.43840027	7.5318799	0.0428986	671.3729973	2679.642643	0.01789157	4.63231504	27.20977497	27.74240017	-2.58534496	6.443675041	-2.696000101	0.308367498	0.021814525	1	0.005245951
124	Control Summer	Summer	Control	124	0	0	0	0	0	0	0	-87.17	30.38504816	6.8045402	21.3640995	31.15819931	6.95848989	0.0711084	675.0124355	2846.63267	0.03003003	4.689837575	26.78527451	27.80915022	-2.114702625	5.421175006	-3.349049091	0.295132503	0.02229375	0	0.023687152
125	Control Summer	Summer	Control	125	1401.939078	0	0	0	0	1.40193908	0	-87.16	30.38506141	6.4778399	21.39710045	31.70820045	6.33361006	0.0417127	1254.372613	2568.797689	0.01799358	4.83453238	25.9015255	27.94019985	-1.64330752	4.504425047	-3.768000598	0.281771742	0.022622949	0	0.026191398
126	Control Summer	Summer	Control	126	3031.158324	0	0	0	0	3.03115832	0	-87.15	30.38507382	6.25665	20.92560005	31.82449913	5.53075981	0.16597	854.7092938	2366.725623	0.15549648	5.149167538	24.17752457	28.18427515	-1.107482462	3.251924517	-3.64022398	0.270605758	0.0228114	0	0.014057816
127	Control Summer	Summer	Control	127	1123.259589	0	0	0	0	1.12325959	0	-87.14	30.38508541	6.1048598	20.20330048	31.74699974	2.28768992	0.346167	27.5815513	2034.675399	0.26427274	5.564594984	22.12442446	28.49349976	-0.540264816	1.921123978	-3.253499984	0.264639504	0.022919975	0	0.015552256
128	Control Summer	Summer	Control	128	456.2940189	0	0	0	0	0.45629402	0	-87.13	30.38509617	6.1691599	10.45489979	29.62439919	0.44232601	0.14651699	0	1562.072954	0.19694434	6.01671505	19.77215004	28.81029987	-0.15244485	9.31725025	-0.814099317	0.388716236	0.031784299	0	0.008158709
129	Control Summer	Summer	Control	129	0	0	0	0	0	0	0	-87.24	30.39395623	7.77918	13.76780033	29.08569908	0.70297903	0.102379	0	3654.233931	0.09543162	4.531569958	27.91254997	27.6026001	-3.247610042	14.14474964	-1.483098982	0.453476764	0.041838426	0	0.070851643
130	Control Summer	Summer	Control	130	804.390401	0	0	0	0	0.8043904	0	-87.23	30.39397528	8.1366596	17.71910095	29.64419937	2.02648997	0.25348699	0	2730.650823	0.1306655	4.554242492	27.78932476	27.62849998	-3.582417108	10.07022381	-2.015699385	0.315816507	0.01979365	0	0.408271514
131	Control Summer	Summer	Control	131	4760.979908	0	0	0	0	4.76097991	0	-87.22	30.39399351	7.9938402	18.03560066	29.86310005	5.93239021	0.34906799	69.8680915	1885.481317	0.14306767	4.582360029	27.64667511	27.65817451	-3.411480171	9.61107445	-2.204925535	0.320106752	0.0201939	0	0.117125481
132	Control Summer	Summer	Control	132	1769.640762	0	0	0	0	1.76964076	0	-87.21	30.39401091	7.8218298	18.67420006	30.13319969	8.45057011	0.15452801	302.103307	1281.857829	0.09798434	4.614374995	27.50452518	27.68514967	-3.207454805	8.830325125	-2.44805002	0.321079746	0.020666725	0	0.053525444
133	Control Summer	Summer	Control	133	405.3509562	0	0	0	0	0.40535096	0	-87.2	30.39402747	7.6170998	19.45870018	30.40509987	9.16534996	0.105912	353.5313115	1195.213515	0.07500776	4.643954992	27.37550068	27.70615005	-2.973144808	7.916800499	-2.698949815	0.318277747	0.021129251	0	0.029939856
134	Control Summer	Summer	Control	134	4021.573658	0	0	0	0	4.02157366	0	-87.19	30.39404321	7.3530102	20.15200043	30.6284008	8.05049038	0.0835533	930.6235316	1310.1941	0.03790254	4.674942493	27.20780039	27.72852564	-2.678067707	7.055799958	-2.899875161	0.311603755	0.0215771	0	0.02026265
135	Control Summer	Summer	Control	135	2963.314311	0	0	0	0	2.96331431	0	-87.18	30.39405812	7.0164199	20.65929985	30.8640995	7.65399981	0.0308626	1671.372997	1920.017854	0.0111886	4.696895003	27.01922464	27.75260019	-2.319524897	6.359924794	-3.111499307	0.301188	0.022012251	0	0.007924374
136	Control Summer	Summer	Control	136	1138.097212	0	0	0	0	1.13809721	0	-87.17	30.3940722	6.6624198	20.83869934	31.29240036	7.15814018	0.0441944	1672.838242	2709.283771	0.00783828	4.695472598	26.86584997	27.77657461	-1.966947202	6.027150632	-3.515825748	0.28852126	0.02238425	0	0.00666136
137	Control Summer	Summer	Control	137	3015.609571	0	0	0	0	3.01560957	0	-87.16	30.39408545	6.36724	20.58959961	31.62450027	6.32505989	0.0467957	1984.537482	3533.601492	0.00867365	4.731767535	26.42490005	27.8418498	-1.635472465	5.835300445	-3.782650466	0.275866501	0.02263105	0	0.007596412
138	Control Summer	Summer	Control	138	0	0	0	0	0	0	0	-87.15	30.39409787	6.1557598	20.00200081	31.67620087	5.85865021	0.0498347	1432.409778	3319.104263	0.03591916	5.01888752	24.6244998	28.07380009	-1.13687228	4.622498988	-3.602400783	0.264900744	0.022749625	0	0.023794525
139	Control Summer	Summer	Control	139	2177.713076	0	0	0	0	2.17771308	0	-87.14	30.39410946	6.0096202	19.28000069	31.61100006	6.28704977	0.0929534	831.3114207	2933.223615	0.09680779	5.524988079	21.99832001	28.45209999	-0.484632121	2.718319317	-3.158900069	0.258213598	0.02284078	0	0.052097704
140	Control Summer	Summer	Control	140	3237.351665	0	0	0	0	3.23735166	0	-87.13	30.39412022	5.90451	18.57659912	31.56529999	5.22940016	0.27696401	394.2088727	2502.167831	0.2399581	5.955585003	19.80747461	28.75640011	0.051075003	1.230875493	-2.808899882	0.251181494	0.02293665	0	0.020256648
141	Control Summer	Summer	Control	141	2540.387677	0	0	0	0	2.54038768	0	-87.12	30.39413015	5.8310299	18.05330086	31.5468998	2.74043012	0.32266101	36.3597861	2256.183944	0.1689662	5.977465153	19.5149498	28.74517488	0.146435253	1.461648939	-2.801724915	0.246404	0.02312685	0	0.042933118
142	Control Summer	Summer	Control	142	1703.956109	0	0	0	0	1.70395611	0	-87.11	30.39413925	5.9382801	13.88000011	30.53569984	1.02257001	0.21264	0	1944.68176	0.1691948	5.9528567	19.6503671	28.71299998	0.0145766	5.770366991	-1.82269986	0.314223744	0.02774815	0	0.023845433
143	Control Summer	Summer	Control	143	0	0	0	0	0	0	0	-87.1	30.39414752	6.0742698	10.10359955	29.45630074	0.146331	0.0547589	0	1779.5682	0.07878441	6.060255051	19.5401001	28.82215023	-0.014014749	9.436500548	-0.63415051	0.385044735	0.032456175	0	0.032863548
144	Control Summer	Summer	Control	144	0	0	0	0	0	0	0	-87.27	30.40293959	6.42028	2.17842007	27.60619926	0.61037999	0.0144374	0	5452.488011	0.01458737	4.5581	27.7719	27.6313	-1.86218	25.59347993	0.02510074	0.643676251	0.069191799	0	1.06E-07
145	Control Summer	Summer	Control	145	0	0	0	0	0	0	0	-87.25	30.40296032	6.3666301	5.7990799	28.81609917	0.93960398	0.0866874	0	4453.386779	0.06490813	4.5581	27.7719	27.6313	-1.8085301	21.9728201	-1.18479917	0.573193312	0.051583365	0	0.000127929
146	Control Summer	Summer	Control	146	0	0	0	0	0	0	0	-87.24	30.40298021	6.3145399	7.21735001	29.38780022	0.87637901	0.0240753	0	3454.805652	0.0130215	4.5581	27.7719	27.6313	-1.7564399	20.55454999	-1.75650022	0.520444497	0.053391174	0	0.000269895
147	Control Summer	Summer	Control	147	0	0	0	0	0	0	0	-87.23	30.40299927	6.7698498	8.19696045	28.93009949	0.63576102	0.0291431	0	2457.378763	0.02607335	4.564045191	27.74100018	27.63770008	-2.205804609	19.54403973	-1.292399409	0.419254258	0.036507451	0	0.034050155
148	Control Summer	Summer	Control	148	0	0	0	0	0	0	0	-87.22	30.4030175	7.1348701	10.5934	28.99609947	1.70541	0.20790499	0	1463.468032	0.18084416	4.609513283	27.53199959	27.67746735	-2.525356817	16.93859959	-1.318632124	0.372511499	0.028581426	0	0.023472823
149	Control Summer	Summer	Control	149	0	0	0	0	0	0	0	-87.21	30.40303491	7.0325699	10.33240032	28.97850037	3.98839998	0.34566501	0	494.7393001	0.11685095	4.651656628	27.3634332	27.70443344	-2.380913272	17.03103288	-1.274066929	0.374168009	0.028845375	0	0.041730385
150	Control Summer	Summer	Control	150	3275.343934	0	0	0	0	3.27534393	0	-87.2	30.40305148	7.3976798	19.52619934	30.65390015	4.66575003	0.47077101	0	195.2135147	0.26902204	4.744589925	27.00177479	27.75110054	-2.653089875	7.475575448	-2.90279961	0.31229575	0.0214307	0	0.002818115
151	Control Summer	Summer	Control	151	470.4440626	0	0	0	0	0.47044406	0	-87.19	30.40306722	7.1347899	19.89080048	30.89069939	6.17251015	0.120151	650.7040604	505.8083926	0.04028478	4.822497487	26.65920067	27.78997517	-2.312292413	6.768400188	-3.100724224	0.304486252	0.021807775	0	0.043694075
152	Control Summer	Summer	Control	152	851.8833624	0	0	0	0	0.85188336	0	-87.18	30.40308213	6.8204198	20.02070045	31.11120033	6.93339014	0.0717957	926.0225178	1321.275615	0.02789286	4.899412513	26.26377535	27.83239985	-1.921007287	6.243074899	-3.278800485	0.293768503	0.022158925	0	0.021631179
153	Control Summer	Summer	Control	153	3404.60976	0	0	0	0	3.40460976	0	-87.17	30.40309622	6.5109601	19.8572998	31.32769966	7.07275009	0.0348384	1624.96534	2248.126222	0.01126586	4.897045016	26.11009979	27.84497499	-1.613915084	6.252799992	-3.482724665	0.281549998	0.022436325	0	0.008372523
154	Control Summer	Summer	Control	154	0	0	0	0	0	0	0	-87.16	30.40310947	6.2586298	19.41839981	31.4545002	6.23596001	0.0610657	2114.675497	3218.814033	0.00545793	4.797692418	26.14414978	27.83097506	-1.460937382	6.72574997	-3.623525144	0.269758247	0.02258875	0	0.005455018
155	Control Summer	Summer	Control	155	1280.824459	0	0	0	0	1.28082446	0	-87.15	30.4031219	6.0748501	18.80940056	31.46030045	5.57023001	0.0231073	2222.619568	4203.267306	0.01495254	4.929150105	24.74942541	27.97644997	-1.145699995	5.940024851	-3.483850484	0.259515002	0.0226097	0	0.009353564
156	Control Summer	Summer	Control	156	2522.767868	0	0	0	0	2.52276787	0	-87.14	30.40313349	5.9472399	18.17079926	31.43569946	5.77310991	0.0435741	1706.40202	3797.969552	0.02213891	5.284199953	22.546525	28.25755024	-0.663039947	4.375725742	-3.17814922	0.252296493	0.0226091	0	0.032852465
157	Control Summer	Summer	Control	157	0	0	0	0	0	0	0	-87.13	30.40314425	5.8605199	17.62299919	31.44580078	5.81275988	0.0519427	1320.920876	3472.384519	0.03351817	5.612515092	20.82564974	28.49172497	-0.248004808	3.202650548	-2.954075812	0.246933501	0.022637925	0	0.078048973
158	Control Summer	Summer	Control	158	3434.296881	0	0	0	0	3.43429688	0	-87.12	30.40315419	5.8038802	17.3307991	31.48880005	5.6559	0.0455425	969.5745461	3209.946743	0.04449952	5.726265073	20.2321496	28.5560503	-0.077615127	2.901350501	-2.932749749	0.242944252	0.022712174	0	0.111092044
159	Control Summer	Summer	Control	159	887.842598	0	0	0	0	0.8878426	0	-87.11	30.40316329	5.7704401	17.52090073	31.50289917	5.11375999	0.156877	561.0237463	2906.142999	0.13425503	5.837842464	19.96049976	28.6408	0.067402364	2.439599033	-2.862099171	0.242143501	0.023038901	0	0.058163397
160	Control Summer	Summer	Control	160	1171.394795	0	0	0	0	1.17139479	0	-87.1	30.40317157	5.7550998	18.26639938	31.31270027	3.23082995	0.329907	160.9117866	2776.20736	0.1428638	6.014607668	19.62325001	28.82480001	0.259507868	1.356850628	-2.487900256	0.245288748	0.02380415	0	0.061521339
161	Control Summer	Summer	Control	161	2172.172185	0	0	0	0	2.17217219	0	-87.09	30.40317901	5.7547798	19.26250076	30.83440018	1.03293002	0.13113201	0	2514.341634	0.17125328	6.206937432	19.22379971	29.08650017	0.452157632	-0.038701054	-1.747900012	0.253772002	0.02540095	0	0.034618863
162	Control Summer	Summer	Control	162	4003.499979	0	0	0	0	4.00349998	0	-87.08	30.40318563	5.7638998	19.84989929	30.34460068	0.97150803	0.173728	0	2230.510756	0.12942272	6.316460013	18.8838253	29.3592	0.552560213	-0.966073988	-0.985400679	0.266707741	0.027456275	0	0.072198577
163	Control Summer	Summer	Control	163	4289.78947	0	0	0	0	4.28978947	0	-87.07	30.40319142	5.77811	19.43919945	29.87859917	1.39716005	0.22317401	0	2223.570512	0.16327677	6.370095134	18.63682508	29.58400011	0.591985134	-0.802374365	-0.294599059	0.282267749	0.029296375	0	0.068950087
164	Control Summer	Summer	Control	164	2238.674593	8	4	0	1	2.23867459	0.44669288	-87.06	30.40319637	5.7934299	17.74699974	29.06529999	1.32532001	0.226932	51.4735857	2129.289491	0.16946093	6.384124875	18.48992491	29.7406497	0.590694975	0.742925168	0.67534971	0.298647501	0.030614775	1	0.021665516
165	Control Summer	Summer	Control	165	2582.595769	0	0	0	0	2.58259577	0	-87.05	30.4032005	5.8047099	16.2262001	29.14419937	1.57130003	0.27785999	25.3390957	1816.75185	0.23972793	6.381222057	18.42710037	29.8203598	0.576512157	2.200900272	0.676160432	0.315647608	0.03233678	0	0.045133076
166	Control Summer	Summer	Control	166	1390.771783	0	0	0	0	1.39077178	0	-87.04	30.40320379	5.8087802	15.05959988	30.00449944	1.24416995	0.23735601	0	1738.825084	0.22886859	6.364885092	18.42920017	29.84392548	0.556104892	3.369600292	-0.160573964	0.326092497	0.032767775	0	0.053643047
167	Control Summer	Summer	Control	167	51.25627347	0	0	0	0	0.05125627	0	-87.03	30.40320626	5.95439	11.05879974	29.73530006	0.40039799	0.12283	0	1597.954229	0.14982483	6.310169935	18.5017004	29.84574986	0.355779935	7.442900661	0.110449795	0.427549489	0.035644224	0	0.043898888
168	Control Summer	Summer	Control	168	0	0	0	0	0	0	0	-87.2	30.41207547	6.9803901	14.95709991	29.98760033	1.02035999	0.242577	0	0	0.21395679	4.874016603	26.49993324	27.80993334	-2.106373497	11.54283333	-2.177666985	0.366263241	0.029465025	0	0.008854313
169	Control Summer	Summer	Control	169	0	0	0	0	0	0	0	-87.19	30.41209122	6.94526	19.44569969	30.96290016	3.97274995	0.29801801	0	153.3461347	0.14509063	5.027002454	25.87169981	27.88212538	-1.918257546	6.42600012	-3.080774782	0.297789998	0.0219711	0	0.023175002
170	Control Summer	Summer	Control	170	3335.485353	0	0	0	0	3.33548535	0	-87.18	30.41210614	6.6424398	19.09189987	31.09140015	4.9323802	0.262503	439.7625559	1153.346135	0.13425289	5.258220077	24.89400005	27.99415016	-1.384219723	5.802100183	-3.097249988	0.286533758	0.022247876	0	0.017031627
171	Control Summer	Summer	Control	171	143.0854275	0	0	0	0	0.14308543	0	-87.17	30.41212023	6.3660402	18.5571003	31.17149925	6.59517002	0.0822675	716.1729595	2153.346135	0.07282923	5.402539968	24.12174988	28.07425022	-0.963500232	5.564649578	-3.097249029	0.274482749	0.022447575	0	0.027358526
172	Control Summer	Summer	Control	172	361.8932129	0	0	0	0	0.36189321	0	-87.16	30.41213349	6.15693	17.98539925	31.20359993	6.37161016	0.0405067	1412.641371	3153.346135	0.01070162	5.243939996	24.06604958	28.03995037	-0.912990004	6.080650326	-3.163649559	0.263719246	0.022510725	0	0.023796968
173	Control Summer	Summer	Control	173	3557.627008	0	0	0	0	3.55762701	0	-87.15	30.41214591	6.00665	17.42700005	31.20829964	5.72012997	0.0300139	2231.484625	4153.346135	0.01190421	5.049849987	23.76307535	28.01779985	-0.956800013	6.336075302	-3.190499786	0.254583009	0.022433325	0	0.009397775
174	Control Summer	Summer	Control	174	0	0	0	0	0	0	0	-87.14	30.41215751	5.9011898	16.90859985	31.22100067	5.50633001	0.00309354	2626.654656	4716.497076	0.00265412	5.094022512	22.80229998	28.11242533	-0.807167288	5.893700126	-3.108575343	0.248024002	0.0223186	0	0.009359966
175	Control Summer	Summer	Control	175	2725.410331	0	0	0	0	2.72541033	0	-87.13	30.41216828	5.8296399	16.48970032	31.26049995	5.47713995	0.0159441	2266.606995	4455.747559	0.02429016	5.285144925	21.66772461	28.25534964	-0.544494975	5.178024289	-3.005150314	0.243084751	0.022193825	0	0.017879303
176	Control Summer	Summer	Control	176	1057.800622	0	0	0	0	1.05780062	0	-87.12	30.41217822	5.78372	16.3383007	31.33449936	5.46169996	0.015394	1871.218873	4171.800767	0.0220565	5.453312635	20.92209959	28.36759949	-0.330407365	4.58379889	-2.966899873	0.239430498	0.022043025	0	0.038508921
177	Control Summer	Summer	Control	177	0	0	0	0	0	0	0	-87.11	30.41218733	5.7574	16.68560028	31.42440033	5.52361012	0.0150296	1484.283129	3887.10009	0.01803011	5.671280026	20.32279968	28.55235004	-0.086119974	3.637199403	-2.872050286	0.238527753	0.0220436	0	0.083262215
178	Control Summer	Summer	Control	178	4357.877306	3	1	0	1	4.35787731	0.229469517	-87.1	30.4121956	5.7466898	17.42670059	31.32749939	6.00594997	0.0781715	1063.604865	3772.330347	0.05911399	5.906972528	19.75955009	28.8380003	0.160282728	2.332849505	-2.489499092	0.240875751	0.022312325	1	0.029766014
179	Control Summer	Summer	Control	179	199.7554294	0	0	0	0	0.19975543	0	-87.09	30.41220305	5.74824	18.14010048	30.89690018	5.00290012	0.26982599	882.2434728	3431.320121	0.22044315	6.090372443	19.28569984	29.16884995	0.342132443	1.145599364	-1.728050235	0.2469665	0.022957725	0	0.021621954
180	Control Summer	Summer	Control	180	2552.784782	0	0	0	0	2.55278478	0	-87.08	30.41220967	5.7579799	18.66720009	30.55850029	4.95542002	0.181153	871.9336486	3228.361698	0.16746416	6.207560062	18.92764997	29.46020031	0.449580162	0.260449885	-1.09829998	0.256997496	0.0238677	0	0.043738212
181	Control Summer	Summer	Control	181	2347.060378	0	0	0	0	2.34706038	0	-87.07	30.41221546	5.7719998	18.38089943	30.37000084	4.68701982	0.115585	936.9327488	3223.570512	0.04940389	6.27895999	18.68205023	29.66620016	0.50696019	0.301150798	-0.703800679	0.270623498	0.024646449	0	0.15803649
182	Control Summer	Summer	Control	182	0	0	0	0	0	0	0	-87.06	30.41222042	5.7866402	16.89380074	30.12549973	3.98935008	0.0696934	1046.970492	3057.935434	0.03560686	6.312172532	18.54387474	29.78840065	0.525532332	1.650074001	-0.33709908	0.286381252	0.0252854	0	0.158616945
183	Control Summer	Summer	Control	183	5012.915305	2	0	0	1	5.0129153	0.199484719	-87.05	30.41222454	5.7982202	14.9375	30.19680023	4.66896009	0.0731843	1022.034797	2801.221851	0.0195006	6.313870072	18.49744987	29.84412527	0.515649872	3.559949875	-0.352674959	0.301668495	0.0263979	1	0.088997877
184	Control Summer	Summer	Control	184	0	0	0	0	0	0	0	-87.04	30.41222784	5.8050199	13.98900032	30.47900009	4.07020998	0.0746011	915.1269676	2738.825084	0.0434109	6.320824981	18.48067474	29.85330009	0.515805081	4.491674424	-0.625699995	0.319088258	0.029358525	0	0.410552082
185	Control Summer	Summer	Control	185	2809.958429	0	0	0	0	2.80995843	0	-87.03	30.41223031	5.8085899	13.83440018	30.64069939	2.89970994	0.137558	629.0314337	2576.664618	0.08612119	6.277595043	18.54922485	29.8420248	0.469005143	4.714824674	-0.798674587	0.329525493	0.028755	0	0.234432834
186	Control Summer	Summer	Control	186	2982.675049	0	0	0	0	2.98267505	0	-87.02	30.41223194	5.8106599	14.16559982	30.77190018	1.70015001	0.117342	217.4058434	2429.827039	0.07917809	6.227862477	18.64434958	29.81055021	0.417202577	4.478749755	-0.961349967	0.339489751	0.02778095	0	0.2051143
187	Control Summer	Summer	Control	187	1736.360382	0	0	0	0	1.73636038	0	-87	30.41223275	5.81177	14.69099998	30.88249969	0.79744703	0.143499	0	2286.249973	0.09588991	6.181680083	18.74327517	29.76947498	0.369910083	4.052275186	-1.113024707	0.349420503	0.026919125	0	0.137480824
188	Control Summer	Summer	Control	188	0	0	0	0	0	0	0	-86.99	30.41223273	6.1003699	8.55228043	29.26910019	0.422943	0.0679352	0	2134.520596	0.0619003	6.140944958	18.83899975	29.72360039	0.040575058	10.28671932	0.454500198	0.44137574	0.033393225	0	0.078335947
189	Control Summer	Summer	Control	189	0	0	0	0	0	0	0	-87.19	30.42111521	6.5051298	6.98014021	28.60110092	0.99492103	0.0953574	0	350.3881953	0.07566784	5.266799927	24.93799973	27.99399948	-1.238329873	17.95785952	-0.607101439	0.490777001	0.04481445	0	0.004729119
190	Control Summer	Summer	Control	190	327.0597717	0	0	0	0	0.32705977	0	-87.18	30.42113013	6.4450102	13.55379963	30.03179932	0.848961	0.180683	0	1198.191968	0.15084578	5.586505175	23.66854954	28.14595032	-0.858505025	10.11474991	-1.885849003	0.423430249	0.0337416	0	0.012520749
191	Control Summer	Summer	Control	191	2132.636109	0	0	0	0	2.13263611	0	-87.17	30.42114422	6.2259302	17.03019905	30.94440079	4.32636976	0.29304501	15.2894328	2178.053079	0.17651478	6.067545056	21.6484499	28.38482523	-0.158385144	4.618250848	-2.55957556	0.267205	0.022431725	0	0.032888322
192	Control Summer	Summer	Control	192	4210.829871	0	0	0	0	4.21082987	0	-87.16	30.42115749	6.0633702	16.39609909	30.93540001	6.15121984	0.0543028	880.8649836	3170.515169	0.0319932	5.705047369	22.0220747	28.26920033	-0.358322831	5.625975609	-2.666199685	0.258006997	0.022412899	0	0.076836102
193	Control Summer	Summer	Control	193	0	0	0	0	0	0	0	-87.15	30.42116992	5.94767	15.9605999	30.95339966	5.65345001	0.0294469	1820.257392	4166.583452	0.01607448	5.160884976	22.83235025	28.08317518	-0.786785024	6.871750354	-2.870224478	0.250372507	0.022256225	0	0.017181689
194	Control Summer	Summer	Control	194	2055.957466	0	0	0	0	2.05595747	0	-87.14	30.42118152	5.8648601	15.61590004	30.98480034	5.37898016	0.0277469	2782.855327	5164.171655	0.01609862	4.955215096	22.83519983	28.03327465	-0.909645004	7.219299793	-2.951525689	0.244634498	0.0220331	0	0.004826004
195	Control Summer	Summer	Control	195	1937.598087	0	0	0	0	1.93759809	0	-87.13	30.42119229	5.8073401	15.32250023	31.01309967	4.96585989	0.0538233	2974.446602	5417.168772	0.01165573	5.01783514	22.22284985	28.0873251	-0.78950496	6.900349616	-2.925774574	0.240064003	0.02173835	0	0.005190441
196	Control Summer	Summer	Control	196	3083.148	0	0	0	0	3.083148	0	-87.11	30.42121135	5.7486801	15.35000038	31.0401001	4.82856989	0.0859288	1757.336829	4875.800149	0.02440446	5.503982544	20.65962505	28.46407509	-0.244697556	5.309624673	-2.576025011	0.235241998	0.020962825	0	0.03984773
197	Control Summer	Summer	Control	197	1802.532469	0	0	0	0	1.80253247	0	-87.1	30.42121963	5.7409101	15.90209961	30.93899918	4.85723019	0.13645101	1397.045525	4741.090098	0.07550343	5.808222651	19.87094975	28.86339998	0.067312551	3.968850135	-2.075599198	0.236519251	0.020707025	0	0.053967942
198	Control Summer	Summer	Control	198	1638.002334	0	0	0	0	1.63800233	0	-87.09	30.42122708	5.7438302	16.6284008	30.68400002	5.11121988	0.177248	1392.582119	4384.187359	0.13766417	5.986177564	19.31855059	29.28747511	0.242347364	2.690149787	-1.396524911	0.240866251	0.020616675	0	0.037805038
199	Control Summer	Summer	Control	199	3008.34957	0	0	0	0	3.00834957	0	-87.08	30.4212337	5.7540102	17.22260094	30.49609947	5.30483007	0.0896207	1624.899625	4227.228439	0.06144001	6.101644993	18.95252466	29.59814978	0.347634793	1.729923722	-0.897949694	0.24895275	0.020545875	0	0.061362796
200	Control Summer	Summer	Control	200	3360.680437	0	0	0	0	3.36068044	0	-87.06	30.42124445	5.7821398	15.99409962	30.37949944	3.7939899	0.0643249	2036.205332	4003.047327	0.04152657	6.230507493	18.60997534	29.84327507	0.448367693	2.615875718	-0.53622437	0.277296253	0.019451025	0	0.023761834
201	Control Summer	Summer	Control	201	456.0169416	0	0	0	0	0.45601694	0	-87.05	30.42124858	5.7939701	14.38469982	30.39290047	3.85671997	0.0368751	2018.730499	3791.689342	0.01248011	6.239092469	18.5850997	29.86217546	0.445122369	4.200399877	-0.530725005	0.293487757	0.020873625	0	0.05402349
202	Control Summer	Summer	Control	202	825.5198383	0	0	0	0	0.82551984	0	-87.04	30.42125188	5.8021698	13.71790028	30.52829933	3.70193005	0.0349579	1881.408032	3738.825084	0.0305081	6.258450031	18.56547546	29.85390043	0.456280231	4.847575184	-0.674398897	0.311704256	0.0249918	0	0.083633411
203	Control Summer	Summer	Control	203	3042.555479	0	0	0	0	3.04255548	0	-87.03	30.42125434	5.80724	13.90509987	30.65979958	3.29497004	0.0829556	1528.718975	3567.203861	0.04814751	6.226212502	18.63082457	29.82902527	0.418972502	4.725724696	-0.830774311	0.326378994	0.025714775	0	0.097626766
204	Control Summer	Summer	Control	204	0	0	0	0	0	0	0	-87.02	30.42125598	5.8101702	14.38739967	30.76530075	2.30421996	0.0460535	1115.638078	3419.843588	0.01449409	6.18918252	18.71455002	29.79075003	0.37901232	4.327150348	-0.974550723	0.34024474	0.025907225	0	0.132456103
205	Control Summer	Summer	Control	205	1165.521888	0	0	0	0	1.16552189	0	-87	30.42125679	5.8116698	14.94190025	30.85569954	1.91875994	0.0417363	693.3836063	3285.81818	0.03294152	6.154187441	18.79982519	29.74775028	0.342517641	3.857924941	-1.107949258	0.352581255	0.02589225	0	0.149492402
206	Control Summer	Summer	Control	206	2616.162804	0	0	0	0	2.6161628	0	-86.99	30.42125677	5.8122301	15.56949997	30.8885994	1.63268006	0.133074	241.1107269	3076.720188	0.09869153	6.12460506	18.87597466	29.70674992	0.31237496	3.306474685	-1.181849484	0.362875253	0.02571785	0	0.100801767
207	Control Summer	Summer	Control	207	0	0	0	0	0	0	0	-86.98	30.42125591	5.9563298	12.62049961	30.08779907	0.88700801	0.082271	0	2897.024455	0.06001346	6.100182533	18.93965006	29.67182541	0.143852733	6.319150449	-0.415973661	0.37075825	0.02530315	0	0.101614571
208	Control Summer	Summer	Control	208	0	0	0	0	0	0	0	-87.19	30.43013918	6.3811302	0.855129	27.36330032	1.13274002	0.057844	0	1315.634146	0.04885229	5.2668	24.938	27.994	-1.1143302	24.082871	0.63069968	0.56023775	0.05212095	0	0.000229418
209	Control Summer	Summer	Control	209	0	0	0	0	0	0	0	-87.18	30.43015411	6.3948698	0.28557199	27.18390083	0.66260701	0.101635	0	1751.904914	0.05937599	5.2668	24.938	27.994	-1.1280698	24.65242801	0.81009917	0.621673495	0.039896851	0	0.002388447
210	Control Summer	Summer	Control	210	2154.423097	0	0	0	0	2.1544231	0	-87.17	30.43016821	6.09198	15.23999977	30.68300056	1.24076998	0.26565599	0	2527.416599	0.20062107	6.166490078	20.49989986	28.4850502	0.074510078	5.259900094	-2.197950359	0.411671497	0.0337852	0	0.004424946
211	Control Summer	Summer	Control	211	520.0605275	0	0	0	0	0.52006053	0	-87.16	30.43018148	5.9808002	14.75520039	30.67910004	5.52167988	0.15224101	646.2957142	3419.954077	0.15100006	5.672635078	21.46029949	28.30422497	-0.308165122	6.705099102	-2.374875072	0.25301075	0.022306825	0	0.030037885
212	Control Summer	Summer	Control	212	1315.95711	0	0	0	0	1.31595711	0	-87.15	30.43019391	5.8978901	14.54339981	30.7215004	5.38502979	0.0214022	1646.180169	4359.396416	0.00971232	5.100337625	22.55320072	28.09777498	-0.797552475	8.009800912	-2.623725418	0.247163501	0.02210775	0	0.023512793
213	Control Summer	Summer	Control	213	2615.581826	0	0	0	0	2.61558183	0	-87.14	30.43020552	5.83637	14.44470024	30.76490021	5.03142023	0.0404804	2646.064624	5320.957464	0.00891829	4.818825006	22.96627522	27.99554968	-1.017544994	8.521574975	-2.769350531	0.242347751	0.02180745	0	0.004966404
214	Control Summer	Summer	Control	214	0	0	0	0	0	0	0	-87.13	30.4302163	5.79177	14.31569958	30.76490021	4.42538023	0.0422554	2391.090673	6294.508683	0.00562952	4.80893755	22.67337513	27.99107504	-0.98283245	8.35767555	-2.773825171	0.238168005	0.021377075	0	0.007075625
215	Control Summer	Summer	Control	215	2264.626681	0	0	0	0	2.26462668	0	-87.12	30.43022624	5.7616801	14.12049961	30.69140053	3.77837992	0.0535941	1561.638017	6061.546675	0.01428217	4.971264958	22.01149988	28.0784502	-0.790415142	7.891000272	-2.612950327	0.234839	0.0207852	0	0.02226571
216	Control Summer	Summer	Control	216	1973.845003	0	0	0	0	1.973845	0	-87.11	30.43023536	5.7444201	13.94460011	30.52540016	3.50295997	0.0718397	944.0549154	5868.330859	0.0107897	5.403447509	20.89764977	28.40172529	-0.340972591	6.953049655	-2.123674868	0.233135503	0.020132725	0	0.065766856
217	Control Summer	Summer	Control	217	2163.957086	0	0	0	0	2.16395709	0	-87.1	30.43024364	5.7386498	14.19470024	30.35160065	2.67041993	0.124253	408.1322849	5658.423079	0.05328273	5.774920106	19.89002514	28.89494991	0.036270306	5.695324899	-1.456650737	0.233609501	0.01949225	0	0.09630257
218	Control Summer	Summer	Control	218	4176.914976	0	0	0	0	4.17691498	0	-87.09	30.43025109	5.7426	15.11530018	30.29730034	1.60819995	0.16886801	392.582119	5354.273043	0.108129	5.903045058	19.31162548	29.43437529	0.160445058	4.196325301	-0.862925054	0.237133	0.018868975	0	0.052483646
219	Control Summer	Summer	Control	219	0	0	0	0	0	0	0	-87.08	30.43025771	5.7530699	15.83839989	30.26379967	3.10244012	0.124611	867.4604739	5226.528609	0.04754325	6.022768021	18.92182007	29.78131981	0.269698121	3.083420178	-0.482479861	0.246587002	0.0179957	0	0.065861688
220	Control Summer	Summer	Control	220	2276.932407	0	0	0	0	2.27693241	0	-87.07	30.43026351	5.7666402	15.91740036	30.25880051	2.54191995	0.121817	1354.161908	5223.570512	0.03959312	6.122400045	18.7323246	29.87360001	0.355759845	2.81492424	-0.385200504	0.262840003	0.017157525	0	0.020352578
221	Control Summer	Summer	Control	221	1680.350066	0	0	0	0	1.68035007	0	-87.06	30.43026847	5.7803502	15.31820011	30.28350067	2.33111	0.0951982	1482.028074	4965.001892	0.03141021	6.160519838	18.68084955	29.87924957	0.380169638	3.362649442	-0.404251097	0.280499257	0.01683695	0	0.016155023
222	Control Summer	Summer	Control	222	104.1219181	0	0	0	0	0.10412192	0	-87.05	30.4302726	5.7919402	14.45639992	30.3321991	2.84569001	0.0830767	2093.933945	4786.078346	0.01128879	6.173620065	18.6777668	29.86133321	0.381679865	4.22136688	-0.470865889	0.294725011	0.0181544	0	0.01484766
223	Control Summer	Summer	Control	223	3793.368547	0	0	0	0	3.79336855	0	-87.04	30.4302759	5.8004699	14.03909969	30.41659927	2.57608008	0.0873307	2841.337315	4738.825084	0.02718289	6.192404985	18.66822529	29.84054995	0.391935085	4.629125598	-0.576049324	0.309561245	0.0212641	0	0.006025693
224	Control Summer	Summer	Control	224	0	0	0	0	0	0	0	-87.03	30.43027837	5.8060999	14.20470047	30.51490021	1.96800995	0.0632349	2441.40134	4561.710633	0.06410298	6.165369987	18.74342003	29.79553986	0.359270087	4.538719559	-0.719360354	0.329990399	0.02300686	0	0.006402254
225	Control Summer	Summer	Control	225	0	0	0	0	0	0	0	-87.02	30.43028	5.8094702	14.68019962	30.61499977	1.88100004	0.019474	2027.020745	4406.953454	0.01734029	6.140597582	18.81619978	29.75034952	0.331127382	4.13600016	-0.864650248	0.347234249	0.02420315	0	0.017963381
226	Control Summer	Summer	Control	226	3843.708915	0	0	0	0	3.84370891	0	-87	30.43028081	5.8112402	15.26070023	30.71380043	1.74734998	0.0110037	1588.861775	4285.533442	0.00504464	6.116449952	18.8852253	29.70885038	0.305209752	3.624525066	-1.004950046	0.360017747	0.0247085	0	0.036348393
227	Control Summer	Summer	Control	227	0	0	0	0	0	0	0	-86.99	30.43028079	5.8119702	15.88860035	30.79929924	1.71090996	0.0311031	1091.807265	4041.47983	0.02208223	6.095399976	18.94572544	29.67229986	0.283429776	3.057125091	-1.126999378	0.369724996	0.024819875	0	0.05716095
228	Control Summer	Summer	Control	228	501.2710679	0	0	0	0	0.50127107	0	-86.98	30.43027994	5.8120899	16.66799927	30.8946991	1.71686995	0.0634572	487.3464818	3867.634091	0.05738363	6.077867508	18.99552488	29.64237547	0.265777608	2.327525613	-1.252323631	0.376783997	0.0246083	0	0.077762279
229	Control Summer	Summer	Control	229	2377.59741	0	0	0	0	2.37759741	0	-86.97	30.43027825	5.8119402	17.82390022	31.02079964	0.97955799	0.124077	0	3756.505955	0.09093275	6.063195992	19.03675995	29.6176403	0.251255792	1.212859729	-1.403159335	0.382182998	0.02421338	0	0.065470688
230	Control Summer	Summer	Control	230	0	0	0	0	0	0	0	-87.19	30.43916314	6.3843899	0.73734999	27.32439995	1.20367002	0.0505357	0	2310.630153	0.05109327	5.2668	24.938	27.994	-1.1175899	24.20065001	0.66960005	0.562381665	0.051751434	0	0.000125665
231	Control Summer	Summer	Control	231	0	0	0	0	0	0	0	-87.18	30.43917807	6.39466	0.28704199	27.18499947	0.69019598	0.103915	0	2585.977551	0.07665502	5.2668	24.938	27.994	-1.12786	24.65095801	0.80900053	0.565558672	0.045203832	0	0.000313153
232	Control Summer	Summer	Control	232	2951.236344	0	0	0	0	2.95123634	0	-87.17	30.43919218	5.97649	13.5642004	30.44869995	1.27956998	0.25181401	0	3164.716734	0.19763134	5.614904881	21.27547503	28.32044983	-0.361585119	7.711274625	-2.128250121	0.313866198	0.026845821	0	0.012627958
233	Control Summer	Summer	Control	233	3544.57417	0	0	0	0	3.54457417	0	-87.16	30.43920545	5.9115	13.28639984	30.46450043	5.34412003	0.0856792	578.8716387	3916.631887	0.09694712	5.205255032	22.12029982	28.17670012	-0.706244968	8.833899976	-2.287800315	0.247114748	0.02212465	0	0.047384803
234	Control Summer	Summer	Control	234	3398.674635	0	0	0	0	3.39867464	0	-87.15	30.43921789	5.8583698	13.37479973	30.55069923	5.39998007	0.0279387	1540.025913	4759.018445	0.00673456	4.835397482	22.95399952	28.05185032	-1.022972318	9.579199789	-2.498848911	0.243215997	0.021857176	0	0.022669763
235	Control Summer	Summer	Control	235	2493.290298	0	0	0	0	2.4932903	0	-87.14	30.4392295	5.8154602	13.57979965	30.61269951	4.87806988	0.0329603	2454.802279	5653.008738	0.00313508	4.667297363	23.28724957	27.9935751	-1.148162837	9.707449915	-2.619124414	0.239909001	0.02150455	0	0.006069476
236	Control Summer	Summer	Control	236	1278.328761	0	0	0	0	1.27832876	0	-87.13	30.43924028	5.7821498	13.69480038	30.60110092	4.33195019	0.0323026	2081.505495	6577.59523	0.00196535	4.783262491	22.83467531	28.03849983	-0.998887309	9.139874932	-2.562601088	0.236744251	0.0210125	0	0.011013298
237	Control Summer	Summer	Control	237	3285.825613	0	0	0	0	3.28582561	0	-87.12	30.43925023	5.7585301	13.61320019	30.49410057	3.6245501	0.0643512	1090.323852	7028.9564	0.02883948	5.169371986	21.67505989	28.24631996	-0.589158114	8.061859701	-2.247780608	0.233686602	0.02024476	0	0.043299852
238	Control Summer	Summer	Control	238	1898.341455	0	0	0	0	1.89834145	0	-87.11	30.43925935	5.7445798	13.32040024	30.2663002	2.36466002	0.100347	170.6489865	6863.030457	0.05139613	5.746479988	20.11452484	28.67924976	0.001900188	6.794124601	-1.587050437	0.232263748	0.019373475	0	0.100990287
239	Control Summer	Summer	Control	239	208.8370448	0	0	0	0	0.20883704	0	-87.1	30.43926764	5.9017701	10.30599976	29.4109993	1.25846004	0.131906	0	6592.952249	0.09390581	5.898686727	19.46839968	29.13449987	-0.003083373	9.162399924	-0.276499432	0.305428498	0.024263975	0	0.033433461
240	Control Summer	Summer	Control	240	358.1055725	0	0	0	0	0.35810557	0	-87.09	30.43927509	5.9062901	11.20870018	29.42359924	0.90155202	0.0949109	0	6333.670409	0.07100897	5.939875007	19.06017494	29.71157455	0.033584907	7.851474762	0.287975314	0.311402746	0.02335155	0	0.036475265
241	Control Summer	Summer	Control	241	1320.299427	0	0	0	0	1.32029943	0	-87.08	30.43928172	5.7557998	14.94960022	30.03750038	2.19572997	0.0928743	148.4840174	6226.053511	0.06640387	6.031294942	18.83207512	29.89457464	0.275495142	3.882474899	-0.142925738	0.252633501	0.01667355	0	0.068665512
242	Control Summer	Summer	Control	242	5489.880053	0	0	0	0	5.48988005	0	-87.07	30.43928751	5.76861	15.01869965	30.02050018	1.24115002	0.0990254	354.1619078	6217.496962	0.05633372	6.086634994	18.76319981	29.90519953	0.318024994	3.744500156	-0.115300652	0.275489248	0.016110425	0	0.023883489
243	Control Summer	Summer	Control	243	467.4969926	0	0	0	0	0.46749699	0	-87.06	30.43929247	5.78123	14.74559975	30.03949928	1.72710001	0.0375604	689.3654654	5939.450853	0.03722846	6.105992556	18.77229977	29.86380005	0.324762556	4.026700017	-0.175699231	0.295589753	0.016399225	0	0.020867738
244	Control Summer	Summer	Control	244	3327.723546	0	0	0	0	3.32772355	0	-87.05	30.43929661	5.7918401	14.37679958	30.09300041	1.88357997	0.0229901	1615.526357	5782.402944	0.01951758	6.121527433	18.78207493	29.82389975	0.329687333	4.405275348	-0.269100664	0.310564257	0.01802885	0	0.008172138
245	Control Summer	Summer	Control	245	242.8048699	0	0	0	0	0.24280487	0	-87.04	30.43929991	5.79985	14.22780037	30.17219925	1.83449996	0.0159516	2583.600582	5719.990037	0.0143052	6.126629949	18.80327511	29.78875017	0.326779949	4.575474738	-0.383449078	0.325548746	0.02015195	0	0.002658683
246	Control Summer	Summer	Control	246	0	0	0	0	0	0	0	-87.03	30.43930238	5.8053298	14.42800045	30.27409935	1.77611995	0.00409905	3349.481713	5546.771192	0.00203222	6.11232245	18.85959959	29.74530029	0.30699265	4.43159914	-0.528799057	0.343074493	0.021774675	0	0.00124338
247	Control Summer	Summer	Control	247	3505.560217	0	0	0	0	3.50556022	0	-87.02	30.43930402	5.8087401	14.8920002	30.39669991	1.80623996	0.00204687	2929.379874	5391.502693	0.00070591	6.096347451	18.91682577	29.70407486	0.287607351	4.024825571	-0.69262505	0.357882246	0.022946	0	0.00279249
248	Control Summer	Summer	Control	248	466.0422188	0	0	0	0	0.46604222	0	-87	30.43930482	5.8106098	15.48719978	30.53569984	1.83279002	0.00613477	2465.476831	5285.335118	0.0021178	6.08118248	18.96912479	29.66757488	0.27057268	3.481925014	-0.868124957	0.369211257	0.023647925	0	0.006412846
249	Control Summer	Summer	Control	249	761.1178313	0	0	0	0	0.76111783	0	-86.99	30.4393048	5.81146	16.15950012	30.68829918	1.90601003	0.00822104	1894.903929	5020.050928	0.00150215	6.068097472	19.01297474	29.63757467	0.256637472	2.853474619	-1.050724507	0.377301	0.023919125	0	0.016321244
250	Control Summer	Summer	Control	250	4286.728895	0	0	0	0	4.2867289	0	-86.98	30.43930395	5.8117099	17.10309982	30.86910057	1.99011004	0.0161232	1157.494545	4848.358299	0.00746811	6.057515025	19.04752493	29.61420012	0.245805125	1.944425109	-1.254900455	0.382859498	0.0238785	0	0.041979611
251	Control Summer	Summer	Control	251	1830.95039	0	0	0	0	1.83095039	0	-86.97	30.43930226	5.8116698	18.73509979	31.08670044	1.99043	0.0474202	484.4727847	4711.921773	0.06259547	6.049249887	19.07379961	29.59657478	0.237580087	0.33869982	-1.490125657	0.386688247	0.023672825	0	0.053358141
252	Control Summer	Summer	Control	252	999.3710326	0	0	0	0	0.99937103	0	-86.96	30.43929975	5.8115301	19.97830009	31.26709938	0.85892701	0.121477	0	4451.577783	0.0867234	6.042852521	19.0937252	29.5833497	0.231322421	-0.884574886	-1.683749675	0.389443748	0.023419	0	0.0484814
253	Control Summer	Summer	Control	253	0	0	0	0	0	0	0	-86.95	30.4392964	6.2442098	6.08821011	28.54599953	0.211393	0.0219353	0	4331.51408	0.01989716	6.037250042	19.11070061	29.57229996	-0.206959758	13.0224905	1.026300427	0.490122482	0.036200899	0	0.014927575
254	Control Summer	Summer	Control	254	0	0	0	0	0	0	0	-86.92	30.43928137	6.3885002	1.74557996	27.61720085	0.71302402	0.0346087	0	4130.90142	0.03557245	6.02932	19.1359	29.555	-0.3591802	17.39032004	1.93779915	0.522916973	0.040546499	0	0.008787545
255	Control Summer	Summer	Control	255	1799.666062	0	0	0	0	1.79966606	0	-86.91	30.4392747	6.3885798	1.74489999	27.61669922	0.94168103	0.0262525	0	3979.331042	0.04527175	6.029319763	19.1359005	29.55500031	-0.359260037	17.39100051	1.938301085	0.459058985	0.0316571	0	0.014948613
256	Control Summer	Summer	Control	256	0	0	0	0	0	0	0	-86.9	30.4392672	6.3885798	1.74482	27.61669922	0.84543699	0.0128147	0	3970.901269	0.00728237	6.029319763	19.1359005	29.55500031	-0.359260037	17.3910805	1.938301085	0.459058985	0.0316571	0	0.020516719
257	Control Summer	Summer	Control	257	0	0	0	0	0	0	0	-86.89	30.43925886	6.3886399	1.74423003	27.61639977	0.69045597	0.0322469	0	3931.621417	0.01317979	6.029319763	19.1359005	29.55500031	-0.359320137	17.39167047	1.938600535	0.427129991	0.0272124	0	0.0187246
258	Control Summer	Summer	Control	258	0	0	0	0	0	0	0	-87.2	30.44817132	6.3895302	0.51523399	27.25600052	1.09552002	0.0317693	0	3304.059249	0.02314148	5.2668	24.938	27.994	-1.1227302	24.42276601	0.73799948	0.563632742	0.051135525	0	0.000102056
259	Control Summer	Summer	Control	259	0	0	0	0	0	0	0	-87.19	30.44818709	6.3912802	0.42034	27.22780037	1.12691998	0.0669854	0	3308.644768	0.04619439	5.2668	24.938	27.994	-1.1244802	24.51766	0.76619963	0.564817329	0.047369634	0	0.000208206
260	Control Summer	Summer	Control	260	0	0	0	0	0	0	0	-87.18	30.44820203	6.3941598	0.28973001	27.18709946	0.68156099	0.0586738	0	3506.479487	0.02405826	5.2668	24.938	27.994	-1.1273598	24.64826999	0.80690054	0.565544501	0.045198525	0	0.000371668
261	Control Summer	Summer	Control	261	917.0526744	0	0	0	0	0.91705267	0	-87.17	30.44821614	6.1423702	6.26651001	28.73920059	0.63911402	0.17679299	0	3954.336153	0.17596539	5.439085007	21.38135052	28.2961998	-0.703285193	15.11484051	-0.443000791	0.406446755	0.033647	0	0.002976121
262	Control Summer	Summer	Control	262	1762.224266	0	0	0	0	1.76222427	0	-87.16	30.44822941	5.8638301	12.26270008	30.35000038	4.81156015	0.186152	219.0266256	4578.394171	0.15695573	5.293489933	21.74952507	28.24682522	-0.570340167	9.48682499	-2.103175162	0.245845001	0.022066825	0	0.056554028
263	Control Summer	Summer	Control	263	0	0	0	0	0	0	0	-87.15	30.44824186	5.83111	12.65639973	30.49370003	5.42519999	0.041725	1077.593947	5318.515956	0.01858181	5.016775012	22.63062525	28.14532471	-0.814334988	9.974225518	-2.348375323	0.243425254	0.021845025	0	0.049501069
264	Control Summer	Summer	Control	264	0	0	0	0	0	0	0	-87.14	30.44825348	5.8022499	13.15460014	30.56480026	4.75032997	0.0503236	1936.504903	6131.918724	0.00953881	4.714334965	23.46582508	28.05682468	-1.087914935	10.31122494	-2.507975576	0.240195747	0.021436275	0	0.013271224
265	Control Summer	Summer	Control	265	1103.833044	0	0	0	0	1.10383304	0	-87.13	30.44826426	5.7779799	13.57159996	30.5571003	4.1531601	0.039848	2053.865747	6993.473991	0.00516706	4.944885015	22.82980013	28.18157482	-0.833094885	9.258200169	-2.375525479	0.236833997	0.02083735	0	0.015861707
266	Control Summer	Summer	Control	266	2085.342935	0	0	0	0	2.08534294	0	-87.12	30.44827421	5.75984	13.81229973	30.5	3.47701001	0.0694064	1053.865747	7337.965256	0.03815922	5.439992428	21.2883997	28.50024939	-0.319847572	7.476099966	-1.999750614	0.23442075	0.020141225	0	0.06130371
267	Control Summer	Summer	Control	267	1881.666323	0	0	0	0	1.88166632	0	-87.11	30.44828333	5.7483301	13.8927002	30.40159988	1.64085996	0.117518	53.8657473	7208.592746	0.03584788	5.773225069	19.68315029	28.91529989	0.024894969	5.790450091	-1.486299988	0.23303175	0.0194687	0	0.114368868
268	Control Summer	Summer	Control	268	0	0	0	0	0	0	0	-87.1	30.44829162	6.38797	1.75039005	27.62039948	0.49022999	0.0262042	0	7195.092881	0.01086653	5.83111	19.30125	29.0282	-0.55686	17.55085995	1.40780052	0.521306485	0.041157975	0	0.000302852
269	Control Summer	Summer	Control	269	385.9604554	0	0	0	0	0.38596046	0	-87.08	30.44830571	6.0735898	8.18157005	28.77319908	0.50265002	0.0689525	0	7225.709886	0.06365154	6.026335001	18.83850002	29.89494991	-0.047254799	10.65692997	1.121750833	0.388421498	0.028800925	0	0.007138271
270	Control Summer	Summer	Control	270	1042.263358	0	0	0	0	1.04226336	0	-87.07	30.4483115	5.9275799	11.30360031	29.26729965	0.667005	0.0547077	0	7164.433389	0.03227524	6.059463342	18.83816655	29.86146673	0.131883442	7.534566245	0.594167076	0.352520496	0.0223392	0	0.014637587
271	Control Summer	Summer	Control	271	3345.638495	0	0	0	0	3.3456385	0	-87.06	30.44831647	5.7845302	14.34290028	29.8003006	1.81551003	0.063501	462.6675834	6915.441635	0.04780508	6.062292576	18.87617493	29.811625	0.277762376	4.533274647	0.011324404	0.316368498	0.0164919	0	0.01806062
272	Control Summer	Summer	Control	272	1873.388411	0	0	0	0	1.87338841	0	-87.05	30.4483206	5.7933002	14.24030018	29.84609985	1.91027999	0.0170479	1459.450607	6777.127538	0.00569546	6.068959999	18.90200005	29.76787987	0.275659799	4.661699866	-0.078219982	0.331115001	0.01765134	0	0.005628368
273	Control Summer	Summer	Control	273	0	0	0	0	0	0	0	-87.04	30.44832391	5.8001199	14.27810001	29.92840004	1.73301005	0.00862779	2456.327861	6694.329728	0.0034127	6.079324961	18.90714979	29.74362469	0.279205061	4.629049782	-0.184775353	0.339873754	0.0191748	0	0.001436478
274	Control Summer	Summer	Control	274	2394.613345	0	0	0	0	2.39461334	0	-87.03	30.44832638	5.8049698	14.53380013	30.04500008	1.71642995	0.00583984	3454.512893	6536.370354	0.000551	6.071957469	18.95137501	29.70292521	0.266987669	4.417574878	-0.342074875	0.355226755	0.02068075	0	0.000438039
275	Control Summer	Summer	Control	275	1402.658533	0	0	0	0	1.40265853	0	-87.02	30.44832802	5.8080902	14.99359989	30.19409943	1.80265999	0.00516184	3823.098472	6377.041409	0.00114342	6.063442469	18.99364996	29.66709995	0.255352269	4.00005007	-0.526999477	0.36779125	0.021874575	0	0.000370066
276	Control Summer	Summer	Control	276	479.9778053	0	0	0	0	0.47997781	0	-87	30.44832882	5.8099098	15.59619999	30.37120056	1.89863002	0.00803393	3305.809337	6238.807547	0.00221176	6.055307508	19.03079987	29.63697529	0.245397708	3.434599876	-0.734225272	0.377085	0.0226702	0	0.001114233
277	Control Summer	Summer	Control	277	3582.141305	0	0	0	0	3.58214131	0	-86.99	30.4483288	5.8108301	16.27820015	30.57439995	2.04464006	0.0114917	2566.873638	6005.685925	0.00089005	6.048379898	19.06095028	29.61297512	0.237549798	2.782750129	-0.961424829	0.383444004	0.023087925	0	0.004314672
278	Control Summer	Summer	Control	278	0	0	0	0	0	0	0	-86.98	30.44832795	5.8112102	16.99530029	30.80990028	2.16264009	0.0117577	1896.640789	5835.628752	0.00194774	6.042922497	19.08405018	29.59477472	0.231712297	2.088749889	-1.215125557	0.387596995	0.02322195	0	0.013455563
279	Control Summer	Summer	Control	279	3132.140097	0	0	0	0	3.1321401	0	-86.97	30.44832626	5.8113098	17.67840004	31.07229996	2.13392997	0.0151885	1184.809635	5665.402783	0.00549163	6.038725019	19.1012249	29.58119965	0.227415219	1.422824859	-1.491100314	0.390314505	0.023186025	0	0.036768174
280	Control Summer	Summer	Control	280	8284.731025	8	1	0	2	8.28473102	0.241407958	-86.96	30.44832374	5.8112898	17.93930054	31.2758007	1.90289998	0.0436629	480.2430432	5436.556609	0.05989163	6.03538239	19.11427498	29.57107496	0.22409259	1.174974439	-1.704725737	0.392204247	0.0230721	1	0.016018519
281	Control Summer	Summer	Control	281	1639.095042	0	0	0	0	1.63909504	0	-86.95	30.44832039	5.8112402	17.32889938	31.33399963	0.995013	0.119492	0	5326.07653	0.07843745	6.03263247	19.12432528	29.56354952	0.22139227	1.795425895	-1.770450111	0.393607497	0.022942525	0	0.065776414
282	Control Summer	Summer	Control	282	53.61969632	0	0	0	0	0.0536197	0	-86.94	30.44831622	6.2441702	5.40948009	28.55319977	0.30740401	0.0415641	0	5281.254941	0.06152758	6.031380177	19.12879944	29.56019974	-0.212790023	13.71931935	1.006999968	0.458720237	0.031695425	0	0.007720085
283	Control Summer	Summer	Control	283	2270.442693	0	0	0	0	2.27044269	0	-86.92	30.44830536	5.95544	13.19729996	30.22410011	1.19168997	0.13795	0	5105.890648	0.07561535	6.029319763	19.1359005	29.55500031	0.073879763	5.938600537	-0.669099805	0.427129991	0.0272124	0	0.056176111
284	Control Summer	Summer	Control	284	451.9032975	0	0	0	0	0.4519033	0	-86.91	30.44829869	6.3887901	1.74318004	27.61560059	0.79735702	0.0443752	0	4977.637802	0.05198221	6.029319763	19.1359005	29.55500031	-0.359470337	17.39272046	1.939399715	0.459058985	0.0316571	0	0.006872348
285	Control Summer	Summer	Control	285	0	0	0	0	0	0	0	-86.9	30.44829118	6.3887801	1.74319005	27.61560059	0.826832	0.0100851	0	4970.901269	0.003516	6.029319763	19.1359005	29.55500031	-0.359460337	17.39271045	1.939399715	0.490987979	0.0361018	0	0.009583877
286	Control Summer	Summer	Control	286	0	0	0	0	0	0	0	-87.2	30.45719525	6.3929	0.31469801	27.19960022	1.21561003	0.0358768	0	4304.059249	0.01749692	5.2668	24.938	27.994	-1.1261	24.62330199	0.79439978	0.565132737	0.0469458	0	0.000186224
287	Control Summer	Summer	Control	287	2135.835424	0	0	0	0	2.13583542	0	-87.16	30.45725337	5.83606	11.95409966	30.46780014	2.52082992	0.300468	0	5346.310465	0.19541598	5.779127479	20.46829987	28.45195007	-0.056932521	8.514200206	-2.015850067	0.24665175	0.022073775	0	0.060795926
288	Control Summer	Summer	Control	288	3151.23024	0	0	0	0	3.15123024	0	-87.15	30.45726582	5.8156099	12.41569996	30.5848999	4.29640007	0.0899158	617.04138	5992.324621	0.0356734	5.694927454	21.3194499	28.36514997	-0.120682446	8.903749942	-2.219749925	0.245369751	0.02191175	0	0.126718773
289	Control Summer	Summer	Control	289	2755.85303	0	0	0	0	2.75585303	0	-87.14	30.45727744	5.7962899	13.10820007	30.60630035	3.9700799	0.0459451	1573.870955	6725.538874	0.02538688	5.360470176	22.6637001	28.23092508	-0.435819724	9.555500034	-2.375375267	0.242517248	0.021547725	0	0.032754338
290	Control Summer	Summer	Control	290	479.9374684	0	0	0	0	0.47993747	0	-87.13	30.45728822	5.7786298	13.82330036	30.58769989	3.77517009	0.0158474	2123.106799	6658.638979	0.01278546	5.457117438	22.48220015	28.3279748	-0.321512362	8.658899786	-2.259725094	0.239164751	0.020994701	0	0.018445033
291	Control Summer	Summer	Control	291	0	0	0	0	0	0	0	-87.12	30.45729818	5.7646098	14.43340015	30.60479927	3.40666008	0.0470475	1144.682311	6360.467619	0.01926987	5.82960248	21.02347422	28.64274979	0.06499268	6.590074066	-1.962049484	0.236818753	0.020388	0	0.066300037
292	Control Summer	Summer	Control	292	1.00193296	0	0	0	0	0.00100193	0	-87.11	30.4573073	5.7556701	14.95219994	30.66449928	2.36178994	0.0904619	228.050299	6210.766749	0.03306712	5.842422485	19.67692518	28.97227478	0.086752385	4.724725242	-1.6922245	0.23533475	0.0198667	0	0.136539874
293	Control Summer	Summer	Control	293	0	0	0	0	0	0	0	-87.1	30.4573156	6.2297902	5.25061989	28.43050003	0.63345498	0.0959281	0	6195.092881	0.08639058	5.698430061	19.29050064	29.03930092	-0.531360139	14.03988075	0.608800889	0.378579505	0.030499251	0	0.007024656
294	Control Summer	Summer	Control	294	0	0	0	0	0	0	0	-87.07	30.45733549	6.0859699	7.93710995	28.62389946	0.435552	0.0508696	0	6697.558724	0.06201196	6.033034801	18.94740009	29.77434921	-0.052935099	11.01029014	1.150449753	0.426356509	0.0288414	0	0.005602583
295	Control Summer	Summer	Control	295	3791.249302	0	0	0	0	3.7912493	0	-87.06	30.45734045	5.7894301	14.09939957	29.63710022	2.15582991	0.0918023	387.4562288	7136.275474	0.08073431	6.032187462	18.97392464	29.74350023	0.242757362	4.874525067	0.106400013	0.342450753	0.01695505	0	0.01719317
296	Control Summer	Summer	Control	296	1464.083023	0	0	0	0	1.46408302	0	-87.04	30.45734789	5.8010001	14.25450039	29.76110077	1.63759995	0.00732161	2291.017008	7674.620078	0.00409027	6.043319941	18.99889994	29.69382524	0.242319841	4.744399547	-0.067275525	0.358439498	0.018842675	0	0.000912608
297	Control Summer	Summer	Control	297	2402.579875	0	0	0	0	2.40257988	0	-87.03	30.45735036	5.8049102	14.53909969	29.88369942	1.70904005	0.00867947	3232.419358	7526.59186	0.00212301	6.040442467	19.03112459	29.66022539	0.235532267	4.492024902	-0.223474029	0.370433003	0.020073	0	0.000298087
298	Control Summer	Summer	Control	298	112.7067122	0	0	0	0	0.11270671	0	-87.02	30.457352	5.80756	14.98040009	30.04400063	1.84954	0.00980609	3526.038157	7364.531166	0.00157043	6.037327528	19.05942488	29.6321497	0.229767528	4.079024787	-0.411850934	0.379706249	0.021116925	0	0.000291879
299	Control Summer	Summer	Control	299	3662.922469	0	0	0	0	3.66292247	0	-87	30.45735281	5.8092098	15.56120014	30.23789978	1.97249997	0.00832889	2944.424177	7196.531923	0.00206662	6.034624934	19.08250046	29.60965014	0.225415134	3.521300318	-0.628249645	0.386066005	0.021883675	0	0.001044311
300	Control Summer	Summer	Control	300	103.3572193	0	0	0	0	0.10335722	0	-86.99	30.45735279	5.8101602	16.20289993	30.46069908	2.12283993	0.0107686	2324.646429	6995.399598	0.00112729	6.03260994	19.10004997	29.59245014	0.22244974	2.897150043	-0.868248938	0.389995493	0.022369125	0	0.003708714
301	Control Summer	Summer	Control	301	203.4954808	0	0	0	0	0.20349548	0	-86.98	30.45735193	5.8106699	16.61520004	30.7064991	2.27231002	0.00722733	1683.634592	6826.605867	0.00287754	6.031272531	19.11274958	29.57969999	0.220602631	2.497549537	-1.126799107	0.392259002	0.0226286	0	0.012677181
302	Control Summer	Summer	Control	302	3486.316622	0	0	0	0	3.48631662	0	-86.97	30.45735025	5.8109198	16.27639961	30.95330048	2.19109011	0.0151905	1118.836549	6623.850684	0.00438203	6.030477405	19.12164974	29.57044983	0.219557605	2.845250132	-1.382850651	0.393534996	0.0227431	0	0.035976882
303	Control Summer	Summer	Control	303	439.2041885	0	0	0	0	0.43920419	0	-86.96	30.45734773	5.81106	15.78250027	31.15730095	1.96136999	0.0242664	635.4930187	6426.069028	0.01917893	6.030014992	19.12790012	29.5636754	0.218954992	3.345399854	-1.593625546	0.394290999	0.0227827	0	0.071086657
304	Control Summer	Summer	Control	304	3703.014379	0	0	0	0	3.70301438	0	-86.95	30.45734438	5.81112	16.17740059	31.29100037	1.67507005	0.0797528	221.2414002	6322.353275	0.05287366	6.029639959	19.1322999	29.55892515	0.218519959	2.95489931	-1.732075218	0.394790247	0.022784975	0	0.088451575
305	Control Summer	Summer	Control	305	4980.02825	0	0	0	0	4.98002825	0	-86.94	30.4573402	5.8111401	15.76150036	31.36930084	1.20906997	0.15115	0	6281.169278	0.09194578	6.029753876	19.13363991	29.55709991	0.218613776	3.372139548	-1.812200925	0.394916201	0.02279372	0	0.085952836
306	Control Summer	Summer	Control	306	3592.130472	8	1	0	1	3.59213047	0.278386325	-86.93	30.45733518	5.9555402	11.73840046	30.43230057	1.09683001	0.166921	0	6226.052023	0.08780467	6.029242635	19.13590002	29.55522537	0.073702435	7.397499561	-0.877075198	0.395211503	0.0227646	1	0.012209894
307	Control Summer	Summer	Control	307	785.2571714	0	0	0	0	0.78525717	0	-86.92	30.45732934	6.24438	5.20671988	28.53199959	0.76658201	0.0823474	0	6088.383373	0.07327469	6.029280186	19.13599968	29.55500031	-0.215099814	13.9292798	1.023000715	0.490992732	0.036101175	0	0.008185951
308	Control Summer	Summer	Control	308	0	0	0	0	0	0	0	-87.16	30.4662773	6.1054301	6.08327007	28.96559906	0.69028401	0.117349	0	6180.969017	0.1200966	6.475324869	18.49030018	28.74559975	0.369894769	12.40703011	-0.219999313	0.407596499	0.03346735	0	0.002014185
309	Control Summer	Summer	Control	309	0	0	0	0	0	0	0	-87.15	30.46628976	5.8103099	12.30819988	30.74020004	3.23744011	0.12915	377.843646	6747.540053	0.12106728	6.401662469	19.78617525	28.60382557	0.591352569	7.477975371	-2.136374471	0.249154996	0.022039	0	0.110529651
310	Control Summer	Summer	Control	310	418.8202294	0	0	0	0	0.41882023	0	-87.14	30.46630138	5.7969499	13.18200016	30.66419983	3.68017006	0.0149951	1377.843646	6227.882311	0.0204694	6.354982495	21.07765007	28.48572493	0.558032595	7.89564991	-2.178474904	0.246417001	0.02173125	0	0.048768077
311	Control Summer	Summer	Control	311	2701.198397	0	0	0	0	2.7011984	0	-87.13	30.46631217	5.7835002	14.18669987	30.61160088	3.58347988	0.0272868	2377.843646	5739.97276	0.0207025	6.371857405	21.37712479	28.52525043	0.588357205	7.190424916	-2.086350445	0.242922999	0.02125495	0	0.011787323
312	Control Summer	Summer	Control	312	3545.983307	0	0	0	0	3.54598331	0	-87.12	30.46632213	5.7718301	15.1274004	30.70960045	3.31924009	0.0482792	1521.020266	5391.230154	0.01569491	6.375602484	20.58957529	28.73227501	0.603772384	5.462174891	-1.977325441	0.240498997	0.020745625	0	0.034747965
313	Control Summer	Summer	Control	313	3768.739392	0	0	0	0	3.76873939	0	-87.11	30.46633126	5.7635598	16.08839989	30.93950081	2.71881008	0.0384101	589.3733168	5213.773859	0.01185526	5.939979911	19.65984964	28.93812466	0.176420111	3.571449754	-2.001376153	0.238709748	0.020312175	0	0.107464974
314	Control Summer	Summer	Control	314	685.7468961	0	0	0	0	0.6857469	0	-87.1	30.46633956	6.0736299	9.31064987	29.39220047	1.06746995	0.141524	0	5195.092881	0.10664376	5.538995028	19.23120022	29.00405025	-0.534634872	9.920550348	-0.388150215	0.379651237	0.030628626	0	0.017782751
315	Control Summer	Summer	Control	315	0	0	0	0	0	0	0	-87.07	30.46635945	6.0895801	7.84361982	28.59029961	0.36144099	0.0284284	0	5784.727777	0.02694803	6.019899845	19.01300049	29.71699905	-0.069680255	11.16938067	1.126699444	0.479490496	0.03512865	0	0.006293466
316	Control Summer	Summer	Control	316	1077.856078	0	0	0	0	1.07785608	0	-87.06	30.46636442	5.79459	13.93220043	29.56509972	1.94326997	0.130668	70.293681	6286.419962	0.10295941	6.013520002	19.0536499	29.67852449	0.218930002	5.121449472	0.113424774	0.369176999	0.017565275	0	0.023423642
317	Control Summer	Summer	Control	317	467.8522126	0	0	0	0	0.46785221	0	-87.05	30.46636856	5.7985702	13.99330044	29.6012001	2.06813002	0.0431587	1006.494447	6897.346527	0.0167103	6.01089251	19.08065033	29.65032482	0.21232231	5.08734989	0.049124721	0.379749246	0.018118425	0	0.007672627
318	Control Summer	Summer	Control	318	3396.845856	0	0	0	0	3.39684586	0	-87.04	30.46637186	5.8021598	14.15789986	29.67760086	1.77941	0.0178997	1914.089299	7434.089612	0.00514378	6.018604994	19.07310009	29.64640045	0.216445194	4.91520023	-0.031200408	0.3787205	0.018812975	0	0.001632014
319	Control Summer	Summer	Control	319	0	0	0	0	0	0	0	-87.03	30.46637434	5.8050599	14.43970013	29.7935009	1.84551001	0.0136637	2812.866821	7204.941879	0.00158081	6.018224955	19.09472513	29.62139988	0.213165055	4.655025002	-0.172101021	0.387228251	0.019739625	0	0.000542979
320	Control Summer	Summer	Control	320	3005.121095	0	0	0	0	3.00512109	0	-87.02	30.46637598	5.8071599	14.84500027	29.94709969	1.96442997	0.00695828	2629.379568	7021.533431	0.0040893	6.018542409	19.11112452	29.60175037	0.211382509	4.266124246	-0.345349316	0.392849244	0.020583825	0	0.000987228
321	Control Summer	Summer	Control	321	922.876562	0	0	0	0	0.92287656	0	-87	30.46637678	5.8085799	15.37440014	30.13570023	1.96345997	0.00782951	2172.244066	6975.278182	0.00417745	6.019567609	19.12229967	29.58722496	0.210987709	3.747899531	-0.54847527	0.395740748	0.0212728	0	0.002575538
322	Control Summer	Summer	Control	322	3876.929549	0	0	0	0	3.87692955	0	-86.98	30.46637591	5.8101301	16.45610046	30.58909988	2.18922997	0.0155566	920.6163565	7075.142782	0.01163905	6.022872567	19.13257504	29.56992483	0.212742467	2.676474575	-1.019175049	0.396698505	0.02213195	0	0.024382843
323	Control Summer	Summer	Control	323	144.2614834	0	0	0	0	0.14426148	0	-86.97	30.46637422	5.8105402	16.49990082	30.82920074	1.92624998	0.064338	275.8368044	7302.681759	0.06994157	6.024734974	19.13397503	29.56522512	0.214194774	2.634074209	-1.263975616	0.396267504	0.022370975	0	0.051505178
324	Control Summer	Summer	Control	324	0	0	0	0	0	0	0	-86.96	30.4663717	5.8108401	16.25690079	31.05610085	1.05735004	0.0937906	0	7418.394606	0.06445536	6.026559989	19.13433329	29.56173325	0.215719889	2.877432503	-1.494367604	0.427536242	0.027049025	0	0.086323139
325	Control Summer	Summer	Control	325	0	0	0	0	0	0	0	-86.95	30.46636835	6.0999599	8.94705009	29.43099976	0.69601899	0.0386721	0	7319.645529	0.02532981	6.028240204	19.13439941	29.55879974	-0.071719696	10.18734932	0.127799984	0.491002478	0.036083525	0	0.017645902
326	Control Summer	Summer	Control	326	0	0	0	0	0	0	0	-87.16	30.47530123	5.9611602	8.72025967	29.92959976	0.73506302	0.0772855	0	6681.267693	0.05040825	6.398955107	19.00020027	28.65400028	0.437794907	10.2799406	-1.275599478	0.409787245	0.033390475	0	0.007125322
327	Control Summer	Summer	Control	327	3298.056046	8	0	0	1	3.29805605	0.303208916	-87.15	30.47531369	5.8124099	11.97299957	30.82089996	1.98561001	0.0927103	393.2506177	6078.228058	0.07225525	6.464232326	19.68470001	28.6534996	0.651822426	7.711700442	-2.167400357	0.254206494	0.022174725	1	0.032688049
328	Control Summer	Summer	Control	328	2563.6317	0	0	0	0	2.5636317	0	-87.14	30.47532532	5.80336	13.08959961	30.62339973	2.77927995	0.079088	1272.135899	5416.787763	0.02410009	6.572451973	20.3444603	28.67154045	0.769091973	7.254860687	-1.951859279	0.252287	0.02195236	0	0.038966439
329	Control Summer	Summer	Control	329	381.8377259	0	0	0	0	0.38183773	0	-87.13	30.47533611	5.7923698	14.36439991	30.54240036	2.87251997	0.0473984	1927.139053	4851.962903	0.00388429	6.651612401	20.53994989	28.71392441	0.859242601	6.175549984	-1.828475952	0.248102997	0.021555775	0	0.015927861
330	Control Summer	Summer	Control	330	1150.55952	0	0	0	0	1.15055952	0	-87.12	30.47534608	5.78158	15.47560024	30.73430061	2.53882003	0.0581365	1597.658791	4435.670953	0.00580184	6.466437578	20.05305004	28.87370014	0.684857578	4.577449801	-1.860600468	0.24552675	0.0211416	0	0.024395482
331	Control Summer	Summer	Control	331	402.8868148	0	0	0	0	0.40288681	0	-87.11	30.47535521	5.7725401	16.75419998	31.10820007	2.07954001	0.0440155	679.6288076	4218.204842	0.01705438	5.99672246	19.35282469	29.02559996	0.22418236	2.598624708	-2.082600113	0.24333375	0.0207656	0	0.068609727
332	Control Summer	Summer	Control	332	2547.438126	2	0	0	1	2.54743813	0.392551241	-87.1	30.47536351	6.07727	9.81210041	29.53879929	1.17375004	0.114321	0	4195.092881	0.08671425	5.619813442	18.87753296	29.10966682	-0.457456558	9.065432549	-0.429132466	0.312216498	0.02571805	1	0.012859711
333	Control Summer	Summer	Control	333	1210.646471	0	0	0	0	1.21064647	0	-87.06	30.47538838	5.7986999	13.74409962	29.55450058	1.12504005	0.143858	0	5487.415079	0.1029453	6.002109845	19.11219978	29.62740008	0.203409945	5.368100163	0.0728995	0.424891002	0.023844975	0	0.017361582
334	Control Summer	Summer	Control	334	3868.837888	0	0	0	0	3.86883789	0	-87.05	30.47539252	5.8009901	13.79640007	29.58569908	2.30005002	0.0332349	576.9096381	6177.866737	0.0141691	5.99888742	19.13535023	29.60514975	0.19789732	5.338950157	0.019450666	0.402598247	0.01844055	0	0.019415
335	Control Summer	Summer	Control	335	0	0	0	0	0	0	0	-87.04	30.47539582	5.8032498	13.95149994	29.65130043	2.03068995	0.011342	1522.459176	6434.089612	0.00570436	6.00316	19.12912464	29.60540056	0.1999102	5.177624701	-0.045899868	0.399465248	0.01886905	0	0.004251324
336	Control Summer	Summer	Control	336	2177.668289	0	0	0	0	2.17766829	0	-87.03	30.4753983	5.8052402	14.21339989	29.75139999	1.98570001	0.00654323	2180.635551	6241.845169	0.00331592	6.003987551	19.14225006	29.58862448	0.198747351	4.928850171	-0.162775513	0.404910751	0.01952755	0	0.001771583
337	Control Summer	Summer	Control	337	2457.62181	0	0	0	0	2.45762181	0	-87.02	30.47539994	5.8068099	14.58920002	29.88669968	1.93173003	0.00941541	1739.13118	6029.210177	0.00425241	6.006227493	19.14922476	29.57702494	0.199417593	4.560024738	-0.309674743	0.406778246	0.02019005	0	0.004052721
338	Control Summer	Summer	Control	338	204.675326	0	0	0	0	0.20467533	0	-87	30.47540075	5.8080101	15.08290005	30.05739975	1.86198997	0.013939	1307.526129	5975.278182	0.01206641	6.009525061	19.15082502	29.56997442	0.201514961	4.067924974	-0.487425328	0.405715249	0.02080325	0	0.00865646
339	Control Summer	Summer	Control	339	3398.852423	0	0	0	0	3.39885242	0	-86.99	30.47540072	5.8089399	15.64939976	30.2548008	1.99040997	0.036362	763.5028467	5978.397027	0.021807	6.013352394	19.14887476	29.56615019	0.204412494	3.499475	-0.688650612	0.403327249	0.0213236	0	0.021772042
340	Control Summer	Summer	Control	340	483.1740561	0	0	0	0	0.48317406	0	-86.98	30.47539987	5.8096399	16.17320061	30.47299957	1.91821003	0.0995087	125.3455296	6090.792426	0.08988224	6.017114997	19.14527464	29.56437492	0.207475097	2.972074029	-0.908624646	0.400863998	0.021729075	0	0.038065434
341	Control Summer	Summer	Control	341	0	0	0	0	0	0	0	-86.97	30.47539818	5.9548602	12.78750038	29.92420006	0.72891998	0.081355	0	6348.207356	0.07134361	6.020516713	19.14129957	29.56346703	0.065656513	6.353799186	-0.360733034	0.429862492	0.026667775	0	0.02587342
342	Control Summer	Summer	Control	342	0	0	0	0	0	0	0	-87.16	30.48432514	6.24365	3.06799006	28.11450005	0.66969103	0.0711097	0	5693.681269	0.08274498	6.251080036	19.73649979	28.6385994	0.007430036	16.66850973	0.524099346	0.48809775	0.038722524	0	0.000653121
343	Control Summer	Summer	Control	343	3410.812271	0	0	0	0	3.41081227	0	-87.15	30.48433761	5.8215799	11.06669998	30.61520004	1.77702999	0.085408	0	5381.620569	0.07610044	6.265372515	19.90047503	28.75127506	0.443792615	8.833775045	-1.863924977	0.260315001	0.0222965	0	0.123039728
344	Control Summer	Summer	Control	344	3392.756491	0	0	0	0	3.39275649	0	-87.14	30.48434924	5.8159499	12.46440029	30.35490036	1.98662996	0.0293001	536.8648444	4665.4455	0.0120987	6.292397499	20.0095253	28.85509968	0.476447599	7.545125009	-1.499800682	0.260289505	0.02220135	0	0.081048118
345	Control Summer	Summer	Control	345	4047.583297	0	0	0	0	4.0475833	0	-87.13	30.48436004	5.80582	14.02460003	30.36870003	2.19473004	0.0297665	1504.139006	4013.832959	0.00747865	6.424484968	20.07892513	28.88762522	0.618664968	6.054325103	-1.481074813	0.254582249	0.021849351	0	0.021285929
346	Control Summer	Summer	Control	346	2653.646141	3	0	0	1	2.65364614	0.376839996	-87.12	30.48437001	5.7948599	15.11219978	30.67849922	1.95504999	0.0253479	1446.246178	3504.995156	0.0135123	6.257392526	19.66975021	29.01985025	0.462532626	4.557550434	-1.658648966	0.251816254	0.02152165	1	0.013393566
347	Control Summer	Summer	Control	347	2648.199509	0	0	0	0	2.64819951	0	-87.11	30.48437914	5.7848101	16.43000031	31.08239937	1.80217004	0.0172624	446.3365939	3225.378478	0.02948311	5.944710016	19.0862999	29.12572479	0.159899916	2.656299586	-1.956674578	0.24929275	0.021209025	0	0.062862977
348	Control Summer	Summer	Control	348	548.4802032	0	0	0	0	0.5484802	0	-87.1	30.48438744	6.0827498	9.65530968	29.5170002	0.87588203	0.0941852	0	3195.092881	0.06713877	5.718109846	18.64280033	29.19405079	-0.364639954	8.987490651	-0.322949411	0.384599995	0.031067424	0	0.018352981
349	Control Summer	Summer	Control	349	0	0	0	0	0	0	0	-87.06	30.48441232	6.09448	7.59204006	28.59790039	0.49869299	0.0955503	0	4764.91055	0.10343394	5.994880199	19.15530014	29.5883007	-0.099599801	11.56326008	0.990400315	0.494377755	0.035440275	0	0.004484259
350	Control Summer	Summer	Control	350	2354.173677	0	0	0	0	2.35417368	0	-87.05	30.48441646	5.80268	13.4612999	29.59679985	1.96123004	0.0396804	260.3021604	5445.186336	0.03521869	5.9921875	19.17544985	29.56900024	0.1895075	5.714149948	-0.027799606	0.424239248	0.01865465	0	0.026248146
351	Control Summer	Summer	Control	351	894.546634	0	0	0	0	0.89454663	0	-87.04	30.48441977	5.80405	13.58549976	29.64949989	2.08526993	0.00998551	1183.579056	5434.089612	0.00472079	5.993581963	19.17431984	29.56795998	0.189531963	5.588820079	-0.081539914	0.423116791	0.0188948	0	0.008929695
352	Control Summer	Summer	Control	352	3928.498255	0	0	0	0	3.92849826	0	-87.03	30.48442224	5.8053498	13.83409977	29.72960091	1.94946003	0.0158934	1263.748191	5292.454511	0.00585715	5.995679975	19.17657471	29.56195021	0.190330175	5.342474937	-0.167650703	0.423423	0.019351651	0	0.0080072
353	Control Summer	Summer	Control	353	508.2139203	0	0	0	0	0.50821392	0	-87.02	30.48442389	5.8064899	14.2208004	29.84189987	1.83140004	0.0088117	860.7055034	5039.922519	0.00593512	5.998827457	19.17607498	29.55755043	0.192337557	4.955274582	-0.28434944	0.421290249	0.019875475	0	0.015705576
354	Control Summer	Summer	Control	354	3334.69487	0	0	0	0	3.33469487	0	-87	30.4844247	5.8075299	14.74510002	29.99360085	1.98670995	0.0736608	393.3138288	4975.278182	0.07037526	6.003422499	19.1697998	29.55762482	0.195892599	4.424699785	-0.435976033	0.415334001	0.020445825	0	0.022521019
355	Control Summer	Summer	Control	355	1204.415649	0	0	0	0	1.20441565	0	-86.99	30.48442467	5.8084502	15.32330036	30.17289925	1.37336004	0.139082	0	4978.975636	0.10568873	6.008567572	19.16127539	29.55935001	0.200117372	3.837975027	-0.613549236	0.409159996	0.02098525	0	0.024747953
356	Control Summer	Summer	Control	356	0	0	0	0	0	0	0	-86.98	30.48442382	6.2439399	5.25249004	28.29380035	0.431115	0.0537305	0	5112.519864	0.08479622	6.013226668	19.15326691	29.56126658	-0.230713232	13.90077687	1.267466231	0.43412149	0.0261993	0	0.007096754
357	Control Summer	Summer	Control	357	2028.352124	0	0	0	0	2.02835212	0	-87.15	30.49336151	5.98315	6.05077982	29.52930069	1.48539996	0.12704299	0	4777.119414	0.07702799	5.934159994	19.52010012	29.03980017	-0.048990006	13.4693203	-0.489500523	0.271336503	0.0224921	0	0.146932288
358	Control Summer	Summer	Control	358	7966.130666	6	1	0	2	7.96613067	0.251062917	-87.14	30.49337315	5.8359299	10.04440022	30.26790047	1.81886005	0.0197707	487.0605843	3971.084445	0.01408811	5.947924972	19.5498004	29.07847548	0.111995072	9.505400176	-1.189424995	0.269079	0.02239305	1	0.039683396
359	Control Summer	Summer	Control	359	44.19777028	0	0	0	0	0.04419777	0	-87.13	30.49338395	5.82409	12.60210037	30.35910034	1.90207005	0.0101458	1487.060584	3253.906438	0.00452805	6.098784924	19.67635012	29.06617498	0.274694924	7.074249747	-1.292925356	0.26214426	0.022105175	0	0.030356052
360	Control Summer	Summer	Control	360	0	0	0	0	0	0	0	-87.12	30.49339392	5.8119998	14.02830029	30.66740036	1.82122004	0.00448836	1446.205827	2622.602644	0.00396113	6.001312494	19.38317537	29.14972544	0.189312694	5.354875083	-1.517674923	0.259014502	0.021845275	0	0.032123828
361	Control Summer	Summer	Control	361	0	0	0	0	0	0	0	-87.11	30.49340306	5.8008499	15.35169983	30.96109962	1.78039002	0.0345795	446.2058265	2238.946306	0.04509078	5.725657463	18.88557482	29.17145014	-0.075192437	3.533874988	-1.789649482	0.256229751	0.0215951	0	0.050837433
362	Control Summer	Summer	Control	362	0	0	0	0	0	0	0	-87.1	30.49341137	6.09023	9.05933952	29.40390015	0.54635102	0.0877279	0	2195.092881	0.06741689	5.442159891	18.55460072	29.12580013	-0.648070109	9.495261196	-0.278100017	0.388021499	0.031268475	0	0.014637542
363	Control Summer	Summer	Control	363	2106.289124	0	0	0	0	2.10628912	0	-87.05	30.4934404	5.8037901	12.92450047	29.60770035	1.39697003	0.103692	0	4447.681981	0.05167258	5.989069939	19.2033666	29.5414664	0.185279839	6.278866127	-0.066233955	0.462717488	0.024334474	0	0.028244497
364	Control Summer	Summer	Control	364	4750.735065	0	0	0	0	4.75073507	0	-87.04	30.4934437	5.8045702	12.98460007	29.64439964	2.28221011	0.0259704	666.7494724	4434.089612	0.01121068	5.989442468	19.20574999	29.53807497	0.184872268	6.221149919	-0.10632467	0.445644997	0.01889935	0	0.024054155
365	Control Summer	Summer	Control	365	1742.416017	0	0	0	0	1.74241602	0	-87.03	30.49344618	5.8053699	13.26369953	29.70569992	1.92268002	0.0393173	561.97932	4365.720832	0.02482989	5.991357446	19.2017746	29.53962564	0.185987546	5.938075067	-0.166074275	0.443193257	0.019175875	0	0.021399094
366	Control Summer	Summer	Control	366	2220.580859	0	0	0	0	2.22058086	0	-87.02	30.49344782	5.80616	13.76220036	29.79680061	1.34022999	0.0657428	0	4055.892335	0.03484399	5.99466002	19.19554996	29.54164982	0.18850002	5.433349605	-0.255150792	0.436812006	0.0195973	0	0.035749804
367	Control Summer	Summer	Control	367	0	0	0	0	0	0	0	-87	30.49344863	6.0980601	8.11740971	28.7833004	0.75212699	0.0625279	0	3975.278182	0.04336097	5.999673208	19.18226624	29.5491333	-0.098386892	11.06485653	0.765832901	0.449091241	0.025243075	0	0.020110688
368	Control Summer	Summer	Control	368	151.1407971	0	0	0	0	0.1511408	0	-87.15	30.50238541	5.8738198	7.60964012	29.9654007	2.16069007	0.0811095	278.3909119	3971.621345	0.06836243	5.630772591	18.9734745	29.25005007	-0.243047209	11.36383438	-0.715350632	0.280199751	0.022624925	0	0.170539655
369	Control Summer	Summer	Control	369	2394.348742	0	0	0	0	2.39434874	0	-87.14	30.50239705	5.8594398	8.78596973	30.34659958	2.16285992	0.0316213	886.6384851	3403.570473	0.00913332	5.601654887	18.96729994	29.29080009	-0.257784913	10.18133021	-1.055799485	0.277732752	0.02253065	0	0.153359271
370	Control Summer	Summer	Control	370	3091.394276	0	0	0	0	3.09139428	0	-87.13	30.50240785	5.8453002	11.22729969	30.55620003	1.87641001	0.00992257	1661.399703	2564.601996	0.00558066	5.718589902	19.10662508	29.27027512	-0.126710298	7.87932539	-1.285924914	0.270217001	0.0223017	0	0.040138185
371	Control Summer	Summer	Control	371	3127.016057	0	0	0	0	3.12701606	0	-87.12	30.50241783	5.8315001	12.93789959	30.68759918	1.80356002	0.0009836	1455.205762	1841.943738	0.00099906	5.643390059	18.72020006	29.35599995	-0.188110041	5.782300472	-1.331599233	0.266495749	0.022090475	0	0.042017048
372	Control Summer	Summer	Control	372	2610.185279	0	0	0	0	2.61018528	0	-87.11	30.50242697	5.8192902	14.18529987	30.7954998	1.81632996	0.0143706	455.4059493	1273.850383	0.02617169	5.485847473	18.06710005	29.39757538	-0.333442727	3.881800178	-1.397924422	0.263363496	0.021896075	0	0.064345846
373	Control Summer	Summer	Control	373	0	0	0	0	0	0	0	-87.1	30.50243528	6.09904	8.39525986	29.27020073	0.80083299	0.119133	0	1195.092881	0.08610366	5.221806685	17.40593274	29.37586657	-0.877233315	9.010672884	0.105665842	0.327186756	0.026628625	0	0.022729197
374	Control Summer	Summer	Control	374	250.0727757	0	0	0	0	0.25007278	0	-87.05	30.50246432	5.9499002	9.53966999	29.10449982	0.72702998	0.118534	0	3451.622195	0.09009306	5.988184929	19.22805023	29.51445007	0.038284729	9.688380242	0.409950253	0.491548248	0.029925075	0	0.009651993
375	Control Summer	Summer	Control	375	1850.204094	0	0	0	0	1.85020409	0	-87.04	30.50246763	5.8048501	11.89470005	29.60239983	2.38722992	0.0345068	514.7820268	3434.089612	0.03188351	5.988510013	19.22692537	29.51514959	0.183659913	7.332225323	-0.087250237	0.463012002	0.018873975	0	0.031636727
376	Control Summer	Summer	Control	376	2107.029984	0	0	0	0	2.10702998	0	-87.03	30.5024701	5.8052402	11.83899975	29.62140083	1.50068998	0.105841	0	3479.793387	0.07199086	5.989582419	19.22342443	29.5175252	0.184342219	7.384424685	-0.103875634	0.464138001	0.01900675	0	0.028200513
377	Control Summer	Summer	Control	377	0	0	0	0	0	0	0	-87.16	30.51139681	6.0247598	6.44216013	28.67539978	0.74548501	0.108898	0	2736.652545	0.07946597	5.336329937	18.12185001	29.48690033	-0.688429863	11.67968988	0.81150055	0.494208992	0.038140799	0	0.003313561
378	Control Summer	Summer	Control	378	3878.109103	1	0	0	1	3.8781091	0.257857624	-87.15	30.51140929	5.8980999	8.81480026	29.49900055	2.35370994	0.0405786	419.8144241	3056.482682	0.03030566	5.377437592	18.37594986	29.4387002	-0.520662308	9.5611496	-0.060300351	0.288200751	0.0226904	1	0.041847917
379	Control Summer	Summer	Control	379	424.7004693	0	0	0	0	0.42470047	0	-87.14	30.51142093	5.8831501	9.88138962	30.20940018	2.25163007	0.0262802	1381.759797	3043.932911	0.00523258	5.324582577	18.38087511	29.47479963	-0.558567523	8.499485491	-0.734600547	0.285801753	0.02260155	0	0.074432931
380	Control Summer	Summer	Control	380	230.8655677	0	0	0	0	0.23086557	0	-87.13	30.51143174	5.8667102	11.54570007	30.62849998	1.85005999	0.0127278	1411.365663	2079.331635	0.01117228	5.359340072	18.47669983	29.47382498	-0.507370128	6.930999759	-1.154675002	0.278056495	0.022429025	0	0.051483239
381	Control Summer	Summer	Control	381	1488.499164	0	0	0	0	1.48849916	0	-87.12	30.51144172	5.85042	12.63500023	30.60720062	1.79802001	0.00289349	965.4564066	1171.734784	0.00508157	5.297724962	17.91772461	29.60787535	-0.552695038	5.282724379	-0.999325273	0.273535743	0.022253975	0	0.071297428
382	Control Summer	Summer	Control	382	3192.27712	0	0	0	0	3.19227712	0	-87.11	30.51145086	5.8369598	13.40209961	30.54129982	1.77429998	0.0228506	426.1323341	428.4606405	0.02802446	5.386525035	16.89545059	29.76532507	-0.450434765	3.493350982	-0.775974751	0.269518748	0.022092975	0	0.049695687
383	Control Summer	Summer	Control	383	0	0	0	0	0	0	0	-87.1	30.51145917	6.1077399	7.84951019	29.12319946	0.99591303	0.111554	0	195.0928814	0.08252997	5.315922618	16.48230028	29.71682501	-0.791817282	8.632790092	0.593625548	0.267122492	0.021987375	0	0.04400398
384	Control Summer	Summer	Control	384	682.4345805	0	0	0	0	0.68243458	0	-87.05	30.51148823	6.0952802	6.27154016	28.58659935	0.74050599	0.0908503	0	2458.763217	0.05889923	5.988850117	19.2404995	29.49909973	-0.106430083	12.96895934	0.912500381	0.508791506	0.0354555	0	0.008783302
385	Control Summer	Summer	Control	385	1438.883434	0	0	0	0	1.43888343	0	-87.04	30.51149154	5.8050199	10.48419952	29.53070068	2.14960003	0.0468397	298.9952598	2434.089612	0.0355434	5.989289999	19.24412489	29.49420023	0.184270099	8.759925369	-0.03650045	0.473533757	0.0189093	0	0.047228505
386	Control Summer	Summer	Control	386	2060.898115	0	0	0	0	2.06089811	0	-87.03	30.51149401	5.8051801	10.03349972	29.51160049	1.99504006	0.0590243	240.7860518	2520.041361	0.05772964	5.989797592	19.24524975	29.49214983	0.184617492	9.211750028	-0.01945066	0.47682225	0.018943576	0	0.038489906
387	Control Summer	Summer	Control	387	610.9039194	0	0	0	0	0.61090392	0	-87.02	30.51149566	5.8052602	9.53565025	29.48539925	1.08931994	0.050593	0	2132.873627	0.0319268	5.990887523	19.25192499	29.48280001	0.185627323	9.716274742	-0.002599243	0.478555247	0.019000275	0	0.051460859
388	Control Summer	Summer	Control	388	929.5079258	0	0	0	0	0.92950793	0	-87.17	30.52040736	6.1645298	4.74514008	28.05590057	1.31771004	0.0823994	0	1610.665794	0.0291903	5.164790154	17.32435036	29.67310047	-0.999739646	12.57921028	1.617199901	0.429249987	0.03290115	0	0.031936441
389	Control Summer	Summer	Control	389	2953.594777	0	0	0	0	2.95359478	0	-87.16	30.52042067	5.9359598	9.19989014	28.95369911	1.66263998	0.107137	0	1759.66268	0.07620632	5.188694954	17.59439993	29.62470055	-0.747264846	8.394509789	0.671001436	0.29644125	0.022783725	0	0.085694595
390	Control Summer	Summer	Control	390	2076.201543	0	0	0	0	2.07620154	0	-87.15	30.52043316	5.92203	9.7155304	29.3288002	2.07674003	0.0299727	438.2667795	2209.487723	0.01300076	5.195462584	17.82792521	29.59452486	-0.726567416	8.112394805	0.26572466	0.295272246	0.02268065	0	0.1398639
391	Control Summer	Summer	Control	391	2832.099779	0	0	0	0	2.83209978	0	-87.14	30.5204448	5.9061399	10.87069988	30.04610062	2.1373899	0.0203894	800.2845464	2935.097305	0.01018509	5.148312449	17.86329985	29.62152481	-0.757827451	6.992599967	-0.424575809	0.292376749	0.022591825	0	0.098210923
392	Control Summer	Summer	Control	392	3314.752011	3	0	0	1	3.31475201	0.301681694	-87.13	30.52045562	5.8865299	12.20790005	30.55789948	1.81718004	0.0223331	463.0496967	1970.953759	0.01970622	5.116300011	17.88348007	29.65084038	-0.770229889	5.675580022	-0.907059102	0.284858799	0.02247848	1	0.027136155
393	Control Summer	Summer	Control	393	2101.031982	0	0	0	0	2.10103198	0	-87.12	30.5204656	5.8659601	12.73530006	30.49220085	1.57783997	0.0640856	96.8161463	970.9537592	0.04794003	5.122407436	17.18564987	29.82672501	-0.743552664	4.450349812	-0.665475844	0.278295748	0.022317825	0	0.069607961
394	Control Summer	Summer	Control	394	109.796282	0	0	0	0	0.10979628	0	-87.11	30.52047475	5.9836798	10.2439003	29.65390015	1.12284994	0.091887	0	0	0.06960372	5.393242478	16.01749969	30.05117512	-0.590437322	5.773599385	0.397274967	0.335856758	0.026866525	0	0.015508943
395	Control Summer	Summer	Control	395	0	0	0	0	0	0	0	-87.1	30.52048306	6.3856001	1.76955998	27.63339996	0.320611	0.0326501	0	0	0.03727819	5.472380161	15.78989983	30.0182991	-0.913219939	14.02033985	2.384899143	0.459080234	0.03622565	0	0.004810113
396	Control Summer	Summer	Control	396	0	0	0	0	0	0	0	-87.05	30.52051212	6.2397799	3.78599	28.10199928	0.35775101	0.0388409	0	1475.580337	0.03208916	5.990799904	19.25659943	29.47750092	-0.248979996	15.47060943	1.375501636	0.510647006	0.035437075	0	0.007470178
397	Control Summer	Summer	Control	397	2594.199465	0	0	0	0	2.59419947	0	-87.04	30.52051543	5.8051901	9.18050957	29.4605999	1.66588998	0.0985498	0	1434.089612	0.06732925	5.990880013	19.25680017	29.47725058	0.185689913	10.0762906	0.016650676	0.477934003	0.018988975	0	0.043499134
398	Control Summer	Summer	Control	398	1065.9298	0	0	0	0	1.0659298	0	-87.03	30.52051791	5.8052802	8.77420044	29.43919945	1.86543	0.0206151	754.8886372	1575.57267	0.01500509	5.991782427	19.26067495	29.47140074	0.186502227	10.48647451	0.032201288	0.478852749	0.019034325	0	0.036607723
399	Control Summer	Summer	Control	399	1655.7566	0	0	0	0	1.6557566	0	-87.02	30.52051956	5.8053398	8.25405979	29.40749931	1.17208004	0.0631643	0	1264.354992	0.04138695	5.992336591	19.26229986	29.46873347	0.186996791	11.00824007	0.06123416	0.477998503	0.019087625	0	0.059061394
400	Control Summer	Summer	Control	400	1136.82803	0	0	0	0	1.13682803	0	-87.18	30.52941705	5.96631	8.9520998	28.76070023	0.97224998	0.0214601	0	611.4659362	0.01725917	5.158584833	17.06850004	29.71592474	-0.807725167	8.116400242	0.95522451	0.291223504	0.023084975	0	0.114434723
401	Control Summer	Summer	Control	401	2425.947237	0	0	0	0	2.42594724	0	-87.17	30.5294312	5.9621301	9.03147984	28.79910088	1.71352005	0.0533158	296.0170142	610.6657937	0.01768669	5.148939967	17.19140005	29.70025015	-0.813190133	8.159920211	0.901149269	0.29678575	0.02289015	0	0.123258762
402	Control Summer	Summer	Control	402	4422.839351	0	0	0	0	4.42283935	0	-87.16	30.52944452	5.9547701	9.30620956	28.9197998	2.24654007	0.019855	689.1253992	820.5732604	0.01115619	5.137570024	17.35927486	29.68165016	-0.817200076	8.053065304	0.761850362	0.30090975	0.022706425	0	0.104463924
403	Control Summer	Summer	Control	403	3033.786589	0	0	0	0	3.03378659	0	-87.15	30.52945701	5.9440498	9.89050007	29.22999954	2.27708006	0.0118964	1161.853217	1548.92696	0.00687571	5.116482615	17.47082472	29.68107462	-0.827567185	7.580324648	0.451075079	0.301334754	0.022599925	0	0.049946698
404	Control Summer	Summer	Control	404	2384.716142	0	0	0	0	2.38471614	0	-87.14	30.52946866	5.9292898	10.87409973	29.74539948	1.88528001	0.058411	234.5269366	2470.467511	0.03938483	5.083147526	17.5005002	29.7022748	-0.846142274	6.626400472	-0.043124681	0.298905499	0.02253345	0	0.093858686
405	Control Summer	Summer	Control	405	0	0	0	0	0	0	0	-87.13	30.52947948	6.1427999	6.95635986	28.98719978	1.01568997	0.0718189	0	1986.888506	0.05936655	5.047770023	17.52693303	29.73963292	-1.095029877	10.57057317	0.752433144	0.34750025	0.027074775	0	0.051661477
406	Control Summer	Summer	Control	406	0	0	0	0	0	0	0	-87.12	30.52948947	6.2589202	4.48614979	28.34519958	0.70664501	0.038268	0	997.5273958	0.03655576	5.125504971	16.84934998	29.90749931	-1.133415229	12.36320019	1.562299733	0.401280008	0.03160435	0	0.026521183
407	Control Summer	Summer	Control	407	980.0404294	0	0	0	0	0.98004043	0	-87.04	30.52953932	5.9498901	6.51112986	28.95960045	1.03069997	0.0988839	0	434.0896123	0.06877635	5.993201923	19.26958046	29.45908012	0.043311823	12.7584506	0.499479674	0.477958196	0.01909322	0	0.031021027
408	Control Summer	Summer	Control	408	3332.061839	0	0	0	0	3.33206184	0	-87.03	30.5295418	5.8053799	7.60282993	29.36849976	1.78700995	0.0194116	550.3956018	780.5780402	0.01845433	5.993735075	19.27139997	29.45615005	0.188355175	11.66857004	0.087650295	0.477798745	0.01911835	0	0.056487377
409	Control Summer	Summer	Control	409	2232.013713	0	0	0	0	2.23201371	0	-87.02	30.52954344	5.8053999	7.07919979	29.33309937	1.66192997	0.0457841	57.2427082	728.8680426	0.04764775	5.994799972	19.27484989	29.45059967	0.189400072	12.1956501	0.1175003	0.476518996	0.019163825	0	0.079334764
410	Control Summer	Summer	Control	410	193.530765	0	0	0	0	0.19353077	0	-87	30.52954425	5.8054099	6.57736015	29.29750061	0.86080199	0.0318131	0	0	0.01834975	5.995784998	19.27809906	29.44534969	0.190375098	12.70073891	0.147849083	0.4751205	0.01920335	0	0.097757182
411	Control Summer	Summer	Control	411	0	0	0	0	0	0	0	-87.19	30.53842588	6.26333	2.74637008	27.73410034	0.80636299	0.00933433	0	625.5706309	0.00283078	5.162350178	16.99850082	29.7262001	-1.100979822	14.25213074	1.992099764	0.490322508	0.036233901	0	0.010262962
412	Control Summer	Summer	Control	412	953.6507938	0	0	0	0	0.95365079	0	-87.18	30.53844088	5.9707899	8.91670036	28.73900032	0.89302498	0.018502	0	0	0.00848882	5.156087399	17.00212526	29.72797489	-0.814702501	8.085424903	0.988974572	0.290725753	0.023104925	0	0.118629437
413	Control Summer	Summer	Control	413	317.7363086	0	0	0	0	0.31773631	0	-87.17	30.53845504	5.97895	8.67360973	28.72039986	1.12059999	0.0590693	0	0	0.03620871	5.12857008	17.04677486	29.73127508	-0.85037992	8.373165134	1.010875222	0.304876752	0.0226368	0	0.087378066
414	Control Summer	Summer	Control	414	280.8762437	0	0	0	0	0.28087624	0	-87.16	30.53846836	5.9731998	9.04053974	28.8253994	1.95564997	0.055247	307.7128062	352.0174972	0.04407316	5.112632513	17.14419985	29.72447491	-0.860567287	8.103660108	0.899075507	0.307269	0.0225393	0	0.080597443
415	Control Summer	Summer	Control	415	0	0	0	0	0	0	0	-87.15	30.53848085	5.96521	9.57135963	29.04840088	2.27645993	0.019189	1091.204234	1347.995689	0.01489976	5.093025088	17.21907473	29.72625017	-0.872184912	7.647715096	0.677849292	0.307842754	0.02246915	0	0.040752682
416	Control Summer	Summer	Control	416	3617.690819	0	0	0	0	3.61769082	0	-87.14	30.53849251	5.9528999	10.34119987	29.39319992	1.62486005	0.0689203	301.4197185	2347.182389	0.03092905	5.07387495	17.26337528	29.7348752	-0.87902495	6.922175412	0.341675282	0.306213506	0.022442901	0	0.065965631
417	Control Summer	Summer	Control	417	0	0	0	0	0	0	0	-87.13	30.53850333	6.3850398	1.77384996	27.63640022	0.72877997	0.0259469	0	2312.299204	0.01063663	5.06944	17.2587	29.73415	-1.3155998	15.48485004	2.09774978	0.522008255	0.0408782	0	0.003995144
418	Control Summer	Summer	Control	418	0	0	0	0	0	0	0	-87.12	30.53851332	6.3849301	1.77470005	27.63699913	0.479489	0.0109714	0	1541.521861	0.00340448	5.06927	17.234699	29.7419	-1.3156601	15.45999895	2.10490087	0.522036254	0.04086865	0	0.004514055
419	Control Summer	Summer	Control	419	0	0	0	0	0	0	0	-87.04	30.53856319	5.9496899	5.91396999	28.92449951	0.81154001	0.0503838	0	0	0.04197034	5.994926612	19.27743276	29.44743347	0.045236712	13.36346277	0.522933962	0.488357253	0.024568775	0	0.028343975
420	Control Summer	Summer	Control	420	3300.43623	0	0	0	0	3.30043623	0	-87.03	30.53856567	5.8054199	6.7906599	29.31579971	1.31479001	0.0587424	101.3750285	144.5451505	0.02191288	5.99552238	19.27907467	29.44459963	0.19010248	12.48841477	0.128799918	0.476174749	0.01919125	0	0.086295487
421	Control Summer	Summer	Control	421	3822.527451	0	0	0	0	3.82252745	0	-87.02	30.53856732	5.8054099	6.20331001	29.27260017	1.79445004	0.0377091	384.7499488	387.0416651	0.03166475	5.996592522	19.28157473	29.44017506	0.191182622	13.07826472	0.167574886	0.474222496	0.01923385	0	0.07639822
422	Control Summer	Summer	Control	422	1007.140854	0	0	0	0	1.00714085	0	-87	30.53856813	5.8053699	5.64799023	29.22879982	1.11585999	0.0706851	0	0	0.05919714	5.997749925	19.28392553	29.43569994	0.192380025	13.6359353	0.20690012	0.471798249	0.01927835	0	0.063765509
423	Control Summer	Summer	Control	423	0	0	0	0	0	0	0	-87.19	30.5474497	6.3596001	0.71740699	27.41250038	0.64810097	0.00723311	0	622.1056912	0.00347483	5.130517	16.9868	29.740466	-1.2290831	16.26939301	2.32796562	0.556806008	0.0402057	0	0.002423431
424	Control Summer	Summer	Control	424	0	0	0	0	0	0	0	-87.18	30.54746469	6.1114898	5.71103001	28.26199913	0.639063	0.00980529	0	0	0.00468024	5.130517	16.9868	29.740466	-0.9809728	11.27576999	1.47846687	0.55714798	0.040345602	0	0.002403181
425	Control Summer	Summer	Control	425	1495.965339	0	0	0	0	1.49596534	0	-87.17	30.54747886	5.9967198	7.89683008	28.64970016	0.833574	0.0353126	0	0	0.02034543	5.114550114	16.97077465	29.74857473	-0.882169686	9.073944571	1.098874574	0.315797254	0.022272425	0	0.085708868
426	Control Summer	Summer	Control	426	3841.976877	0	0	0	0	3.84197688	0	-87.16	30.54749219	5.9936099	8.2218399	28.6942997	1.87487996	0.0622424	290.6640473	346.0863948	0.02767754	5.104752541	17.00554991	29.7486248	-0.888857359	8.783710008	1.054325102	0.316203244	0.0222494	0	0.09834409
427	Control Summer	Summer	Control	427	1655.187899	0	0	0	0	1.6551879	0	-87.15	30.54750468	5.9857402	8.79615974	28.84009933	2.20676994	0.0590764	240.5389449	1346.086395	0.0696055	5.091727495	17.06274986	29.74827528	-0.894012705	8.266590123	0.90817595	0.314738251	0.0222741	0	0.062336099
428	Control Summer	Summer	Control	428	2380.882617	0	0	0	0	2.38088262	0	-87.14	30.54751635	5.9718199	9.61853027	29.11030006	1.01865005	0.056805	0	1441.88681	0.0610716	5.078447342	17.13417435	29.74774981	-0.893372558	7.515644077	0.637449745	0.311554998	0.0223329	0	0.039425378
429	Control Summer	Summer	Control	429	0	0	0	0	0	0	0	-87.12	30.54753716	6.3794599	1.81413996	27.66559982	0.43051699	0.0109563	0	2322.362278	0.0053179	5.070615	17.2120995	29.74365	-1.3088449	15.39795954	2.07805018	0.523240253	0.040531	0	0.002899211
430	Control Summer	Summer	Control	430	0	0	0	0	0	0	0	-87.11	30.54754632	6.38025	1.8089	27.66160011	0.35121599	0.00232561	0	2048.968166	0.00100656	5.070615	17.2120995	29.74365	-1.309635	15.4031995	2.08204989	0.523027524	0.04058105	0	0.003235728
431	Control Summer	Summer	Control	431	4186.875569	0	0	0	0	4.18687557	0	-87.02	30.54759118	5.94942	4.51411009	28.82679939	1.32555997	0.107612	0	0	0.07902304	5.998236656	19.28536669	29.43330002	0.048816656	14.7712566	0.606500628	0.483767502	0.024655724	0	0.026175428
432	Control Summer	Summer	Control	432	2916.568789	0	0	0	0	2.91656879	0	-87	30.54759199	5.8052402	4.77475977	29.16300011	1.27592003	0.0783855	0	0	0.05369065	5.999207616	19.28640032	29.43069983	0.193967416	14.51164055	0.267699715	0.468315005	0.019332025	0	0.088729079
433	Control Summer	Summer	Control	433	2390.871969	0	0	0	0	2.39087197	0	-87.17	30.55650267	6.0135198	6.43598986	28.69449997	0.86128002	0.0482388	0	0	0.02773219	5.113219976	16.9145751	29.7576499	-0.900299824	10.47858524	1.063149929	0.325273998	0.0219385	0	0.080732713
434	Control Summer	Summer	Control	434	3149.418437	0	0	0	0	3.14941844	0	-87.16	30.556516	6.01402	6.83080006	28.5814991	1.86190999	0.0445375	377.350942	504.0807529	0.02107017	5.10750258	16.92460012	29.75952482	-0.90651742	10.09380006	1.178025722	0.325161994	0.021936125	0	0.103607319
435	Control Summer	Summer	Control	435	3066.556273	0	0	0	0	3.06655627	0	-87.15	30.5565285	6.0077	7.44632006	28.61129951	1.93340003	0.073013	153.0574205	476.9418031	0.06211742	5.100312471	16.95860004	29.75874996	-0.907387529	9.512279984	1.147450452	0.323074006	0.021998075	0	0.073129466
436	Control Summer	Summer	Control	436	0	0	0	0	0	0	0	-87.14	30.55654017	6.3692298	1.88458002	27.71809959	0.71794599	0.0375811	0	441.8868102	0.02671141	5.09965992	16.95599937	29.75979996	-1.26956988	15.07141935	2.041700367	0.47501675	0.035489425	0	0.007955785
437	Control Summer	Summer	Control	437	47.27978962	0	0	0	0	0.04727979	0	-87.02	30.55661503	6.2375202	2.46797991	28.03160095	0.73935598	0.0665757	0	0	0.05711554	5.999869823	19.28709984	29.42889977	-0.237650377	16.81911993	1.397298815	0.508385256	0.035380351	0	0.005331842
438	Control Summer	Summer	Control	438	6921.103624	0	0	0	0	6.92110362	0	-87	30.55661584	5.80509	3.95966005	29.12490082	1.58776999	0.13680901	0	0	0.08741335	6.000635028	19.28742504	29.42735052	0.195545028	15.32776499	0.302449701	0.46409899	0.019383601	0	0.070699515
439	Control Summer	Summer	Control	439	0.25611493	0	0	0	0	0.00025611	0	-86.99	30.55661582	5.8049202	3.31569004	28.99760056	0.60710198	0.024104	0	0	0.04360077	6.000940084	19.28739929	29.42689991	0.196019884	15.97170925	0.42929935	0.4630505	0.0193944	0	0.08737748
440	Control Summer	Summer	Control	440	0	0	0	0	0	0	0	-87.18	30.56551229	5.9875302	4.33718014	28.8118	0.611498	0.0206852	0	0	0.0188871	5.117280126	16.86700058	29.76419926	-0.870250074	12.52982044	0.952399257	0.387606256	0.0255535	0	0.036580375
441	Control Summer	Summer	Control	441	7104.282414	12	2	0	1	7.10428241	0.14076017	-87.17	30.56552646	6.0233002	4.77041006	28.68330002	1.09250998	0.0487681	0	0	0.02552032	5.115472555	16.87462473	29.76362514	-0.907827645	12.10421467	1.080325125	0.335723251	0.021545975	1	0.021111726
442	Control Summer	Summer	Control	442	1102.465968	0	0	0	0	1.10246597	0	-87.16	30.5655398	6.03297	5.22454023	28.38809967	1.74607003	0.033471	709.0403299	547.424998	0.01679915	5.112704992	16.88329935	29.76362514	-0.920265008	11.65875912	1.375525475	0.334548995	0.021588775	0	0.069189726
443	Control Summer	Summer	Control	443	3117.427168	0	0	0	0	3.11742717	0	-87.15	30.56555231	6.1130099	4.9138298	28.21279907	1.66278994	0.0854334	0	0	0.06348071	5.108754873	16.90115023	29.7630496	-1.004255027	11.98732043	1.550250533	0.332277253	0.02166795	0	0.110081903
444	Control Summer	Summer	Control	444	0	0	0	0	0	0	0	-87.14	30.56556398	6.3685298	1.88911998	27.72159958	0.51223803	0.0396739	0	0	0.02015219	5.09966	16.9362	29.76105	-1.2688698	15.04708002	2.03945042	0.525636002	0.0399216	0	0.002210967
445	Control Summer	Summer	Control	445	3424.496573	0	0	0	0	3.42449657	0	-87	30.56563968	5.94907	2.82752991	28.78779984	1.56395996	0.0504899	0	0	0.04953785	6.001543363	19.28733317	29.42609978	0.052473363	16.45980326	0.638299937	0.476309739	0.024735675	0	0.065348771
446	Control Summer	Summer	Control	446	3757.04984	0	0	0	0	3.75704984	0	-86.99	30.56563965	5.95082	2.88630009	28.60390091	1.31090999	0.0833776	0	0	0.07558479	6.002032399	19.28700018	29.42572498	0.051212399	16.40070009	0.821824073	0.459052749	0.0194332	0	0.063702478
447	Control Summer	Summer	Control	447	0	0	0	0	0	0	0	-86.98	30.56563879	6.3886099	1.74902999	27.61770058	0.79100102	0.0270001	0	0	0.01571976	6.002359867	19.2866993	29.42560005	-0.386250033	17.53766931	1.807899472	0.506624728	0.035271075	0	0.009848542
448	Control Summer	Summer	Control	448	0	0	0	0	0	0	0	-87.18	30.57453607	6.0894299	3.49425006	28.40850067	0.71495998	0.0361601	0	0	0.04846115	5.117952347	16.86357498	29.76464987	-0.971477553	13.36932492	1.356149198	0.389955007	0.025363975	0	0.02385931
449	Control Summer	Summer	Control	449	2406.190385	0	0	0	0	2.40619038	0	-87.17	30.57455025	6.0359602	3.74228001	28.23139954	1.09590006	0.068395	0	0	0.06795148	5.117504954	16.86234999	29.76497459	-0.918455246	13.12006998	1.533575054	0.343845494	0.021236425	0	0.069136135
450	Control Summer	Summer	Control	450	2063.175261	0	0	0	0	2.06317526	0	-87.16	30.57456359	6.0506301	3.92988992	27.98180008	1.25211	0.0612098	0	58.4668765	0.03994198	5.115454912	16.86877537	29.76482487	-0.935175188	12.93888545	1.783024787	0.345911749	0.0211567	0	0.132546659
451	Control Summer	Summer	Control	451	344.6507888	0	0	0	0	0.34465079	0	-87.15	30.5745761	6.2852101	2.59220004	27.83309937	0.73027903	0.078385	0	0	0.05359157	5.112909794	16.87960052	29.76429939	-1.172300306	14.28740048	1.931200023	0.480186485	0.035099549	0	0.003168687
452	Control Summer	Summer	Control	452	0	0	0	0	0	0	0	-87.02	30.57466269	6.2372198	1.56520998	28.3987999	1.54493999	0.0342711	0	0	0.0120877	6.00302	19.2859	29.42535	-0.2341998	17.72069002	1.0265501	0.522456005	0.040685101	0	0.009547975
453	Control Summer	Summer	Control	453	7271.92546	1	0	0	1	7.27192546	0.137515161	-87	30.5746635	5.9489899	1.77766001	29.35639954	1.75295997	0.0173171	0	0	0.01299817	6.002869924	19.28620021	29.42543348	0.053880024	17.5085402	0.069033937	0.472390764	0.024770101	1	0.022909794
454	Control Summer	Summer	Control	454	5364.653297	4	2	1	1	5.3646533	0.186405336	-86.99	30.57466348	5.8048401	2.94359994	29.02669907	1.50092995	0.0346296	0	0	0.00825501	6.002662539	19.28647518	29.42545033	0.197822439	16.34287524	0.398751255	0.456543997	0.0194556	1	0.036274792
455	Control Summer	Summer	Control	455	560.4166496	0	0	0	0	0.56041665	0	-86.98	30.57466262	6.2425799	2.14420009	27.90679932	1.00142002	0.0226843	0	0	0.00985815	6.002565145	19.28655052	29.42550087	-0.240014755	17.14235043	1.51870155	0.489918731	0.0299993	0	0.026600602
456	Control Summer	Summer	Control	456	1432.426392	0	0	0	0	1.43242639	0	-87.02	30.5836865	5.9489002	1.17225003	29.8132	1.68966997	0.0487969	0	0	0.05240715	6.003620148	19.28540039	29.42519951	0.054719948	18.11315036	-0.388000491	0.505049497	0.035373401	0	0.011934975
457	Control Summer	Summer	Control	457	1259.809081	0	0	0	0	1.25980908	0	-87	30.58368731	6.2421899	1.59256005	28.32159996	1.28220999	0.052103	0	0	0.03961913	6.003525019	19.28555012	29.42525005	-0.238664881	17.69299007	1.103650093	0.487996481	0.03001725	0	0.016817569
458	Control Summer	Summer	Control	458	0	0	0	0	0	0	0	-87.03	30.59270865	5.94877	1.19755995	29.79490089	0.97379899	0.0257273	0	0	0.01958458	6.003819942	19.28520012	29.42510033	0.055049942	18.08764017	-0.369800563	0.504931256	0.035349426	0	0.008935047
459	Control Summer	Summer	Control	459	1051.657798	0	0	0	0	1.0516578	0	-87.02	30.5927103	5.9505701	1.18462002	29.78479958	1.55452001	0.08446	0	0	0.06476661	6.003747344	19.28527451	29.42514992	0.053177244	18.10065449	-0.359649662	0.452169255	0.019496375	0	0.090905471
460	Control Summer	Summer	Control	460	1981.929258	0	0	0	0	1.98192926	0	-87.03	30.60173243	6.1907802	1.52558994	28.59770012	1.54383004	0.0649164	0	0	0.05766932	6.003880024	19.28520012	29.42510033	-0.186900176	17.75961018	0.827400207	0.504985496	0.035314275	0	0.005053391
461	Control Summer	Summer	Control	461	1095.234972	0	0	0	0	1.09523497	0	-87.02	30.60173408	6.2418599	1.56920004	28.34480095	1.79421997	0.0166876	0	0	0.03830843	6.003880024	19.28520012	29.42510033	-0.237979876	17.71600008	1.080299377	0.505095482	0.0352852	0	0.009330537
462	Control Summer	Summer	Control	462	66.6998269	0	0	0	0	0.06669983	0	-87.03	30.61075621	6.3872399	1.76432002	27.62639999	1.93195999	0.0800793	0	150.0698426	0.06919837	6.00388	19.2852	29.4251	-0.3833599	17.52087998	1.79870001	0.522919759	0.040546025	0	0.00192822
463	Flood Spring	Spring	Flood	1	3871.55445	0	0	0	0	3.87155445	0	-87.39	30.31238712	7.311414838	4.149457574	27.61762476	3.92725779	0.41145306	0	0	0.20759191	19.47582483	29.88907528	25.03289986	12.16441	25.73961771	-2.584724903	0.539722264	0.031528549	0	0.575938607
464	Flood Spring	Spring	Flood	2	3018.35577	0	0	0	0	3.01835577	0	-87.38	30.31241769	6.978072643	4.681857467	27.64754963	2.06493256	0.21934235	0	628.8088888	0.0879758	19.46967506	29.88314962	25.03275013	12.49160242	25.20129216	-2.6147995	0.537454009	0.032362824	0	0.221350152
465	Flood Spring	Spring	Flood	3	1744.14143	0	0	0	0	1.74414143	0	-87.37	30.31244743	6.028854847	6.091735125	27.7197504	1.26757028	0.31511094	0	715.6540366	0.19651646	19.45804977	29.87214994	25.03257513	13.42919493	23.78041482	-2.687175274	0.533107251	0.033890575	0	0.089228883
466	Flood Spring	Spring	Flood	4	0	0	0	0	0	0	0	-87.36	30.31247635	6.423990091	17.86893336	27.61763382	1.44294075	0.3886697	0	881.2624882	0.2714456	19.44286664	29.85863304	25.03283374	13.01887655	11.98969968	-2.584800084	0.508480996	0.035718034	0	0.312675298
467	Flood Spring	Spring	Flood	5	0	0	0	0	0	0	0	-87.32	30.31258374	7.101677418	20.91912508	26.96277475	2.71178954	0.23919581	71.30990894	1680.319984	0.0869475	19.50212479	29.91167545	25.03207493	12.40044737	8.992550373	-1.930699825	0.485496499	0.028710025	0	0.159630785
468	Flood Spring	Spring	Flood	6	0	0	0	0	0	0	0	-87.31	30.31260852	7.116437316	21.44967508	26.8610754	6.2676817	0.64785115	387.2164673	2075.198733	0.32307959	19.51110029	29.91879988	25.03139973	12.39466298	8.469124794	-1.829675674	0.486406758	0.027971175	0	0.177773693
469	Flood Spring	Spring	Flood	7	1259.34246	0	0	0	0	1.25934246	0	-87.39	30.32141109	6.749235034	4.035397589	26.89310026	1.87247754	0.34741351	0	0	0.28843276	11.50466996	14.94350004	24.3673749	4.75543493	10.90810245	-2.525725365	0.714231491	0.030848875	0	0.020505028
470	Flood Spring	Spring	Flood	8	3857.68308	3	0	0	1	3.85768308	0.259222953	-87.38	30.32144167	6.903324842	7.142577529	27.21272469	3.87228347	0.413536	0	0	0.23707631	19.46600056	29.8796258	25.03264999	12.56267571	22.73704827	-2.180074692	0.536143512	0.032848249	1	0.099277507
471	Flood Spring	Spring	Flood	9	4961.7229	0	0	0	0	4.9617229	0	-87.37	30.32147142	5.894742489	11.02164769	26.82277536	4.34450769	0.41251513	0	0	0.24626875	15.46841466	22.3968997	24.69754934	9.573672175	11.37525201	-2.125226021	0.617142752	0.034041	0	0.259270782
472	Flood Spring	Spring	Flood	10	11403.2546	12	4	1	3	11.4032546	0.263082787	-87.36	30.32150035	6.076905012	6.043317497	27.32050037	4.3734973	0.46911507	0	0	0.23698677	19.42510033	29.84227514	25.03275013	13.34819531	23.79895765	-2.287750244	0.519884735	0.038008225	1	0.117543487
473	Flood Spring	Spring	Flood	11	11030.33336	10	3	0	3	11.03033336	0.271977274	-87.35	30.32152844	6.782325029	6.793295026	26.11232471	3.82331232	0.44160549	0	0	0.22194101	19.40327454	29.82429981	25.03385067	12.62094951	23.03100479	-1.078474045	0.509961486	0.040247951	1	0.126733982
474	Flood Spring	Spring	Flood	12	3848.87699	0	0	0	0	3.84887699	0	-87.34	30.32155572	6.07749486	11.92912507	25.41564989	3.98100991	0.29456519	0	265.7184429	0.20463254	19.38877487	29.81434965	25.03565025	13.31128001	17.88522458	-0.379999638	0.504009992	0.040461276	0	0.303577892
475	Flood Spring	Spring	Flood	13	2939.39942	6	2	0	1	2.93939942	0.340205551	-87.33	30.32158216	6.56112353	14.80703354	27.01619975	1.82582267	0.27976602	0	574.5932767	0.22180753	19.40492487	29.83127499	25.03675032	12.84380134	15.02424145	-1.979449431	0.515402496	0.036643574	1	0.101453497
476	Flood Spring	Spring	Flood	14	0	0	0	0	0	0	0	-87.32	30.32160778	6.98663497	15.65139961	26.58504963	1.26599861	0.25758276	0	738.5438228	0.2600931	19.4972496	29.9079504	25.03245068	12.51061463	14.25655079	-1.552598953	0.487433508	0.0282698	0	0.041985521
477	Flood Spring	Spring	Flood	15	0	0	0	0	0	0	0	-87.31	30.32163257	7.035854936	16.75745034	26.60830021	7.03440086	0.71491614	43.12889905	1330.331227	0.34533571	19.49814987	29.90807438	25.03200006	12.46229494	13.15062404	-1.576300144	0.492482252	0.026440375	0	0.34830335
478	Flood Spring	Spring	Flood	16	0	0	0	0	0	0	0	-87.26	30.32172346	5.933080196	6.04798007	27.03394985	1.72212347	0.41062514	0	1984.310045	0.38183565	20.41050053	30.66855049	24.92569923	14.47742033	24.62057042	-2.108250618	0.591105998	0	0	0.028634908
479	Flood Spring	Spring	Flood	17	0	0	0	0	0	0	0	-87.25	30.32174411	5.913403352	4.342869997	26.74983342	2.9577687	0.52338924	0	2128.130712	0.34760791	20.06192493	30.49799967	24.91902542	14.14852158	26.15512967	-1.830808004	0.600641742	0	0	0.090729613
480	Flood Spring	Spring	Flood	18	1476.19976	0	0	0	0	1.47619976	0	-87.24	30.32176394	6.05401504	2.707442522	26.55850029	3.07012573	0.46762284	0	2658.394483	0.23622992	19.44010019	30.15990019	24.89667511	13.38608515	27.45245767	-1.66182518	0.605300769	0	0	0.094114561
481	Flood Spring	Spring	Flood	19	592.91305	0	0	0	0	0.59291305	0	-87.23	30.32178294	6.478554964	2.22597003	26.35700035	1.02383447	0.27916021	0	3406.63795	0.19222157	19.11329937	29.83065033	24.94845009	12.63474441	27.6046803	-1.408550262	0.546635985	0.0161166	0	0.010130998
482	Flood Spring	Spring	Flood	20	0	0	0	0	0	0	0	-87.22	30.32180112	6.96494325	11.86172318	26.13650004	1.19648216	0.3112783	0	3613.791833	0.19300014	17.85609984	29.12685013	24.91365051	10.89115659	17.26512694	-1.222849528	0.548639499	0.01614075	0	0.003159111
483	Flood Spring	Spring	Flood	21	115.48303	0	0	0	0	0.11548303	0	-87.36	30.33052433	5.023475051	1.876752496	24.97837543	0.29150274	0.13345232	0	0	0.19835756	3.526192486	0	23.68517494	-1.497282565	-1.876752496	-1.293200493	0.873758495	0.030974375	0	0.001800527
484	Flood Spring	Spring	Flood	22	2567.87499	0	0	0	0	2.56787499	0	-87.35	30.33055244	5.724960208	2.857535064	25.218575	0.6236768	0.18551183	0	0	0.20910207	3.52363503	0	23.68067503	-2.201325178	-2.857535064	-1.537899971	0.869591013	0.0312377	0	0.001746307
485	Flood Spring	Spring	Flood	23	4136.561	0	0	0	0	4.136561	0	-87.34	30.33057972	6.130172491	5.250747502	25.40847492	2.36687369	0.2981199	0	0	0.17507544	19.38852501	29.81374979	25.03542519	13.25835252	24.56300229	-0.373049736	0.50310798	0.041243225	0	0.088722856
486	Flood Spring	Spring	Flood	24	4707.42976	0	0	0	0	4.70742976	0	-87.33	30.33060617	5.610276699	4.552739978	25.24483363	1.89827895	0.25069247	0	0	0.15251146	19.37622499	29.80649996	25.03757524	13.7659483	25.25375998	-0.207258383	0.499756753	0.040296875	0	0.048343213
487	Flood Spring	Spring	Flood	25	7285.80874	0	0	0	0	7.28580874	0	-87.32	30.3306318	6.355100036	9.448557377	25.73232508	2.37869485	0.30383649	0	51.81321367	0.29300402	19.39212513	29.82512474	25.03967476	13.03702509	20.37656736	-0.692650318	0.498323239	0.029872376	0	0.046363265
488	Flood Spring	Spring	Flood	26	3546.85776	0	0	0	0	3.54685776	0	-87.31	30.3306566	5.839152575	7.397277594	25.37687445	6.7635025	0.63854294	0	1051.813214	0.33885969	19.51542521	29.91760015	25.02869987	13.67627263	22.52032256	-0.348174572	0.503069989	0.021559676	0	0.170519148
489	Flood Spring	Spring	Flood	27	3373.52924	6	1	0	2	3.37352924	0.592850946	-87.3	30.33068057	6.400000095	3	26.75	4.47175647	0.5501377	0	1093.998219	0.31635305	19.90630054	30.2048502	24.98964977	13.50630045	27.2048502	-1.760350227	0.524563491	0.00371037	1	0.046948067
490	Flood Spring	Spring	Flood	28	3603.28616	0	0	0	0	3.60328616	0	-87.29	30.33070372	7.150083383	3.602279981	28.36493365	5.85337106	0.5524363	0	1067.223322	0.35933739	20.33363342	30.52689997	24.94550006	13.18355004	26.92461999	-3.419433594	0.553211311	0	0	0.25420553
491	Flood Spring	Spring	Flood	29	5870.06222	2	1	0	1	5.87006222	0.170355946	-87.28	30.33072603	6.294009924	6.029974937	27.60134983	7.85520679	0.47607941	0	999.5609919	0.38735204	20.51042509	30.67794991	24.92572451	14.21641517	24.64797497	-2.675625324	0.573119	0	1	0.185106743
492	Flood Spring	Spring	Flood	30	4115.8469	0	0	0	0	4.1158469	0	-87.26	30.33074752	6.502820015	8.575062394	26.8352747	9.67980638	0.24850554	82.28127713	984.310045	0.25382192	20.49512529	30.70934963	24.91179991	13.99230528	22.13428724	-1.923474789	0.588197246	0	0	0.435308772
493	Flood Spring	Spring	Flood	31	3066.96492	0	0	0	0	3.06696492	0	-87.25	30.33076819	6.442784905	5.661672473	26.44185019	10.20645409	0.15756276	519.4370152	1249.127791	0.1712021	20.19652462	30.56732464	24.89992523	13.75373971	24.90565217	-1.541924953	0.596700504	0	0	0.597552637
494	Flood Spring	Spring	Flood	32	3630.05645	6	0	0	1	3.63005645	0.27547781	-87.24	30.33078802	6.450667381	2.578247488	26.16927481	8.55841469	0.32359186	612.2119364	2024.460703	0.21614864	19.54684973	30.21472502	24.87605	13.09618235	27.63647753	-1.293224812	0.601784497	0	1	0.198576885
495	Flood Spring	Spring	Flood	33	4679.86822	0	0	0	0	4.67986822	0	-87.23	30.33080703	6.789367437	1.835345	25.9355998	5.2004657	0.34606745	387.4454114	2938.802824	0.13098566	18.39994955	29.57275009	24.82892561	11.61058211	27.73740509	-1.106674194	0.604878247	0	0	0.037676785
496	Flood Spring	Spring	Flood	34	3443.80358	0	0	0	0	3.44380358	0	-87.22	30.33082521	7.203137517	2.681914985	25.85667419	4.58469292	0.20825852	391.4683944	2863.417288	0.12763769	16.64409971	28.5874753	24.7729001	9.440962195	25.90556031	-1.08377409	0.606889993	0	0	0.011297194
497	Flood Spring	Spring	Flood	35	2409.03518	0	0	0	0	2.40903518	0	-87.21	30.33084256	7.61813736	4.308584988	25.85812521	4.53349461	0.14836428	387.3421798	2213.586581	0.09229607	14.48459983	27.3763752	24.73180056	6.866462469	23.06779021	-1.126324654	0.609847978	0	0	0.008249182
498	Flood Spring	Spring	Flood	36	3036.31715	0	0	0	0	3.03631715	0	-87.2	30.33085909	7.966897368	6.423852563	25.79402494	3.11782693	0.25191992	98.57591244	1444.458044	0.1321533	11.59252501	25.7345252	24.68782568	3.625627637	19.31067264	-1.106199265	0.613724738	0	0	0.00433906
499	Flood Spring	Spring	Flood	37	3090.68071	0	0	0	0	3.09068071	0	-87.19	30.33087478	8.085169911	8.200019956	25.21717501	3.23701194	0.29668696	21.43855945	848.9830331	0.17920591	7.840942264	23.59402561	24.63175011	-0.244227648	15.39400566	-0.5854249	0.618030503	0	0	0.006678114
500	Flood Spring	Spring	Flood	38	3371.99401	0	0	0	0	3.37199401	0	-87.18	30.33088966	7.682252526	8.917440057	23.78244972	3.57463928	0.3321694	0	804.904145	0.1556096	5.053725004	22.11745024	24.58187532	-2.628527522	13.20001018	0.799425602	0.61910899	0	0	0.068255932
501	Flood Spring	Spring	Flood	39	983.09223	3	0	0	1	0.98309223	1.017198559	-87.17	30.3309037	6.851480007	8.84897995	21.72586632	2.02560596	0.33561205	0	1026.019936	0.17883003	4.757789969	22.10325003	24.55827522	-2.093690038	13.25427008	2.832408905	0.616952017	0	1	0.249001376
502	Flood Spring	Spring	Flood	40	864.44219	0	0	0	0	0.86444219	0	-87.16	30.33091691	6.362889767	9.302209854	23.34939957	0.7428154	0.2150032	0	1097.212413	0.17724484	5.310470104	22.05099932	24.51623344	-1.052419662	12.74878947	1.166833878	0.617339333	0	0	0.322810609
503	Flood Spring	Spring	Flood	41	0	0	0	0	0	0	0	-87.15	30.3309293	6.937257648	24.0897274	25.63299942	0.99236248	0.22970282	0	581.1805586	0.3104739	6.038939953	22.58230019	24.48629951	-0.898317695	-1.507427216	-1.146699905	0.611666977	0	0	0.000426814
504	Flood Spring	Spring	Flood	42	0	0	0	0	0	0	0	-87.14	30.33094086	6.852574825	29.27184963	25.65320015	2.28427263	0.47515495	0	114.7802189	0.42436563	19.4701004	29.88319969	25.03269958	12.61752558	0.61135006	-0.620500565	0.489354998	0.032299651	0	0.275006238
505	Flood Spring	Spring	Flood	43	226.68814	0	0	0	0	0.22668814	0	-87.32	30.33965581	5.267487526	3.004682511	25.08177519	0.44852883	0.10753664	0	163.361177	0.11944818	7.508037388	7.471300125	24.01297522	2.240549862	4.466617614	-1.068799973	0.773355246	0.029456476	0	0.014712725
506	Flood Spring	Spring	Flood	44	3550.70384	0	0	0	0	3.55070384	0	-87.31	30.33968062	5.66088748	5.843974948	25.31477451	3.66996508	0.46407997	0	1067.612772	0.25462212	19.65759993	30.01800013	25.0125494	13.99671245	24.17402518	-0.302225113	0.511341512	0.0151718	0	0.039738949
507	Flood Spring	Spring	Flood	45	3319.16577	0	0	0	0	3.31916577	0	-87.3	30.3397046	6.484962463	4.34463501	26.54017448	6.23085308	0.49154949	0	249.7708161	0.30319196	20.01375008	30.27622557	24.97394991	13.52878761	25.93159056	-1.566224575	0.52803199	0.00200755	0	0.214957721
508	Flood Spring	Spring	Flood	46	4462.94899	0	0	0	0	4.46294899	0	-87.29	30.33972775	7.668939948	7.518669844	27.70955038	6.53758218	0.378319	27.10168375	67.22332168	0.19720649	20.37512493	30.54157495	24.93112469	12.70618498	23.02290511	-2.778425694	0.549454004	0	0	0.052626657
509	Flood Spring	Spring	Flood	47	3848.24561	0	0	0	0	3.84824561	0	-87.28	30.33975008	7.839982629	13.47375011	27.11224985	7.07560739	0.39751873	37.63778616	0	0.24766935	20.59992552	30.71809959	24.89505005	12.75994289	17.24434948	-2.217199802	0.568891764	0	0	0.003037928
510	Flood Spring	Spring	Flood	48	4091.69701	5	1	1	1	4.09169701	0.244397373	-87.27	30.33977158	7.57358253	11.87535	26.33382463	9.83423942	0.22498336	0	0	0.30259019	20.60095024	30.75607491	24.8659997	13.02736771	18.88072491	-1.467824936	0.582608998	0	1	0.008585187
511	Flood Spring	Spring	Flood	49	789.98382	0	0	0	0	0.78998382	0	-87.25	30.33979225	7.263177514	5.902179956	25.82749987	10.49299903	0.032992	472.8413156	765.7855903	0.01367211	20.30862522	30.61462498	24.84037495	13.04544771	24.71244502	-0.98712492	0.58864975	0	0	0.51894091
512	Flood Spring	Spring	Flood	50	3599.40776	0	0	0	0	3.59940776	0	-87.24	30.33981209	7.15110743	1.868440002	25.47157526	10.02752198	0.07195906	1404.712572	1765.773588	0.02661621	19.68707514	30.27740002	24.81799936	12.53596771	28.40896001	-0.653575897	0.593084484	0	0	0.150199514
513	Flood Spring	Spring	Flood	51	0	0	0	0	0	0	0	-87.23	30.3398311	7.225302458	1.104075998	25.29012489	8.50506926	0.15244875	1387.445411	2765.770264	0.0885842	18.71457481	29.72857523	24.7640748	11.48927236	28.62449923	-0.526050091	0.596761987	0	0	0.022672606
514	Flood Spring	Spring	Flood	52	1695.35117	0	0	0	0	1.69535117	0	-87.22	30.33984929	7.43581748	1.961665034	25.25057507	7.17181471	0.13214259	1390.984308	2111.907013	0.02000713	17.20092487	28.87325048	24.69797468	9.765107393	26.91158545	-0.552600384	0.598091751	0	0	0.006507785
515	Flood Spring	Spring	Flood	53	2636.41592	0	0	0	0	2.63641592	0	-87.21	30.33986665	7.731157541	3.349650025	25.2493248	5.52000142	0.08107429	1306.318962	1450.164871	0.04396255	15.17512488	27.73379993	24.65495014	7.443967342	24.38414991	-0.594374657	0.600927263	0	0	0.001569328
516	Flood Spring	Spring	Flood	54	0	0	0	0	0	0	0	-87.2	30.33988318	8.045722485	4.612085104	25.02584982	5.2969383	0.0645982	1007.868938	807.9671504	0.04138027	12.63897514	26.2941246	24.62119961	4.593252659	21.6820395	-0.404650211	0.605070502	0	0	0.003403901
517	Flood Spring	Spring	Flood	55	2514.11033	0	0	0	0	2.51411033	0	-87.19	30.33989888	8.217635155	5.200217485	24.35354996	5.46058121	0.15700889	205.523387	39.7791991	0.1151687	9.613134861	24.59945011	24.58522511	1.395499706	19.39923263	0.231675148	0.60936299	0	0	0.037123298
518	Flood Spring	Spring	Flood	56	5037.07642	0	0	0	0	5.03707642	0	-87.18	30.33991376	7.770409942	6.029182434	24.08262539	4.76397011	0.26461329	0	0	0.20904099	6.773942471	23.23190022	24.56457472	-0.996467471	17.20271778	0.481949329	0.611756504	0	0	0.0480126
519	Flood Spring	Spring	Flood	57	6182.03611	0	0	0	0	6.18203611	0	-87.17	30.33992781	6.791567445	8.259802461	25.81597471	5.21473979	0.1564265	549.424919	387.5256715	0.09338606	5.777412534	22.82070017	24.54857492	-1.014154911	14.56089771	-1.267399788	0.611782745	0	0	0.159312948
520	Flood Spring	Spring	Flood	58	5081.8924	0	0	0	0	5.0818924	0	-87.16	30.33994103	6.764700174	8.757060051	26.42174959	4.71601966	0.35313313	0	471.9631903	0.24013064	5.949369907	21.49994993	24.44727468	-0.815330267	12.74288988	-1.974474907	0.622022495	0	0	0.016323222
521	Flood Spring	Spring	Flood	59	1419.28524	0	0	0	0	1.41928524	0	-87.15	30.33995342	7.646267772	7.743057251	24.17622519	1.62383563	0.29545376	0	0	0.26447081	6.431299925	18.35745001	24.22727489	-1.214967847	10.61439276	0.051049709	0.647728488	0	0	7.37E-05
522	Flood Spring	Spring	Flood	60	0	0	0	0	0	0	0	-87.14	30.33996499	8.12083745	7.411637425	22.85497475	2.23924912	0.27539509	0	0	0.13698444	7.429387569	7.069519877	23.49072504	-0.691449881	-0.342117548	0.635750294	0.744903773	0.02833075	0	0.002998534
523	Flood Spring	Spring	Flood	61	0	0	0	0	0	0	0	-87.29	30.34875178	5.052847505	1.251165003	24.98017502	0.915894	0.21376822	0	0	0.25419389	3.518902481	0	23.67229986	-1.533945024	-1.251165003	-1.307875156	0.863523245	0.031489275	0	0.001059021
524	Flood Spring	Spring	Flood	62	443.25815	0	0	0	0	0.44325815	0	-87.27	30.34879562	6.459537387	4.039432436	25.22382498	2.99135117	0.55242429	0	0	0.41311728	7.809019983	7.69810009	23.95004988	1.349482596	3.658667654	-1.273775101	0.791997746	0.02358235	0	0.000371574
525	Flood Spring	Spring	Flood	63	2228.84503	0	0	0	0	2.22884503	0	-87.25	30.34881629	7.760170102	3.584317505	25.16499949	9.03747578	0.27575128	31.30988254	765.7643962	0.35175969	20.63390017	30.75409985	24.68957472	12.87373006	27.16978234	-0.475424767	0.574993491	0	0	0.354163777
526	Flood Spring	Spring	Flood	64	2474.27025	5	2	0	1	2.47427025	0.40415957	-87.24	30.34883614	7.626647472	0.668997496	24.84544992	9.43771736	0.04868084	1002.663633	1765.764396	0.01729509	20.08396034	30.44337959	24.63830032	12.45731287	29.7743821	-0.207149601	0.575720406	0	1	0.056415504
527	Flood Spring	Spring	Flood	65	904.08367	0	0	0	0	0.90408367	0	-87.23	30.34885516	7.506492496	0.631521009	24.72624969	9.24932061	0.02157624	1999.626595	2419.825469	0.01444995	19.188375	29.9458251	24.61964941	11.6818825	29.31430409	-0.106600285	0.581317484	0	0	0.005055713
528	Flood Spring	Spring	Flood	66	3374.9181	0	0	0	0	3.3749181	0	-87.22	30.34887336	7.518320084	1.592779994	24.70245028	8.1738359	0.14566576	1555.08843	1505.597421	0.04486714	17.91864967	29.21855021	24.54067469	10.40032959	27.62577021	-0.161775589	0.581429988	0	0	0.007724662
529	Flood Spring	Spring	Flood	67	33.38792	0	0	0	0	0.03338792	0	-87.21	30.34889072	7.668184996	2.757297516	24.72387457	5.7312502	0.10533204	850.8121228	697.9688771	0.04652367	16.18254995	28.23777533	24.4987998	8.514364958	25.48047781	-0.225074768	0.583978251	0	0	0.007085428
530	Flood Spring	Spring	Flood	68	2203.29575	0	0	0	0	2.20329575	0	-87.2	30.34890726	7.886722445	3.745427489	24.65442467	4.6813433	0.11761383	236.9802893	69.85041436	0.07057321	14.11459994	27.0723753	24.49080038	6.227877498	23.32694781	-0.163624287	0.589373752	0	0	0.017651678
531	Flood Spring	Spring	Flood	69	1926.47005	0	0	0	0	1.92647005	0	-87.19	30.34892297	7.506542444	3.427936919	25.36934996	2.36035252	0.30324738	0	0	0.14047472	11.73460007	25.76892471	24.50184965	4.228057623	22.34098779	-0.867500305	0.596374497	0	0	0.020538669
532	Flood Spring	Spring	Flood	70	638.41162	0	0	0	0	0.63841162	0	-87.18	30.34893785	6.281932354	2.008803509	27.48875046	0.93324474	0.20439295	0	0	0.18583596	5.573427558	12.0005002	23.75957489	-0.708504796	9.991696693	-3.729175568	0.663301766	0.0242201	0	0.003196512
533	Flood Spring	Spring	Flood	71	2829.49644	0	0	0	0	2.82949644	0	-87.17	30.3489519	6.702859998	6.060139544	26.83432484	2.33428481	0.25140799	0	0	0.18219603	4.785627365	11.60064983	23.75452518	-1.917232633	5.540510289	-3.079799652	0.664687008	0.0242201	0	0.004458208
534	Flood Spring	Spring	Flood	72	3517.32299	0	0	0	0	3.51732299	0	-87.16	30.34896513	7.182789922	8.053612471	25.64232492	3.26355504	0.29420794	0	0	0.15070145	6.539590073	19.20016003	24.28023987	-0.643199849	11.14654756	-1.362085056	0.641896212	0	0	0.006205005
535	Flood Spring	Spring	Flood	73	849.33568	0	0	0	0	0.84933568	0	-87.15	30.34897753	7.854089975	7.454034925	23.60515022	5.2561386	0.28127431	0	0	0.21836836	7.009072423	11.94470739	23.81734991	-0.845017552	4.490672469	0.212199688	0.703928247	0.00519502	0	0.000157968
536	Flood Spring	Spring	Flood	74	2683.22023	0	0	0	0	2.68322023	0	-87.25	30.35784033	7.942082524	1.889492512	24.74742508	6.11085007	0.51872226	0	1237.755381	0.39307189	20.9434597	30.85320015	24.43760033	13.00137718	28.96370764	-0.309824753	0.554780805	0	0	0.030412071
537	Flood Spring	Spring	Flood	75	798.89645	0	0	0	0	0.79889645	0	-87.24	30.35786018	7.771232605	1.018482506	24.56434965	9.36498252	0.05047271	996.5860798	2026.465313	0.02768006	20.44256655	30.54556656	24.3362325	12.67133395	29.52708405	-0.228117148	0.550752004	0	0	0.10829971
538	Flood Spring	Spring	Flood	76	3562.24873	0	0	0	0	3.56224873	0	-87.23	30.35787921	7.547887444	1.206633002	24.42802477	9.17844108	0.03685637	1996.58608	2288.841493	0.0195388	19.58824968	30.07620001	24.35282469	12.04036224	28.86956701	-0.075200081	0.557511747	0	0	0.002895681
539	Flood Spring	Spring	Flood	77	0	0	0	0	0	0	0	-87.22	30.35789741	7.393429875	2.055332512	24.36759949	8.53889142	0.14225931	1333.664525	1288.841493	0.09778417	18.50769997	29.43564987	24.25282478	11.11427009	27.38031736	-0.114774704	0.554512501	0	0	0.013120443
540	Flood Spring	Spring	Flood	78	2707.95991	0	0	0	0	2.70795991	0	-87.21	30.35791478	7.395817518	2.957702458	24.39427567	5.36479233	0.24211879	333.6645247	288.8414933	0.17600498	16.89356022	28.51337967	24.21639977	9.497742701	25.55567721	-0.1778759	0.557145607	0	0	0.012003651
541	Flood Spring	Spring	Flood	79	2048.74222	0	0	0	0	2.04874222	0	-87.2	30.35793133	7.168977499	2.754644521	25.41162491	1.91657424	0.26982844	0	0	0.16121752	11.9630124	20.57222509	23.95079994	4.794034898	17.81758057	-1.460824966	0.606185764	0.01211005	0	0.005591866
542	Flood Spring	Spring	Flood	80	3743.65246	0	0	0	0	3.74365246	0	-87.33	30.36670211	4.994282603	1.136082232	25.0611496	0.86854348	0.02067507	0	3083.799941	0.01994432	4.377067447	0.204999998	23.62789965	-0.617215157	-0.931082234	-1.43324995	0.817833498	0.033365	0	0.014150012
543	Flood Spring	Spring	Flood	81	6036.39816	0	0	0	0	6.03639816	0	-87.32	30.36672777	5.014744997	1.205873758	25.03100014	1.05186036	0.11588085	0	2946.15342	0.0625525	3.505430043	0	23.64859962	-1.509314954	-1.205873758	-1.382400513	0.837122753	0.032586425	0	0.010032196
544	Flood Spring	Spring	Flood	82	277.62335	0	0	0	0	0.27762335	0	-87.31	30.3667526	5.049515009	1.326387465	24.98012543	0.81291207	0.07729294	0	2264.937158	0.07142342	3.518709958	0	23.67197561	-1.530805051	-1.326387465	-1.308149815	0.862535238	0.031602375	0	0.007646966
545	Flood Spring	Spring	Flood	83	1472.13998	0	0	0	0	1.47213998	0	-87.3	30.36677661	6.526034951	1.51769501	24.41012526	0.9901348	0.10005788	0	1880.16818	0.07914203	3.51877749	0	23.67210007	-3.007257462	-1.51769501	-0.738025188	0.863053232	0.031532074	0	0.009253393
546	Flood Spring	Spring	Flood	84	1488.88926	0	0	0	0	1.48888926	0	-87.29	30.36679979	6.376445055	2.111900032	25.09647465	1.08266122	0.09759672	0	1798.377091	0.06996977	5.4943524	2.599999905	23.45597506	-0.882092655	0.488099873	-1.640499592	0.820339501	0.032986799	0	0.033456616
547	Flood Spring	Spring	Flood	85	0	0	0	0	0	0	0	-87.28	30.36682214	5.590174913	2.165932506	25.6105504	0.9631328	0.09026688	0	1810.318774	0.06421501	4.506342411	1.299999952	23.56367493	-1.083832502	-0.865932554	-2.046875477	0.820055991	0.03295975	0	0.020397378
548	Flood Spring	Spring	Flood	86	111.43189	0	0	0	0	0.11143189	0	-87.27	30.36684366	6.584295034	1.837277502	24.88152552	0.89792138	0.19004695	0	1903.268885	0.17939982	12.44578016	15.51482487	23.9545002	5.861485124	13.67754737	-0.927025318	0.69866924	0.015704075	0	0.000953572
549	Flood Spring	Spring	Flood	87	2642.67906	0	0	0	0	2.64267906	0	-87.25	30.36686435	8.018957376	2.098567456	24.68942499	7.55197183	0.50375328	375.144934	2103.521452	0.36965686	21.18302488	30.89970016	24.16342497	13.16406751	28.80113271	-0.526000023	0.530580014	0	0	0.097747983
550	Flood Spring	Spring	Flood	88	3727.11968	0	0	0	0	3.72711968	0	-87.24	30.36688421	7.794195175	1.885212481	24.53910017	9.98010093	0.0564369	1335.992265	2649.584002	0.02380448	20.72677469	30.62222528	24.09895039	12.93257952	28.7370128	-0.440149784	0.529027745	0	0	0.051247569
551	Flood Spring	Spring	Flood	89	0	0	0	0	0	0	0	-87.23	30.36690325	7.462332487	2.289024979	24.37179995	9.00857761	0.09051339	2185.874537	2298.548978	0.03436971	20.02892494	30.19657421	24.01537514	12.56659245	27.90754923	-0.356424809	0.527005494	0	0	0.00098554
552	Flood Spring	Spring	Flood	90	1490.18713	0	0	0	0	1.49018713	0	-87.22	30.36692146	7.135959864	3.142414987	24.25029993	9.06391869	0.08966333	1348.61061	1306.003223	0.04678087	19.2909255	29.70312548	23.84884977	12.15496564	26.56071049	-0.401450157	0.516867504	0	0	0.015143053
553	Flood Spring	Spring	Flood	91	2941.85526	0	0	0	0	2.94185526	0	-87.21	30.36693883	6.915347457	4.050372481	24.24510002	5.89845242	0.40430174	385.4044856	357.7169708	0.15477805	18.71312523	29.25252533	23.64439964	11.79777777	25.20215285	-0.600700378	0.501325749	0	0	0.017057954
554	Flood Spring	Spring	Flood	92	1866.03396	0	0	0	0	1.86603396	0	-87.2	30.36695538	6.757570028	4.894899964	24.35377502	3.77088823	0.28003954	154.3403358	205.9447629	0.2050781	18.65172482	28.99987507	23.33572483	11.89415479	24.1049751	-1.018050194	0.473643996	0.000143517	0	0.005241594
555	Flood Spring	Spring	Flood	93	1705.30301	0	0	0	0	1.70530301	0	-87.19	30.3669711	6.675392509	5.552265048	24.58037472	2.66581842	0.36184189	0	527.6236353	0.16648869	18.83777571	28.84435034	23.00037527	12.1623832	23.29208529	-1.579999447	0.442550495	0.006930368	0	0.006816382
556	Flood Spring	Spring	Flood	94	0	0	0	0	0	0	0	-87.16	30.36701329	6.715352416	2.686001807	27.0227747	0.19165669	0.10545418	0	624.7418179	0.17471668	10.9197253	14.02950001	22.71864986	4.204372883	11.3434982	-4.304124832	0.575890005	0.038560575	0	0.0313941
557	Flood Spring	Spring	Flood	95	663.60037	0	0	0	0	0.66360037	0	-87.15	30.3670257	6.628109932	2.509114429	27.34027481	0.30368078	0.13157079	0	398.8232531	0.19204184	10.92997491	13.98514986	22.69204998	4.301864982	11.47603543	-4.648224831	0.579333514	0.03948555	0	0.029445674
558	Flood Spring	Spring	Flood	96	928.68243	0	0	0	0	0.92868243	0	-87.32	30.37575173	4.896312475	0.75484252	25.20590019	0.75352345	0.05563749	0	3664.189416	0.06180387	3.454665005	0	23.5592494	-1.44164747	-0.75484252	-1.646650791	0.741400748	0.036083425	0	0.008979683
559	Flood Spring	Spring	Flood	97	6035.22169	0	0	0	0	6.03522169	0	-87.31	30.37577657	6.427702427	1.229363248	24.54975033	1.2014055	0.09193082	0	3138.991472	0.07121114	3.438925028	0	23.53150082	-2.988777399	-1.229363248	-1.018249512	0.711976498	0.036921449	0	0.131927973
560	Flood Spring	Spring	Flood	98	5701.90927	0	0	0	0	5.70190927	0	-87.3	30.37580059	6.412957549	1.211598247	24.56797552	1.313093	0.08978947	0	2871.587036	0.06214289	3.432245016	0	23.51974964	-2.980712533	-1.211598247	-1.04822588	0.699281991	0.0372879	0	0.210459166
561	Flood Spring	Spring	Flood	99	4912.39437	0	0	0	0	4.91239437	0	-87.29	30.37582378	6.203102469	2.009993255	25.49422503	1.07389807	0.10098552	0	2798.377091	0.06541904	4.439717412	1.299999952	23.44637489	-1.763385057	-0.709993303	-2.047850132	0.695100754	0.037416399	0	0.126982082
562	Flood Spring	Spring	Flood	100	11993.38747	3	0	0	1	11.99338747	0.083379279	-87.28	30.37584613	5.940934896	2.791499749	26.47664976	1.31827136	0.10412269	0	2806.06633	0.05541649	3.402289987	0	23.46700001	-2.53864491	-2.791499749	-3.009649754	0.637013525	0.03837445	1	0.060682901
563	Flood Spring	Spring	Flood	101	6063.76096	0	0	0	0	6.06376096	0	-87.27	30.37586766	8.137969971	2.514287531	24.82905006	0.99167198	0.21211458	0	2888.183941	0.22827815	21.37779951	30.97254992	24.05282497	13.23982954	28.45826238	-0.77622509	0.518711507	0	0	0.000101749
564	Flood Spring	Spring	Flood	102	4478.75461	0	0	0	0	4.47875461	0	-87.25	30.37588836	8.057005167	2.437830031	24.79242516	6.36978817	0.41574277	356.8027146	3052.468938	0.21762205	21.25007439	30.86775017	23.95599937	13.19306922	28.42992014	-0.836425781	0.511404991	0	0	0.030570485
565	Flood Spring	Spring	Flood	103	177.02334	0	0	0	0	0.17702334	0	-87.24	30.37590823	7.822515011	2.61383754	24.70027542	8.78123419	0.12287798	1137.848246	3451.530023	0.03071425	20.94707489	30.65690041	23.84765005	13.12455988	28.04306287	-0.85262537	0.505039237	0	0	0.022437364
566	Flood Spring	Spring	Flood	104	1267.05106	0	0	0	0	1.26705106	0	-87.23	30.37592727	7.398759961	3.317492485	24.50754976	7.86616982	0.12450688	1653.883537	2589.474781	0.02740615	20.48239994	30.33767462	23.71185017	13.08363998	27.02018213	-0.795699596	0.497728504	0	0	0.00150704
567	Flood Spring	Spring	Flood	105	1312.92388	0	0	0	0	1.31292388	0	-87.22	30.37594549	6.922354937	4.316192508	24.29420042	8.33218217	0.13421377	1788.693032	1768.529518	0.04328187	19.99872494	29.96694946	23.50497484	13.07637	25.65075696	-0.789225578	0.483165495	0	0	0.001178758
568	Flood Spring	Spring	Flood	106	0	0	0	0	0	0	0	-87.21	30.37596287	6.630429983	5.117389917	24.23709965	8.43783841	0.17470233	1236.578037	1244.99545	0.12389625	19.58412504	29.59807539	23.2902751	12.95369506	24.48068547	-0.946824551	0.465337753	0.001929857	0	0.005108782
569	Flood Spring	Spring	Flood	107	2250.77437	0	0	0	0	2.25077437	0	-87.2	30.37597943	6.555747509	5.701505065	24.33310032	6.0860652	0.18650154	975.2847402	1205.944763	0.05750299	19.23554945	29.19957495	23.06022501	12.67980194	23.49806988	-1.272875309	0.444402762	0.00677404	0	0.002881671
570	Flood Spring	Spring	Flood	108	800.33847	0	0	0	0	0.80033847	0	-87.19	30.37599515	6.593547344	6.24068749	24.49884987	3.90797247	0.41928615	278.812974	1328.304518	0.26016203	18.98770046	28.81640005	22.8359499	12.39415312	22.57571256	-1.662899971	0.425703503	0.0133726	0	0.004895101
571	Flood Spring	Spring	Flood	109	625.01969	0	0	0	0	0.62501969	0	-87.18	30.37601005	6.716412425	6.775417566	24.73587513	3.91370812	0.39015563	0	1940.680957	0.18811309	18.80967474	28.47142506	22.65262508	12.09326231	21.69600749	-2.083250046	0.417319	0.019495225	0	0.018838649
572	Flood Spring	Spring	Flood	110	3778.85575	0	0	0	0	3.77885575	0	-87.17	30.37602412	7.034857512	6.530330062	25.20964956	4.75842216	0.34174813	0	1970.015288	0.239436	18.71810007	28.19825029	22.51344967	11.68324256	21.66792023	-2.696199894	0.419871248	0.025129225	0	0.080403566
573	Flood Spring	Spring	Flood	111	3166.47389	0	0	0	0	3.16647389	0	-87.16	30.37603736	7.232790112	5.524362445	25.86912489	5.04576051	0.25524317	433.92602	1613.093294	0.2312706	18.69927454	28.03014994	22.43550014	11.46648443	22.50578749	-3.433624744	0.429438502	0.02877275	0	0.095579424
574	Flood Spring	Spring	Flood	112	5238.06809	11	2	1	1	5.23806809	0.19091008	-87.15	30.37604977	7.084502339	4.854055047	26.69700003	4.83056331	0.24284059	299.7904432	1382.493484	0.20465906	18.7416997	27.93902493	22.37839985	11.65719736	23.08496988	-4.318600178	0.439150251	0.0307394	1	0.085797646
575	Flood Spring	Spring	Flood	113	0	0	0	0	0	0	0	-87.14	30.37606135	6.391394973	2.520952277	27.74772501	1.54275218	0.25833181	0	1089.48408	0.20659222	10.9562	13.9630003	22.66542482	4.564805031	11.44204802	-5.082300186	0.58169426	0.039874675	0	0.096485348
576	Flood Spring	Spring	Flood	114	267.29969	0	0	0	0	0.26729969	0	-87.29	30.38484775	4.730684996	0.595984742	25.39907551	1.04961519	0.05341092	0	3798.377091	0.02266127	3.414292455	0	23.48817444	-1.316392541	-0.595984742	-1.91090107	0.662198246	0.037930525	0	0.027157345
577	Flood Spring	Spring	Flood	115	171.9322	0	0	0	0	0.1719322	0	-87.28	30.38487012	4.678227544	0.580212742	25.45652485	0.75114542	0.04067451	0	3804.045535	0.04501111	3.400992513	0	23.46474981	-1.277235031	-0.580212742	-1.991775036	0.634768754	0.0384052	0	0.014983356
578	Flood Spring	Spring	Flood	116	0	0	0	0	0	0	0	-87.25	30.38491236	8.09155488	2.644777477	24.96047497	1.83468074	0.3363259	0	4026.205501	0.24621894	16.73866266	23.08139992	23.70897532	8.64710778	20.43662244	-1.251499653	0.528283253	0.0096834	0	0.001363828
579	Flood Spring	Spring	Flood	117	1427.4524	0	0	0	0	1.4274524	0	-87.24	30.38493224	7.920082569	3.027260005	24.9833746	5.32796808	0.37162219	309.9535521	3962.967937	0.16410884	20.96980019	30.58746033	23.62042007	13.04971762	27.56020032	-1.362954521	0.482899404	0.000801546	0	0.018515336
580	Flood Spring	Spring	Flood	118	2165.03276	0	0	0	0	2.16503276	0	-87.23	30.38495128	7.456794977	4.001472652	24.79445028	5.3492535	0.26456822	802.7753751	3182.362626	0.1410237	20.66954994	30.35645008	23.47149992	13.21275496	26.35497743	-1.322950363	0.473516509	0.002628344	0	0.003917895
581	Flood Spring	Spring	Flood	119	0	0	0	0	0	0	0	-87.22	30.3849695	6.80430758	5.250742435	24.42560005	7.2517948	0.16698071	1069.868092	2559.24772	0.02873286	20.30092525	30.05062532	23.25474977	13.49661767	24.79988289	-1.170850277	0.45781	0.00782497	0	0.00522627
582	Flood Spring	Spring	Flood	120	2405.88373	0	0	0	0	2.40588373	0	-87.21	30.38498689	6.502057552	5.783064842	24.33307505	9.03286915	0.06854219	1134.813403	2229.812976	0.05243063	19.94064999	29.73190022	23.06355	13.43859243	23.94883537	-1.269525051	0.441349752	0.012514877	0	0.010003901
583	Flood Spring	Spring	Flood	121	336.74961	0	0	0	0	0.33674961	0	-87.2	30.38500346	6.513872385	6.051255107	24.41392469	8.3611984	0.11291036	1332.939414	2195.213515	0.03054101	19.47324944	29.26082468	22.87140036	12.95937705	23.20956957	-1.542524338	0.422869503	0.015754175	0	0.00320037
584	Flood Spring	Spring	Flood	122	332.32309	0	0	0	0	0.33232309	0	-87.19	30.38501919	6.564464808	6.83254993	24.40735006	7.72439637	0.08265321	1137.951263	2259.875131	0.02339897	19.05152464	28.77645016	22.69264936	12.48705983	21.94390023	-1.714700699	0.407602511	0.01830105	0	0.002872737
585	Flood Spring	Spring	Flood	123	3930.43807	0	0	0	0	3.93043807	0	-87.18	30.38503409	6.629994988	7.684567571	24.485075	7.53187792	0.04289856	671.3729973	2679.642643	0.01789157	18.79535055	28.40950012	22.55362511	12.16535556	20.72493255	-1.93144989	0.403659254	0.021612575	0	0.00915456
586	Flood Spring	Spring	Flood	124	0	0	0	0	0	0	0	-87.17	30.38504816	6.744714975	7.639917254	24.98027515	6.95849078	0.07110842	675.0124355	2846.63267	0.03003003	18.67567492	28.15307522	22.4550004	11.93095994	20.51315796	-2.525274754	0.411866002	0.025433525	0	0.01779758
587	Flood Spring	Spring	Flood	125	2180.70903	0	0	0	0	2.18070903	0	-87.16	30.38506141	6.804927468	6.620847583	25.92857504	6.3336123	0.04171274	1254.372613	2568.797689	0.01799358	18.65197468	27.98262501	22.38747549	11.84704721	21.36177742	-3.541099548	0.426292747	0.028670475	0	0.015728846
588	Flood Spring	Spring	Flood	126	1912.84724	0	0	0	0	1.91284724	0	-87.15	30.38507382	6.654940128	5.446374893	27.1105504	5.53076151	0.16597013	854.7092938	2366.725623	0.15549648	18.72874975	27.89610004	22.32884979	12.07380962	22.44972515	-4.781700611	0.439891748	0.0307631	0	0.116142248
589	Flood Spring	Spring	Flood	127	0	0	0	0	0	0	0	-87.14	30.38508541	6.351359963	4.381005049	28.06214952	2.28768935	0.34616738	27.58155132	2034.675399	0.26427274	18.9062748	27.90412521	22.28125	12.55491483	23.52312016	-5.780899525	0.448229253	0.031790099	0	0.20134333
590	Flood Spring	Spring	Flood	128	144.90031	0	0	0	0	0.14490031	0	-87.13	30.38509617	5.947622418	1.61462523	28.00307465	0.44232621	0.14651741	0	1562.072954	0.19694434	11.20327508	13.98105001	22.56062508	5.255652666	12.36642478	-5.44244957	0.588335007	0.04036545	0	0.04373122
591	Flood Spring	Spring	Flood	129	486.58704	0	0	0	0	0.48658704	0	-87.24	30.39395623	7.22878027	2.50622125	25.35202503	0.70297858	0.10237904	0	3654.233931	0.09543162	12.1456449	15.26279974	23.44750023	4.916864634	12.75657849	-1.904524803	0.490807243	0.023058632	0	0.010869075
592	Flood Spring	Spring	Flood	130	1986.43066	0	0	0	0	1.98643066	0	-87.23	30.39397528	7.718984962	4.100027561	25.22367477	2.02649507	0.25348687	0	2730.650823	0.1306655	20.6856246	30.30587482	23.31857538	12.96663964	26.20584726	-1.905099392	0.456543751	0.011681503	0	0.007583428
593	Flood Spring	Spring	Flood	131	4688.54876	4	1	0	1	4.68854876	0.213285614	-87.22	30.39399351	6.773037434	5.726165056	24.57095003	5.93239358	0.34906844	69.86809154	1885.481317	0.14306767	20.32850027	29.98962498	23.08950043	13.55546284	24.26345992	-1.481449604	0.443051502	0.017062075	1	0.023549322
594	Flood Spring	Spring	Flood	132	1837.14128	0	0	0	0	1.83714128	0	-87.21	30.39401091	6.627644897	5.455487609	24.6234746	8.45057168	0.15452836	302.103307	1281.85783	0.09798434	19.9090004	29.60687494	22.88514996	13.2813555	24.15138733	-1.738324642	0.431312494	0.022217175	0	0.257716097
595	Flood Spring	Spring	Flood	133	0	0	0	0	0	0	0	-87.2	30.39402747	6.827632546	5.054527521	24.81187534	9.16535193	0.10591246	353.5313115	1195.213515	0.07500776	19.42420006	29.13392496	22.71604919	12.59656751	24.07939744	-2.095826149	0.415080495	0.023609525	0	0.415821492
596	Flood Spring	Spring	Flood	134	3965.91056	0	0	0	0	3.96591056	0	-87.19	30.39404321	6.766884923	6.519455075	24.46087503	8.05049391	0.08355328	930.6235316	1310.1941	0.03790254	19.00237513	28.68030024	22.57359982	12.2354902	22.16084516	-1.887275219	0.400345251	0.0219244	0	0.016902965
597	Flood Spring	Spring	Flood	135	0	0	0	0	0	0	0	-87.18	30.39405812	6.637704968	8.487442255	24.09022522	7.65399861	0.03086257	1671.372997	1920.017854	0.0111886	18.73499966	28.33707523	22.46347427	12.09729469	19.84963298	-1.626750946	0.397518501	0.022630125	0	0.000268724
598	Flood Spring	Spring	Flood	136	1348.70023	0	0	0	0	1.34870023	0	-87.17	30.3940722	6.621704936	8.750455141	24.50102472	7.15813743	0.04419443	1672.838242	2709.283771	0.00783828	18.59797525	28.09004974	22.38277483	11.97627032	19.3395946	-2.118249893	0.407643512	0.025292675	0	0.00027882
599	Flood Spring	Spring	Flood	137	2655.24212	0	0	0	0	2.65524212	0	-87.16	30.39408545	6.602217555	7.628272414	25.54185009	6.32505918	0.0467957	1984.537483	3533.601492	0.00867365	18.57327557	27.92039967	22.32445002	11.97105801	20.29212725	-3.217400074	0.425135508	0.0282414	0	0.000484734
600	Flood Spring	Spring	Flood	138	0	0	0	0	0	0	0	-87.15	30.39409787	6.451317549	6.06022501	26.82262516	5.85864811	0.04983474	1432.409778	3319.104263	0.03591916	18.68705082	27.84270048	22.26800013	12.23573327	21.78247547	-4.554625034	0.441170499	0.0304474	0	0.01804332
601	Flood Spring	Spring	Flood	139	2767.892	1	0	0	1	2.767892	0.361285773	-87.14	30.39410946	6.185462475	4.418760002	27.80522442	6.28704561	0.09295337	831.3114207	2933.223615	0.09680779	18.94653969	27.88250046	22.21375999	12.76107721	23.46374046	-5.591464424	0.451081395	0.031745079	1	0.119379002
602	Flood Spring	Spring	Flood	140	2801.70775	0	0	0	0	2.80170775	0	-87.13	30.39412022	5.971475005	2.573504984	27.11955023	5.22940244	0.27696432	394.2088726	2502.167831	0.2399581	19.37184954	27.98250008	22.10407495	13.40037453	25.40899509	-5.015475273	0.458321758	0.032283249	0	0.30263292
603	Flood Spring	Spring	Flood	141	1997.7571	0	0	0	0	1.9977571	0	-87.12	30.39413015	5.840735078	0.88875173	25.39922523	2.74042514	0.32266082	36.35978611	2256.183944	0.1689662	19.84247494	28.04834986	21.98127508	14.00173986	27.15959813	-3.417950153	0.462407999	0.032207625	0	0.078963024
604	Flood Spring	Spring	Flood	142	716.68821	7	0	0	1	0.71668821	1.395306894	-87.11	30.39413925	5.828712463	0.195029752	25.08314991	1.02257277	0.21263968	0	1944.68176	0.1691948	15.94238704	20.984725	22.15687513	10.11367458	20.78969525	-2.926274776	0.528146006	0.0359614	1	0.026952602
605	Flood Spring	Spring	Flood	143	0	0	0	0	0	0	0	-87.1	30.39414752	5.905307412	0.795548014	25.99227476	0.14633137	0.05475894	0	1779.5682	0.07878441	11.76962459	13.78359985	22.40380001	5.864317179	12.98805184	-3.588474751	0.592327766	0.03978645	0	0.068252092
606	Flood Spring	Spring	Flood	144	0	0	0	0	0	0	0	-87.27	30.40293959	4.6047225	0.53881824	25.50777483	0.61038044	0.01443743	0	5452.488011	0.01458737	3.375032544	0	23.41907501	-1.229689956	-0.53881824	-2.088699818	0.582748234	0.038750225	0	0.007392685
607	Flood Spring	Spring	Flood	145	0	0	0	0	0	0	0	-87.25	30.40296032	4.869885087	0.338304378	24.93384981	0.93960387	0.08668738	0	4453.386779	0.06490813	3.356994987	0	23.38729954	-1.5128901	-0.338304378	-1.546550274	0.478244007	0.036831566	0	0.017535139
608	Flood Spring	Spring	Flood	146	0	0	0	0	0	0	0	-87.24	30.40298021	4.782747388	0.474499498	25.84800005	0.87637939	0.02407526	0	3454.805652	0.0130215	3.319567561	0	23.32139969	-1.463179827	-0.474499498	-2.526600361	0.394252501	0.041912924	0	0.091523338
609	Flood Spring	Spring	Flood	147	0	0	0	0	0	0	0	-87.23	30.40299927	5.130669951	1.487144709	25.3448	0.63576127	0.02914312	0	2457.378763	0.02607335	11.98478758	15.12997532	23.28840017	6.854117632	13.64283061	-2.056399822	0.441915743	0.0324964	0	0.019885159
610	Flood Spring	Spring	Flood	148	0	0	0	0	0	0	0	-87.22	30.4030175	5.42466259	3.029638425	25.375175	1.70540743	0.20790543	0	1463.468032	0.18084416	15.96399462	22.36774969	23.05255032	10.53933203	19.33811127	-2.322624683	0.455320753	0.031045925	0	0.020567004
611	Flood Spring	Spring	Flood	149	1584.61124	0	0	0	0	1.58461124	0	-87.21	30.40303491	5.375164926	2.493707225	25.77812529	3.9884025	0.34566541	0	494.7393001	0.11685095	15.6766026	22.09732485	22.91855049	10.30143768	19.60361762	-2.859574795	0.488720238	0.039192826	0	0.151077736
612	Flood Spring	Spring	Flood	150	3754.65358	0	0	0	0	3.75465358	0	-87.2	30.40305148	7.526192546	2.202120036	25.78434992	4.66574901	0.47077104	0	195.2135147	0.26902204	19.21665001	28.89387465	22.58684969	11.69045746	26.69175461	-3.197500229	0.425286248	0.0302968	0	0.255965882
613	Flood Spring	Spring	Flood	151	319.72889	0	0	0	0	0.31972889	0	-87.19	30.40306722	7.209887505	4.764939964	24.8373251	6.1725052	0.1201509	650.7040604	505.8083926	0.04028478	18.88237524	28.5397501	22.47142506	11.67248774	23.77481014	-2.36590004	0.416373	0.024359025	0	0.065235478
614	Flood Spring	Spring	Flood	152	552.364	0	0	0	0	0.552364	0	-87.18	30.40308213	6.800037503	8.864757538	23.58959961	6.93339013	0.07179567	926.0225178	1321.275616	0.02789286	18.63787556	28.24325037	22.36870003	11.83783805	19.37849283	-1.220899582	0.410856001	0.0236448	0	0.001866858
615	Flood Spring	Spring	Flood	153	3363.34007	0	0	0	0	3.36334007	0	-87.17	30.40309622	6.719534993	9.316417694	23.8508749	7.0727496	0.03483844	1624.96534	2248.126222	0.01126586	18.4944253	28.00955009	22.28627539	11.7748903	18.6931324	-1.564599514	0.414822504	0.025343925	0	0.0001389
616	Flood Spring	Spring	Flood	154	0	0	0	0	0	0	0	-87.16	30.40310947	6.699422479	8.184297562	24.70300007	6.2359605	0.06106569	2114.675498	3218.814033	0.00545793	18.47542477	27.83799982	22.22984982	11.77600229	19.65370226	-2.473150253	0.429784752	0.0279373	0	7.93E-05
617	Flood Spring	Spring	Flood	155	1541.70854	0	0	0	0	1.54170854	0	-87.15	30.4031219	6.581047535	6.499200106	25.63574982	5.57022539	0.02310732	2222.619568	4203.267306	0.01495254	18.6231246	27.75772524	22.18027496	12.04207706	21.25852513	-3.455474854	0.444704995	0.030090325	0	0.000273009
618	Flood Spring	Spring	Flood	156	2480.49819	0	0	0	0	2.48049819	0	-87.14	30.40313349	6.349760056	4.552652597	26.234375	5.7731086	0.04357407	1706.402021	3797.969552	0.02213891	18.97560024	27.84667492	22.11897516	12.62584019	23.29402232	-4.115399837	0.454288743	0.03146415	0	0.005182897
619	Flood Spring	Spring	Flood	157	0	0	0	0	0	0	0	-87.13	30.40314425	6.132387519	2.640052438	25.84310007	5.81275779	0.05194273	1320.920876	3472.384519	0.03351817	19.46447515	28.00404978	22.02584982	13.33208764	25.36399734	-3.817250252	0.460063748	0.032049925	0	0.013357508
620	Flood Spring	Spring	Flood	158	2241.31162	0	0	0	0	2.24131162	0	-87.12	30.40315419	5.993787527	1.149066731	24.73710012	5.65590239	0.04554253	969.5745461	3209.946743	0.04449952	19.98322487	28.08605003	21.90944958	13.98943734	26.9369833	-2.827650547	0.463407002	0.0319656	0	0.014123073
621	Flood Spring	Spring	Flood	159	710.8581	0	0	0	0	0.7108581	0	-87.11	30.40316329	5.945690036	0.655045763	23.88647509	5.11375779	0.15687714	561.0237463	2906.142999	0.13425503	20.36509991	27.95292521	21.83290005	14.41940987	27.29787944	-2.053575039	0.464580998	0.031529625	0	0.030587838
622	Flood Spring	Spring	Flood	160	443.55755	0	0	0	0	0.44355755	0	-87.1	30.40317157	5.976204872	1.411116242	23.77785015	3.23082579	0.32990746	160.9117866	2776.20736	0.1428638	20.47382498	27.48597479	21.81992483	14.49762011	26.07485855	-1.95792532	0.46448075	0.030946875	0	0.046311873
623	Flood Spring	Spring	Flood	161	608.07777	0	0	0	0	0.60807777	0	-87.09	30.40317901	5.994397402	2.606882513	23.94330025	1.03293164	0.13113163	0	2514.341634	0.17125328	20.22424984	26.61252499	21.87872458	14.22985244	24.00564247	-2.064575672	0.463777244	0.030363575	0	0.026446864
624	Flood Spring	Spring	Flood	162	868.37796	0	0	0	0	0.86837796	0	-87.08	30.40318563	5.982450008	3.689722478	24.14562511	0.97150795	0.17372761	0	2230.510756	0.12942272	19.58847475	25.30192471	22.00957489	13.60602474	21.61220223	-2.136050224	0.462876245	0.0298533	0	0.030127833
625	Flood Spring	Spring	Flood	163	2130.60662	0	0	0	0	2.13060662	0	-87.07	30.40319142	5.924422383	4.354734898	24.36232519	1.39715878	0.22317367	0	2223.570512	0.16327677	18.60317516	23.58260012	22.20927477	12.67875278	19.22786522	-2.153050423	0.461969495	0.029443075	0	0.040862104
626	Flood Spring	Spring	Flood	164	1008.04324	0	0	0	0	1.00804324	0	-87.06	30.40319637	5.821192503	4.599920034	24.60887575	1.32531596	0.22693178	51.47358565	2129.289491	0.16946093	17.36592484	21.56839991	22.46740007	11.54473233	16.96847987	-2.141475677	0.461104505	0.02914075	0	0.030937268
627	Flood Spring	Spring	Flood	165	1604.68049	0	0	0	0	1.60468049	0	-87.05	30.4032005	5.715517521	4.584419966	24.96045017	1.57130047	0.2778603	25.33909566	1816.75185	0.23972793	16.10213985	19.58278008	22.74265976	10.38662233	14.99836011	-2.217790413	0.460363591	0.02895746	0	0.030248996
628	Flood Spring	Spring	Flood	166	3101.89135	0	0	0	0	3.10189135	0	-87.04	30.40320379	5.650895	4.476252556	25.50567532	1.24416818	0.23735641	0	1738.825084	0.22886859	15.04775	17.94435024	22.9874754	9.396854997	13.46809769	-2.518199921	0.459801242	0.02886595	0	0.025619977
629	Flood Spring	Spring	Flood	167	1106.28933	0	0	0	0	1.10628933	0	-87.03	30.40320626	5.657912612	3.379873827	26.6498251	0.40039827	0.1228297	0	1597.954229	0.14982483	8.367225051	7.851624966	23.15645027	2.709312439	4.471751139	-3.493374825	0.589619011	0.0386088	0	0.016249295
630	Flood Spring	Spring	Flood	168	0	0	0	0	0	0	0	-87.2	30.41207547	6.484165132	0.946666509	26.50500011	1.02035716	0.24257703	0	0	0.21395679	15.06373757	21.48637533	22.68607521	8.579572439	20.53970882	-3.818924904	0.495000005	0.041250001	0	0.021248826
631	Flood Spring	Spring	Flood	169	10.89032	0	0	0	0	0.01089032	0	-87.19	30.41209122	7.440812469	2.350785062	25.49627495	3.97275371	0.29801753	0	153.3461347	0.14509063	18.7517004	28.39849997	22.38320017	11.31088793	26.0477149	-3.11307478	0.443294995	0.0278497	0	0.135668892
632	Flood Spring	Spring	Flood	170	3749.95984	0	0	0	0	3.74995984	0	-87.18	30.41210614	7.105350018	6.927884936	23.86924934	4.93237549	0.26250272	439.7625559	1153.346135	0.13425289	18.52287531	28.13002491	22.2579751	11.41752529	21.20213997	-1.611274242	0.433734499	0.0254268	0	0.007464719
633	Flood Spring	Spring	Flood	171	766.07205	0	0	0	0	0.76607205	0	-87.17	30.41212023	7.027802467	8.05493021	23.71289968	6.59517001	0.08226751	716.1729595	2153.346135	0.07282923	18.37954998	27.9078002	22.1461997	11.35174751	19.85286999	-1.566699982	0.430749252	0.026050725	0	0.004013545
634	Flood Spring	Spring	Flood	172	609.59129	0	0	0	0	0.60959129	0	-87.16	30.41213349	7.012867451	7.753214955	23.97727489	6.3716064	0.04050667	1412.641371	3153.346135	0.01070162	18.38157511	27.74457502	22.07297516	11.36870766	19.99136007	-1.904299736	0.440214254	0.028157525	0	0.000463661
635	Flood Spring	Spring	Flood	173	3215.60779	0	0	0	0	3.21560779	0	-87.15	30.41214591	6.928987503	6.526232362	24.36367464	5.72012582	0.03001386	2231.484625	4153.346135	0.01190421	18.56279993	27.64782476	22.03149986	11.63381243	21.1215924	-2.332174778	0.450805999	0.029995325	0	4.92E-05
636	Flood Spring	Spring	Flood	174	0	0	0	0	0	0	0	-87.14	30.41215751	6.658635139	4.602152586	24.82942533	5.5063339	0.00309354	2626.654656	4716.497076	0.00265412	18.98212481	27.79227495	21.98295021	12.32348967	23.19012237	-2.846475124	0.457423501	0.031173775	0	3.37E-05
637	Flood Spring	Spring	Flood	175	1652.40355	0	0	0	0	1.65240355	0	-87.13	30.41216828	6.413542628	2.924615026	24.81447506	5.47714251	0.01594414	2266.606995	4455.747559	0.02429016	19.53745031	28.00544977	21.90905046	13.12390769	25.08083475	-2.905424595	0.461584747	0.031701775	0	0.000158648
638	Flood Spring	Spring	Flood	176	918.06308	0	0	0	0	0.91806308	0	-87.12	30.41217822	6.27314496	1.846517533	24.34027529	5.4616952	0.015394	1871.218873	4171.800767	0.0220565	20.09207535	28.08597469	21.81454992	13.81893039	26.23945716	-2.525725365	0.464081496	0.031627974	0	0.000420566
639	Flood Spring	Spring	Flood	177	0	0	0	0	0	0	0	-87.11	30.41218733	6.204542518	1.510519981	23.96624947	5.52360978	0.01502964	1484.283129	3887.10009	0.01803011	20.46082497	27.89174986	21.77587509	14.25628245	26.38122988	-2.190374374	0.464789756	0.031222475	0	0.001615281
640	Flood Spring	Spring	Flood	178	2417.27701	0	0	0	0	2.41727701	0	-87.1	30.4121956	6.201730013	2.021305054	23.95065022	6.00595021	0.07817154	1063.604865	3772.330347	0.05911399	20.49977541	27.31134987	21.80639982	14.2980454	25.29004481	-2.144250393	0.464455999	0.030678725	0	0.018027628
641	Flood Spring	Spring	Flood	179	1308.94402	0	0	0	0	1.30894402	0	-87.09	30.41220305	6.214104891	2.956665039	24.11824989	5.00289919	0.26982592	882.2434728	3431.320121	0.22044315	20.14365005	26.29360008	21.90527487	13.92954516	23.33693504	-2.212975025	0.463645503	0.030134125	0	0.043599653
642	Flood Spring	Spring	Flood	180	3270.7589	2	1	0	1	3.2707589	0.305739442	-87.08	30.41220967	6.196434975	3.815382481	24.30872488	4.95542181	0.18115331	871.9336486	3228.361698	0.16746416	19.40387535	24.85475016	22.06595039	13.20744038	21.03936768	-2.242774487	0.462693252	0.02966625	1	0.046995963
643	Flood Spring	Spring	Flood	181	2612.94781	0	0	0	0	2.61294781	0	-87.07	30.41221546	6.154852509	4.325510025	24.57672501	4.68701521	0.11558471	936.9327488	3223.570512	0.04940389	18.34194946	23.05957508	22.2828002	12.18709695	18.73406506	-2.293924809	0.461747997	0.0293056	0	0.034903044
644	Flood Spring	Spring	Flood	182	0	0	0	0	0	0	0	-87.06	30.41222042	6.078764915	4.500884891	24.89782476	3.98934509	0.06969339	1046.970492	3057.935434	0.03560686	17.07192516	21.04107523	22.54467487	10.99316025	16.54019034	-2.353149891	0.460861251	0.029053225	0	0.019586996
645	Flood Spring	Spring	Flood	183	2472.33886	0	0	0	0	2.47233886	0	-87.05	30.41222454	5.97134757	4.465372562	25.27894974	4.6689599	0.07318428	1022.034797	2801.221851	0.0195006	15.73019981	18.96309996	22.83475018	9.758852243	14.49772739	-2.444199562	0.460058242	0.028893125	0	0.063106099
646	Flood Spring	Spring	Flood	184	0	0	0	0	0	0	0	-87.04	30.41222784	5.844215035	4.351362467	25.77944994	4.07020698	0.07460109	915.1269676	2738.825084	0.0434109	14.61905003	17.26139975	23.09007502	8.774834991	12.91003728	-2.689374924	0.459501006	0.028819275	0	0.06962684
647	Flood Spring	Spring	Flood	185	3347.41435	0	0	0	0	3.34741435	0	-87.03	30.41223031	5.670692444	4.233739972	26.38015032	2.89970589	0.13755769	629.0314337	2576.664618	0.08612119	13.23272491	15.10512519	23.43572474	7.562032461	10.87138522	-2.944425583	0.458776996	0.028752225	0	0.055607466
648	Flood Spring	Spring	Flood	186	2015.39861	0	0	0	0	2.01539861	0	-87.02	30.41223194	5.427255034	4.145500064	27.01222515	1.70014799	0.11734196	217.4058434	2429.82704	0.07917809	11.8371501	12.91805005	23.80662489	6.409895062	8.772549987	-3.205600262	0.458077498	0.028713576	0	0.058855101
649	Flood Spring	Spring	Flood	187	775.04722	0	0	0	0	0.77504722	0	-87	30.41223275	5.113867521	4.113352418	27.58270025	0.79744682	0.14349937	0	2286.249973	0.09588991	10.48274994	10.78095007	24.186625	5.368882418	6.667597651	-3.396075249	0.457440257	0.028696075	0	0.042008617
650	Flood Spring	Spring	Flood	188	0	0	0	0	0	0	0	-86.99	30.41223273	5.385344982	2.282765463	28.14632511	0.4229434	0.06793523	0	2134.520596	0.0619003	6.116940141	4.307275057	23.77854967	0.731595159	2.024509594	-4.36777544	0.58852651	0.038566675	0	0.042372845
651	Flood Spring	Spring	Flood	189	5545.14475	0	0	0	0	5.54514475	0	-87.19	30.42111521	4.61804992	0.864794254	26.5605998	0.99492126	0.09535744	0	350.3881953	0.07566784	7.124177456	7.060599804	23.03172541	2.506127536	6.19580555	-3.528874397	0.639635757	0.06153305	0	0.061765511
652	Flood Spring	Spring	Flood	190	769.4316	0	0	0	0	0.7694316	0	-87.18	30.42113013	6.55845499	2.136822745	25.58910036	0.84896094	0.18068345	0	1198.191968	0.15084578	10.81474012	14.01524973	22.63524961	4.256285131	11.87842698	-2.953850746	0.496552497	0.032884025	0	0.023595297
653	Flood Spring	Spring	Flood	191	2653.30248	0	0	0	0	2.65330248	0	-87.17	30.42114422	7.392002463	5.690065026	24.09732533	4.32637407	0.29304482	15.28943281	2178.053079	0.17651478	18.22780037	27.74337482	21.94212484	10.83579791	22.0533098	-2.155200481	0.44395075	0.027168575	0	0.032134353
654	Flood Spring	Spring	Flood	192	3483.3179	0	0	0	0	3.4833179	0	-87.16	30.42115749	7.349607468	6.618187547	23.69292498	6.15122199	0.05430279	880.8649836	3170.515169	0.0319932	18.26634979	27.62985039	21.82074976	10.91674232	21.01166284	-1.872175217	0.45073875	0.02882005	0	0.003633707
655	Flood Spring	Spring	Flood	193	19.10426	0	0	0	0	0.01910426	0	-87.15	30.42116992	7.290302396	6.135792494	23.61570024	5.65344679	0.02944689	1820.257392	4166.583452	0.01607448	18.51722479	27.61155033	21.74767542	11.22692239	21.47575784	-1.868024826	0.456945501	0.030144175	0	9.57E-05
656	Flood Spring	Spring	Flood	194	885.96008	0	0	0	0	0.88596008	0	-87.14	30.42118152	6.991195083	4.547117591	24.02864981	5.37897653	0.02774686	2782.855327	5164.171655	0.01609862	18.99327517	27.76940012	21.73969984	12.00208008	23.22228253	-2.288949966	0.460593753	0.030981125	0	6.24E-06
657	Flood Spring	Spring	Flood	195	1668.22463	0	0	0	0	1.66822463	0	-87.13	30.42119229	6.743092537	3.261222541	24.23939991	4.96585851	0.05382331	2974.446602	5417.168772	0.01165573	19.58760023	27.97647524	21.72529984	12.84450769	24.7152527	-2.514100075	0.463063248	0.03136075	0	4.88E-06
658	Flood Spring	Spring	Flood	196	2058.55998	0	0	0	0	2.05855998	0	-87.11	30.42121135	6.503367424	2.217540026	24.05709982	4.82856538	0.08592883	1757.336829	4875.800149	0.02440446	20.45887518	27.71939945	21.71400023	13.95550776	25.50185943	-2.343099594	0.464910746	0.030887275	0	0.000545192
659	Flood Spring	Spring	Flood	197	670.67585	0	0	0	0	0.67067585	0	-87.1	30.42121963	6.458065033	2.519792497	24.13510036	4.85722729	0.136451	1397.045525	4741.090098	0.07550343	20.43529987	27.03894949	21.80282497	13.97723484	24.51915699	-2.332275391	0.46441675	0.030396325	0	0.004355502
660	Flood Spring	Spring	Flood	198	582.22529	0	0	0	0	0.58222529	0	-87.09	30.42122708	6.441057563	3.185554981	24.32124996	5.11122259	0.17724759	1392.582119	4384.187359	0.13766417	19.99585009	25.90342474	21.94502497	13.55479252	22.71786976	-2.376224995	0.463539749	0.029903899	0	0.012883312
661	Flood Spring	Spring	Flood	199	1947.90568	0	0	0	0	1.94790568	0	-87.08	30.4212337	6.418797374	3.818317473	24.53989983	5.30483469	0.08962073	1624.899625	4227.22844	0.06144001	19.15577507	24.33167505	22.13747454	12.7369777	20.51335758	-2.402425289	0.462524496	0.029484449	0	0.007761294
662	Flood Spring	Spring	Flood	200	2070.91715	0	0	0	0	2.07091715	0	-87.06	30.42124445	6.33373487	4.30893743	25.16757488	3.79399221	0.06432493	2036.205332	4003.047327	0.04152657	16.58994961	20.23322487	22.66522503	10.25621474	15.92428744	-2.502349854	0.460497245	0.028959025	0	0.001094187
663	Flood Spring	Spring	Flood	201	338.51672	0	0	0	0	0.33851672	0	-87.05	30.42124858	6.240854979	4.260272503	25.5536499	3.85672339	0.03687511	2018.730499	3791.689342	0.01248011	15.17027497	18.06722498	22.96990013	8.929419994	13.80695248	-2.583749771	0.459624	0.02882795	0	0.001956919
664	Flood Spring	Spring	Flood	202	110.13407	0	0	0	0	0.11013407	0	-87.04	30.42125188	6.108094931	4.150542378	26.02442503	3.70192499	0.03495793	1881.408032	3738.825084	0.0305081	14.07585025	16.40455008	23.22127485	7.967755318	12.2540077	-2.803150177	0.459092498	0.028772225	0	0.003982136
665	Flood Spring	Spring	Flood	203	2261.88783	0	0	0	0	2.26188783	0	-87.03	30.42125434	5.925392389	4.04351747	26.58225012	3.29496881	0.08295562	1528.718976	3567.203861	0.04814751	12.68324995	14.24884987	23.57167482	6.757857561	10.2053324	-3.010575294	0.458382502	0.028722675	0	0.010008428
666	Flood Spring	Spring	Flood	204	0	0	0	0	0	0	0	-87.02	30.42125598	5.663714886	3.976135015	27.17665005	2.30421789	0.04605352	1115.638078	3419.843587	0.01449409	11.30200005	12.08364987	23.94619989	5.63828516	8.107514858	-3.230450153	0.457724996	0.0286981	0	0.016281736
667	Flood Spring	Spring	Flood	205	1405.17284	0	0	0	0	1.40517284	0	-87	30.42125679	5.278907418	3.990509987	27.71837521	1.918764	0.04173626	693.3836064	3285.81818	0.03294152	9.958427668	9.956847429	24.33237457	4.679520249	5.966337442	-3.386000633	0.457139492	0.028690525	0	0.038337901
668	Flood Spring	Spring	Flood	206	2617.01144	12	3	2	1	2.61701144	0.382115257	-86.99	30.42125677	4.924542427	4.039049983	28.10879993	1.63268116	0.13307358	241.1107269	3076.720187	0.09869153	8.705324888	7.968169808	24.70567513	3.780782461	3.929119825	-3.403124809	0.456643261	0.0286936	1	0.016071662
669	Flood Spring	Spring	Flood	207	1783.54525	0	0	0	0	1.78354525	0	-86.98	30.42125591	5.597599864	2.919447012	28.24327469	0.88700843	0.08227101	0	2897.024455	0.06001346	7.619282484	6.256104946	25.032125	2.02168262	3.336657934	-3.211149693	0.456238493	0.028701275	0	0.015152927
670	Flood Spring	Spring	Flood	208	4970.02326	0	0	0	0	4.97002326	0	-87.19	30.43013918	4.864747465	1.142254755	26.89662457	1.13273698	0.05784396	0	1315.634146	0.04885229	3.291977525	0	23.27284956	-1.57276994	-1.142254755	-3.623775005	0.693046495	0.06983385	0	0.38151243
671	Flood Spring	Spring	Flood	209	2591.19375	0	0	0	0	2.59119375	0	-87.18	30.43015411	3.606724977	0.733793259	26.87435055	0.66260659	0.10163522	0	1751.904914	0.05937599	3.19927001	0	23.10963313	-0.407454967	-0.733793259	-3.76471742	0.551294327	0.039268134	0	0.008644711
672	Flood Spring	Spring	Flood	210	646.75832	0	0	0	0	0.64675832	0	-87.17	30.43016821	7.58929491	4.953722596	24.06592464	1.24077077	0.265656	0	2527.416599	0.20062107	10.5283376	13.63877487	22.3607254	2.939042687	8.685052276	-1.705199242	0.502913497	0.03401245	0	0.029286028
673	Flood Spring	Spring	Flood	211	216.78536	0	0	0	0	0.21678536	0	-87.16	30.43018148	7.559295058	5.683174968	23.68732452	5.5216792	0.15224149	646.2957142	3419.954077	0.15100006	17.96917486	27.27080011	21.51552534	10.4098798	21.58762515	-2.171799183	0.457773507	0.0295306	0	0.009655888
674	Flood Spring	Spring	Flood	212	931.47252	0	0	0	0	0.93147252	0	-87.15	30.43019391	7.491122484	5.509987473	23.57595015	5.38502662	0.02140216	1646.180169	4359.396416	0.00971232	18.27222538	27.33252525	21.41752529	10.7811029	21.82253778	-2.158424854	0.461076498	0.03031425	0	0.000211388
675	Flood Spring	Spring	Flood	213	2172.86446	0	0	0	0	2.17286446	0	-87.14	30.43020552	7.302587628	4.595577598	23.78054953	5.03142179	0.04048045	2646.064624	5320.957464	0.00891829	18.85187483	27.58255005	21.43127489	11.5492872	22.98697245	-2.349274635	0.46292726	0.0308188	0	8.09E-06
676	Flood Spring	Spring	Flood	214	0	0	0	0	0	0	0	-87.13	30.4302163	7.094439983	3.622342467	24.01167488	4.42538031	0.04225537	2391.090673	6294.508683	0.00562952	19.49727488	27.79527521	21.48707533	12.40283489	24.17293274	-2.524599552	0.464230001	0.031036075	0	2.11E-05
677	Flood Spring	Spring	Flood	215	1767.96297	0	0	0	0	1.76796297	0	-87.12	30.43022624	6.929462552	2.933459997	24.11487532	3.7783835	0.05359407	1561.638017	6061.546675	0.01428217	19.94990015	27.67995024	21.5482502	13.0204376	24.74649024	-2.566625118	0.465028502	0.03089215	0	0.000385543
678	Flood Spring	Spring	Flood	216	836.40039	0	0	0	0	0.83640039	0	-87.11	30.43023536	6.797407508	2.623392522	24.18640041	3.50296061	0.07183973	944.0549154	5868.330859	0.0107897	20.1803751	27.27075005	21.67657471	13.38296759	24.64735752	-2.509825706	0.464999259	0.030548475	0	0.003570535
679	Flood Spring	Spring	Flood	217	0	0	0	0	0	0	0	-87.1	30.43024364	6.702979922	2.787187517	24.31902504	2.67042297	0.12425291	408.1322849	5658.423079	0.05328273	20.12744999	26.54682493	21.83164978	13.42447007	23.75963742	-2.487375259	0.464418754	0.030129925	0	0.02052808
680	Flood Spring	Spring	Flood	218	2465.96578	0	0	0	0	2.46596578	0	-87.09	30.43025109	6.646999955	3.275819957	24.53134966	1.60819655	0.16886804	392.582119	5354.273043	0.108129	19.67717457	25.36152506	22.01027441	13.03017461	22.0857051	-2.521075249	0.463470004	0.0296957	0	0.016732184
681	Flood Spring	Spring	Flood	219	0	0	0	0	0	0	0	-87.08	30.43025771	6.622722507	3.731535017	24.78577471	3.10244329	0.12461077	867.4604739	5226.528609	0.04754325	18.58468018	23.3552803	22.27196007	11.96195767	19.62374529	-2.51381464	0.462164801	0.02927536	0	0.013966512
682	Flood Spring	Spring	Flood	220	1368.12252	0	0	0	0	1.36812252	0	-87.07	30.43026351	6.612504959	3.981437504	25.08384991	2.5419204	0.12181727	1354.161908	5223.570512	0.03959312	17.08962536	20.96852541	22.58209991	10.4771204	16.98708791	-2.501749992	0.460864753	0.029008975	0	0.002012709
683	Flood Spring	Spring	Flood	221	1358.16265	0	0	0	0	1.35816265	0	-87.06	30.43026847	6.588232517	4.041600108	25.42080021	2.3311097	0.09519819	1482.028074	4965.001891	0.03141021	15.57795	18.66279936	22.89435005	8.989717484	14.62119925	-2.526450157	0.459779754	0.028852575	0	0.001245978
684	Flood Spring	Spring	Flood	222	0	0	0	0	0	0	0	-87.05	30.4302726	6.533759952	3.98347491	25.80087519	2.84568839	0.08307669	2093.933945	4786.078346	0.01128879	14.43520006	16.93850009	23.1401666	7.901440104	12.95502518	-2.660708586	0.459071328	0.028775467	0	0.000571563
685	Flood Spring	Spring	Flood	223	2673.39071	0	0	0	0	2.67339071	0	-87.04	30.4302759	6.445017457	3.880562544	26.24392462	2.57607671	0.08733072	2841.337315	4738.825084	0.02718289	13.45449996	15.44787478	23.36914968	7.009482503	11.56731224	-2.874774933	0.458600499	0.028735875	0	9.27E-05
686	Flood Spring	Spring	Flood	224	0	0	0	0	0	0	0	-87.03	30.43027837	6.324197412	3.775779963	26.74762487	1.9680116	0.06323489	2441.40134	4561.710633	0.06410298	11.86407986	12.99150009	23.77775993	5.539882445	9.215720129	-2.969864941	0.457807201	0.028700601	0	0.000154036
687	Flood Spring	Spring	Flood	225	395.67577	0	0	0	0	0.39567577	0	-87.02	30.43028	6.162315011	3.694855034	27.27132511	1.8810001	0.01947399	2027.020745	4406.953454	0.01734029	10.40849233	10.69756269	24.18767452	4.246177316	7.00270766	-3.083650589	0.457180247	0.02869005	0	0.000608604
688	Flood Spring	Spring	Flood	226	2164.22528	0	0	0	0	2.16422528	0	-87	30.43028081	5.946144938	3.662487507	27.74289989	1.7473542	0.01100374	1588.861775	4285.533442	0.00504464	9.08087492	8.58209753	24.58319998	3.134729981	4.919610023	-3.159699917	0.45666825	0.02869165	0	0.001886015
689	Flood Spring	Spring	Flood	227	1062.06543	0	0	0	0	1.06206543	0	-86.99	30.43028079	5.866932511	3.607942462	28.07947493	1.7109098	0.03110307	1091.807265	4041.47983	0.02208223	7.845967412	6.608834863	24.96217489	1.979034901	3.000892401	-3.117300034	0.456242241	0.028699325	0	0.004287666
690	Flood Spring	Spring	Flood	228	2221.47572	0	0	0	0	2.22147572	0	-86.98	30.43027994	6.502909899	3.274949968	28.20677519	1.71686858	0.06345724	487.3464818	3867.634091	0.05738363	6.802352548	4.959994912	25.28162527	0.299442649	1.685044944	-2.925149918	0.455897748	0.028709275	0	0.003055644
691	Flood Spring	Spring	Flood	229	3876.86316	0	0	0	0	3.87686316	0	-86.97	30.43027825	7.326990008	2.86373502	28.22462511	0.97955845	0.12407738	0	3756.505955	0.09093275	5.971861935	3.74846797	25.50660019	-1.355128074	0.88473295	-2.718024921	0.455611795	0.02871974	0	0.00022985
692	Flood Spring	Spring	Flood	230	3562.4388	1	0	0	1	3.5624388	0.280706577	-87.19	30.43916314	4.874077499	1.127397239	26.87052488	1.20367371	0.05053569	0	2310.630153	0.05109327	3.287723303	0	23.26533318	-1.586354196	-1.127397239	-3.605191708	0.679946005	0.066807965	1	0.04962466
693	Flood Spring	Spring	Flood	231	2433.38016	0	0	0	0	2.43338016	0	-87.18	30.43917807	3.608609974	0.731086746	26.87057495	0.69019628	0.10391473	0	2585.977551	0.07665502	3.199433406	0	23.10993322	-0.409176568	-0.731086746	-3.760641734	0.551597675	0.039315267	0	0.005145386
694	Flood Spring	Spring	Flood	232	861.47764	0	0	0	0	0.86147764	0	-87.17	30.43919218	7.692664862	4.781390071	23.95972538	1.27956562	0.25181448	0	3164.716734	0.19763134	14.43159571	21.12162018	21.69437981	6.738930845	16.34023011	-2.265345573	0.478737593	0.03165198	0	0.017744534
695	Flood Spring	Spring	Flood	233	1660.27833	0	0	0	0	1.66027833	0	-87.16	30.43920545	7.68443501	5.015974998	23.79697466	5.34411959	0.08567917	578.8716387	3916.631887	0.09694712	17.3665247	26.37067556	21.23382521	9.682089686	21.35470057	-2.563149452	0.462584004	0.03019535	0	0.021109487
696	Flood Spring	Spring	Flood	234	2020.93317	0	0	0	0	2.02093317	0	-87.15	30.43921789	7.640009999	4.841355085	23.77232504	5.39997571	0.02793868	1540.025913	4759.018446	0.00673456	17.76422548	26.50787544	21.1552496	10.12421548	21.66652036	-2.617075443	0.46398551	0.03047905	0	0.000850626
697	Flood Spring	Spring	Flood	235	2037.3415	0	0	0	0	2.0373415	0	-87.14	30.4392295	7.528707623	4.272232413	23.91062498	4.8780668	0.03296034	2454.802279	5653.008738	0.00313508	18.52782488	26.98462486	21.17710018	10.99911726	22.71239245	-2.733524799	0.464621499	0.030637825	0	3.97E-05
698	Flood Spring	Spring	Flood	236	1544.96764	0	0	0	0	1.54496764	0	-87.13	30.43924028	7.379274964	3.569594979	24.11310053	4.33195409	0.03230257	2081.505495	6577.59523	0.00196535	19.13219976	27.17632532	21.3118	11.7529248	23.60673034	-2.801300526	0.465036757	0.030662725	0	0.000148579
699	Flood Spring	Spring	Flood	237	1568.58146	0	0	0	0	1.56858146	0	-87.12	30.43925023	7.23033011	2.992172539	24.27902508	3.6245506	0.06435125	1090.323852	7028.9564	0.02883948	19.34491959	26.7185997	21.55969963	12.11458948	23.72642716	-2.719325447	0.465220201	0.0304334	0	0.004144667
700	Flood Spring	Spring	Flood	238	0	0	0	0	0	0	0	-87.11	30.43925935	7.088510036	2.703215003	24.39495039	2.36466238	0.10034719	170.6489865	6863.030457	0.05139613	19.26822472	25.90017462	21.85024977	12.17971468	23.19695961	-2.544700623	0.464857742	0.0300613	0	0.035445659
701	Flood Spring	Spring	Flood	239	0	0	0	0	0	0	0	-87.1	30.43926764	7.267867446	2.545762509	26.42904949	1.25846431	0.13190629	0	6592.952249	0.09390581	16.35311747	19.58715975	24.12042522	9.08525002	17.04139724	-2.308624268	0.530294754	0.034379675	0	0.049315859
702	Flood Spring	Spring	Flood	240	1404.77293	0	0	0	0	1.40477293	0	-87.09	30.43927509	7.153744936	2.953680009	26.62290049	0.90155189	0.09491088	0	6333.670409	0.07100897	15.91108036	18.35466999	24.29675007	8.757335424	15.40098998	-2.326150417	0.52913475	0.0340395	0	0.02112404
703	Flood Spring	Spring	Flood	241	2283.6484	0	0	0	0	2.2836484	0	-87.08	30.43928172	6.777755022	3.628027558	25.00277567	2.19572614	0.09287435	148.4840174	6226.053511	0.06640387	17.69880009	21.93417501	22.46392536	10.92104506	18.30614746	-2.538850307	0.461481489	0.02908565	0	0.061571388
704	Flood Spring	Spring	Flood	242	2051.01674	0	0	0	0	2.05101674	0	-87.07	30.43928751	6.814460039	3.748777509	25.327775	1.24114531	0.09902541	354.1619078	6217.496962	0.05633372	15.90177512	19.15964985	22.83717489	9.087315083	15.41087234	-2.490600109	0.459997252	0.028886875	0	0.009125493
705	Flood Spring	Spring	Flood	243	0	0	0	0	0	0	0	-87.06	30.43929247	6.838950038	3.749797523	25.67512512	1.7270965	0.03756037	689.3654654	5939.450853	0.03722846	14.36300015	16.84395003	23.15937471	7.524050117	13.09415251	-2.515750408	0.458892249	0.028778625	0	0.005471775
706	Flood Spring	Spring	Flood	244	2093.23897	0	0	0	0	2.09323897	0	-87.05	30.43929661	6.837120056	3.680575013	26.04799986	1.88357949	0.02299009	1615.526357	5782.402944	0.01951758	13.22517514	15.12907505	23.41397476	6.388055086	11.44850004	-2.634025097	0.458233751	0.028728275	0	0.000598861
707	Flood Spring	Spring	Flood	245	482.56827	0	0	0	0	0.48256827	0	-87.04	30.43929991	6.809292555	3.582445025	26.45970011	1.8345015	0.01595159	2583.600582	5719.990037	0.0143052	12.13082504	13.45022511	23.68735027	5.321532488	9.867780089	-2.772349834	0.457716003	0.028702925	0	5.89E-05
708	Flood Spring	Spring	Flood	246	43.88823	0	0	0	0	0.04388823	0	-87.03	30.43930238	6.76831007	3.477065027	26.90467501	1.7761232	0.00409905	3349.481713	5546.771192	0.00203222	10.84922504	11.45620012	24.03419971	4.080914974	7.979135096	-2.870475292	0.457130745	0.028691525	0	1.14E-05
709	Flood Spring	Spring	Flood	247	2337.03493	0	0	0	0	2.33703493	0	-87.02	30.43930402	6.736060023	3.372565031	27.35084963	1.8062393	0.00204687	2929.379874	5391.502693	0.00070591	9.551059961	9.397707462	24.41382551	2.814999938	6.025142431	-2.937024117	0.456620745	0.0286917	0	4.03E-05
710	Flood Spring	Spring	Flood	248	222.8881	0	0	0	0	0.2228881	0	-87	30.43930482	6.750779986	3.267067492	27.74392509	1.83279291	0.00613477	2465.476831	5285.335118	0.0021178	8.260304928	7.327614903	24.81074953	1.509524941	4.060547411	-2.933175564	0.456190251	0.028698625	0	0.000106019
711	Flood Spring	Spring	Flood	249	105.09135	0	0	0	0	0.10509135	0	-86.99	30.4393048	6.946934938	3.109700024	28.02507544	1.90600871	0.00822104	1894.903929	5020.050928	0.00150215	7.07473743	5.41770494	25.18550014	0.127802491	2.308004916	-2.839575291	0.455841996	0.028708725	0	0.000248995
712	Flood Spring	Spring	Flood	250	2461.80723	0	0	0	0	2.46180723	0	-86.98	30.43930395	7.481590152	2.823532522	28.16592503	1.9901102	0.01612319	1157.494545	4848.358299	0.00746811	6.123354912	3.905292511	25.483675	-1.35823524	1.081759989	-2.682250023	0.455571502	0.02871935	0	0.000420534
713	Flood Spring	Spring	Flood	251	1883.69689	0	0	0	0	1.88369689	0	-86.97	30.43930226	7.974632382	2.545727491	28.21919966	1.99042618	0.04742016	484.4727848	4711.921773	0.06259547	5.444652557	2.999112487	25.64327526	-2.529979825	0.453384995	-2.575924397	0.455365747	0.02872895	0	0.000352629
714	Flood Spring	Spring	Flood	252	3781.75273	0	0	0	0	3.78175273	0	-86.96	30.43929975	7.980380058	2.440269947	28.25497484	0.8589271	0.12147668	0	4451.577783	0.0867234	4.95718503	2.706167519	25.64575005	-3.023195028	0.265897572	-2.609224796	0.455209248	0.028737	0	5.10E-05
715	Flood Spring	Spring	Flood	253	0	0	0	0	0	0	0	-86.95	30.4392964	6.402092457	0.944985986	28.27252483	0.21139268	0.02193528	0	4331.51408	0.01989716	3.480039895	0.658742487	23.62755013	-2.922052562	-0.286243498	-4.644974709	0.653924018	0.043516099	0	0.017199601
716	Flood Spring	Spring	Flood	254	0	0	0	0	0	0	0	-86.92	30.43928137	5.917195082	0.476163246	28.27492476	0.71302371	0.0346087	0	4130.90142	0.03557245	3.120549917	0	22.97109985	-2.796645164	-0.476163246	-5.303824902	0.720206022	0.048440199	0	0.059427165
717	Flood Spring	Spring	Flood	255	3901.92023	0	0	0	0	3.90192023	0	-86.91	30.4392747	6.324415088	0.408537999	27.68384981	0.94168137	0.0262525	0	3979.331042	0.04527175	3.315274954	1.24000001	23.72054958	-3.009140134	0.831462011	-3.963300228	0.587539509	0.03859775	0	0.011737066
718	Flood Spring	Spring	Flood	256	2496.14368	0	0	0	0	2.49614368	0	-86.9	30.4392672	6.32545507	0.409118749	27.68565035	0.84543668	0.01281471	0	3970.901269	0.00728237	3.315274954	1.24000001	23.72054958	-3.010180116	0.83088126	-3.965100765	0.587539509	0.03859775	0	0.015236699
719	Flood Spring	Spring	Flood	257	0	0	0	0	0	0	0	-86.89	30.43925886	6.528197527	0.374822006	27.38862514	0.69045647	0.03224686	0	3931.621417	0.01317979	3.412637472	1.860000014	24.09527445	-3.115560055	1.485178009	-3.293350697	0.521206252	0.033676525	0	0.003409322
720	Flood Spring	Spring	Flood	258	1654.1297	0	0	0	0	1.6541297	0	-87.2	30.44817132	3.675707579	0.769550264	26.70467472	1.09552065	0.03176929	0	3304.059249	0.02314148	3.281804979	0	23.25492477	-0.3939026	-0.769550264	-3.449749947	0.651868507	0.061381901	0	0.012220621
721	Flood Spring	Spring	Flood	259	5015.43696	0	0	0	0	5.01543696	0	-87.19	30.44818709	3.633560002	0.742971256	26.80765009	1.12691604	0.06698542	0	3308.644768	0.04619439	3.229633252	0	23.16306686	-0.40392675	-0.742971256	-3.644583225	0.591465334	0.047847432	0	0.00935514
722	Flood Spring	Spring	Flood	260	481.63533	0	0	0	0	0.48163533	0	-87.18	30.44820203	3.611332536	0.725455254	26.86505032	0.68156131	0.0586738	0	3506.479487	0.02405826	3.19938755	0	23.10982513	-0.411944985	-0.725455254	-3.755225182	0.551890001	0.039347725	0	0.008946549
723	Flood Spring	Spring	Flood	261	292.94287	0	0	0	0	0.29294287	0	-87.17	30.44821614	5.693185091	2.584044725	25.44850016	0.63911388	0.17679277	0	3954.336152	0.17596539	9.570637405	12.34537506	22.19460011	3.877452314	9.761330336	-3.253900051	0.507335752	0.034661775	0	0.008578118
724	Flood Spring	Spring	Flood	262	771.77063	0	0	0	0	0.77177063	0	-87.16	30.44822941	7.783092618	4.360144973	24.03220034	4.81156412	0.1861516	219.0266256	4578.394171	0.15695573	15.87839985	24.52174997	21.23867464	8.095307231	20.161605	-2.793525696	0.464136496	0.030221775	0	0.087261581
725	Flood Spring	Spring	Flood	263	0	0	0	0	0	0	0	-87.15	30.44824186	7.767140031	4.109190106	24.09995031	5.4251961	0.04172498	1077.593947	5318.515956	0.01858181	16.16009998	24.62984991	21.17297459	8.392959952	20.5206598	-2.926975727	0.464826509	0.0302897	0	0.00976846
726	Flood Spring	Spring	Flood	264	0	0	0	0	0	0	0	-87.14	30.44825348	7.707502604	3.688642442	24.24415016	4.75032909	0.05032357	1936.504903	6131.918724	0.00953881	17.42952538	25.68712521	21.08885002	9.722022772	21.99848276	-3.15530014	0.465213999	0.030331575	0	0.000664383
727	Flood Spring	Spring	Flood	265	547.0034	0	0	0	0	0.5470034	0	-87.13	30.44826426	7.614744902	3.188672483	24.43307543	4.15315981	0.03984805	2053.865747	6993.473991	0.00516706	18.2197752	26.04267502	21.25600052	10.6050303	22.85400254	-3.177074909	0.465375997	0.0302583	0	0.000534643
728	Flood Spring	Spring	Flood	266	1934.30843	0	0	0	0	1.93430843	0	-87.12	30.44827421	7.512762666	2.754419982	24.61324978	3.47701271	0.06940641	1053.865747	7337.965256	0.03815922	17.66097498	24.82127523	21.73757505	10.14821231	22.06685525	-2.875674725	0.465294249	0.030003125	0	0.009313275
729	Flood Spring	Spring	Flood	267	1395.4463	0	0	0	0	1.3954463	0	-87.11	30.44828333	7.412567496	2.489829957	24.75615025	1.64086277	0.117518	53.86574732	7208.592746	0.03584788	17.09822464	23.5968504	22.18517494	9.685657144	21.10702044	-2.570975304	0.465012252	0.02973935	0	0.024165212
730	Flood Spring	Spring	Flood	268	0	0	0	0	0	0	0	-87.1	30.44829162	8.278800011	1.773147494	32.29252434	0.49022976	0.02620423	0	7195.092881	0.01086653	7.396982431	2.222212553	30.49952507	-0.881817579	0.449065059	-1.792999268	0.728714257	0.048164401	0	3.17E-08
731	Flood Spring	Spring	Flood	269	199.92207	0	0	0	0	0.19992207	0	-87.08	30.44830571	7.557132363	2.656530052	28.69724989	0.50265051	0.0689525	0	7225.709886	0.06365154	12.40726471	11.87696248	26.49567461	4.850132346	9.220432431	-2.201575279	0.595001489	0.038612925	0	0.000919198
732	Flood Spring	Spring	Flood	270	0	0	0	0	0	0	0	-87.07	30.4483115	7.313407421	3.091315001	27.26977444	0.6670049	0.05470765	0	7164.433389	0.03227524	12.84856725	13.56530702	24.93149996	5.535159826	10.47399202	-2.338274479	0.526468493	0.0336609	0	0.004854774
733	Flood Spring	Spring	Flood	271	1046.91222	0	0	0	0	1.04691222	0	-87.06	30.44831647	7.086329937	3.469937444	25.97187471	1.8155128	0.06350104	462.6675834	6915.441635	0.04780508	13.3456502	15.36637473	23.37800026	6.259320259	11.89643729	-2.593874454	0.458108	0.028755075	0	0.01380074
734	Flood Spring	Spring	Flood	272	1420.78051	0	0	0	0	1.42078051	0	-87.05	30.4483206	7.126875043	3.390462518	26.31974983	1.91028029	0.01704788	1459.450607	6777.127538	0.00569546	12.27651997	13.75835991	23.62248001	5.149644923	10.36789739	-2.697269821	0.457471997	0.02871816	0	0.00107602
735	Flood Spring	Spring	Flood	273	0	0	0	0	0	0	0	-87.04	30.44832391	7.146472454	3.296494961	26.68924952	1.733007	0.00862779	2456.327861	6694.329728	0.0034127	11.47177529	12.50707483	23.83277512	4.325302839	9.210579872	-2.8564744	0.457141496	0.02870155	0	8.33E-05
736	Flood Spring	Spring	Flood	274	1980.14768	0	0	0	0	1.98014768	0	-87.03	30.44832638	7.158600092	3.195500016	27.07699966	1.71643	0.00583984	3454.512893	6536.370354	0.000551	10.31343484	10.70595026	24.15082502	3.154834747	7.510450244	-2.926174641	0.45663175	0.028696475	0	8.63E-06
737	Flood Spring	Spring	Flood	275	544.08589	0	0	0	0	0.54408589	0	-87.02	30.44832802	7.191717505	3.087119937	27.45949984	1.8026558	0.00516184	3823.098472	6377.041409	0.00114342	9.120110035	8.814177513	24.50442505	1.928392529	5.727057576	-2.955074787	0.4561975	0.028699675	0	4.76E-06
738	Flood Spring	Spring	Flood	276	45.0052	0	0	0	0	0.0450052	0	-87	30.44832882	7.290685058	2.962334991	27.79822493	1.89862981	0.00803393	3305.809337	6238.807547	0.00221176	7.911982536	6.88015008	24.87927532	0.621297479	3.917815089	-2.918949604	0.455839999	0.028707625	0	1.36E-05
739	Flood Spring	Spring	Flood	277	2588.80145	0	0	0	0	2.58880145	0	-86.99	30.4483288	7.521327496	2.798385024	28.05107546	2.04464389	0.01149174	2566.873638	6005.685925	0.00089005	6.781607628	5.075494885	25.23534966	-0.739719868	2.277109861	-2.815725803	0.455557495	0.028717575	0	4.94E-05
740	Flood Spring	Spring	Flood	278	0	0	0	0	0	0	0	-86.98	30.44832795	7.88961494	2.585900009	28.19645023	2.16264239	0.0117577	1896.640789	5835.628752	0.00194774	5.859629869	3.6549775	25.51287508	-2.02998507	1.069077492	-2.683575153	0.455343246	0.028727525	0	0.000106256
741	Flood Spring	Spring	Flood	279	760.02154	0	0	0	0	0.76002154	0	-86.97	30.44832626	8.131654978	2.41210252	28.26072502	2.13393129	0.01518855	1184.809635	5665.402783	0.00549163	5.188507557	2.82822752	25.64970016	-2.943147421	0.416125	-2.611024857	0.455183499	0.028736375	0	0.000222848
742	Flood Spring	Spring	Flood	280	4553.08316	0	0	0	0	4.55308316	0	-86.96	30.44832374	8.009277582	2.344897509	28.29239988	1.90290114	0.04366295	480.2430433	5436.556609	0.05989163	4.689297557	2.582407475	25.63497496	-3.319980025	0.237509966	-2.657424927	0.4550635	0.028743625	0	0.000390754
743	Flood Spring	Spring	Flood	281	3225.07078	0	0	0	0	3.22507078	0	-86.95	30.44832039	7.71794498	2.276262462	28.3043499	0.9950131	0.11949181	0	5326.07653	0.07843745	4.268404961	2.652157485	25.54257488	-3.449540019	0.375895023	-2.761775017	0.454973496	0.02874915	0	0.000216368
744	Flood Spring	Spring	Flood	282	0	0	0	0	0	0	0	-86.94	30.44831622	6.27929008	0.896939486	28.27810001	0.30740439	0.04156409	0	5281.254941	0.06152758	3.500644982	1.424800038	24.19832468	-2.778645098	0.527860552	-4.079775333	0.587561511	0.0385964	0	0.007952078
745	Flood Spring	Spring	Flood	283	6754.26867	0	0	0	0	6.75426867	0	-86.92	30.44830536	6.462212563	0.482953496	27.49014997	1.19168692	0.13794958	0	5105.890649	0.07561535	3.443244994	1.988027513	24.30504942	-3.018967569	1.505074017	-3.185100555	0.521206252	0.033676525	0	0.006502395
746	Flood Spring	Spring	Flood	284	2790.94744	0	0	0	0	2.79094744	0	-86.91	30.44829869	6.15031743	0.45909325	28.02970028	0.79735737	0.04437517	0	4977.637802	0.05198221	3.315274954	1.24000001	23.72054958	-2.835042477	0.780906759	-4.309150696	0.587539509	0.03859775	0	0.014375181
747	Flood Spring	Spring	Flood	285	554.61725	0	0	0	0	0.55461725	0	-86.9	30.44829118	6.150272489	0.459035255	28.02965021	0.82683226	0.01008513	0	4970.901269	0.003516	3.217912436	0.620000005	23.34582472	-2.932360053	0.16096475	-4.683825493	0.653872766	0.043518974	0	0.044354303
748	Flood Spring	Spring	Flood	286	0	0	0	0	0	0	0	-87.2	30.45719525	3.658549964	0.694157258	26.77559996	1.21560935	0.03587679	0	4304.059249	0.01749692	3.22615248	0	23.15695	-0.432397485	-0.694157258	-3.61864996	0.579020739	0.045234725	0	0.010521208
749	Flood Spring	Spring	Flood	287	2233.82024	0	0	0	0	2.23382024	0	-87.16	30.45725337	7.874392509	3.698577464	24.35857487	2.52082702	0.30046793	0	5346.310465	0.19541598	13.33752513	21.38747501	21.59212542	5.46313262	17.68889755	-2.766449451	0.464883246	0.03008275	0	0.043676362
750	Flood Spring	Spring	Flood	288	2081.34163	0	0	0	0	2.08134163	0	-87.15	30.45726582	7.886257529	3.381687462	24.50882483	4.29640091	0.08991579	617.04138	5992.324621	0.0356734	13.15332508	21.1173749	21.62817478	5.267067552	17.73568743	-2.880650043	0.465202242	0.0300354	0	0.034298618
751	Flood Spring	Spring	Flood	289	830.98037	0	0	0	0	0.83098037	0	-87.14	30.45727744	7.86443007	3.039920032	24.67842531	3.97007629	0.04594515	1573.870955	6725.538874	0.02538688	14.82389998	22.82077456	21.40140009	6.959469914	19.78085452	-3.277025223	0.465388246	0.03000395	0	0.002539197
752	Flood Spring	Spring	Flood	290	0	0	0	0	0	0	0	-87.13	30.45728822	7.817947388	2.679660022	24.86979961	3.7751708	0.01584743	2123.106799	6658.638979	0.01278546	16.22427511	23.98085022	21.40529966	8.406327724	21.3011902	-3.46449995	0.465438753	0.029896975	0	0.000753252
753	Flood Spring	Spring	Flood	291	0	0	0	0	0	0	0	-87.12	30.45729818	7.763790131	2.359972477	25.06102467	3.4066585	0.04704748	1144.682311	6360.467619	0.01926987	14.69160032	21.72642565	22.17889977	6.927810192	19.36645317	-2.882124901	0.465339243	0.0296511	0	0.007414382
754	Flood Spring	Spring	Flood	292	1098.67611	0	0	0	0	1.09867611	0	-87.11	30.4573073	7.717625141	2.131484956	25.23327494	2.3617872	0.09046192	228.050299	6210.766749	0.03306712	13.59017539	19.90689993	22.79020023	5.872550249	17.77541497	-2.443074703	0.465168498	0.02942115	0	0.027228686
755	Flood Spring	Spring	Flood	293	66.12234	0	0	0	0	0.06612234	0	-87.1	30.4573156	8.154417634	1.809247524	30.59014988	0.63345529	0.09592806	0	6195.092881	0.08639058	9.636532545	9.9788571	26.87030029	1.482114911	8.169609576	-3.719849586	0.596919	0.038700376	0	0.003110707
756	Flood Spring	Spring	Flood	294	0	0	0	0	0	0	0	-87.07	30.45733549	7.737757564	2.501297444	29.14054966	0.43555215	0.05086962	0	6697.558724	0.06201196	10.12264013	8.476959944	26.92982483	2.384882569	5.9756625	-2.210724831	0.593167998	0.038465675	0	0.000199518
757	Flood Spring	Spring	Flood	295	2288.03382	0	0	0	0	2.28803382	0	-87.06	30.45734045	7.32103765	3.215697527	26.3265748	2.1558295	0.09180232	387.4562288	7136.275474	0.08073431	12.23214984	13.76222491	23.6178503	4.911112189	10.54652739	-2.708724499	0.457245499	0.028741775	0	0.038119122
758	Flood Spring	Spring	Flood	296	1161.14082	0	0	0	0	1.16114082	0	-87.04	30.45734789	7.417085052	3.051182508	26.93214989	1.6376001	0.00732161	2291.017008	7674.620078	0.00409027	10.8206749	11.60012507	23.97117472	3.403589845	8.548942566	-2.96097517	0.456555501	0.028708425	0	0.000154046
759	Flood Spring	Spring	Flood	297	1499.2467	0	0	0	0	1.4992467	0	-87.03	30.45735036	7.446545005	2.960905015	27.26342535	1.7090434	0.00867947	3232.419358	7526.59186	0.00212301	9.829552412	10.06226492	24.2465744	2.383007407	7.101359904	-3.016850948	0.456138507	0.0287068	0	1.99E-05
760	Flood Spring	Spring	Flood	298	0	0	0	0	0	0	0	-87.02	30.457352	7.482829928	2.864117503	27.59584999	1.8495364	0.00980609	3526.038157	7364.531166	0.00157043	8.789622545	8.419932485	24.55697489	1.306792617	5.555814981	-3.038875103	0.45579426	0.0287109	0	1.32E-05
761	Flood Spring	Spring	Flood	299	2325.64926	0	0	0	0	2.32564926	0	-87	30.45735281	7.553910017	2.754180014	27.90405035	1.9724981	0.00832889	2944.424177	7196.531923	0.00206662	7.712805033	6.713872314	24.88984966	0.158895016	3.959692299	-3.014200687	0.455521248	0.028718175	0	4.25E-05
762	Flood Spring	Spring	Flood	300	450.2388	0	0	0	0	0.4502388	0	-86.99	30.45735279	7.691110015	2.62479502	28.15164995	2.1228384	0.01076855	2324.646429	6995.399598	0.00112729	6.667540073	5.089322567	25.20967484	-1.023569942	2.464527547	-2.941975117	0.45531375	0.02872655	0	0.000133695
763	Flood Spring	Spring	Flood	301	39.12105	0	0	0	0	0.03912105	0	-86.98	30.45735193	7.887869954	2.485934973	28.29744959	2.2723055	0.00722733	1683.634592	6826.605867	0.00287754	5.780597568	3.782452464	25.46137476	-2.107272387	1.296517491	-2.836074829	0.455161743	0.028734625	0	0.000362159
764	Flood Spring	Spring	Flood	302	2416.02628	0	0	0	0	2.41602628	0	-86.97	30.45735025	8.011757374	2.376402497	28.34275007	2.1910905	0.01519053	1118.836549	6623.850684	0.00438203	5.141379952	2.989112496	25.59382534	-2.870377421	0.612709999	-2.748924732	0.455052502	0.0287417	0	0.00057209
765	Flood Spring	Spring	Flood	303	860.23674	0	0	0	0	0.86023674	0	-86.96	30.45734773	7.915867448	2.308272481	28.34342527	1.9613695	0.02426635	635.4930187	6426.069028	0.01917893	4.661830068	2.681620002	25.60097504	-3.25403738	0.373347521	-2.742450237	0.454973251	0.028747475	0	0.00082007
766	Flood Spring	Spring	Flood	304	2470.18957	0	0	0	0	2.47018957	0	-86.95	30.45734438	7.61905241	2.228457451	28.32924986	1.67506564	0.07975275	221.2414002	6322.353275	0.05287366	4.224199891	2.698165059	25.52375031	-3.394852519	0.469707608	-2.805499554	0.454917498	0.0287517	0	0.001307508
767	Flood Spring	Spring	Flood	305	5515.35579	0	0	0	0	5.51535579	0	-86.94	30.4573402	7.119847536	2.054462522	28.27737474	1.2090683	0.15115013	0	6281.169278	0.09194578	3.84472003	2.87565403	25.41743965	-3.275127506	0.821191508	-2.859935093	0.454896992	0.02875356	0	0.00145694
768	Flood Spring	Spring	Flood	306	6620.0747	0	0	0	0	6.6200747	0	-86.93	30.45733518	6.389532566	1.317243516	28.10889959	1.09682925	0.16692067	0	6226.052023	0.08780467	3.497429967	3.010029972	25.18489981	-2.892102599	1.692786455	-2.923999786	0.454874501	0.0287551	0	0.004535872
769	Flood Spring	Spring	Flood	307	1783.33792	0	0	0	0	1.78333792	0	-86.92	30.45732934	6.09228003	0.669205494	28.19197464	0.76658213	0.08234735	0	6088.383373	0.07327469	3.221762419	0.716374993	23.48219967	-2.870517612	0.047169499	-4.709774971	0.65387252	0.043518974	0	0.036986103
770	Flood Spring	Spring	Flood	308	508.21647	0	0	0	0	0.50821647	0	-87.16	30.4662773	5.798039794	1.794148803	25.8453002	0.6902837	0.11734876	0	6180.969017	0.1200966	6.427424848	8.309025049	22.72372532	0.629385054	6.514876246	-3.121574879	0.506990016	0.03420255	0	0.010848291
771	Flood Spring	Spring	Flood	309	567.21483	0	0	0	0	0.56721483	0	-87.15	30.46628976	7.990579963	2.678599954	24.97125006	3.2374418	0.12915026	377.843646	6747.540053	0.12106728	8.958547711	15.92485046	22.53179979	0.967967749	13.24625051	-2.439450264	0.4653235	0.029752925	0	0.047408589
772	Flood Spring	Spring	Flood	310	1279.88526	0	0	0	0	1.27988526	0	-87.14	30.46630138	7.990842342	2.403827488	25.15762472	3.6801657	0.01499511	1377.843646	6227.882311	0.0204694	9.765174747	17.06027532	22.4429245	1.774332404	14.65644783	-2.714700222	0.465423249	0.02968985	0	0.004337553
773	Flood Spring	Spring	Flood	311	2057.55826	0	0	0	0	2.05755826	0	-87.13	30.46631217	7.975332379	2.145094961	25.35732508	3.5834811	0.02728681	2377.843646	5739.97276	0.0207025	10.83985519	18.19227552	22.45895052	2.864522815	16.04718056	-2.898374557	0.465444744	0.029572951	0	0.000246112
774	Flood Spring	Spring	Flood	312	2091.23479	0	0	0	0	2.09123479	0	-87.12	30.46632213	7.950682521	1.91840753	25.55837488	3.31924289	0.04827923	1521.020266	5391.230154	0.01569491	9.750467539	16.42759991	23.12834978	1.799785018	14.50919238	-2.430025101	0.46537625	0.029350075	0	0.002380808
775	Flood Spring	Spring	Flood	313	1783.40165	0	0	0	0	1.78340165	0	-87.11	30.46633126	7.925122499	1.743892491	25.74647474	2.71881181	0.03841014	589.3733168	5213.773859	0.01185526	9.234937429	15.07050014	23.65037489	1.30981493	13.32660764	-2.096099854	0.465281747	0.029152275	0	0.016977295
776	Flood Spring	Spring	Flood	314	1192.07349	0	0	0	0	1.19207349	0	-87.1	30.46633956	8.086732626	1.703000009	29.07380009	1.0674667	0.14152388	0	5195.092881	0.10664376	8.197427392	8.258837461	27.13950014	0.110694766	6.555837452	-1.934299946	0.5969145	0.03860345	0	0.00082456
777	Flood Spring	Spring	Flood	315	0	0	0	0	0	0	0	-87.07	30.46635945	7.810212255	2.382522523	29.31212473	0.36144064	0.02842842	0	5784.727777	0.02694803	8.406935096	4.918022573	28.60492468	0.596722841	2.53550005	-0.70720005	0.660609007	0.043311424	0	2.32E-06
778	Flood Spring	Spring	Flood	316	2075.80001	0	0	0	0	2.07580001	0	-87.06	30.46636442	7.512845039	3.006099999	26.69682455	1.9432693	0.13066792	70.29368101	6286.419962	0.10295941	11.16074991	12.22095013	23.85327482	3.647904873	9.214850128	-2.843549728	0.456420749	0.028735225	0	0.052831092
779	Flood Spring	Spring	Flood	317	278.79639	0	0	0	0	0.27879639	0	-87.05	30.46636856	7.567037463	2.934457481	26.91925001	2.0681326	0.04315866	1006.494447	6897.346528	0.0167103	10.5694499	11.34535003	23.9930501	3.002412438	8.410892546	-2.926199913	0.456052251	0.0287281	0	0.007339325
780	Flood Spring	Spring	Flood	318	2243.6292	0	0	0	0	2.2436292	0	-87.04	30.46637186	7.605152607	2.861567557	27.16965008	1.779406	0.0178997	1914.089299	7434.089612	0.00514378	10.2075851	10.75867486	24.09990025	2.602432489	7.897107303	-3.069749832	0.455991752	0.028719299	0	0.000629909
781	Flood Spring	Spring	Flood	319	0	0	0	0	0	0	0	-87.03	30.46637434	7.626049995	2.787019968	27.44350004	1.84551251	0.01366366	2812.866821	7204.941879	0.00158081	9.404987574	9.518394947	24.32525015	1.778937578	6.731374979	-3.118249893	0.455676496	0.0287197	0	8.45E-05
782	Flood Spring	Spring	Flood	320	1705.80104	0	0	0	0	1.70580104	0	-87.02	30.46637598	7.633354902	2.708547473	27.73104954	1.9644347	0.00695828	2629.379568	7021.533431	0.0040893	8.537759781	8.159462452	24.5848999	0.904404879	5.450914979	-3.146149635	0.455429494	0.0287234	0	0.000141377
783	Flood Spring	Spring	Flood	321	714.98602	0	0	0	0	0.71498602	0	-87	30.46637678	7.635112524	2.621747494	28.02115011	1.96345631	0.00782951	2172.244066	6975.278182	0.00417745	7.604480028	6.708225131	24.86950016	-0.030632496	4.086477637	-3.151649952	0.455247745	0.028728724	0	0.000275059
784	Flood Spring	Spring	Flood	322	2525.30851	0	0	0	0	2.52530851	0	-86.98	30.46637591	7.725740075	2.433307528	28.4375	2.18923231	0.01555661	920.6163565	7075.142782	0.01163905	5.78954494	4.071894944	25.38087511	-1.936195135	1.638587415	-3.056624889	0.45503851	0.02873955	0	0.00266282
785	Flood Spring	Spring	Flood	323	793.86549	0	0	0	0	0.79386549	0	-86.97	30.46637422	7.846549988	2.361640036	28.43827534	1.92624947	0.06433804	275.8368044	7302.681759	0.06994157	5.23695755	3.322567523	25.51502514	-2.609592438	0.960927486	-2.923250198	0.454985	0.0287439	0	0.002658496
786	Flood Spring	Spring	Flood	324	1148.65253	0	0	0	0	1.14865253	0	-86.96	30.4663717	7.832659841	2.299137473	28.3925252	1.0573496	0.09379058	0	7418.394606	0.06445536	4.408017337	2.199287474	24.91257477	-3.424642503	-0.099849999	-3.479950428	0.521261252	0.0336708	0	0.003507482
787	Flood Spring	Spring	Flood	325	418.46088	0	0	0	0	0.41846088	0	-86.95	30.46636835	6.782767415	1.357458241	28.34097528	0.69601864	0.03867207	0	7319.645529	0.02532981	3.444184959	0.683239996	23.61452484	-3.338582456	-0.674218245	-4.726450443	0.653883263	0.043517924	0	0.065034383
788	Flood Spring	Spring	Flood	326	0	0	0	0	0	0	0	-87.16	30.47530123	6.940122485	1.819289967	25.68977499	0.73506303	0.07728551	0	6681.267693	0.05040825	4.808122575	5.847374916	23.16532516	-2.13199991	4.028084949	-2.524449825	0.506405748	0.033891925	0	0.042478767
789	Flood Spring	Spring	Flood	327	2677.04529	0	0	0	0	2.67704529	0	-87.15	30.47531369	8.055685043	2.036807448	25.4300251	1.98560579	0.0927103	393.2506177	6078.228058	0.07225525	5.252305031	10.50550985	23.53505039	-2.803380013	8.468702406	-1.894974709	0.465349495	0.0294956	0	0.01890898
790	Flood Spring	Spring	Flood	328	2070.1082	0	0	0	0	2.0701082	0	-87.14	30.47532532	8.065887451	1.80823499	25.63689995	2.77927729	0.07908795	1272.135899	5416.787762	0.02410009	4.037338066	9.86726799	23.82830009	-4.028549385	8.059033	-1.808599854	0.465412802	0.0293927	0	0.004826293
791	Flood Spring	Spring	Flood	329	269.68316	0	0	0	0	0.26968316	0	-87.13	30.47533611	8.069627523	1.630977482	25.85212517	2.87252271	0.0473984	1927.139053	4851.962903	0.00388429	4.451869905	11.00503755	23.84872484	-3.617757618	9.374060065	-2.003400326	0.465437502	0.0293098	0	0.000871188
792	Flood Spring	Spring	Flood	330	0	0	0	0	0	0	0	-87.12	30.47534608	8.061282396	1.488782495	26.06482553	2.5388177	0.0581365	1597.658791	4435.670953	0.00580184	4.189085007	10.12153244	24.28410006	-3.87219739	8.632749945	-1.780725479	0.465411499	0.02912025	0	0.00164605
793	Flood Spring	Spring	Flood	331	364.46787	0	0	0	0	0.36446787	0	-87.11	30.47535521	8.038069963	1.375382513	26.26032448	2.079544	0.04401555	679.6288076	4218.204842	0.01705438	4.8738451	9.694912434	24.58239985	-3.164224863	8.319529921	-1.677924633	0.465366751	0.028953825	0	0.008116308
794	Flood Spring	Spring	Flood	332	1582.21651	0	0	0	0	1.58221651	0	-87.1	30.47536351	8.122325063	1.524675012	29.30407476	1.17374605	0.11432065	0	4195.092881	0.08671425	5.811390042	7.395962656	26.16742468	-2.31093502	5.871287644	-3.136650085	0.531129993	0.033671675	0	0.004160267
795	Flood Spring	Spring	Flood	333	2645.49217	0	0	0	0	2.64549217	0	-87.06	30.47538838	7.649170041	2.84455502	27.02682543	1.1250368	0.14385791	0	5487.415079	0.1029453	9.49383235	8.753107429	25.50722456	1.844662309	5.908552408	-1.519600868	0.523873992	0.033595625	0	0.001269194
796	Flood Spring	Spring	Flood	334	2907.2546	0	0	0	0	2.9072546	0	-87.05	30.47539252	7.691037416	2.786087513	27.18857479	2.300047	0.03323491	576.9096381	6177.866737	0.0141691	9.872535229	10.36145496	24.15042496	2.181497812	7.575367451	-3.038149834	0.455475003	0.02873835	0	0.030107436
797	Flood Spring	Spring	Flood	335	0	0	0	0	0	0	0	-87.04	30.47539582	7.71675241	2.729210019	27.37732506	2.030688	0.01134195	1522.459176	6434.089612	0.00570436	9.660227299	10.01111507	24.21655035	1.943474889	7.281905055	-3.160774708	0.455480002	0.0287322	0	0.002386094
798	Flood Spring	Spring	Flood	336	1215.19855	0	0	0	0	1.21519855	0	-87.03	30.4753983	7.721257448	2.672780037	27.59150028	1.9857021	0.00654323	2180.635551	6241.845169	0.00331592	9.044137716	9.064747572	24.39115047	1.322880268	6.391967535	-3.200349808	0.455263242	0.028733475	0	0.00043559
799	Flood Spring	Spring	Flood	337	1450.69498	0	0	0	0	1.45069498	0	-87.02	30.47539994	7.699777484	2.614514947	27.828475	1.9317251	0.00941541	1739.13118	6029.210177	0.00425241	8.348370075	7.984740019	24.59994984	0.648592591	5.370225072	-3.228525162	0.4551135	0.028735725	0	0.000831867
800	Flood Spring	Spring	Flood	338	0	0	0	0	0	0	0	-87	30.47540075	7.648557425	2.550890028	28.08897495	1.8619901	0.01393901	1307.526129	5975.278182	0.01206641	7.559627414	6.779072523	24.83807516	-0.088930011	4.228182495	-3.250899792	0.455024749	0.028738225	0	0.001250746
801	Flood Spring	Spring	Flood	339	2035.43833	0	0	0	0	2.03543833	0	-86.99	30.47540072	7.576367378	2.48208499	28.35222483	1.99040989	0.03636197	763.5028467	5978.397027	0.021807	6.707372427	5.541910052	25.08102512	-0.868994951	3.059825063	-3.271199703	0.454980247	0.02874055	0	0.003768287
802	Flood Spring	Spring	Flood	340	1498.78131	0	0	0	0	1.49878131	0	-86.98	30.47539987	7.570660114	2.416927516	28.52152491	1.91821449	0.09950869	125.3455296	6090.792426	0.08988224	5.912800074	4.4633075	25.28737497	-1.657860041	2.046379983	-3.234149933	0.454962753	0.028742425	0	0.005587795
803	Flood Spring	Spring	Flood	341	696.88698	0	0	0	0	0.69688698	0	-86.97	30.47539818	7.264837503	1.902153768	28.46399975	0.72891987	0.08135502	0	6348.207356	0.07134361	4.865002573	2.834140003	24.80609989	-2.399834931	0.931986235	-3.657899857	0.521269508	0.033668125	0	0.003741764
804	Flood Spring	Spring	Flood	342	0	0	0	0	0	0	0	-87.16	30.48432514	4.749019861	0.929673225	26.48635006	0.66969082	0.07110967	0	5693.681269	0.08274498	3.547099948	2.077815056	23.28084993	-1.201919913	1.148141831	-3.205500126	0.526365995	0.0357378	0	0.007575786
805	Flood Spring	Spring	Flood	343	1138.18365	0	0	0	0	1.13818365	0	-87.15	30.48433761	8.071219683	1.463422507	25.84245014	1.77702682	0.08540796	0	5381.620569	0.07610044	3.380489945	5.980642557	24.35974979	-4.690729737	4.51722005	-1.482700348	0.465349741	0.029290176	0	0.046548664
806	Flood Spring	Spring	Flood	344	115.99834	0	0	0	0	0.11599834	0	-87.14	30.48434924	8.079384804	1.258994967	26.07937527	1.9866278	0.02930012	536.8648444	4665.4455	0.0120987	1.07282299	4.087779939	24.86939955	-7.006561814	2.828784972	-1.209975719	0.465382755	0.029176225	0	0.025450936
807	Flood Spring	Spring	Flood	345	1815.58209	0	0	0	0	1.81558209	0	-87.13	30.48436004	8.098472357	1.165262491	26.31687498	2.1947269	0.02976646	1504.139006	4013.832958	0.00747865	-0.339216992	5.064287484	24.96262503	-8.437689349	3.899024993	-1.354249954	0.465425253	0.02911875	0	0.003893696
808	Flood Spring	Spring	Flood	346	2246.86318	0	0	0	0	2.24686318	0	-87.12	30.48437001	8.103080034	1.106019974	26.54984999	1.9550527	0.02534788	1446.246178	3504.995156	0.0135123	-0.015348747	4.653429985	25.22290039	-8.118428782	3.547410011	-1.326949596	0.465433501	0.02896545	0	0.002531312
809	Flood Spring	Spring	Flood	347	2128.89081	0	0	0	0	2.12889081	0	-87.11	30.48437914	8.074057579	1.056251749	26.75290012	1.8021653	0.01726238	446.3365939	3225.378478	0.02948311	1.951702058	4.842670023	25.33884954	-6.122355521	3.786418274	-1.414050579	0.465426005	0.02883045	0	0.008650495
810	Flood Spring	Spring	Flood	348	715.37486	0	0	0	0	0.71537486	0	-87.1	30.48438744	8.100057602	1.364941493	29.49247503	0.87588178	0.09418517	0	3195.092881	0.06713877	5.188472509	3.546557486	27.66162491	-2.911585093	2.181615993	-1.830850124	0.596793987	0.03845915	0	6.88E-05
811	Flood Spring	Spring	Flood	349	160.39753	0	0	0	0	0.16039753	0	-87.06	30.48441232	7.816482544	2.140839994	29.47897482	0.49869302	0.09555025	0	4764.91055	0.10343394	7.568014979	3.94896993	28.23592472	-0.248467565	1.808129936	-1.243050098	0.65977376	0.043314476	0	5.70E-06
812	Flood Spring	Spring	Flood	350	3026.89446	0	0	0	0	3.02689446	0	-87.05	30.48441646	7.754612446	2.687447488	27.4053998	1.96123489	0.03968037	260.3021604	5445.186336	0.03521869	9.290384769	9.539132357	24.28707504	1.535772324	6.851684868	-3.118324757	0.454985246	0.028750975	0	0.026386604
813	Flood Spring	Spring	Flood	351	935.88068	0	0	0	0	0.93588068	0	-87.04	30.48441977	7.767597437	2.646734953	27.54067516	2.08527371	0.00998551	1183.579056	5434.089612	0.00472079	9.141567993	9.30233593	24.33125992	1.373970556	6.655600977	-3.209415245	0.454977596	0.02874818	0	0.004563112
814	Flood Spring	Spring	Flood	352	2052.41688	0	0	0	0	2.05241688	0	-87.03	30.48442224	7.761647463	2.6082775	27.69400024	1.9494632	0.01589338	1263.748191	5292.454511	0.00585715	8.746565104	8.689882517	24.44764996	0.984917641	6.081605017	-3.246350288	0.454901502	0.0287472	0	0.002420695
815	Flood Spring	Spring	Flood	353	1216.54038	0	0	0	0	1.21654038	0	-87.02	30.48442389	7.730702519	2.569525003	27.86984968	1.8313973	0.0088117	860.7055034	5039.922519	0.00593512	8.223315239	7.880044937	24.60657501	0.49261272	5.310519934	-3.26327467	0.454847001	0.028747125	0	0.003418141
816	Flood Spring	Spring	Flood	354	1735.15534	0	0	0	0	1.73515534	0	-87	30.4844247	7.66981256	2.526040018	28.07937527	1.98670752	0.07366084	393.3138288	4975.278182	0.07037526	7.592027545	6.913227439	24.80022526	-0.077785015	4.387187421	-3.279150009	0.454855256	0.028745925	0	0.005443901
817	Flood Spring	Spring	Flood	355	2623.18061	0	0	0	0	2.62318061	0	-86.99	30.48442467	7.594654918	2.478800058	28.29819965	1.37335983	0.13908164	0	4978.975636	0.10568873	6.88556993	5.871850014	25.00787497	-0.709084988	3.393049955	-3.290324688	0.454885498	0.028744775	0	0.002098893
818	Flood Spring	Spring	Flood	356	160.61932	0	0	0	0	0.16061932	0	-86.98	30.48442382	6.351462483	0.982197255	28.36189985	0.43111494	0.05373053	0	5112.519864	0.08479622	5.471934974	3.735205054	24.62987518	-0.879527509	2.753007799	-3.73202467	0.521239512	0.033668125	0	0.006520502
819	Flood Spring	Spring	Flood	357	1358.7547	0	0	0	0	1.3587547	0	-87.15	30.49336151	6.972412288	0.667554751	26.45350027	1.48539889	0.1270432	0	4777.119414	0.07702799	3.848954976	1.868470013	25.00590038	-3.123457313	1.200915262	-1.447599888	0.465304993	0.029086325	0	0.010530482
820	Flood Spring	Spring	Flood	358	979.56918	0	0	0	0	0.97956918	0	-87.14	30.49337315	8.047492504	0.756949514	26.44724989	1.8188621	0.01977066	487.0605843	3971.084445	0.01408811	2.650841787	1.101745993	25.27312517	-5.396650717	0.344796479	-1.174124718	0.46533975	0.02903915	0	0.008438846
821	Flood Spring	Spring	Flood	359	0	0	0	0	0	0	0	-87.13	30.49338395	8.092172384	0.771641493	26.70907545	1.9020724	0.01014581	1487.060584	3253.906438	0.00452805	-2.160570025	1.174826242	25.61947489	-10.25274241	0.403184749	-1.089600563	0.465400994	0.028994075	0	0.004160271
822	Flood Spring	Spring	Flood	360	0	0	0	0	0	0	0	-87.12	30.49339392	8.111739874	0.794070736	26.97832489	1.8212206	0.00448836	1446.205827	2622.602644	0.00396113	-1.032074265	1.129489258	25.69447517	-9.143814139	0.335418522	-1.283849716	0.465432249	0.028876575	0	0.001988578
823	Flood Spring	Spring	Flood	361	1009.03067	0	0	0	0	1.00903067	0	-87.11	30.49340306	8.056814909	0.80473125	27.19509983	1.78039209	0.03457952	446.2058265	2238.946306	0.04509078	1.996508211	1.627997249	25.72617483	-6.060306698	0.823266	-1.468924999	0.465448499	0.028771975	0	0.002022322
824	Flood Spring	Spring	Flood	362	0	0	0	0	0	0	0	-87.1	30.49341137	8.017627716	1.224153757	29.60882521	0.54635152	0.08772792	0	2195.092881	0.06741689	5.263237417	1.96292752	27.75094986	-2.754390299	0.738773763	-1.857875347	0.596693248	0.038438775	0	3.84E-06
825	Flood Spring	Spring	Flood	363	1431.86332	0	0	0	0	1.43186332	0	-87.05	30.4934404	7.770655036	2.628157556	27.57404947	1.39697225	0.10369178	0	4447.681981	0.05167258	8.247042537	7.09156993	25.52285051	0.476387501	4.463412374	-2.051198959	0.522785254	0.03361665	0	0.002581085
826	Flood Spring	Spring	Flood	364	2489.38093	0	0	0	0	2.48938093	0	-87.04	30.4934437	7.773397446	2.602862477	27.66262531	2.2822092	0.02597041	666.7494724	4434.089612	0.01121068	8.68797493	8.672084808	24.43932486	0.914577484	6.069222331	-3.223300457	0.454546005	0.028763975	0	0.013651295
827	Flood Spring	Spring	Flood	365	1547.69077	0	0	0	0	1.54769077	0	-87.03	30.49344618	7.765817642	2.580135047	27.7581501	1.9226765	0.0393173	561.97932	4365.720832	0.02482989	8.499190092	8.371587515	24.49857473	0.73337245	5.791452467	-3.259575367	0.4545765	0.028760725	0	0.006578088
828	Flood Spring	Spring	Flood	366	1210.1275	0	0	0	0	1.2101275	0	-87.02	30.49344782	7.743292451	2.557607532	27.86777449	1.34022647	0.06574277	0	4055.892335	0.03484399	8.153424978	7.830022454	24.60722494	0.410132527	5.272414923	-3.260549545	0.454611994	0.028757675	0	0.004526145
829	Flood Spring	Spring	Flood	367	0	0	0	0	0	0	0	-87	30.49344863	6.817929983	1.509400502	28.18812513	0.75212673	0.06252789	0	3975.278182	0.04336097	6.566304982	5.355879903	24.30430031	-0.251625001	3.846479401	-3.883824825	0.521098509	0.03367385	0	0.00888135
830	Flood Spring	Spring	Flood	368	1060.34066	0	0	0	0	1.06034066	0	-87.15	30.50238541	8.167614937	0.337461002	26.54882479	2.16068709	0.08110946	278.3909119	3971.621345	0.06836243	4.106795073	0.743150756	25.14977503	-4.060819864	0.405689754	-1.399049759	0.465245254	0.028999625	0	0.019121202
831	Flood Spring	Spring	Flood	369	1324.90453	0	0	0	0	1.32490453	0	-87.14	30.50239705	8.041830063	0.384317495	26.67382479	2.1628601	0.03162134	886.6384851	3403.570473	0.00913332	5.551779985	0.3129295	25.26097488	-2.490050077	-0.071387995	-1.412849903	0.465285003	0.028963375	0	0.003427128
832	Flood Spring	Spring	Flood	370	2069.92839	0	0	0	0	2.06992839	0	-87.13	30.50240785	8.133119822	0.480012752	26.98762512	1.8764105	0.00992257	1661.399703	2564.601996	0.00558066	2.51719106	0.0209118	25.52402544	-5.615928762	-0.459100952	-1.463599682	0.465360753	0.02892255	0	0.000311204
833	Flood Spring	Spring	Flood	371	2049.97146	0	0	0	0	2.04997146	0	-87.12	30.50241783	8.144622803	0.56511651	27.31985044	1.80355499	0.0009836	1455.205762	1841.943738	0.00099906	3.343255013	0.06807825	25.53264999	-4.80136779	-0.49703826	-1.787200451	0.465406753	0.028836425	0	0.000256113
834	Flood Spring	Spring	Flood	372	2454.2024	0	0	0	0	2.4542024	0	-87.11	30.50242697	8.00316	0.62296775	27.56737518	1.8163346	0.01437058	455.4059493	1273.850383	0.02617169	5.102792561	0.42025549	25.78832531	-2.900367439	-0.20271226	-1.779049873	0.465437248	0.028761275	0	0.000393177
835	Flood Spring	Spring	Flood	373	473.96873	0	0	0	0	0.47396873	0	-87.1	30.50243528	7.878574967	1.096806765	29.62972498	0.80083265	0.11913275	0	1195.092881	0.08610366	6.160605073	0.938391745	26.97157478	-1.717969894	-0.15841502	-2.658150196	0.531015493	0.0335843	0	1.60E-06
836	Flood Spring	Spring	Flood	374	869.77965	0	0	0	0	0.86977965	0	-87.05	30.50246432	7.64469254	2.261052549	28.43610048	0.72702964	0.11853402	0	3451.622195	0.09009306	7.308804989	4.897030056	26.48002529	-0.335887551	2.635977507	-1.956075191	0.590575986	0.038478475	0	0.000157309
837	Flood Spring	Spring	Flood	375	1178.65655	0	0	0	0	1.17865655	0	-87.04	30.50246763	7.741822481	2.590117455	27.74980021	2.3872287	0.03450679	514.7820268	3434.089612	0.03188351	8.342717171	8.189049959	24.5260005	0.60089469	5.598932505	-3.223799706	0.45419275	0.028778475	0	0.012381007
838	Flood Spring	Spring	Flood	376	2144.29148	0	0	0	0	2.14429148	0	-87.03	30.5024701	7.727377534	2.58315742	27.80002499	1.50069382	0.10584129	0	3479.793387	0.07199086	8.255432606	8.047404766	24.5543251	0.528055072	5.464247346	-3.245699883	0.454232752	0.028775699	0	0.004175204
839	Flood Spring	Spring	Flood	377	0	0	0	0	0	0	0	-87.16	30.51139681	7.265412569	0.313058499	26.719625	0.74548452	0.10889756	0	2736.652544	0.07946597	2.958414972	0.156463504	23.60984993	-4.306997597	-0.156594995	-3.109775066	0.526356988	0.03517865	0	0.03533148
840	Flood Spring	Spring	Flood	378	3389.00396	0	0	0	0	3.38900396	0	-87.15	30.51140929	8.320230007	0.201913502	26.73874998	2.35370829	0.04057861	419.8144241	3056.482682	0.03030566	1.120285228	0.472510256	25.37225008	-7.199944779	0.270596754	-1.366499901	0.465182252	0.028942525	0	0.039605085
841	Flood Spring	Spring	Flood	379	2499.96769	0	0	0	0	2.49996769	0	-87.14	30.51142093	8.241377592	0.212480001	26.82884932	2.2516323	0.02628025	1381.759797	3043.932911	0.00523258	-0.434082478	0.2919905	25.43082523	-8.67546007	0.079510499	-1.398024082	0.465225749	0.028919875	0	0.006273312
842	Flood Spring	Spring	Flood	380	137.44814	0	0	0	0	0.13744814	0	-87.13	30.51143174	8.329257488	0.330634996	27.16895008	1.8500602	0.01272778	1411.365663	2079.331635	0.01117228	4.838757515	0.034523347	25.48037481	-3.490499973	-0.296111649	-1.688575268	0.465310499	0.02888745	0	0.00019266
843	Flood Spring	Spring	Flood	381	34.05019	0	0	0	0	0.03405019	0	-87.12	30.51144172	8.131067514	0.434810497	27.60582495	1.79802229	0.00289349	965.4564066	1171.734784	0.00508157	7.172110081	0.161224025	25.57310009	-0.958957434	-0.273586472	-2.032724857	0.465365499	0.028826175	0	0.000127826
844	Flood Spring	Spring	Flood	382	1292.83282	0	0	0	0	1.29283282	0	-87.11	30.51145086	7.800162435	0.512196995	27.91410017	1.7742994	0.02285062	426.1323341	428.4606405	0.02802446	7.667447567	0.342468746	26.12882519	-0.132714868	-0.169728249	-1.785274982	0.465406507	0.028773725	0	3.70E-05
845	Flood Spring	Spring	Flood	383	0	0	0	0	0	0	0	-87.1	30.51145917	7.58908987	0.930560753	29.4145503	0.99591326	0.11155408	0	195.0928814	0.08252997	7.188035131	0.451216504	26.56589985	-0.40105474	-0.479344249	-2.848650455	0.465425253	0.028744425	0	1.28E-06
846	Flood Spring	Spring	Flood	384	315.48354	0	0	0	0	0.31548354	0	-87.05	30.51148823	7.375602484	1.845167518	28.99787474	0.7405058	0.09085028	0	2458.763217	0.05889923	6.368592501	2.924254954	26.89002466	-1.007009983	1.079087436	-2.107850075	0.658155993	0.04333355	0	0.000210676
847	Flood Spring	Spring	Flood	385	2870.89558	0	0	0	0	2.87089558	0	-87.04	30.51149154	7.686462522	2.598167479	27.81174946	2.14959588	0.04683969	298.9952598	2434.089612	0.0355434	8.023500085	7.737315059	24.6097002	0.337037563	5.13914758	-3.202049255	0.45385576	0.0287925	0	0.006867969
848	Flood Spring	Spring	Flood	386	2081.36663	0	0	0	0	2.08136663	0	-87.03	30.51149401	7.662815094	2.602142453	27.83914948	1.99504292	0.05902425	240.7860519	2520.041361	0.05772964	7.956002474	7.636275053	24.62912464	0.29318738	5.0341326	-3.210024834	0.453823	0.0287935	0	0.00409989
849	Flood Spring	Spring	Flood	387	0	0	0	0	0	0	0	-87.02	30.51149566	7.637687445	2.609332442	27.8576498	1.08932068	0.05059304	0	2132.873627	0.0319268	7.807267547	7.422982454	24.66987514	0.169580102	4.813650012	-3.187774658	0.453667998	0.028799925	0	0.00114716
850	Flood Spring	Spring	Flood	388	371.82531	0	0	0	0	0.37182531	0	-87.17	30.52040736	5.34068495	0.451270759	26.6260004	1.31771087	0.08239937	0	1610.665794	0.0291903	3.715747416	0.21776025	24.36632538	-1.624937534	-0.233510509	-2.259675026	0.506323256	0.032997576	0	0.024897871
851	Flood Spring	Spring	Flood	389	1195.78058	0	0	0	0	1.19578058	0	-87.16	30.52042067	7.446879983	0.306950249	26.96472502	1.66264386	0.10713677	0	1759.66268	0.07620632	2.73546496	0.433700509	25.71799994	-4.711415023	0.126750261	-1.246725082	0.465080753	0.028890175	0	0.002917559
852	Flood Spring	Spring	Flood	390	172.59798	0	0	0	0	0.17259798	0	-87.15	30.52043316	7.783627629	0.240337495	26.97847509	2.0767407	0.02997272	438.2667795	2209.487723	0.01300076	0.710219476	0.35741175	25.84097528	-7.073408153	0.117074255	-1.137499809	0.465129495	0.028901025	0	0.015417045
853	Flood Spring	Spring	Flood	391	1343.12416	0	0	0	0	1.34312416	0	-87.14	30.5204448	8.463354826	0.245213002	27.0073247	2.1373935	0.02038935	800.2845464	2935.097305	0.01018509	2.682999488	0.215388248	26.311975	-5.780355338	-0.029824754	-0.695349693	0.465179987	0.028888951	0	0.001004515
854	Flood Spring	Spring	Flood	392	6616.68156	0	0	0	0	6.61668156	0	-87.13	30.52045562	8.642585039	0.318584509	27.249475	1.8171825	0.02233311	463.0496967	1970.953759	0.01970622	4.808289981	0.138384998	26.2701004	-3.834295058	-0.180199511	-0.979374599	0.465261799	0.0288663	0	0.000119776
855	Flood Spring	Spring	Flood	393	2768.10129	0	0	0	0	2.76810129	0	-87.12	30.5204656	8.098077774	0.393638253	27.76135015	1.57783915	0.06408562	96.81614628	970.9537592	0.04794003	7.603752494	0.2546345	26.64884996	-0.49432528	-0.139003754	-1.112500191	0.465332992	0.028821125	0	4.49E-06
856	Flood Spring	Spring	Flood	394	0	0	0	0	0	0	0	-87.11	30.52047475	7.301954985	0.551738001	28.45865011	1.12285441	0.09188703	0	0	0.06960372	6.951002479	0.49961599	27.01152515	-0.350952506	-0.052122012	-1.447124958	0.530172989	0.033637575	0	3.33E-06
857	Flood Spring	Spring	Flood	395	0	0	0	0	0	0	0	-87.1	30.52048306	7.16426754	1.155763492	30.40279961	0.32061127	0.03265008	0	0	0.03727819	5.980147481	0.925622746	27.11955023	-1.184120059	-0.230140746	-3.283249378	0.660433501	0.0433281	0	6.20E-06
858	Flood Spring	Spring	Flood	396	0	0	0	0	0	0	0	-87.05	30.52051212	6.831827402	1.264927223	28.98635006	0.35775079	0.03884092	0	1475.580337	0.03208916	5.909945011	2.58231695	26.25554991	-0.921882391	1.317389727	-2.730800152	0.65739774	0.043341475	0	0.000578709
859	Flood Spring	Spring	Flood	397	3392.67994	0	0	0	0	3.39267994	0	-87.04	30.52051543	7.626572371	2.613929987	27.85892487	1.66588656	0.0985498	0	1434.089612	0.06732925	7.768155098	7.373402476	24.67869997	0.141582727	4.759472489	-3.180224895	0.453576751	0.028804075	0	0.001792689
860	Flood Spring	Spring	Flood	398	1756.32111	0	0	0	0	1.75632111	0	-87.03	30.52051791	7.605112553	2.620352507	27.87439966	1.8654331	0.02061508	754.8886372	1575.57267	0.01500509	7.674447417	7.238305092	24.70480013	0.069334865	4.617952585	-3.169599533	0.453478254	0.02880805	0	0.001048063
861	Flood Spring	Spring	Flood	399	422.62289	0	0	0	0	0.42262289	0	-87.02	30.52051956	7.577587485	2.631367505	27.88494921	1.17207942	0.06316427	0	1264.354992	0.04138695	7.585352421	7.111610055	24.72965002	0.007764935	4.48024255	-3.155299187	0.453359745	0.028813	0	0.00070271
862	Flood Spring	Spring	Flood	400	1218.66499	0	0	0	0	1.21866499	0	-87.18	30.52941705	1.058731779	0.326042995	26.01104975	0.97225022	0.02146013	0	611.4659362	0.01725917	1.559957534	0.34831775	25.38192463	0.501225755	0.022274755	-0.629125118	0.465014748	0.02884565	0	0.027527343
863	Flood Spring	Spring	Flood	401	5041.8629	0	0	0	0	5.0418629	0	-87.17	30.5294312	1.998866729	0.34707249	26.46965027	1.7135203	0.05331581	296.0170142	610.6657937	0.01768669	1.628006019	0.355293006	25.46314955	-0.370860711	0.008220516	-1.006500721	0.4650295	0.028859125	0	0.021510766
864	Flood Spring	Spring	Flood	402	4122.18234	0	0	0	0	4.12218234	0	-87.16	30.52944452	2.614257775	0.327905498	27.06542444	2.24654389	0.01985505	689.1253992	820.5732604	0.01115619	0.642734662	0.3331545	25.62429953	-1.971523114	0.005249001	-1.441124916	0.46505674	0.0288736	0	0.017734106
865	Flood Spring	Spring	Flood	403	3162.51173	0	0	0	0	3.16251173	0	-87.15	30.52945701	5.279299974	0.285795249	27.09140015	2.2770806	0.01189641	1161.853217	1548.92696	0.00687571	1.645761013	0.285861999	26.07614946	-3.633538961	6.67E-05	-1.015250683	0.465092249	0.02887815	0	0.004823871
866	Flood Spring	Spring	Flood	404	3762.05972	0	0	0	0	3.76205972	0	-87.14	30.52946866	7.763884902	0.305642501	27.16062498	1.88528493	0.05841097	234.5269366	2470.467511	0.03938483	5.935039997	0.218712747	26.71560049	-1.828844905	-0.086929753	-0.44502449	0.465135001	0.0288721	0	6.42E-05
867	Flood Spring	Spring	Flood	405	7148.09279	0	0	0	0	7.14809279	0	-87.13	30.52947948	7.654899955	0.592735745	28.37659979	1.01568629	0.07181885	0	1986.888506	0.05936655	7.785355091	0.308489999	26.81677485	0.130455136	-0.284245746	-1.559824944	0.530070744	0.033687875	0	2.31E-06
868	Flood Spring	Spring	Flood	406	0	0	0	0	0	0	0	-87.12	30.52948947	7.050775051	0.722661488	28.97167492	0.7066454	0.038268	0	997.5273958	0.03655576	6.683560014	0.541919988	26.79615021	-0.367215037	-0.1807415	-2.175524712	0.594949506	0.038501025	0	1.38E-05
869	Flood Spring	Spring	Flood	407	1217.71093	0	0	0	0	1.21771093	0	-87.04	30.52953932	7.194029927	2.108802706	28.04849958	1.03069872	0.09888386	0	434.0896123	0.06877635	7.536059952	7.045225906	24.74202003	0.342030025	4.9364232	-3.306479549	0.4532704	0.02881696	0	0.000493547
870	Flood Spring	Spring	Flood	408	2472.02425	0	0	0	0	2.47202425	0	-87.03	30.5295418	7.547890067	2.641704977	27.89997482	1.7870096	0.01941158	550.3956018	780.5780402	0.01845433	7.495282531	6.986747503	24.75352526	-0.052607536	4.345042527	-3.146449566	0.453220502	0.028819025	0	0.000813431
871	Flood Spring	Spring	Flood	409	2365.07551	0	0	0	0	2.36507551	0	-87.02	30.52954344	7.520092487	2.654984951	27.90362453	1.66193046	0.04578405	57.24270815	728.8680426	0.04764775	7.434294939	6.900692344	24.77077532	-0.085797548	4.245707393	-3.132849216	0.453124501	0.028823	0	0.000988487
872	Flood Spring	Spring	Flood	410	0	0	0	0	0	0	0	-87	30.52954425	7.494004965	2.668174982	27.90445042	0.86080215	0.03181314	0	0	0.01834975	7.383774996	6.830360174	24.78499985	-0.110229969	4.162185192	-3.119450569	0.453033507	0.02882685	0	0.000215792
873	Flood Spring	Spring	Flood	411	0	0	0	0	0	0	0	-87.19	30.53842588	2.814794227	0.304799996	26.11850023	0.80636346	0.00933433	0	625.5706309	0.00283078	2.578691244	0.082673997	23.55497456	-0.236102983	-0.222126	-2.563525677	0.5319295	0.034881999	0	0.003985116
874	Flood Spring	Spring	Flood	412	0	0	0	0	0	0	0	-87.18	30.53844088	-1.034013748	0.293123007	25.69792509	0.89302474	0.01850201	0	0	0.00848882	0.284146495	0.309927493	25.26352549	1.318160243	0.016804487	-0.434399605	0.465008996	0.028838975	0	0.054990029
875	Flood Spring	Spring	Flood	413	16.99481	0	0	0	0	0.01699481	0	-87.17	30.53845504	0.185292676	0.195456623	24.30610037	1.12059672	0.05906925	0	0	0.03620871	-1.516287491	0.226939496	25.13819981	-1.701580167	0.031482873	0.832099438	0.465014502	0.028847925	0	0.047977559
876	Flood Spring	Spring	Flood	414	3346.05928	0	0	0	0	3.34605928	0	-87.16	30.53846836	-1.560298767	0.25183275	26.26897526	1.95565417	0.05524696	307.7128062	352.0174972	0.04407316	-1.726741463	0.225790005	25.36122465	-0.166442696	-0.026042745	-0.907750607	0.465031751	0.028857726	0	0.01000033
877	Flood Spring	Spring	Flood	415	0	0	0	0	0	0	0	-87.15	30.53848085	3.518357635	0.258426245	26.62179995	2.27645681	0.01918903	1091.204234	1347.995689	0.01489976	1.614222467	0.263878249	26.02649975	-1.904135168	0.005452003	-0.595300198	0.465055995	0.028862575	0	0.00851413
878	Flood Spring	Spring	Flood	416	3902.26868	0	0	0	0	3.90226868	0	-87.14	30.53849251	7.07917738	0.342106253	27.1949501	1.62486274	0.06892034	301.4197185	2347.182389	0.03092905	5.241794944	0.313120998	26.58252525	-1.837382436	-0.028985254	-0.61242485	0.465083249	0.028862525	0	0.000150194
879	Flood Spring	Spring	Flood	417	1863.13983	0	0	0	0	1.86313983	0	-87.13	30.53850333	6.613382578	0.850758001	29.46880007	0.7287803	0.02594685	0	2312.299204	0.01063663	4.979257464	0.797319263	26.2432251	-1.634125113	-0.053438738	-3.22557497	0.724603757	0.048182501	0	0.001822128
880	Flood Spring	Spring	Flood	418	6042.40143	0	0	0	0	6.04240143	0	-87.12	30.53851332	6.588760018	0.836987764	29.42702532	0.47948873	0.0109714	0	1541.521861	0.00340448	4.940592527	0.774532989	26.17514944	-1.648167491	-0.062454775	-3.251875877	0.724456504	0.048183026	0	0.001010573
881	Flood Spring	Spring	Flood	419	0	0	0	0	0	0	0	-87.04	30.53856319	7.058585048	2.062068	27.88207483	0.81153969	0.05038379	0	0	0.04197034	6.607027411	5.227261297	24.81834984	-0.451557636	3.165193297	-3.063724995	0.520602502	0.033670624	0	0.0005471
882	Flood Spring	Spring	Flood	420	2675.89157	0	0	0	0	2.67589157	0	-87.03	30.53856567	7.506844997	2.659929991	27.90925026	1.31478656	0.05874237	101.3750285	144.5451505	0.02191288	7.370292425	6.81171	24.7880249	-0.136552572	4.151780009	-3.121225357	0.453022748	0.02882735	0	0.000508465
883	Flood Spring	Spring	Flood	421	3788.92226	0	0	0	0	3.78892226	0	-87.02	30.53856732	7.475535035	2.677300036	27.90540028	1.7944478	0.0377091	384.7499488	387.0416651	0.03166475	7.334142447	6.761687517	24.79857492	-0.141392589	4.084387481	-3.106825352	0.452944502	0.02883065	0	0.00062321
884	Flood Spring	Spring	Flood	422	2.22841	0	0	0	0	0.00222841	0	-87	30.53856813	7.44598496	2.69481498	27.89790058	1.11585633	0.07068508	0	0	0.05919714	7.305767417	6.723484993	24.80712509	-0.140217543	4.028670013	-3.09077549	0.452864744	0.0288341	0	0.000158019
885	Flood Spring	Spring	Flood	423	0	0	0	0	0	0	0	-87.19	30.5474497	3.87214005	0.279283509	26.18655014	0.64810119	0.00723311	0	622.1056912	0.00347483	3.110930045	0	22.95409966	-0.761210004	-0.279283509	-3.232450485	0.55548201	0.036922533	0	0.007485669
886	Flood Spring	Spring	Flood	424	0	0	0	0	0	0	0	-87.18	30.54746469	3.394769947	0.190639675	24.28163338	0.6390625	0.00980529	0	0	0.00468024	3.113749981	0	22.95910072	-0.281019966	-0.190639675	-1.322532654	0.555010974	0.036912501	0	0.011663063
887	Flood Spring	Spring	Flood	425	0	0	0	0	0	0	0	-87.17	30.54747886	6.694362402	0.004889375	21.14094973	0.83357388	0.03531256	0	0	0.02034543	-1.393087998	0.155770753	25.08170033	-8.0874504	0.150881378	3.940750599	0.465006009	0.0288426	0	0.257306954
888	Flood Spring	Spring	Flood	426	3711.38402	5	2	2	1	3.71138402	0.269441264	-87.16	30.54749219	6.176087499	0.020880099	22.79072475	1.8748807	0.0622424	290.6640473	346.0863948	0.02767754	-0.076961998	0.175176252	25.39439964	-6.253049497	0.154296152	2.603674889	0.465014748	0.028846025	1	0.01934959
889	Flood Spring	Spring	Flood	427	1629.4274	0	0	0	0	1.6294274	0	-87.15	30.54750468	6.273827434	0.153863775	25.43075037	2.2067698	0.0590764	240.5389449	1346.086395	0.0696055	3.549065053	0.24279825	26.10542488	-2.72476238	0.088934476	0.674674511	0.46503076	0.0288507	0	0.003515858
890	Flood Spring	Spring	Flood	428	2107.80786	0	0	0	0	2.10780786	0	-87.14	30.54751635	7.62240994	0.308401741	27.15612507	1.01865336	0.05680505	0	1441.88681	0.0610716	6.818164945	0.332184501	26.74089956	-0.804244995	0.02378276	-0.415225506	0.465053491	0.028855075	0	2.97E-06
891	Flood Spring	Spring	Flood	429	5656.80873	0	0	0	0	5.65680873	0	-87.12	30.54753716	5.815522432	0.490771741	28.21085024	0.43051742	0.01095625	0	2322.362278	0.0053179	4.347265005	0.424852252	25.13062525	-1.468257427	-0.065919489	-3.080224991	0.71879901	0.048170825	0	0.007319497
892	Flood Spring	Spring	Flood	430	0	0	0	0	0	0	0	-87.11	30.54754632	5.817412496	0.479926247	28.19697523	0.35121556	0.00232561	0	2048.968166	0.00100656	4.305752397	0.400385574	25.05755043	-1.511660099	-0.079540674	-3.139424801	0.719709486	0.048176975	0	0.006986836
893	Flood Spring	Spring	Flood	431	4947.74057	0	0	0	0	4.94774057	0	-87.02	30.54759118	6.880542517	2.045780437	27.69425011	1.32556271	0.10761178	0	0	0.07902304	6.448882461	5.070432968	24.70679998	-0.431660056	3.024652531	-2.987450123	0.520278253	0.033681925	0	0.000748551
894	Flood Spring	Spring	Flood	432	2035.35675	0	0	0	0	2.03535675	0	-87	30.54759199	7.400212526	2.725337446	27.87427473	1.27592437	0.07838553	0	0	0.05369065	7.28700006	6.700302482	24.81319952	-0.113212466	3.974965036	-3.061075211	0.452774502	0.028838075	0	0.00021878
895	Flood Spring	Spring	Flood	433	519.48349	0	0	0	0	0.51948349	0	-87.17	30.55650267	8.467897415	0	22.03589964	0.8612799	0.04823881	0	0	0.02773219	1.049812496	0.133711498	25.11324978	-7.418084919	0.133711498	3.07735014	0.464998245	0.0288369	0	0.026825291
896	Flood Spring	Spring	Flood	434	2771.05454	0	0	0	0	2.77105454	0	-87.16	30.556516	8.563719988	0.01020622	23.41355038	1.86191141	0.04453753	377.350942	504.0807529	0.02107017	2.986747503	0.15265375	25.37712526	-5.576972485	0.14244753	1.963574886	0.465002753	0.028837725	0	0.007102022
897	Flood Spring	Spring	Flood	435	3221.97538	0	0	0	0	3.22197538	0	-87.15	30.5565285	8.200574875	0.093880927	25.37882471	1.9333963	0.07301298	153.0574205	476.9418031	0.06211742	5.204154968	0.197581001	25.83782482	-2.996419907	0.103700073	0.459000111	0.465011746	0.028840825	0	0.000497969
898	Flood Spring	Spring	Flood	436	0	0	0	0	0	0	0	-87.14	30.55654017	5.308774948	0.162899498	27.38747501	0.71794555	0.03758109	0	441.8868102	0.02671141	4.479750037	0.156463249	24.69434977	-0.829024911	-0.006436249	-2.693125248	0.648504019	0.043311824	0	0.00534523
899	Flood Spring	Spring	Flood	437	157.57015	0	0	0	0	0.15757015	0	-87.02	30.55661503	5.741529942	0.730888834	27.26110029	0.73935599	0.06657571	0	0	0.05711554	4.708570004	1.774178462	24.39312506	-1.032959938	1.043289628	-2.867975235	0.655031003	0.043378475	0	0.003692912
900	Flood Spring	Spring	Flood	438	6729.63083	0	0	0	0	6.72963083	0	-87	30.55661584	7.358682513	2.755084991	27.84584999	1.58777031	0.1368095	0	0	0.08741335	7.29748261	6.719102383	24.81147528	-0.061199903	3.964017391	-3.034374714	0.452710755	0.028841025	0	0.000202359
901	Flood Spring	Spring	Flood	439	0	0	0	0	0	0	0	-86.99	30.55661582	7.320730209	2.783449888	27.81570053	0.60710245	0.02410395	0	0	0.04360077	7.305104971	6.730844975	24.80970001	-0.015625238	3.947395086	-3.006000519	0.452701986	0.02884145	0	6.79E-05
902	Flood Spring	Spring	Flood	440	0	0	0	0	0	0	0	-87.18	30.56551229	5.483532667	0.069129502	22.21662474	0.61149845	0.02068515	0	0	0.0188871	3.490537524	0.093781	24.49364996	-1.992995143	0.024651498	2.277025223	0.516751006	0.033401125	0	0.024555307
903	Flood Spring	Spring	Flood	441	2406.42889	0	0	0	0	2.40642889	0	-87.17	30.56552646	7.182635069	0.051836875	23.17982483	1.09250521	0.04876805	0	0	0.02552032	3.932150066	0.126347501	25.15404987	-3.250485003	0.074510626	1.974225044	0.464994505	0.028831025	0	0.007302547
904	Flood Spring	Spring	Flood	442	2650.57109	0	0	0	0	2.65057109	0	-87.16	30.5655398	7.88101995	0.076078373	25.41962481	1.7460715	0.03347104	709.0403299	547.424998	0.01679915	5.409220099	0.13220825	25.23184967	-2.47179985	0.056129877	-0.187775135	0.464996256	0.028832375	0	0.000848663
905	Flood Spring	Spring	Flood	443	2853.46456	0	0	0	0	2.85346456	0	-87.15	30.56555231	7.424304962	0.091587748	26.59567451	1.66279036	0.08543337	0	0	0.06348071	6.256520152	0.1526585	25.44162512	-1.16778481	0.061070751	-1.154049397	0.465000749	0.0288344	0	0.000681566
906	Flood Spring	Spring	Flood	444	0	0	0	0	0	0	0	-87.14	30.56556398	5.224147439	0.115613725	27.23130035	0.51223775	0.0396739	0	0	0.02015219	3.654129982	0.0243819	23.91037512	-1.570017457	-0.091231825	-3.320925236	0.70811601	0.0481225	0	0.00409972
907	Flood Spring	Spring	Flood	445	3449.23706	0	0	0	0	3.44923706	0	-87	30.56563968	6.772390008	2.091194928	27.59714985	1.56396074	0.05048988	0	0	0.04953785	6.4157601	5.077427077	24.60207558	-0.356629908	2.986232149	-2.995074272	0.520037003	0.03369085	0	0.001503622
908	Flood Spring	Spring	Flood	446	3722.16184	0	0	0	0	3.72216184	0	-86.99	30.56563965	6.938057661	2.194848977	27.88007498	1.31090868	0.08337757	0	0	0.07558479	7.339777589	6.783657551	24.80132532	0.401719928	4.588808574	-3.078749657	0.452675246	0.0288429	0	0.000305979
909	Flood Spring	Spring	Flood	447	0	0	0	0	0	0	0	-86.98	30.56563879	5.809667468	0.415928751	28.09212494	0.79100133	0.02700006	0	0	0.01571976	4.178842485	1.701132536	23.4277997	-1.630824983	1.285203785	-4.664325237	0.653322265	0.043540949	0	0.002907035
910	Flood Spring	Spring	Flood	448	0	0	0	0	0	0	0	-87.18	30.57453607	5.264675021	0.059982924	23.14890003	0.71496007	0.03616013	0	0	0.04846115	3.636487484	0.093864001	24.47842503	-1.628187537	0.033881078	1.329524994	0.51494576	0.033315925	0	0.009379553
911	Flood Spring	Spring	Flood	449	981.91512	0	0	0	0	0.98191512	0	-87.17	30.57455025	6.30951488	0.084353525	22.88975048	1.09589749	0.06839504	0	0	0.06795148	4.665009856	0.123521002	25.14502478	-1.644505024	0.039167477	2.255274296	0.464993253	0.028828875	0	0.003270546
912	Flood Spring	Spring	Flood	450	1479.19173	0	0	0	0	1.47919173	0	-87.16	30.57456359	6.958235025	0.101765249	24.63777494	1.2521083	0.06120977	0	58.46687648	0.03994198	5.959027529	0.125156997	25.17412472	-0.999207497	0.023391748	0.536349773	0.464994505	0.02883005	0	0.001862111
913	Flood Spring	Spring	Flood	451	159.66106	0	0	0	0	0.15966106	0	-87.15	30.5745761	5.673142433	0.0354236	26.76110029	0.73027898	0.07838503	0	0	0.05359157	4.166969955	0.033190999	23.87039995	-1.506172478	-0.0022326	-2.89070034	0.643807746	0.043251674	0	0.003453777
914	Flood Spring	Spring	Flood	452	0	0	0	0	0	0	0	-87.02	30.57466269	5.649980068	0.706937835	27.12417507	1.5449353	0.03427106	0	0	0.0120877	3.660157502	0.019902467	23.92097521	-1.989822567	-0.687035368	-3.203199863	0.721948996	0.0482398	0	0.02075225
915	Flood Spring	Spring	Flood	453	6151.19642	0	0	0	0	6.15119642	0	-87	30.5746635	6.755882502	2.101680093	27.58039999	1.7529606	0.01731708	0	0	0.01299817	6.451375008	5.136022264	24.58207512	-0.304507494	3.034342172	-2.998324871	0.520004503	0.033692325	0	0.003574007
916	Flood Spring	Spring	Flood	454	4033.24472	0	0	0	0	4.03324472	0	-86.99	30.57466348	7.305820107	2.795157492	27.80192471	1.5009292	0.03462956	0	0	0.00825501	7.3669976	6.824470043	24.79460001	0.061177492	4.029312551	-3.007324696	0.452667251	0.028843475	0	0.000513713
917	Flood Spring	Spring	Flood	455	0	0	0	0	0	0	0	-86.98	30.57466262	6.161192417	0.997189	27.98079967	1.00142491	0.02268427	0	0	0.00985815	5.241779923	3.409232497	23.88335037	-0.919412494	2.412043497	-4.097449303	0.586437009	0.038641775	0	0.002803963
918	Flood Spring	Spring	Flood	456	5759.23862	0	0	0	0	5.75923862	0	-87.02	30.5836865	6.741809964	2.098092496	27.55624962	1.68966614	0.04879693	0	0	0.05240715	4.54547745	1.721784949	24.04552555	-2.196332514	-0.376307547	-3.510724068	0.65443451	0.043396601	0	0.002011129
919	Flood Spring	Spring	Flood	457	1899.20213	0	0	0	0	1.89920213	0	-87	30.58368731	6.079657674	0.952246018	27.84275007	1.28220792	0.052103	0	0	0.03961913	5.262597561	3.440335035	23.8782258	-0.817060113	2.488089018	-3.964524269	0.586432241	0.038642175	0	0.002569951
920	Flood Spring	Spring	Flood	458	0	0	0	0	0	0	0	-87.03	30.59270865	6.722239971	2.097985029	27.52232552	0.97379853	0.02572729	0	0	0.01958458	4.46094501	1.724954963	23.89242554	-2.261294961	-0.373030066	-3.629899979	0.654063255	0.043408774	0	0.000973533
921	Flood Spring	Spring	Flood	459	6449.9408	0	0	0	0	6.4499408	0	-87.02	30.5927103	6.887652397	2.177770488	27.80015039	1.5545249	0.08445995	0	0	0.06476661	7.414397478	6.895374894	24.78287554	0.526745081	4.717604406	-3.017274857	0.452654742	0.028844399	0	0.00052548
922	Flood Spring	Spring	Flood	460	0	0	0	0	0	0	0	-87.03	30.60173243	5.929963271	1.025037368	27.35586739	1.54383388	0.06491644	0	0	0.05766932	4.327789962	1.726034999	23.65655041	-1.602173309	0.700997631	-3.699316978	0.65361549	0.043462625	0	0.002288363
923	Flood Spring	Spring	Flood	461	409.50542	0	0	0	0	0.40950542	0	-87.02	30.60173408	6.026097536	0.921185769	27.75102568	1.7942155	0.01668762	0	0	0.03830843	4.195469975	1.726034999	23.4236002	-1.830627561	0.80484923	-4.32742548	0.653317004	0.043541325	0	0.003411669
924	Flood Spring	Spring	Flood	462	0	0	0	0	0	0	0	-87.03	30.61075621	5.5557549	0.270056747	27.65884972	1.9319633	0.08007925	0	150.0698426	0.06919837	3.120190024	0	22.97042513	-2.435564876	-0.270056747	-4.688424587	0.720197514	0.04844065	0	0.001778949
925	Flood Summer	Summer	Flood	1	3584.4329	0	0	0	0	3.5844329	0	-87.39	30.31238712	5.24944496	23.49317503	29.39925003	3.92725779	0.41145306	0	0	0.20759191	19.6701498	30.97092485	27.04485035	14.42070484	7.477749824	-2.354399681	0.489887245	0.016976125	0	0.137757083
926	Flood Summer	Summer	Flood	2	3097.44207	0	0	0	0	3.09744207	0	-87.38	30.31241769	5.25547755	23.56697512	29.4073	2.06493256	0.21934235	0	628.8088888	0.0879758	19.65497494	30.953825	27.05245018	14.39949739	7.386849877	-2.35484982	0.490012243	0.017002325	0	0.151389891
927	Flood Summer	Summer	Flood	3	2393.29422	0	0	0	0	2.39329422	0	-87.37	30.31244743	5.26475	23.68025017	29.41965008	1.26757028	0.31511094	0	715.6540366	0.19651646	19.62742519	30.92292547	27.06627512	14.36267519	7.242675302	-2.35337496	0.490243755	0.0170502	0	0.099676583
928	Flood Summer	Summer	Flood	4	0	0	0	0	0	0	0	-87.36	30.31247635	5.40826337	19.8161335	29.30486679	1.44294075	0.3886697	0	881.2624882	0.2714456	19.59663328	30.88823318	27.08176676	14.18836991	11.07209968	-2.223100026	0.490533342	0.017107201	0	0.077499591
929	Flood Summer	Summer	Flood	5	0	0	0	0	0	0	0	-87.32	30.31258374	5.85195255	16.02042484	28.19474983	2.71178954	0.23919581	71.30990894	1680.319984	0.0869475	19.72177505	31.02880001	27.01884937	13.8698225	15.00837517	-1.175900457	0.489484496	0.016888025	0	0.04501014
930	Flood Summer	Summer	Flood	6	0	0	0	0	0	0	0	-87.31	30.31260852	5.84174251	15.71212506	27.6033001	6.2676817	0.64785115	387.2164673	2075.198733	0.32307959	19.73567533	31.04442501	27.01182508	13.89393282	15.33229995	-0.591475015	0.489370994	0.016865125	0	0.046976715
931	Flood Summer	Summer	Flood	7	1631.86428	0	0	0	0	1.63186428	0	-87.39	30.32141109	5.09726238	19.78297996	29.27475023	1.87247754	0.34741351	0	0	0.28843276	12.31492031	17.04492235	27.46099997	7.217657926	-2.738057608	-1.813750264	0.473840751	0.0220694	0	0.010334878
932	Flood Summer	Summer	Flood	8	3072.631	0	0	0	0	3.072631	0	-87.38	30.32144167	5.26220512	23.64917565	29.41624975	3.87228347	0.413536	0	0	0.23707631	19.64612532	30.94385004	27.05692482	14.3839202	7.29467439	-2.35932493	0.490085252	0.01701755	0	0.093504737
933	Flood Summer	Summer	Flood	9	4101.83392	0	0	0	0	4.10183392	0	-87.37	30.32147142	5.27543998	23.81092501	29.43394995	4.34450769	0.41251513	0	0	0.24626875	15.94356203	23.95508742	27.27842522	10.66812205	0.144162413	-2.155524733	0.482625246	0.0198873	0	0.056095637
934	Flood Summer	Summer	Flood	10	6237.10482	0	0	0	0	6.23710482	0	-87.36	30.32150035	5.21700752	23.09675026	29.35602474	4.3734973	0.46911507	0	0	0.23698677	19.55632496	30.84297514	27.10200024	14.33931744	7.74622488	-2.254024504	0.490883254	0.01717895	0	0.091475757
935	Flood Summer	Summer	Flood	11	5988.21119	0	0	0	0	5.98821119	0	-87.35	30.32152844	5.017465	20.65787554	29.08994961	3.82331232	0.44160549	0	0	0.22194101	19.51835012	30.80032492	27.12114954	14.50088512	10.14244938	-1.96880007	0.491249248	0.017248675	0	0.105160838
936	Flood Summer	Summer	Flood	12	4650.20336	2	1	0	1	4.65020336	0.215044359	-87.34	30.32155572	4.81896746	18.23185015	28.82527495	3.98100991	0.29456519	0	265.7184429	0.20463254	19.50369978	30.78399992	27.12864971	14.68473232	12.55214977	-1.696625238	0.491304003	0.017255175	1	0.02793896
937	Flood Summer	Summer	Flood	13	1729.76465	0	0	0	0	1.72976465	0	-87.33	30.32158216	5.44134982	20.8718001	29.0253334	1.82582267	0.27976602	0	574.5932767	0.22180753	19.55080032	30.83702517	27.10509968	14.1094505	9.965225066	-1.920233722	0.490726002	0.017136049	0	0.058932242
938	Flood Summer	Summer	Flood	14	0	0	0	0	0	0	0	-87.32	30.32160778	6.0647099	14.02179957	28.06690026	1.26599861	0.25758276	0	738.5438228	0.2600931	19.71475029	31.02094936	27.0223999	13.65004039	16.99914979	-1.044500358	0.489417508	0.0168747	0	0.022156619
939	Flood Summer	Summer	Flood	15	0	0	0	0	0	0	0	-87.31	30.32163257	6.03189754	13.6236999	27.0963006	7.03440086	0.71491614	43.12889905	1330.331227	0.34533571	19.71242571	31.01837492	27.02357483	13.68052817	17.39467502	-0.072725771	0.489125006	0.016818775	0	0.166876907
940	Flood Summer	Summer	Flood	16	0	0	0	0	0	0	0	-87.26	30.32172346	6.07989001	11.23019981	28.84060001	1.72212347	0.41062514	0	1984.310045	0.38183565	21.47329998	32.99295044	26.13164997	15.39340997	21.76275063	-2.708950039	0.474055991	0.01393705	0	0.056837789
941	Flood Summer	Summer	Flood	17	0	0	0	0	0	0	0	-87.25	30.32174411	5.95535342	12.95816644	29.826334	2.9577687	0.52338924	0	2128.130712	0.34760791	21.63207483	33.17232609	26.05397511	15.67672141	20.21415965	-3.772358895	0.471755244	0.0136026	0	0.199011417
942	Flood Summer	Summer	Flood	18	1001.14564	0	0	0	0	1.00114564	0	-87.24	30.32176394	6.11468506	15.95182491	30.25134992	3.07012573	0.46762284	0	2658.394483	0.23622992	21.71597481	33.26792526	26.01467466	15.60128975	17.31610035	-4.236675256	0.469612755	0.0134227	0	0.167589504
943	Flood Summer	Summer	Flood	19	0	0	0	0	0	0	0	-87.23	30.32178294	7.00581503	19.82005024	30.77040005	1.02383447	0.27916021	0	3406.63795	0.19222157	20.70574951	32.13414955	26.52470016	13.69993448	12.31409931	-4.245699885	0.478863999	0.015177	0	0.026490784
944	Flood Summer	Summer	Flood	20	0	0	0	0	0	0	0	-87.22	30.32180112	6.56742334	25.59633382	30.02603277	1.19648216	0.3112783	0	3613.791833	0.19300014	20.72949982	32.16347456	26.51837492	14.16207648	6.56714074	-3.50765785	0.476842001	0.0151178	0	0.011891746
945	Flood Summer	Summer	Flood	21	0	0	0	0	0	0	0	-87.36	30.33052433	4.56202745	7.64780998	29.2184	0.29150274	0.13345232	0	0	0.19835756	4.960379839	3.135814905	27.88344955	0.398352389	-4.511995075	-1.334950446	0.46006725	0.028981776	0	0.006483811
946	Flood Summer	Summer	Flood	22	260.74808	0	0	0	0	0.26074808	0	-87.35	30.33055244	4.64947986	10.54034984	29.23455048	0.6236768	0.18551183	0	0	0.20910207	4.959135056	3.138732493	27.88582468	0.309655196	-7.401617347	-1.3487258	0.460535497	0.02935745	0	0.006278327
947	Flood Summer	Summer	Flood	23	3387.49155	0	0	0	0	3.38749155	0	-87.34	30.33057972	4.78559995	14.04574502	29.25509977	2.36687369	0.2981199	0	0	0.17507544	19.50107479	30.78102493	27.12995005	14.71547484	16.73527991	-2.125149724	0.491430499	0.01727935	0	0.172632368
948	Flood Summer	Summer	Flood	24	6482.3542	3	1	0	1	6.4823542	0.154264943	-87.33	30.33060617	4.90604989	14.21656339	29.6335996	1.89827895	0.25069247	0	0	0.15251146	19.49480009	30.77412462	27.13329983	14.5887502	16.55756123	-2.500299772	0.491300501	0.01724985	1	0.046510388
949	Flood Summer	Summer	Flood	25	6189.7264	0	0	0	0	6.1897264	0	-87.32	30.3306318	6.31878007	13.77702522	29.2286253	2.37869485	0.30383649	0	51.81321367	0.29300402	19.55097485	30.8373003	27.10527515	13.23219478	17.06027508	-2.123350146	0.489660248	0.01692825	0	0.056333732
950	Flood Summer	Summer	Flood	26	3901.49308	0	0	0	0	3.90149308	0	-87.31	30.3306566	6.10912263	12.41967487	30.9751749	6.7635025	0.63854294	0	1051.813214	0.33885969	19.71737528	31.02374983	27.02080011	13.60825265	18.60407496	-3.954374786	0.488309249	0.016670649	0	0.795137205
951	Flood Summer	Summer	Flood	27	3814.41421	3	0	0	1	3.81441421	0.262163453	-87.3	30.33068057	5.64162493	12.96165037	31.24564934	4.47175647	0.5501377	0	1093.998219	0.31635305	20.21690083	31.58325005	26.7666502	14.5752759	18.62159968	-4.47899914	0.484991998	0.01604635	1	0.109544558
952	Flood Summer	Summer	Flood	28	6375.10362	0	0	0	0	6.37510362	0	-87.29	30.33070372	5.79128663	12.72576682	28.90189997	5.85337106	0.5524363	0	1067.223322	0.35933739	20.81720034	32.25590007	26.46153259	15.02591371	19.53013325	-2.440367377	0.480386327	0.015171033	0	0.290408409
953	Flood Summer	Summer	Flood	29	4874.36383	4	1	0	1	4.87436383	0.205154977	-87.28	30.33072603	5.8670299	11.53102494	28.02622461	7.85520679	0.47607941	0	999.5609919	0.38735204	21.18137503	32.66432571	26.27714968	15.31434513	21.13330077	-1.749074933	0.47709275	0.01453595	1	0.118699306
954	Flood Summer	Summer	Flood	30	6072.71481	0	0	0	0	6.07271481	0	-87.26	30.33074752	5.66136015	9.7439549	28.13260031	9.67980638	0.24850554	82.28127713	984.310045	0.25382192	21.45827484	32.97537518	26.13784981	15.79691469	23.23142028	-1.994750502	0.474032246	0.014031675	0	0.696745154
955	Flood Summer	Summer	Flood	31	6320.01014	8	1	0	1	6.32001014	0.158227594	-87.25	30.33076819	4.93645739	10.60398245	29.22302485	10.20645409	0.15756276	519.4370152	1249.127791	0.1712021	21.63310003	33.17245102	26.05144978	16.69664264	22.56846857	-3.171575074	0.471341997	0.01371825	1	0.067611933
956	Flood Summer	Summer	Flood	32	3089.9812	0	0	0	0	3.0899812	0	-87.24	30.33078802	4.96073747	14.16302467	29.93260002	8.55841469	0.32359186	612.2119364	2024.460703	0.21614864	21.72677469	33.27907562	26.00739956	16.76603722	19.11605095	-3.925200461	0.468889497	0.01351145	0	0.20477598
957	Flood Summer	Summer	Flood	33	5730.87756	0	0	0	0	5.73087756	0	-87.23	30.33080703	6.46167004	19.3132	30.65527534	5.2004657	0.34606745	387.4454114	2938.802824	0.13098566	21.77099943	33.33090019	25.99010038	15.30932939	14.01770019	-4.665174956	0.46622175	0.013376075	0	0.120455972
958	Flood Summer	Summer	Flood	34	3637.75707	0	0	0	0	3.63775707	0	-87.22	30.33082521	6.75838745	19.48752451	31.30849981	4.58469292	0.20825852	391.4683944	2863.417288	0.12763769	21.79802561	33.36470032	25.98410034	15.03963816	13.87717581	-5.324399468	0.463187747	0.0132918	0	0.151995028
959	Flood Summer	Summer	Flood	35	2920.48533	0	0	0	0	2.92048533	0	-87.21	30.33084256	6.56250751	17.47205019	31.36257458	4.53349461	0.14836428	387.3421798	2213.586581	0.09229607	21.81602526	33.38930035	25.98405027	15.25351775	15.91725016	-5.378524306	0.460547999	0.0132176	0	0.149942213
960	Flood Summer	Summer	Flood	36	3239.24399	0	0	0	0	3.23924399	0	-87.2	30.33085909	6.93281746	15.90545011	30.75629997	3.11782693	0.25191992	98.57591244	1444.458044	0.1321533	21.82849979	33.40805054	25.98710012	14.89568233	17.50260043	-4.769199846	0.457801499	0.013158125	0	0.044406031
961	Flood Summer	Summer	Flood	37	3038.62542	0	0	0	0	3.03862542	0	-87.19	30.33087478	7.43116987	14.0945251	29.90124941	3.23701194	0.29668696	21.43855945	848.9830331	0.17920591	21.84004974	33.42570019	25.99027538	14.40887987	19.33117509	-3.910974027	0.4545535	0.0130983	0	0.014992922
962	Flood Summer	Summer	Flood	38	3381.03559	0	0	0	0	3.38103559	0	-87.18	30.33088966	7.48799264	11.98149991	29.50785017	3.57463928	0.3321694	0	804.904145	0.1556096	21.86290026	33.45460033	25.98460007	14.37490762	21.47310042	-3.523250103	0.450645998	0.0130022	0	0.014790957
963	Flood Summer	Summer	Flood	39	1834.27956	0	0	0	0	1.83427956	0	-87.17	30.3309037	7.02283335	10.25968329	29.87393316	2.02560596	0.33561205	0	1026.019936	0.17883003	21.88122511	33.47614956	25.97675037	14.85839176	23.21646627	-3.897182786	0.447583251	0.01288995	0	0.008433792
964	Flood Summer	Summer	Flood	40	149.97979	0	0	0	0	0.14997979	0	-87.16	30.33091691	6.61415005	9.47144985	30.19379997	0.7428154	0.2150032	0	1097.212413	0.17724484	21.83106677	33.41870117	25.99943288	15.21691672	23.94725132	-4.194367088	0.448014995	0.013125667	0	0.006319223
965	Flood Summer	Summer	Flood	41	0	0	0	0	0	0	0	-87.15	30.3309293	5.3511399	28.31719995	28.65144968	0.99236248	0.22970282	0	581.1805586	0.3104739	21.83849907	33.42539978	25.99200058	16.48735917	5.10819983	-2.6594491	0.446070999	0.0130941	0	0.004061693
966	Flood Summer	Summer	Flood	42	0	0	0	0	0	0	0	-87.14	30.33094086	5.22363019	33.80189895	28.12244988	2.28427263	0.47515495	0	114.7802189	0.42436563	19.65570068	30.95454979	27.05209923	14.43207049	-2.847349161	-1.070350652	0.490002006	0.017000901	0	0.002868892
967	Flood Summer	Summer	Flood	43	418.21804	0	0	0	0	0.41821804	0	-87.32	30.33965581	4.88670254	8.26962769	29.76687479	0.44852883	0.10753664	0	163.361177	0.11944818	8.631582618	10.09607005	27.68039989	3.744880078	1.826442361	-2.086474895	0.4679965	0.02662285	0	0.029940776
968	Flood Summer	Summer	Flood	44	3208.52998	0	0	0	0	3.20852998	0	-87.31	30.33968062	5.6005125	13.44774985	31.38904953	3.66996508	0.46407997	0	1067.612772	0.25462212	19.87647486	31.20182467	26.93957472	14.27596236	17.75407482	-4.449474812	0.487187251	0.016479075	0	0.420195802
969	Flood Summer	Summer	Flood	45	5784.08404	2	1	0	1	5.78408404	0.172888221	-87.3	30.3397046	5.18851984	14.05290008	30.59870005	6.23085308	0.49154949	0	249.7708161	0.30319196	20.31499958	31.69285011	26.71609974	15.12647974	17.63995003	-3.882600311	0.484390505	0.015979375	1	0.079187683
970	Flood Summer	Summer	Flood	46	4202.87154	2	1	0	1	4.20287154	0.237932564	-87.29	30.33972775	5.59117246	12.40324998	28.37312555	6.53758218	0.378319	27.10168375	67.22332168	0.19720649	20.7885747	32.22312546	26.47477531	15.19740224	19.81987548	-1.898350236	0.480605252	0.0153109	1	0.063748356
971	Flood Summer	Summer	Flood	47	4022.83374	0	0	0	0	4.02283374	0	-87.28	30.33975008	5.58558488	9.80240226	27.05782509	7.07560739	0.39751873	37.63778616	0	0.24766935	21.17334986	32.65412521	26.27892447	15.58776498	22.85172295	-0.778900625	0.476781495	0.01467925	0	0.295190777
972	Flood Summer	Summer	Flood	48	5967.34465	2	0	0	1	5.96734465	0.167578724	-87.27	30.33977158	4.64199007	7.22407746	27.22222471	9.83423942	0.22498336	0	0	0.30259019	21.46144962	32.97709942	26.13307476	16.81945955	25.75302196	-1.08914995	0.473194502	0.0142082	1	0.123834315
973	Flood Summer	Summer	Flood	49	1169.27372	0	0	0	0	1.16927372	0	-87.25	30.33979225	2.86897999	7.07958508	28.48355007	10.49299903	0.032992	472.8413156	765.7855903	0.01367211	21.64497519	33.18354988	26.04134989	18.7759952	26.1039648	-2.442200182	0.4699255	0.01395645	0	0.113479288
974	Flood Summer	Summer	Flood	50	3665.58693	0	0	0	0	3.66558693	0	-87.24	30.33981209	2.69380501	10.39646017	29.47897482	10.02752198	0.07195906	1404.712572	1765.773588	0.02661621	21.73822546	33.28967381	25.99732494	19.04442045	22.89321364	-3.481649876	0.467200749	0.01374305	0	0.008281015
975	Flood Summer	Summer	Flood	51	2337.67955	3	0	0	1	2.33767955	0.427774628	-87.23	30.3398311	5.20445001	17.3035996	30.39255047	8.50506926	0.15244875	1387.445411	2765.770264	0.0885842	21.76882505	33.32554913	25.98559952	16.56437504	16.02194953	-4.406950952	0.46443525	0.01355805	1	0.009084281
976	Flood Summer	Summer	Flood	52	1960.729	0	0	0	0	1.960729	0	-87.22	30.33984929	5.66085505	17.39247513	31.2166996	7.17181471	0.13214259	1390.984308	2111.907013	0.02000713	21.78460026	33.3458004	25.98337507	16.12374521	15.95332527	-5.233324528	0.461172499	0.01345755	0	0.100468167
977	Flood Summer	Summer	Flood	53	4259.07594	30	5	0	1	4.25907594	0.234792714	-87.21	30.33986665	5.64051259	15.80375004	31.36159992	5.52000142	0.08107429	1306.318962	1450.164871	0.04396255	21.79909992	33.36622524	25.98467493	16.15858733	17.5624752	-5.376924989	0.458313003	0.013360175	1	0.030454095
978	Flood Summer	Summer	Flood	54	0	0	0	0	0	0	0	-87.2	30.33988318	6.11747253	14.84870005	30.97027492	5.2969383	0.0645982	1007.868938	807.9671504	0.04138027	21.81037521	33.38352489	25.9879756	15.69290268	18.53482484	-4.982299323	0.455806755	0.013283625	0	0.090150295
979	Flood Summer	Summer	Flood	55	2466.35714	0	0	0	0	2.46635714	0	-87.19	30.33989888	6.6429224	13.29102493	30.43004989	5.46058121	0.15700889	205.523387	39.7791991	0.1151687	21.82377481	33.40299988	25.98947477	15.18085241	20.11197495	-4.440575117	0.453127503	0.0131949	0	0.126212551
980	Flood Summer	Summer	Flood	56	4795.61556	0	0	0	0	4.79561556	0	-87.18	30.33991376	6.8549	10.90033745	30.1484251	4.76397011	0.26461329	0	0	0.20904099	21.86777496	33.45700073	25.97577477	15.01287496	22.55666328	-4.172650335	0.449326992	0.0129591	0	0.081492242
981	Flood Summer	Summer	Flood	57	1553.57377	0	0	0	0	1.55357377	0	-87.17	30.33992781	6.62434006	9.16094994	30.29500008	5.21473979	0.1564265	549.424919	387.5256715	0.09338606	21.89305019	33.48767471	25.96727562	15.26871013	24.32672477	-4.327724461	0.44642175	0.012823475	0	0.104802497
982	Flood Summer	Summer	Flood	58	3366.9318	0	0	0	0	3.3669318	0	-87.16	30.33994103	6.17614007	9.50776267	30.44457483	4.71601966	0.35313313	0	471.9631903	0.24013064	21.70812464	33.27832603	26.05672503	15.53198457	23.77056336	-4.387849805	0.451477997	0.01374365	0	0.142038844
983	Flood Summer	Summer	Flood	59	1552.94188	0	0	0	0	1.55294188	0	-87.15	30.33995342	5.59764493	11.68114996	30.4532504	1.62383563	0.29545376	0	0	0.26447081	21.26669931	32.77804995	26.26954985	15.66905438	21.09689999	-4.183700553	0.465754248	0.0159486	0	0.035667068
984	Flood Summer	Summer	Flood	60	0	0	0	0	0	0	0	-87.14	30.33996499	5.20975495	13.68527508	30.37650013	2.23924912	0.27539509	0	0	0.13698444	19.73519993	31.04454994	27.01345062	14.52544498	17.35927486	-3.363049508	0.518689245	0.023590675	0	0.254232857
985	Flood Summer	Summer	Flood	61	129.88601	0	0	0	0	0.12988601	0	-87.29	30.34875178	4.47406757	6.26490498	29.60272503	0.915894	0.21376822	0	0	0.25419389	4.956797481	3.144219995	27.89032555	0.482729911	-3.120684985	-1.712399484	0.461005747	0.029962126	0	0.003541707
986	Flood Summer	Summer	Flood	62	40.20283	0	0	0	0	0.04020283	0	-87.27	30.34879562	3.62382257	6.04944515	28.81057501	2.99135117	0.55242429	0	0	0.41311728	9.105525017	10.62757748	27.43865013	5.481702447	4.578132334	-1.371924879	0.463409506	0.026052625	0	0.005264178
987	Flood Summer	Summer	Flood	63	3460.38666	0	0	0	0	3.46038666	0	-87.25	30.34881629	1.8923125	6.02428007	28.58232498	9.03747578	0.27575128	31.30988254	765.7643962	0.35175969	21.64557505	33.17862415	26.03079987	19.75326255	27.15434408	-2.551525114	0.467625998	0.014410225	0	0.092844874
988	Flood Summer	Summer	Flood	64	93.08307	0	0	0	0	0.09308307	0	-87.24	30.34883614	1.85864747	8.47017253	29.31100035	9.43771736	0.04868084	1002.663633	1765.764396	0.01729509	21.71509933	33.25690002	25.99626007	19.85645186	24.78672749	-3.314740279	0.463971198	0.01425128	0	0.008381884
989	Flood Summer	Summer	Flood	65	1381.53105	0	0	0	0	1.38153105	0	-87.23	30.34885516	3.52223998	13.17237496	30.04642486	9.24932061	0.02157624	1999.626595	2419.825469	0.01444995	21.74545002	33.29329968	25.98585033	18.22321004	20.12092472	-4.060574526	0.461165503	0.0139374	0	0.005250664
990	Flood Summer	Summer	Flood	66	3473.82	0	0	0	0	3.47382	0	-87.22	30.34887336	4.47875738	14.87895012	30.67254972	8.1738359	0.14566576	1555.08843	1505.597421	0.04486714	21.75235033	33.30240059	25.98547459	17.27359295	18.42345047	-4.687075134	0.456962504	0.013782775	0	0.047043566
991	Flood Summer	Summer	Flood	67	2106.8592	0	0	0	0	2.1068592	0	-87.21	30.34889072	4.88714754	14.63697481	30.94519997	5.7312502	0.10533204	850.8121228	697.9688771	0.04652367	21.76297522	33.31772518	25.98687553	16.87582768	18.68075037	-4.958324436	0.453393258	0.01360435	0	0.142069316
992	Flood Summer	Summer	Flood	68	2280.96637	0	0	0	0	2.28096637	0	-87.2	30.34890726	5.41269255	14.19232535	30.88999987	4.6813433	0.11761383	236.9802893	69.85041436	0.07057321	21.77580023	33.33670044	25.98912525	16.36310768	19.14437509	-4.900874618	0.451359503	0.013463275	0	0.179392873
993	Flood Summer	Summer	Flood	69	1836.2528	0	0	0	0	1.8362528	0	-87.19	30.34892297	5.73639262	10.35915503	29.85197497	2.36035252	0.30324738	0	0	0.14047472	21.79547548	33.36397552	25.98915005	16.05908286	23.00482049	-3.862824923	0.450351745	0.01333515	0	0.059575016
994	Flood Summer	Summer	Flood	70	338.26095	0	0	0	0	0.33826095	0	-87.18	30.34893785	5.39944267	3.39122251	28.16117478	0.93324474	0.20439295	0	0	0.18583596	13.86418509	17.23585498	26.0614996	8.464742425	13.84463247	-2.099675184	0.457975	0.02233055	0	0.042459065
995	Flood Summer	Summer	Flood	71	5507.17152	2	1	0	1	5.50717152	0.181581415	-87.17	30.3489519	5.99905753	6.56443986	29.80079985	2.33428481	0.25140799	0	0	0.18219603	13.87531018	17.25022972	26.05932474	7.876252653	10.68578986	-3.741475109	0.456792504	0.022271075	1	0.04497773
996	Flood Summer	Summer	Flood	72	3368.72639	0	0	0	0	3.36872639	0	-87.16	30.34896513	5.95437253	9.65132761	30.56764984	3.26355504	0.29420794	0	0	0.15070145	21.35765991	32.88074036	26.22498016	15.40328738	23.22941275	-4.342669676	0.462973201	0.0154973	0	0.088024119
997	Flood Summer	Summer	Flood	73	1079.91746	0	0	0	0	1.07991746	0	-87.15	30.34897753	5.50415492	11.8979249	30.48184967	5.2561386	0.28127431	0	0	0.21836836	20.37737465	31.77132463	26.70129967	14.87321973	19.87339973	-3.780550003	0.496329755	0.020386725	0	0.268782627
998	Flood Summer	Summer	Flood	74	2051.55995	0	0	0	0	2.05155995	0	-87.25	30.35784033	2.63076245	7.21094989	29.06192494	6.11085007	0.51872226	0	1237.755381	0.39307189	21.64276009	33.16673889	26.01584015	19.01199764	25.955789	-3.046084791	0.464106995	0.01513454	0	0.206149092
999	Flood Summer	Summer	Flood	75	867.34138	0	0	0	0	0.86734138	0	-87.24	30.35786018	2.5688225	8.70054984	29.36275005	9.36498252	0.05047271	996.5860798	2026.465313	0.02768006	21.67003314	33.19573339	25.99850082	19.10121064	24.49518355	-3.364249226	0.459028333	0.0150371	0	0.011843838
1000	Flood Summer	Summer	Flood	76	3030.42066	0	0	0	0	3.03042066	0	-87.23	30.35787921	3.23392498	11.25407505	29.76302481	9.17844108	0.03685637	1996.58608	2288.841493	0.0195388	21.69484949	33.2265501	25.99160004	18.46092451	21.97247505	-3.771424773	0.455103494	0.014521675	0	0.003918579
1001	Flood Summer	Summer	Flood	77	0	0	0	0	0	0	0	-87.22	30.35789741	3.88227749	12.82694984	30.11117506	8.53889142	0.14225931	1333.664525	1288.841493	0.09778417	21.69169998	33.22235012	25.99117517	17.80942249	20.39540028	-4.119999885	0.447945997	0.014230625	0	0.029570204
1002	Flood Summer	Summer	Flood	78	1319.51756	0	0	0	0	1.31951756	0	-87.21	30.35791478	4.3696549	13.26845002	30.33229971	5.36479233	0.24211879	333.6645247	288.8414933	0.17600498	21.69542007	33.22867966	25.99262009	17.32576517	19.96022964	-4.339679623	0.441889805	0.01382654	0	0.131241337
1003	Flood Summer	Summer	Flood	79	2279.67201	0	0	0	0	2.27967201	0	-87.2	30.35793133	4.90990746	10.49033007	29.74952507	1.91657424	0.26982844	0	0	0.16121752	17.75579298	25.2023024	26.0326252	12.84588552	14.71197233	-3.716899872	0.448419251	0.018115175	0	0.074574803
1004	Flood Summer	Summer	Flood	80	1582.90766	0	0	0	0	1.58290766	0	-87.33	30.36670211	4.45930743	5.35418999	29.65352488	0.86854348	0.02067507	0	3083.799941	0.01994432	4.946245074	3.168977499	27.91059971	0.486937644	-2.185212491	-1.742925171	0.463688754	0.031810251	0	0.044744921
1005	Flood Summer	Summer	Flood	81	4138.26883	0	0	0	0	4.13826883	0	-87.32	30.36672777	4.46848011	5.76960992	29.61902523	1.05186036	0.11588085	0	2946.15342	0.0625525	4.950692415	3.158549964	27.90207481	0.482212305	-2.611059956	-1.716950416	0.462539747	0.031038825	0	0.032751548
1006	Flood Summer	Summer	Flood	82	35.80674	0	0	0	0	0.03580674	0	-87.31	30.3667526	4.48459494	6.42568743	29.55669975	0.81291207	0.07729294	0	2264.937158	0.07142342	4.956729889	3.14437753	27.89044952	0.472134949	-3.2813099	-1.666250226	0.461191252	0.030010325	0	0.024681643
1007	Flood Summer	Summer	Flood	83	661.38685	0	0	0	0	0.66138685	0	-87.3	30.36677661	4.477965	6.32410252	29.58562469	0.9901348	0.10005788	0	1880.16818	0.07914203	4.956749916	3.144332528	27.89042473	0.478784916	-3.179769992	-1.695199962	0.461078502	0.029983876	0	0.034105452
1008	Flood Summer	Summer	Flood	84	1657.7345	0	0	0	0	1.6577345	0	-87.29	30.36679979	5.311445	9.87304259	30.72887516	1.08266122	0.09759672	0	1798.377091	0.06996977	4.946324945	3.168792546	27.9104495	-0.365120056	-6.704250044	-2.818425655	0.462731756	0.03174985	0	0.059876667
1009	Flood Summer	Summer	Flood	85	47.30568	0	0	0	0	0.04730568	0	-87.28	30.36682214	4.88994741	8.02542997	30.1779499	0.9631328	0.09026688	0	1810.318774	0.06421501	4.946240068	3.168987453	27.91060019	0.056292658	-4.856442517	-2.267349715	0.462702759	0.03174985	0	0.049439211
1010	Flood Summer	Summer	Flood	86	354.97623	0	0	0	0	0.35497623	0	-87.27	30.36684366	4.54411495	7.46850753	29.46357489	0.89792138	0.19004695	0	1903.268885	0.17939982	13.28433037	18.13505459	26.95395041	8.740215418	10.66654706	-2.509624485	0.463167504	0.023073125	0	0.021072995
1011	Flood Summer	Summer	Flood	87	4904.21886	0	0	0	0	4.90421886	0	-87.25	30.36686435	4.13620496	8.83484745	29.33895015	7.55197183	0.50375328	375.144934	2103.521452	0.36965686	21.62062502	33.13267517	26.00872517	17.48442006	24.29782772	-3.330224984	0.462879002	0.016240375	0	0.21653355
1012	Flood Summer	Summer	Flood	88	3365.36387	0	0	0	0	3.36536387	0	-87.24	30.36688421	3.75467998	9.53144503	29.4470501	9.98010093	0.0564369	1335.992265	2649.584002	0.02380448	21.63192463	33.14452553	26.00055027	17.87724465	23.6130805	-3.44649983	0.457693502	0.015971925	0	0.0159098
1013	Flood Summer	Summer	Flood	89	0	0	0	0	0	0	0	-87.23	30.36690325	3.71753001	10.71399999	29.57807493	9.00857761	0.09051339	2185.874537	2298.548978	0.03436971	21.63152504	33.14280033	25.99677515	17.91399503	22.42880034	-3.58129978	0.449395001	0.01548435	0	0.003533467
1014	Flood Summer	Summer	Flood	90	1242.14181	0	0	0	0	1.24214181	0	-87.22	30.36692146	3.82758993	11.52265	29.64152527	9.06391869	0.08966333	1348.61061	1306.003223	0.04678087	21.60152531	33.10377407	25.9986248	17.77393538	21.58112407	-3.642900468	0.437216751	0.015075925	0	0.015496558
1015	Flood Summer	Summer	Flood	91	2308.82854	0	0	0	0	2.30882854	0	-87.21	30.36693883	4.12037754	11.66132498	29.57940054	5.89845242	0.40430174	385.4044856	357.7169708	0.15477805	21.53662491	33.02067566	26.00622511	17.41624737	21.35935068	-3.573175431	0.420366995	0.01454795	0	0.061308998
1016	Flood Summer	Summer	Flood	92	3234.01899	0	0	0	0	3.23401899	0	-87.2	30.36695538	4.75187504	11.28247523	29.34345007	3.77088823	0.28003954	154.3403358	205.9447629	0.2050781	21.40997505	32.85830021	26.02122545	16.65810001	21.57582498	-3.322224618	0.400353245	0.014404825	0	0.035142826
1017	Flood Summer	Summer	Flood	93	3076.57868	0	0	0	0	3.07657868	0	-87.19	30.3669711	5.61894489	10.75682473	29.06255055	2.66581842	0.36184189	0	527.6236353	0.16648869	21.25242472	32.65599918	26.03990078	15.63347983	21.89917445	-3.02264977	0.387748748	0.01531025	0	0.014067644
1018	Flood Summer	Summer	Flood	94	0	0	0	0	0	0	0	-87.16	30.36701329	5.49584758	6.28543514	28.74639988	0.19165669	0.10545418	0	624.7418179	0.17471668	13.30000997	16.50030553	26.11989975	7.804162386	10.21487039	-2.62650013	0.522557005	0.034882225	0	0.018371256
1019	Flood Summer	Summer	Flood	95	0	0	0	0	0	0	0	-87.15	30.3670257	5.21935511	5.4826526	28.49752474	0.30368078	0.13157079	0	398.8232531	0.19204184	13.25120997	16.43510473	26.12025023	8.031854864	10.95245213	-2.377274515	0.539812744	0.036814075	0	0.019503147
1020	Flood Summer	Summer	Flood	96	456.03263	0	0	0	0	0.45603263	0	-87.32	30.37575173	4.40774751	3.48465752	29.85737467	0.75352345	0.05563749	0	3664.189416	0.06180387	4.927482605	3.21299994	27.94659996	0.519735095	-0.27165758	-1.91077471	0.467033997	0.034934226	0	0.021580078
1021	Flood Summer	Summer	Flood	97	4139.0804	0	0	0	0	4.1390804	0	-87.31	30.37577657	4.39868498	3.08124006	29.88939952	1.2014055	0.09193082	0	3138.991472	0.07121114	4.920165062	3.230170012	27.96064949	0.521480082	0.148929952	-1.92875003	0.467648506	0.036189651	0	0.0517948
1022	Flood Summer	Summer	Flood	98	3979.84081	0	0	0	0	3.97984081	0	-87.3	30.37580059	4.39400006	2.84456491	29.90320015	1.313093	0.08978947	0	2871.587036	0.06214289	4.91704011	3.237494946	27.96665001	0.52304005	0.392930036	-1.936550141	0.467823997	0.036755249	0	0.081229315
1023	Flood Summer	Summer	Flood	99	4507.47233	0	0	0	0	4.50747233	0	-87.29	30.37582378	5.27092755	8.10654497	30.87840033	1.07389807	0.10098552	0	2798.377091	0.06541904	4.915992618	3.239957452	27.96865034	-0.354934932	-4.866587518	-2.909749989	0.4678685	0.036946599	0	0.106948298
1024	Flood Summer	Summer	Flood	100	9059.72959	9	1	0	2	9.05972959	0.220757141	-87.28	30.37584613	5.26823509	7.83212	30.8689003	1.31827136	0.10412269	0	2806.06633	0.05541649	4.90302515	3.270370007	27.9935503	-0.36520994	-4.561749993	-2.875349999	0.467733502	0.039589949	1	0.050486037
1025	Flood Summer	Summer	Flood	101	5493.67587	0	0	0	0	5.49367587	0	-87.27	30.37586766	5.68831742	10.12655759	29.51975012	0.99167198	0.21211458	0	2888.183941	0.22827815	21.60335016	33.10942554	26.00967503	15.91503274	22.98286795	-3.510075094	0.465859249	0.017068775	0	0.076639094
1026	Flood Summer	Summer	Flood	102	5527.67691	4	2	0	1	5.52767691	0.180907824	-87.25	30.37588836	5.30990243	10.12307	29.52477503	6.36978817	0.41574277	356.8027146	3052.468938	0.21762205	21.59930038	33.1022253	26.00572538	16.28939795	22.9791553	-3.519049646	0.4647725	0.0173835	1	0.080336111
1027	Flood Summer	Summer	Flood	103	0	0	0	0	0	0	0	-87.24	30.37590823	4.83946001	10.33759999	29.52545023	8.78123419	0.12287798	1137.848246	3451.530023	0.03071425	21.59342527	33.09282494	26.00185061	16.75396526	22.75522495	-3.523599625	0.460429005	0.017395225	0	0.050451561
1028	Flood Summer	Summer	Flood	104	1756.2035	0	0	0	0	1.7562035	0	-87.23	30.37592727	4.40503252	10.70562506	29.48702478	7.86616982	0.12450688	1653.883537	2589.474781	0.02740615	21.57672501	33.0703001	26.00047541	17.17169249	22.36467504	-3.486549373	0.451512992	0.017082425	0	0.0101198
1029	Flood Summer	Summer	Flood	105	1485.29435	0	0	0	0	1.48529435	0	-87.22	30.37594549	3.9782325	10.86039996	29.37365007	8.33218217	0.13421377	1788.693032	1768.529518	0.04328187	21.53480053	33.01587486	26.00327539	17.55656803	22.1554749	-3.370374676	0.439285256	0.016881	0	0.004870351
1030	Flood Summer	Summer	Flood	106	0	0	0	0	0	0	0	-87.21	30.37596287	3.83328503	10.73552513	29.21792508	8.43783841	0.17470233	1236.578037	1244.99545	0.12389625	21.46299982	32.92420006	26.01154995	17.62971479	22.18867493	-3.20637513	0.42492374	0.0167063	0	0.008394415
1031	Flood Summer	Summer	Flood	107	3800.94314	0	0	0	0	3.80094314	0	-87.2	30.37597943	4.37492001	10.53617525	29.07222509	6.0860652	0.18650154	975.2847402	1205.944763	0.05750299	21.34114981	32.7693243	26.02747488	16.9662298	22.23314905	-3.04475021	0.41630324	0.017323276	0	0.011586151
1032	Flood Summer	Summer	Flood	108	593.33333	0	0	0	0	0.59333333	0	-87.19	30.37599515	5.24684501	10.40904999	28.91112518	3.90797247	0.41928615	278.812974	1328.304518	0.26016203	21.18437481	32.5690012	26.047575	15.9375298	22.15995121	-2.863550183	0.426758252	0.019930825	0	0.017143281
1033	Flood Summer	Summer	Flood	109	1130.90214	0	0	0	0	1.13090214	0	-87.18	30.37601005	5.79121745	10.57689977	28.69307518	3.91370812	0.39015563	0	1940.680957	0.18811309	21.01569986	32.35062504	26.06680059	15.22448241	21.77372527	-2.626274586	0.471174501	0.0257843	0	0.028486496
1034	Flood Summer	Summer	Flood	110	3715.2956	19	4	0	2	3.7152956	0.538315175	-87.17	30.37602412	5.54664994	11.48612499	29.36035013	4.75842216	0.34174813	0	1970.015288	0.239436	20.85144997	32.13447475	26.0819006	15.30480003	20.64834976	-3.278449533	0.537542015	0.0335305	1	0.045517683
1035	Flood Summer	Summer	Flood	111	5965.32069	0	0	0	0	5.96532069	0	-87.16	30.37603736	5.36874747	10.24453497	29.58072472	5.04576051	0.25524317	433.92602	1613.093294	0.2312706	20.71972513	31.95812511	26.08887434	15.35097766	21.71359014	-3.49185038	0.590004996	0.03946135	0	0.106229756
1036	Flood Summer	Summer	Flood	112	6493.32057	0	0	0	0	6.49332057	0	-87.15	30.37604977	4.70151246	8.89662242	29.38432503	4.83056331	0.24284059	299.7904432	1382.493484	0.20465906	20.6013999	31.79925013	26.08782482	15.89988744	22.90262771	-3.296500209	0.627762243	0.043693325	0	0.092533322
1037	Flood Summer	Summer	Flood	113	85.70074	0	0	0	0	0.08570074	0	-87.14	30.37606135	4.51698017	4.93224734	28.36612463	1.54275218	0.25833181	0	1089.48408	0.20659222	13.2065599	16.37590492	26.11815023	8.689579727	11.44365758	-2.247974396	0.552950502	0.038287199	0	0.052186577
1038	Flood Summer	Summer	Flood	114	233.96956	0	0	0	0	0.23396956	0	-87.29	30.38484775	4.38804746	2.34935242	29.8962245	1.04961519	0.05341092	0	3798.377091	0.02266127	4.908645153	3.257187486	27.98277569	0.520597693	0.907835066	-1.913448812	0.467822246	0.038426175	0	0.059965765
1039	Flood Summer	Summer	Flood	115	123.3838	0	0	0	0	0.1233838	0	-87.28	30.38487012	4.38629258	2.14337498	29.88692522	0.75114542	0.04067451	0	3804.045535	0.04501111	4.902422547	3.271790028	27.99472523	0.516129967	1.128415048	-1.892199993	0.467766754	0.03967645	0	0.031592919
1040	Flood Summer	Summer	Flood	116	1060.94155	0	0	0	0	1.06094155	0	-87.25	30.38491236	5.75216758	10.63309979	29.59159994	1.83468074	0.3363259	0	4026.205501	0.24621894	17.41062009	25.62773007	26.50337505	11.65845251	14.99463028	-3.088224887	0.46782475	0.023865774	0	0.057276773
1041	Flood Summer	Summer	Flood	117	2363.15591	0	0	0	0	2.36315591	0	-87.24	30.38493224	5.56795502	10.79010009	29.57325029	5.32796808	0.37162219	309.9535521	3962.967937	0.16410884	21.56074028	33.04917984	26.00251999	15.99278526	22.25907975	-3.570730301	0.467563999	0.01915662	0	0.173938102
1042	Flood Summer	Summer	Flood	118	1827.24712	0	0	0	0	1.82724712	0	-87.23	30.38495128	5.09704006	10.81787515	29.468225	5.3492535	0.26456822	802.7753751	3182.362626	0.1410237	21.5387001	33.02007484	26.00252533	16.44166004	22.20219969	-3.46569967	0.460624747	0.019095075	0	0.041409994
1043	Flood Summer	Summer	Flood	119	0	0	0	0	0	0	0	-87.22	30.3849695	4.27215999	10.56434989	29.26350021	7.2517948	0.16698071	1069.868092	2559.24772	0.02873286	21.4963994	32.96549988	26.00549984	17.22423941	22.40114999	-3.25800037	0.452077255	0.019317225	0	0.011096833
1044	Flood Summer	Summer	Flood	120	3573.87432	0	0	0	0	3.57387432	0	-87.21	30.38498689	3.65172499	10.19492507	29.0632	9.03286915	0.06854219	1134.813403	2229.812976	0.05243063	21.43545008	32.88827515	26.01252508	17.78372509	22.69335008	-3.050674918	0.444779001	0.01979175	0	0.004377055
1045	Flood Summer	Summer	Flood	121	635.73256	0	0	0	0	0.63573256	0	-87.2	30.38500346	3.89620507	9.94163013	28.9456501	8.3611984	0.11291036	1332.939414	2195.213515	0.03054101	21.30574989	32.72502518	26.03084946	17.40954482	22.78339505	-2.914800643	0.446292505	0.021214125	0	0.003265958
1046	Flood Summer	Summer	Flood	122	63.59297	0	0	0	0	0.06359297	0	-87.19	30.38501919	4.48632014	9.82940769	28.8513999	7.72439637	0.08265321	1137.951263	2259.875131	0.02339897	21.14184999	32.51717472	26.05322456	16.65552985	22.68776703	-2.798175336	0.466378748	0.0245031	0	0.00696418
1047	Flood Summer	Summer	Flood	123	3635.56656	0	0	0	0	3.63556656	0	-87.18	30.38503409	4.80313242	9.85096741	28.72249985	7.53187792	0.04289856	671.3729973	2679.642643	0.01789157	20.98422527	32.31359959	26.07192469	16.18109285	22.46263218	-2.650575164	0.507909745	0.029829301	0	0.017419555
1048	Flood Summer	Summer	Flood	124	0	0	0	0	0	0	0	-87.17	30.38504816	4.59047008	9.78229976	28.84652519	6.95849078	0.07110842	675.0124355	2846.63267	0.03003003	20.83792496	32.12012482	26.08477497	16.24745488	22.33782506	-2.761750219	0.560356006	0.036021651	0	0.017013123
1049	Flood Summer	Summer	Flood	125	1608.00724	0	0	0	0	1.60800724	0	-87.16	30.38506141	4.01345241	9.0316875	29.17159986	6.3336123	0.04171274	1254.372613	2568.797689	0.01799358	20.69897509	31.93219996	26.09037495	16.68552268	22.90051246	-3.081224913	0.609519258	0.0416211	0	0.006937625
1050	Flood Summer	Summer	Flood	126	2581.11041	0	0	0	0	2.58111041	0	-87.15	30.38507382	3.29651004	8.13803244	29.22597504	5.53076151	0.16597013	854.7092938	2366.725623	0.15549648	20.55782509	31.74034977	26.08642483	17.26131505	23.60231733	-3.139550212	0.648240745	0.045983176	0	0.011259771
1051	Flood Summer	Summer	Flood	127	0	0	0	0	0	0	0	-87.14	30.38508541	2.53892499	7.61212754	29.2078495	2.28768935	0.34616738	27.58155132	2034.675399	0.26427274	20.42882538	31.57157469	26.07412481	17.88990039	23.95944715	-3.133724687	0.668612242	0.048283651	0	0.054382982
1052	Flood Summer	Summer	Flood	128	233.54697	0	0	0	0	0.23354697	0	-87.13	30.38509617	3.3858276	4.35321754	28.28204966	0.44232621	0.14651741	0	1562.072954	0.19694434	13.01861024	16.13525522	26.09755039	9.632782639	11.78203768	-2.184499268	0.585628495	0.0419705	0	0.02014686
1053	Flood Summer	Summer	Flood	129	0	0	0	0	0	0	0	-87.24	30.39395623	5.63415253	8.80435264	29.67659998	0.70297858	0.10237904	0	3654.233931	0.09543162	13.21235764	18.17393708	27.01932526	7.57820511	9.369584442	-2.657274724	0.469515756	0.033402625	0	0.022024084
1054	Flood Summer	Summer	Flood	130	599.68589	0	0	0	0	0.59968589	0	-87.23	30.39397528	5.80116749	10.97157502	29.50707483	2.02649507	0.25348687	0	2730.650823	0.1306655	21.51235008	32.98577499	26.00432539	15.71118259	22.01419997	-3.50274944	0.472386003	0.02102315	0	0.040218131
1055	Flood Summer	Summer	Flood	131	5958.55705	0	0	0	0	5.95855705	0	-87.22	30.39399351	4.62537766	10.42042494	29.22907496	5.93239358	0.34906844	69.86809154	1885.481317	0.14306767	21.45785046	32.91662502	26.00950003	16.8324728	22.49620008	-3.219574933	0.466657996	0.021537675	0	0.073154538
1056	Flood Summer	Summer	Flood	132	1795.98389	0	0	0	0	1.79598389	0	-87.21	30.39401091	3.82921249	9.88442516	29.01074982	8.45057168	0.15452836	302.103307	1281.85783	0.09798434	21.37509966	32.81335068	26.02024984	17.54588717	22.92892552	-2.990499976	0.467290252	0.022837901	0	0.028430549
1057	Flood Summer	Summer	Flood	133	279.73541	0	0	0	0	0.27973541	0	-87.2	30.39402747	3.6566025	9.50604725	28.90620041	9.16535193	0.10591246	353.5313115	1195.213515	0.07500776	21.24719954	32.65400028	26.0388999	17.59059704	23.14795303	-2.867300512	0.477504253	0.025034725	0	0.019791789
1058	Flood Summer	Summer	Flood	134	3894.64072	0	0	0	0	3.89464072	0	-87.19	30.39404321	3.7552675	9.25055241	28.87882471	8.05049391	0.08355328	930.6235316	1310.1941	0.03790254	21.10012531	32.46882629	26.05942535	17.34485781	23.21827388	-2.819399356	0.501591235	0.0285408	0	0.007626939
1059	Flood Summer	Summer	Flood	135	213.93778	0	0	0	0	0.21393778	0	-87.18	30.39405812	3.68226248	9.00992775	28.87150002	7.65399861	0.03086257	1671.372997	1920.017854	0.0111886	20.95932531	32.28787518	26.07620001	17.27706283	23.27794743	-2.795300012	0.540195257	0.0334063	0	0.001477518
1060	Flood Summer	Summer	Flood	136	1034.67642	0	0	0	0	1.03467642	0	-87.17	30.3940722	3.30028004	8.65384746	28.94437504	7.15813743	0.04419443	1672.838242	2709.283771	0.00783828	20.82252502	32.10632515	26.08760023	17.52224498	23.45247769	-2.856774809	0.586456254	0.038879225	0	0.000774613
1061	Flood Summer	Summer	Flood	137	2967.53065	0	0	0	0	2.96753065	0	-87.16	30.39408545	2.71689254	8.08234024	29.07655001	6.32505918	0.0467957	1984.537483	3533.601492	0.00867365	20.6795249	31.91030025	26.09185028	17.96263236	23.82796001	-2.984699729	0.630645752	0.0439507	0	0.000218025
1062	Flood Summer	Summer	Flood	138	0	0	0	0	0	0	0	-87.15	30.39409787	2.1261425	7.52011001	29.12322474	5.85864811	0.04983474	1432.409778	3319.104263	0.03591916	20.52249956	31.69215059	26.08504963	18.39635706	24.17204058	-3.038175111	0.667251751	0.0481024	0	0.000474576
1063	Flood Summer	Summer	Flood	139	1470.75441	0	0	0	0	1.47075441	0	-87.14	30.39410946	1.66769499	7.20111501	29.12232542	6.28704561	0.09295337	831.3114207	2933.223615	0.09680779	20.36811981	31.48527985	26.06709976	18.70042482	24.28416484	-3.055225658	0.6894804	0.050624821	0	0.001087471
1064	Flood Summer	Summer	Flood	140	2364.91857	0	0	0	0	2.36491857	0	-87.13	30.39412022	1.44079497	7.09834504	29.13090038	5.22940244	0.27696432	394.2088726	2502.167831	0.2399581	20.12947512	31.18585014	26.03460026	18.68868015	24.0875051	-3.096300122	0.714213744	0.0534314	0	0.004099909
1065	Flood Summer	Summer	Flood	141	2186.86565	0	0	0	0	2.18686565	0	-87.12	30.39413015	1.44674251	7.11271751	29.16710043	2.74042514	0.32266082	36.35978611	2256.183944	0.1689662	19.80077505	30.80217552	26.00047493	18.35403254	23.68945801	-3.1666255	0.734630764	0.055764774	0	0.02273608
1066	Flood Summer	Summer	Flood	142	1768.9986	0	0	0	0	1.7689986	0	-87.11	30.39413925	2.50626254	5.75675008	28.77019978	1.02257277	0.21263968	0	1944.68176	0.1691948	16.0054177	23.01522774	26.02182484	13.49915516	17.25847766	-2.748374943	0.678668246	0.051000025	0	0.030920914
1067	Flood Summer	Summer	Flood	143	0	0	0	0	0	0	0	-87.1	30.39414752	3.61713505	4.37345248	28.36654997	0.14633137	0.05475894	0	1779.5682	0.07878441	12.27491021	15.32055509	26.06724977	8.657775162	10.94710261	-2.299300195	0.613771498	0.045222949	0	0.031527981
1068	Flood Summer	Summer	Flood	144	0	0	0	0	0	0	0	-87.27	30.40293959	4.38635004	1.79052249	29.83214998	0.61038044	0.01443743	0	5452.488011	0.01458737	4.890275121	3.300287485	28.01802492	0.503925081	1.509764995	-1.814125059	0.467830747	0.04182075	0	0.015872492
1069	Flood Summer	Summer	Flood	145	0	0	0	0	0	0	0	-87.25	30.40296032	4.48943496	1.19000275	27.75790024	0.93960387	0.08668738	0	4453.386779	0.06490813	4.881700039	3.320405006	28.03450012	0.392265079	2.130402256	0.276599882	0.557908674	0.041782534	0	0.016288656
1070	Flood Summer	Summer	Flood	146	0	0	0	0	0	0	0	-87.24	30.40298021	4.53882503	0.3907245	26.74475002	0.87637939	0.02407526	0	3454.805652	0.0130215	4.86401999	3.361880004	28.06844997	0.32519496	2.971155504	1.323699954	0.461418502	0.052481525	0	0.057493066
1071	Flood Summer	Summer	Flood	147	0	0	0	0	0	0	0	-87.23	30.40299927	4.81555748	3.13929702	28.32017469	0.63576127	0.02914312	0	2457.378763	0.02607335	13.18062282	18.16695529	27.03855038	8.365065336	15.02765827	-1.281624313	0.472200252	0.037294025	0	0.010977044
1072	Flood Summer	Summer	Flood	148	435.7132	0	0	0	0	0.4357132	0	-87.22	30.4030175	4.56204498	5.48869133	29.10524988	1.70540743	0.20790543	0	1463.468032	0.18084416	17.2733022	25.48592472	26.530375	12.71125722	19.99723339	-2.574874876	0.472661503	0.03003445	0	0.018924974
1073	Flood Summer	Summer	Flood	149	2020.39998	0	0	0	0	2.02039998	0	-87.21	30.40303491	4.1491375	5.22662449	29.30824995	3.9884025	0.34566541	0	494.7393001	0.11685095	17.20741785	25.40683824	26.54067516	13.05828035	20.18021375	-2.767574787	0.477867752	0.030825025	0	0.10864815
1074	Flood Summer	Summer	Flood	150	3826.62932	0	0	0	0	3.82662932	0	-87.2	30.40305148	3.45609998	9.16410994	28.91355038	4.66574901	0.47077104	0	195.2135147	0.26902204	21.16587496	32.55554867	26.05042505	17.70977498	23.39143873	-2.863125327	0.5060625	0.028553425	0	0.022718777
1075	Flood Summer	Summer	Flood	151	494.02268	0	0	0	0	0.49402268	0	-87.19	30.40306722	3.27171004	8.847615	28.9283247	6.1725052	0.1201509	650.7040604	505.8083926	0.04028478	21.04912519	32.41009998	26.06617498	17.77741515	23.56248498	-2.862149716	0.532732248	0.0321284	0	0.010344673
1076	Flood Summer	Summer	Flood	152	529.77196	0	0	0	0	0.52977196	0	-87.18	30.40308213	2.96485997	8.48515511	28.97197437	6.93339013	0.07179567	926.0225178	1321.275616	0.02789286	20.92810011	32.25627613	26.07954979	17.96324014	23.77112102	-2.892424581	0.570179001	0.0367484	0	0.003394179
1077	Flood Summer	Summer	Flood	153	3536.76797	0	0	0	0	3.53676797	0	-87.17	30.40309622	2.47429246	8.03400016	29.02467489	7.0727496	0.03483844	1624.96534	2248.126222	0.01126586	20.79949999	32.08640003	26.08872461	18.32520753	24.05239987	-2.935950277	0.612425253	0.041745625	0	0.000379241
1078	Flood Summer	Summer	Flood	154	0	0	0	0	0	0	0	-87.16	30.40310947	1.88072497	7.51704752	29.06409979	6.2359605	0.06106569	2114.675498	3218.814033	0.00545793	20.6491251	31.87800026	26.09147501	18.76840013	24.36095274	-2.97262478	0.651889756	0.0463042	0	6.16E-05
1079	Flood Summer	Summer	Flood	155	768.91552	0	0	0	0	0.76891552	0	-87.15	30.4031219	1.37517503	7.10856748	29.06794977	5.57022539	0.02310732	2222.619568	4203.267306	0.01495254	20.4739995	31.62872505	26.08289957	19.09882447	24.52015757	-2.9850502	0.684948757	0.0500781	0	2.08E-05
1080	Flood Summer	Summer	Flood	156	1770.03262	0	0	0	0	1.77003262	0	-87.14	30.40313349	1.123285	6.95989514	29.06535005	5.7731086	0.04357407	1706.402021	3797.969552	0.02213891	20.30887508	31.39852524	26.05802536	19.18559008	24.4386301	-3.00732469	0.708025485	0.0527077	0	4.92E-05
1081	Flood Summer	Summer	Flood	157	0	0	0	0	0	0	0	-87.13	30.40314425	1.12228999	6.99889505	29.08992529	5.81275779	0.05194273	1320.920876	3472.384519	0.03351817	20.0922246	31.12089968	26.02202511	18.96993461	24.12200463	-3.067900182	0.726546004	0.054822225	0	0.000129253
1082	Flood Summer	Summer	Flood	158	3072.17116	0	0	0	0	3.07217116	0	-87.12	30.40315419	1.33378246	7.11818754	29.1487999	5.65590239	0.04554253	969.5745461	3209.946743	0.04449952	19.75615025	30.72074986	25.98550034	18.42236779	23.60256232	-3.163299564	0.74358201	0.056781176	0	0.000411976
1083	Flood Summer	Summer	Flood	159	1439.03818	0	0	0	0	1.43903818	0	-87.11	30.40316329	1.73063752	7.24025	29.23350048	5.11375779	0.15687714	561.0237463	2906.142999	0.13425503	19.26729965	30.1795249	25.96752501	17.53666213	22.9392749	-3.265975475	0.755617484	0.058195649	0	0.002152453
1084	Flood Summer	Summer	Flood	160	1236.98327	0	0	0	0	1.23698327	0	-87.1	30.40317157	2.28664249	7.30828512	29.33682489	3.23082579	0.32990746	160.9117866	2776.20736	0.1428638	18.58869982	29.47067547	25.98132467	16.30205733	22.16239035	-3.355500217	0.762896255	0.059096775	0	0.011800982
1085	Flood Summer	Summer	Flood	161	633.1218	0	0	0	0	0.6331218	0	-87.09	30.40317901	2.96121996	7.295295	29.44539976	1.03293164	0.13113163	0	2514.341634	0.17125328	17.68359995	28.57534981	26.03482485	14.72237999	21.28005481	-3.410574912	0.765810996	0.059530401	0	0.023577242
1086	Flood Summer	Summer	Flood	162	546.31984	0	0	0	0	0.54631984	0	-87.08	30.40318563	3.67075002	7.22442746	29.5305748	0.97150795	0.17372761	0	2230.510756	0.12942272	16.5636754	27.47742558	26.13007498	12.89292538	20.25299812	-3.400499822	0.765228748	0.059592024	0	0.020680967
1087	Flood Summer	Summer	Flood	163	2004.04234	0	0	0	0	2.00404234	0	-87.07	30.40319142	4.36895502	7.12782014	29.57730055	1.39715878	0.22317367	0	2223.570512	0.16327677	15.25865006	26.18317509	26.26347494	10.88969504	19.05535495	-3.313825609	0.762191996	0.0593935	0	0.014775577
1088	Flood Summer	Summer	Flood	164	1016.14904	0	0	0	0	1.01614904	0	-87.06	30.40319637	5.01978743	7.04407752	29.56907511	1.32531596	0.22693178	51.47358565	2129.289491	0.16946093	13.82395005	24.77412462	26.42507505	8.804162622	17.7300471	-3.144000056	0.757522747	0.059016401	0	0.009381835
1089	Flood Summer	Summer	Flood	165	1813.31986	0	0	0	0	1.81331986	0	-87.05	30.4032005	5.56473494	7.01998258	29.47372484	1.57130047	0.2778603	25.33909566	1816.75185	0.23972793	12.41417999	23.54129982	26.58852005	6.849445053	16.52131724	-2.88520479	0.752488208	0.05857848	0	0.004082663
1090	Flood Summer	Summer	Flood	166	2190.88958	0	0	0	0	2.19088958	0	-87.04	30.40320379	5.97389507	7.08570742	29.27085018	1.24416818	0.23735641	0	1738.825084	0.22886859	11.23879981	22.64152479	26.72559977	5.26490474	15.55581737	-2.545250414	0.748298258	0.058199749	0	0.002443805
1091	Flood Summer	Summer	Flood	167	1215.06525	0	0	0	0	1.21506525	0	-87.03	30.40320626	5.98084748	5.77678999	28.60912514	0.40039827	0.1228297	0	1597.954229	0.14982483	7.765535116	11.21328008	26.53259993	1.784687636	5.436490092	-2.076525214	0.605040237	0.044680225	0	0.001331527
1092	Flood Summer	Summer	Flood	168	0	0	0	0	0	0	0	-87.2	30.41207547	3.53746754	6.86899781	29.18650007	1.02035716	0.24257703	0	0	0.21395679	17.02792239	25.18871981	26.56689978	13.49045485	18.319722	-2.619600294	0.514776245	0.035610176	0	0.010102378
1093	Flood Summer	Summer	Flood	169	1594.73735	0	0	0	0	1.59473735	0	-87.19	30.41209122	3.02437752	8.61673736	29.00059986	3.97275371	0.29801753	0	153.3461347	0.14509063	20.99722481	32.34982586	26.07147551	17.97284729	23.7330885	-2.929124354	0.558056742	0.0350816	0	0.023276316
1094	Flood Summer	Summer	Flood	170	3693.41006	0	0	0	0	3.69341006	0	-87.18	30.41210614	2.69264001	8.26676989	29.0869751	4.93237549	0.26250272	439.7625559	1153.346135	0.13425289	20.88579988	32.21119976	26.08107471	18.19315987	23.94442987	-3.005900385	0.596850753	0.039759725	0	0.006939973
1095	Flood Summer	Summer	Flood	171	0	0	0	0	0	0	0	-87.17	30.41212023	2.21885246	7.84237266	29.14885044	6.59517001	0.08226751	716.1729595	2153.346135	0.07282923	20.76110029	32.04947519	26.08647442	18.54224783	24.20710253	-3.062376021	0.637594759	0.044563175	0	0.001421876
1096	Flood Summer	Summer	Flood	172	170.04221	0	0	0	0	0.17004221	0	-87.16	30.41213349	1.60324249	7.34510505	29.14782524	6.3716064	0.04050667	1412.641371	3153.346135	0.01070162	20.60477495	31.83344984	26.08562517	19.00153246	24.48834479	-3.062200068	0.672825247	0.048648575	0	0.000117862
1097	Flood Summer	Summer	Flood	173	2405.38507	0	0	0	0	2.40538507	0	-87.15	30.41214591	1.063978	6.96170247	29.1010499	5.72012582	0.03001386	2231.484625	4153.346135	0.01190421	20.40447474	31.54510021	26.07594967	19.34049674	24.58339774	-3.025100231	0.70162876	0.051954474	0	1.00E-05
1098	Flood Summer	Summer	Flood	174	0	0	0	0	0	0	0	-87.14	30.41215751	0.893473	6.91716993	29.06329918	5.5063339	0.00309354	2626.654656	4716.497076	0.00265412	20.25967503	31.33214998	26.0468998	19.36620203	24.41498005	-3.016399385	0.721623257	0.054243601	0	2.92E-06
1099	Flood Summer	Summer	Flood	175	2661.36927	0	0	0	0	2.66136927	0	-87.13	30.41216828	0.98239425	7.02935755	29.06909943	5.47714251	0.01594414	2266.606995	4455.747559	0.02429016	20.06752491	31.07210016	26.0072751	19.08513066	24.04274261	-3.061824326	0.737420768	0.056055825	0	8.91E-06
1100	Flood Summer	Summer	Flood	176	1342.676	0	0	0	0	1.342676	0	-87.12	30.41217822	1.29355499	7.19627249	29.125	5.4616952	0.015394	1871.218873	4171.800767	0.0220565	19.72957516	30.65177488	25.97064972	18.43602017	23.45550239	-3.154350281	0.751586258	0.057697026	0	3.41E-05
1101	Flood Summer	Summer	Flood	177	0	0	0	0	0	0	0	-87.11	30.41218733	1.77767497	7.33636749	29.21317435	5.52360978	0.01502964	1484.283129	3887.10009	0.01803011	19.21352482	30.05227518	25.95847511	17.43584985	22.71590769	-3.254699237	0.761107996	0.0588332	0	0.00015579
1102	Flood Summer	Summer	Flood	178	2433.64032	0	0	0	0	2.43364032	0	-87.1	30.4121956	2.38458747	7.39965999	29.31372547	6.00595021	0.07817154	1063.604865	3772.330347	0.05911399	18.48859978	29.25212479	25.983325	16.10401231	21.8524648	-3.330400465	0.766283989	0.059503325	0	0.000779687
1103	Flood Summer	Summer	Flood	179	1079.68742	0	0	0	0	1.07968742	0	-87.09	30.41220305	3.0634225	7.37408996	29.40877438	5.00289919	0.26982592	882.2434728	3431.320121	0.22044315	17.53712511	28.2335	26.05045033	14.47370261	20.85941004	-3.358324055	0.767561242	0.0597595	0	0.003439609
1104	Flood Summer	Summer	Flood	180	2806.14789	0	0	0	0	2.80614789	0	-87.08	30.41220967	3.75926	7.28182495	29.48012495	4.95542181	0.18115331	871.9336486	3228.361698	0.16746416	16.374475	27.00359964	26.1579752	12.615215	19.72177469	-3.322149753	0.765716001	0.059685625	0	0.006282275
1105	Flood Summer	Summer	Flood	181	1505.83654	0	0	0	0	1.50583654	0	-87.07	30.41221546	4.4338274	7.16341507	29.51227522	4.68701521	0.11558471	936.9327488	3223.570512	0.04940389	15.04257488	25.60795021	26.29969978	10.60874748	18.44453514	-3.212575437	0.761633247	0.05937315	0	0.011640636
1106	Flood Summer	Summer	Flood	182	126.15033	0	0	0	0	0.12615033	0	-87.06	30.41222042	5.05608749	7.06634247	29.48750067	3.98934509	0.06969339	1046.970492	3057.935434	0.03560686	13.61127496	24.16402531	26.4638505	8.555187468	17.09768284	-3.023650172	0.756254256	0.058915201	0	0.012166843
1107	Flood Summer	Summer	Flood	183	3737.57763	0	0	0	0	3.73757763	0	-87.05	30.41222454	5.59302747	7.03643763	29.38185024	4.6689599	0.07318428	1022.034797	2801.221851	0.0195006	12.15817499	22.81930017	26.63602543	6.565147522	15.78286254	-2.745824811	0.750522241	0.05840435	0	0.025841083
1108	Flood Summer	Summer	Flood	184	0	0	0	0	0	0	0	-87.04	30.41222784	6.03835249	7.10157001	29.18114996	4.07020698	0.07460109	915.1269676	2738.825084	0.0434109	10.87260008	22.01602554	26.7803998	4.834247589	14.91445553	-2.400750161	0.746197015	0.058008825	0	0.015525699
1109	Flood Summer	Summer	Flood	185	2910.35185	0	0	0	0	2.91035185	0	-87.03	30.41223031	6.43005001	7.26075244	28.89715004	2.89970589	0.13755769	629.0314337	2576.664618	0.08612119	9.328677416	20.90967512	26.96252537	2.898627406	13.64892268	-1.934624672	0.740724489	0.057500099	0	0.006900556
1110	Flood Summer	Summer	Flood	186	2033.57552	0	0	0	0	2.03357552	0	-87.02	30.41223194	6.793715	7.49295759	28.55515003	1.70014799	0.11734196	217.4058434	2429.82704	0.07917809	7.715602517	19.93770027	27.14907551	0.921887517	12.44474268	-1.406074522	0.735535488	0.057010349	0	0.005664284
1111	Flood Summer	Summer	Flood	187	893.38475	0	0	0	0	0.89338475	0	-87	30.41223275	7.1211375	7.75521505	28.19544983	0.79744682	0.14349937	0	2286.249973	0.09588991	6.081067562	19.1487999	27.33337498	-1.040069938	11.39358485	-0.862074853	0.730926514	0.05657015	0	0.003295662
1112	Flood Summer	Summer	Flood	188	0	0	0	0	0	0	0	-86.99	30.41223273	6.20500004	4.73397756	27.62474966	0.4229434	0.06793523	0	2134.520596	0.0619003	5.120400071	9.750705123	26.83699989	-1.084599969	5.016727563	-0.787749767	0.597130507	0.043927999	0	0.000956086
1113	Flood Summer	Summer	Flood	189	7199.28755	0	0	0	0	7.19928755	0	-87.19	30.42111521	3.90088995	3.37076926	29.74650002	0.99492126	0.09535744	0	350.3881953	0.07566784	8.873369932	10.61120242	27.5871253	4.972479982	7.240433159	-2.159374719	0.496864498	0.043685749	0	0.044717142
1114	Flood Summer	Summer	Flood	190	1899.14707	0	0	0	0	1.89914707	0	-87.18	30.42113013	3.22719008	6.43906078	29.56637478	0.84896094	0.18068345	0	1198.191968	0.15084578	12.82476246	17.83394033	27.1322751	9.597572383	11.39487955	-2.434099676	0.545125499	0.04083785	0	0.017508691
1115	Flood Summer	Summer	Flood	191	3643.82995	0	0	0	0	3.64382995	0	-87.17	30.42114422	2.64904499	8.16044235	29.41192484	4.32637407	0.29304482	15.28943281	2178.053079	0.17651478	20.6961751	31.97872543	26.08182478	18.04713011	23.81828308	-3.330100061	0.663194001	0.04748295	0	0.011142868
1116	Flood Summer	Summer	Flood	192	2782.57129	0	0	0	0	2.78257129	0	-87.16	30.42115749	2.09837505	7.75986993	29.37944984	6.15122199	0.05430279	880.8649836	3170.515169	0.0319932	20.56362486	31.80122519	26.07322502	18.46524981	24.04135526	-3.306224819	0.693238244	0.050969475	0	0.000566824
1117	Flood Summer	Summer	Flood	193	137.52427	0	0	0	0	0.13752427	0	-87.15	30.42116992	1.45501754	7.35021996	29.25215006	5.65344679	0.02944689	1820.257392	4166.583452	0.01607448	20.39847517	31.56542492	26.0550251	18.94345763	24.21520496	-3.197124959	0.717014	0.053708975	0	3.06E-05
1118	Flood Summer	Summer	Flood	194	2081.50727	0	0	0	0	2.08150727	0	-87.14	30.42118152	1.09136252	7.18832755	29.12685013	5.37897653	0.02774686	2782.855327	5164.171655	0.01609862	20.24757433	31.33529997	26.02580023	19.15621181	24.14697242	-3.101049902	0.733569235	0.055610199	0	2.00E-06
1119	Flood Summer	Summer	Flood	195	1913.65798	0	0	0	0	1.91365798	0	-87.13	30.42119229	1.07461275	7.22414243	29.07279968	4.96585851	0.05382331	2974.446602	5417.168772	0.01165573	20.05180025	31.05149984	25.98882532	18.9771875	23.82735741	-3.083974359	0.746742249	0.057126599	0	1.42E-06
1120	Flood Summer	Summer	Flood	196	2004.68551	0	0	0	0	2.00468551	0	-87.11	30.42121135	1.88346252	7.47438502	29.18217516	4.82856538	0.08592883	1757.336829	4875.800149	0.02440446	19.17552471	29.94697523	25.95630026	17.29206219	22.47259021	-3.225874901	0.765761748	0.05938145	0	6.83E-05
1121	Flood Summer	Summer	Flood	197	661.27904	0	0	0	0	0.66127904	0	-87.1	30.42121963	2.51169002	7.50960994	29.28125048	4.85722729	0.136451	1397.045525	4741.090098	0.07550343	18.41877508	29.06294966	25.99255037	15.90708506	21.55333972	-3.288700107	0.76922448	0.059860425	0	0.00042539
1122	Flood Summer	Summer	Flood	198	1132.92764	0	0	0	0	1.13292764	0	-87.09	30.42122708	3.19345755	7.44832504	29.37290049	5.11122259	0.17724759	1392.582119	4384.187359	0.13766417	17.41177464	27.91680002	26.07200003	14.21831709	20.46847498	-3.300900463	0.769082502	0.059962325	0	0.0013507
1123	Flood Summer	Summer	Flood	199	2801.48733	0	0	0	0	2.80148733	0	-87.08	30.4212337	3.87444246	7.31736255	29.43817472	5.30483469	0.08962073	1624.899625	4227.22844	0.06144001	16.17669988	26.51744986	26.19252539	12.30225742	19.20008731	-3.245649333	0.765919015	0.0597487	0	0.002083106
1124	Flood Summer	Summer	Flood	200	3517.18854	0	0	0	0	3.51718854	0	-87.06	30.42124445	5.12306261	7.0452199	29.42754984	3.79399221	0.06432493	2036.205332	4003.047327	0.04152657	13.26230001	23.29367495	26.52577496	8.139237404	16.24845505	-2.901774884	0.753963739	0.058716975	0	0.002286021
1125	Flood Summer	Summer	Flood	201	109.11183	0	0	0	0	0.10911183	0	-87.05	30.42124858	5.65260744	7.00839245	29.31272459	3.85672339	0.03687511	2018.730499	3791.689342	0.01248011	11.76180029	21.83997488	26.70677519	6.109192849	14.83158243	-2.605949402	0.747523755	0.05813075	0	0.003378252
1126	Flood Summer	Summer	Flood	202	836.7163	0	0	0	0	0.8367163	0	-87.04	30.42125188	6.11632252	7.08547508	29.10185003	3.70192499	0.03495793	1881.408032	3738.825084	0.0305081	10.46153736	21.13789988	26.84910011	4.345214841	14.0524248	-2.252749917	0.743314743	0.057742225	0	0.002519751
1127	Flood Summer	Summer	Flood	203	2977.11704	0	0	0	0	2.97711704	0	-87.03	30.42125434	6.53564751	7.28215754	28.79535008	3.29496881	0.08295562	1528.718976	3567.203861	0.04814751	8.885572434	20.1072998	27.03239965	2.349924924	12.82514226	-1.762950426	0.737908512	0.057235476	0	0.002387808
1128	Flood Summer	Summer	Flood	204	0	0	0	0	0	0	0	-87.02	30.42125598	6.92250752	7.57195258	28.41689968	2.30421789	0.04605352	1115.638078	3419.843587	0.01449409	7.22953248	19.28079987	27.21842527	0.30702496	11.70884729	-1.198474406	0.733032495	0.056772325	0	0.002539507
1129	Flood Summer	Summer	Flood	205	922.37114	0	0	0	0	0.92237114	0	-87	30.42125679	7.26166249	7.887905	28.02297497	1.918764	0.04173626	693.3836064	3285.81818	0.03294152	5.53411746	18.65517473	27.40320015	-1.72754503	10.76726973	-0.619774821	0.728812248	0.05636705	0	0.003135497
1130	Flood Summer	Summer	Flood	206	3935.09028	0	0	0	0	3.93509028	0	-86.99	30.42125677	7.5114826	8.11311483	27.71587467	1.63268116	0.13307358	241.1107269	3076.720187	0.09869153	3.912575007	18.18320036	27.57802486	-3.598907594	10.07008553	-0.137849806	0.725333497	0.056030026	0	0.003270979
1131	Flood Summer	Summer	Flood	207	1909.43442	0	0	0	0	1.90943442	0	-86.98	30.42125591	6.96406758	6.4395625	27.57332516	0.88700843	0.08227101	0	2897.024455	0.06001346	2.531565011	17.77545023	27.73017454	-4.432502569	11.33588773	0.156849382	0.722554252	0.0557592	0	0.010702326
1132	Flood Summer	Summer	Flood	208	4624.38752	0	0	0	0	4.62438752	0	-87.19	30.43013918	4.40118503	0.82850298	30.14890004	1.13273698	0.05784396	0	1315.634146	0.04885229	4.850605011	3.393347502	28.09422493	0.449419981	2.564844522	-2.05467511	0.469096996	0.044945651	0	0.134837251
1133	Flood Summer	Summer	Flood	209	2747.60304	0	0	0	0	2.74760304	0	-87.18	30.43015411	4.43843985	0.75679926	30.41762495	0.66260659	0.10163522	0	1751.904914	0.05937599	4.804146767	3.502333323	28.1833992	0.365706917	2.745534063	-2.23422575	0.474867006	0.039799433	0	0.046214359
1134	Flood Summer	Summer	Flood	210	657.95511	0	0	0	0	0.65795511	0	-87.17	30.43016821	3.95035744	9.11192012	29.88627482	1.24077077	0.265656	0	2527.416599	0.20062107	12.66827512	17.63818246	27.13447475	8.717917678	8.526262341	-2.751800066	0.586055763	0.04561165	0	0.018652339
1135	Flood Summer	Summer	Flood	211	1266.24013	0	0	0	0	1.26624013	0	-87.16	30.43018148	3.31014747	8.69282484	29.76132488	5.5216792	0.15224149	646.2957142	3419.954077	0.15100006	20.45982504	31.68082476	26.07195044	17.14967757	22.98799992	-3.689374444	0.712634251	0.0532134	0	0.006820917
1136	Flood Summer	Summer	Flood	212	2021.89693	0	0	0	0	2.02189693	0	-87.15	30.43019391	2.36849252	8.10477269	29.49559974	5.38502662	0.02140216	1646.180169	4359.396416	0.00971232	20.34394979	31.52337456	26.04675007	17.97545727	23.41860187	-3.448849671	0.730712995	0.05530285	0	0.000143772
1137	Flood Summer	Summer	Flood	213	2698.72264	0	0	0	0	2.69872264	0	-87.14	30.43020552	1.60754752	7.66918767	29.23047494	5.03142179	0.04048045	2646.064624	5320.957464	0.00891829	20.21969986	31.33364964	26.01157475	18.61215234	23.66446197	-3.218900195	0.743661508	0.056789875	0	4.73E-06
1138	Flood Summer	Summer	Flood	214	756.67481	0	0	0	0	0.75667481	0	-87.13	30.4302163	1.33472499	7.50983751	29.08212519	4.42538031	0.04225537	2391.090673	6294.508683	0.00562952	20.02372456	31.04067516	25.97727537	18.68899957	23.53083765	-3.104849818	0.754325733	0.058017524	0	3.08E-06
1139	Flood Summer	Summer	Flood	215	1642.08594	0	0	0	0	1.64208594	0	-87.12	30.43022624	1.55156746	7.54933751	29.07165003	3.7783835	0.05359407	1561.638017	6061.546675	0.01428217	19.66692543	30.55547476	25.96307468	18.11535797	23.00613725	-3.108575346	0.763676748	0.059116425	0	3.12E-05
1140	Flood Summer	Summer	Flood	216	1146.69236	0	0	0	0	1.14669236	0	-87.11	30.43023536	2.05147496	7.62428248	29.14547491	3.50296061	0.07183973	944.0549154	5868.330859	0.0107897	19.13005066	29.86660051	25.9774251	17.0785757	22.24231803	-3.168049812	0.769403234	0.059820825	0	0.000239977
1141	Flood Summer	Summer	Flood	217	597.28968	0	0	0	0	0.59728968	0	-87.1	30.43024364	2.67613494	7.61146748	29.24869967	2.67042297	0.12425291	408.1322849	5658.423079	0.05328273	18.36637449	28.93104982	26.02252531	15.69023955	21.31958234	-3.22617436	0.771521747	0.060143925	0	0.002260814
1142	Flood Summer	Summer	Flood	218	3353.32174	0	0	0	0	3.35332174	0	-87.09	30.43025109	3.36692995	7.48740232	29.34689999	1.60819655	0.16886804	392.582119	5354.273043	0.108129	17.28424978	27.63527584	26.108675	13.91731983	20.14787352	-3.238224987	0.770095259	0.060107025	0	0.005598096
1143	Flood Summer	Summer	Flood	219	0	0	0	0	0	0	0	-87.08	30.43025771	4.03012502	7.29711258	29.41399956	3.10244329	0.12461077	867.4604739	5226.528609	0.04754325	15.70733986	25.7151001	26.26576004	11.67721484	18.41798752	-3.14823952	0.764534187	0.05966282	0	0.004316342
1144	Flood Summer	Summer	Flood	220	2304.86247	0	0	0	0	2.30486247	0	-87.07	30.43026351	4.64903247	7.09535754	29.43734979	2.5419204	0.12181727	1354.161908	5223.570512	0.03959312	14.01087499	23.62952518	26.46089983	9.361842517	16.53416764	-2.97644996	0.756549001	0.05895335	0	0.002810995
1145	Flood Summer	Summer	Flood	221	1573.12669	0	0	0	0	1.57312669	0	-87.06	30.43026847	5.21995747	6.94559503	29.39919996	2.3311097	0.09519819	1482.028074	4965.001891	0.03141021	12.44222498	21.81259966	26.65285015	7.222267509	14.86700463	-2.746349809	0.748886257	0.0582533	0	0.002878514
1146	Flood Summer	Summer	Flood	222	0	0	0	0	0	0	0	-87.05	30.4302726	5.73435498	6.9006474	29.27732468	2.84568839	0.08307669	2093.933945	4786.078346	0.01128879	11.23563353	20.66200002	26.79823367	5.501278552	13.76135262	-2.479091012	0.743562003	0.057761166	0	0.001636628
1147	Flood Summer	Summer	Flood	223	3767.2443	0	0	0	0	3.7672443	0	-87.04	30.4302759	6.20083248	6.99645007	29.05189991	2.57607671	0.08733072	2841.337315	4738.825084	0.02718289	10.04944515	20.06690025	26.92635012	3.848612672	13.07045018	-2.125549793	0.739824995	0.057413825	0	0.000224998
1148	Flood Summer	Summer	Flood	224	0	0	0	0	0	0	0	-87.03	30.43027837	6.63683259	7.24340499	28.71569967	1.9680116	0.06323489	2441.40134	4561.710633	0.06410298	8.22652216	18.96051979	27.13660011	1.58968957	11.7171148	-1.579099557	0.733823609	0.05684608	0	0.000135875
1149	Flood Summer	Summer	Flood	225	0	0	0	0	0	0	0	-87.02	30.43028	7.04863238	7.61462248	28.28745031	1.8810001	0.01947399	2027.020745	4406.953454	0.01734029	6.382147551	18.29390001	27.33552456	-0.666484829	10.67927753	-0.951925751	0.729204476	0.056404025	0	0.000246341
1150	Flood Summer	Summer	Flood	226	3798.76746	0	0	0	0	3.79876746	0	-87	30.43028081	7.4122225	8.02081001	27.83839989	1.7473542	0.01100374	1588.861775	4285.533442	0.00504464	4.61548245	17.86162519	27.52097511	-2.796740051	9.840815185	-0.317424777	0.725556254	0.056051525	0	0.000472987
1151	Flood Summer	Summer	Flood	227	0	0	0	0	0	0	0	-86.99	30.43028079	7.6645	8.27996516	27.52232504	1.7109098	0.03110307	1091.807265	4041.47983	0.02208223	2.925154984	17.58545065	27.69602537	-4.739345016	9.305485489	0.173700332	0.722594246	0.055763326	0	0.001430554
1152	Flood Summer	Summer	Flood	228	2173.86141	0	0	0	0	2.17386141	0	-86.98	30.43027994	7.71794248	8.14158487	27.54885006	1.71686858	0.06345724	487.3464818	3867.634091	0.05738363	1.532062531	17.35014915	27.84415007	-6.18587995	9.208564285	0.295300006	0.720252007	0.0555343	0	0.005639622
1153	Flood Summer	Summer	Flood	229	3463.93038	0	0	0	0	3.46393038	0	-86.97	30.43027825	7.48350251	7.37648249	28.13382483	0.97955845	0.12407738	0	3756.505955	0.09093275	0.725703406	16.79431992	27.95673981	-6.757799104	9.417837426	-0.177085023	0.718335807	0.05534626	0	0.010539214
1154	Flood Summer	Summer	Flood	230	4320.56465	0	0	0	0	4.32056465	0	-87.19	30.43916314	4.40325999	0.83195502	30.21450043	1.20367371	0.05053569	0	2310.630153	0.05109327	4.848500093	3.398289998	28.09826597	0.445240103	2.566334978	-2.116234464	0.469732006	0.044334367	0	0.10226192
1155	Flood Summer	Summer	Flood	231	2440.40319	0	0	0	0	2.44040319	0	-87.18	30.43917807	4.4387275	0.75372025	30.41444969	0.69019628	0.10391473	0	2585.977551	0.07665502	4.804229895	3.502143304	28.1832339	0.365502395	2.748423054	-2.231215793	0.474861999	0.039802534	0	0.029658777
1156	Flood Summer	Summer	Flood	232	1704.79284	0	0	0	0	1.70479284	0	-87.17	30.43919218	5.64187503	10.2815752	30.43307543	1.27956562	0.25181448	0	3164.716734	0.19763134	17.15619001	25.80107236	26.53015976	11.51431498	15.51949716	-3.902915671	0.674113005	0.051601521	0	0.069095728
1157	Flood Summer	Summer	Flood	233	3286.8235	0	0	0	0	3.2868235	0	-87.16	30.43920545	4.73506749	9.67353749	30.17510033	5.34411959	0.08567917	578.8716387	3916.631887	0.09694712	20.1632247	31.27760029	26.10217524	15.42815721	21.6040628	-4.072925094	0.736397758	0.056003075	0	0.054120761
1158	Flood Summer	Summer	Flood	234	3163.00834	0	0	0	0	3.16300834	0	-87.15	30.43921789	3.28258246	8.73608232	29.71682453	5.39997571	0.02793868	1540.025913	4759.018446	0.00673456	20.07430029	31.16887522	26.07165003	16.79171783	22.4327929	-3.645174502	0.747976497	0.05734525	0	0.00059875
1159	Flood Summer	Summer	Flood	235	3771.6239	0	0	0	0	3.7716239	0	-87.14	30.4392295	2.0684225	8.00959015	29.29142523	4.8780668	0.03296034	2454.802279	5653.008738	0.00313508	20.0236001	31.10042524	26.02212524	17.9551776	23.09083509	-3.269299986	0.755430013	0.058194676	0	9.01E-06
1160	Flood Summer	Summer	Flood	236	1635.45299	0	0	0	0	1.63545299	0	-87.13	30.43924028	1.54789501	7.68095493	29.05022478	4.33195409	0.03230257	2081.505495	6577.59523	0.00196535	19.85230017	30.85727501	25.99715042	18.30440516	23.17632008	-3.053074359	0.761973247	0.058943301	0	4.48E-06
1161	Flood Summer	Summer	Flood	237	1266.91983	0	0	0	0	1.26691983	0	-87.12	30.43925023	1.76018	7.68305505	29.02720022	3.6245506	0.06435125	1090.323852	7028.9564	0.02883948	19.39877968	30.24741974	26.02047997	17.63859968	22.56436469	-3.006720255	0.76909399	0.059787341	0	5.50E-05
1162	Flood Summer	Summer	Flood	238	0	0	0	0	0	0	0	-87.11	30.43925935	2.29104	7.76793003	29.11380005	2.36466238	0.10034719	170.6489865	6863.030457	0.05139613	18.7187748	29.37510014	26.07789993	16.4277348	21.60717011	-3.035900117	0.772987008	0.060289624	0	0.001326139
1163	Flood Summer	Summer	Flood	239	0	0	0	0	0	0	0	-87.1	30.43926764	2.45729247	6.12452999	28.78639984	1.25846431	0.13190629	0	6592.952249	0.09390581	15.07097471	21.29657507	25.83505011	12.61368224	15.17204508	-2.951349734	0.696043007	0.05306075	0	0.002986101
1164	Flood Summer	Summer	Flood	240	1149.65511	0	0	0	0	1.14965511	0	-87.09	30.43927509	3.10858503	5.91531235	28.89424992	0.90155189	0.09491088	0	6333.670409	0.07100897	13.77537274	19.67542505	25.92660046	10.66678771	13.7601127	-2.967649464	0.691807486	0.05273025	0	0.003745424
1165	Flood Summer	Summer	Flood	241	2731.87518	0	0	0	0	2.73187518	0	-87.08	30.43928172	4.23289502	7.17978763	29.41705036	2.19572614	0.09287435	148.4840174	6226.053511	0.06640387	14.85605001	24.46764994	26.37925005	10.62315499	17.28786231	-3.03780031	0.760536	0.059319825	0	0.011245762
1166	Flood Summer	Summer	Flood	242	3999.12507	0	0	0	0	3.99912507	0	-87.07	30.43928751	4.8102076	6.91176486	29.44700003	1.24114531	0.09902541	354.1619078	6217.496962	0.05633372	13.0222249	21.93832541	26.60882473	8.212017303	15.02656055	-2.8381753	0.750468493	0.058396026	0	0.008660163
1167	Flood Summer	Summer	Flood	243	0	0	0	0	0	0	0	-87.06	30.43929247	5.34058499	6.72303987	29.41175032	1.7270965	0.03756037	689.3654654	5939.450853	0.03722846	11.50297523	20.04367542	26.80289984	6.162390235	13.32063555	-2.608850483	0.742432997	0.0576491	0	0.008692036
1168	Flood Summer	Summer	Flood	244	3420.87331	0	0	0	0	3.42087331	0	-87.05	30.43929661	5.82173252	6.66814506	29.28802538	1.88357949	0.02299009	1615.526357	5782.402944	0.01951758	10.25269771	19.03284979	26.94895029	4.430965186	12.36470473	-2.339075089	0.737397	0.057178699	0	0.001943985
1169	Flood Summer	Summer	Flood	245	476.99136	0	0	0	0	0.47699136	0	-87.04	30.43929991	6.27243006	6.78094995	29.05404997	1.8345015	0.01595159	2583.600582	5719.990037	0.0143052	8.942532301	18.35949993	27.09345007	2.670102241	11.57854998	-1.960599901	0.733387739	0.056800975	0	0.000236709
1170	Flood Summer	Summer	Flood	246	0	0	0	0	0	0	0	-87.03	30.43930238	6.70951009	7.07466257	28.6970501	1.7761232	0.00409905	3349.481713	5546.771192	0.00203222	7.403980017	17.61027479	27.2656002	0.694469927	10.53561222	-1.431449896	0.729027763	0.056384651	0	3.46E-05
1171	Flood Summer	Summer	Flood	247	3500.60126	0	0	0	0	3.50060126	0	-87.02	30.43930402	7.1362499	7.52330244	28.2324748	1.8062393	0.00204687	2929.379874	5391.502693	0.00070591	5.714217544	17.10052538	27.44525003	-1.422032356	9.577222939	-0.787224766	0.725335732	0.056028951	0	4.33E-05
1172	Flood Summer	Summer	Flood	248	433.9175	0	0	0	0	0.4339175	0	-87	30.43930482	7.5151701	8.00638986	27.76572514	1.83279291	0.00613477	2465.476831	5285.335118	0.0021178	3.930370092	16.80892515	27.62800026	-3.584800008	8.802535292	-0.137724881	0.722299993	0.055734225	0	7.50E-05
1173	Flood Summer	Summer	Flood	249	146.22409	0	0	0	0	0.14622409	0	-86.99	30.4393048	7.749385	8.25645733	27.53712511	1.90600871	0.00822104	1894.903929	5020.050928	0.00150215	2.224767506	16.70210028	27.79857492	-5.524617494	8.445642947	0.261449814	0.719901741	0.05550005	0	0.000369654
1174	Flood Summer	Summer	Flood	250	3848.7724	0	0	0	0	3.8487724	0	-86.98	30.43930395	7.7321651	7.97715223	27.75297499	1.9901102	0.01612319	1157.494545	4848.358299	0.00746811	0.870712474	16.66744995	27.93587494	-6.861452626	8.690297721	0.182899949	0.718071505	0.055320526	0	0.003614793
1175	Flood Summer	Summer	Flood	251	1452.6686	0	0	0	0	1.4526686	0	-86.97	30.43930226	7.30966008	6.7972275	28.68857527	1.99042618	0.04742016	484.4727848	4711.921773	0.06259547	0.397534259	16.06462479	28.02467489	-6.912125821	9.267397286	-0.663900378	0.716703758	0.055185875	0	0.014408112
1176	Flood Summer	Summer	Flood	252	4984.42445	0	0	0	0	4.98442445	0	-86.96	30.43929975	6.47239756	4.70067245	30.41729975	0.8589271	0.12147668	0	4451.577783	0.0867234	1.12697725	14.30734992	28.06802511	-5.34542031	9.60667747	-2.349274638	0.715680018	0.055084975	0	0.028916752
1177	Flood Summer	Summer	Flood	253	0	0	0	0	0	0	0	-86.95	30.4392964	5.203035	1.89254001	28.44887495	0.21139268	0.02193528	0	4331.51408	0.01989716	4.938690126	3.86470753	26.63749981	-0.264344874	1.97216752	-1.811375141	0.529346243	0.037517324	0	0.002037554
1178	Flood Summer	Summer	Flood	254	35.07675	0	0	0	0	0.03507675	0	-86.92	30.43928137	4.9691	1.47960249	27.39255047	0.71302371	0.0346087	0	4130.90142	0.03557245	5.86247015	1.019510031	26.15159988	0.89337015	-0.460092459	-1.240950586	0.467519999	0.031689599	0	0.006773717
1179	Flood Summer	Summer	Flood	255	6121.87499	0	0	0	0	6.12187499	0	-86.91	30.4392747	5.62209737	0.94849498	27.14960003	0.94168137	0.0262525	0	3979.331042	0.04527175	4.961235046	3.429755092	27.12580013	-0.660862324	2.481260112	-0.023799897	0.590510488	0.04327965	0	0.005755323
1180	Flood Summer	Summer	Flood	256	6287.43791	15	4	0	1	6.28743791	0.159047296	-86.9	30.4392672	5.15615237	0.99125774	29.73315048	0.84543668	0.01281471	0	3970.901269	0.00728237	4.961235046	3.429755092	27.12580013	-0.194917324	2.438497352	-2.607350347	0.590510488	0.04327965	1	0.007355466
1181	Flood Summer	Summer	Flood	257	199.2712	0	0	0	0	0.1992712	0	-86.89	30.43925886	5.25229239	0.69290426	30.8607502	0.69045647	0.03224686	0	3931.621417	0.01317979	4.510617495	4.634877622	27.61290026	-0.741674895	3.941973362	-3.247849943	0.652005732	0.049074675	0	0.089511749
1182	Flood Summer	Summer	Flood	258	1023.45401	0	0	0	0	1.02345401	0	-87.2	30.44817132	4.41553998	0.79822825	30.31590033	1.09552065	0.03176929	0	3304.059249	0.02314148	4.845552444	3.405202508	28.10387516	0.430012464	2.606974258	-2.21202517	0.470396757	0.043698751	0	0.089661001
1183	Flood Summer	Summer	Flood	259	6259.23328	0	0	0	0	6.25923328	0	-87.19	30.44818709	4.42797995	0.76958801	30.34959984	1.12691604	0.06698542	0	3308.644768	0.04619439	4.819380124	3.466606617	28.1541659	0.391400174	2.697018607	-2.195433936	0.473231336	0.0412271	0	0.071966593
1184	Flood Summer	Summer	Flood	260	1136.10549	0	0	0	0	1.13610549	0	-87.18	30.44820203	4.4395175	0.74674825	30.407475	0.68156131	0.0586738	0	3506.479487	0.02405826	4.804200053	3.502212465	28.18327522	0.364682553	2.755464215	-2.224199777	0.474866003	0.039797701	0	0.046956251
1185	Flood Summer	Summer	Flood	261	1194.93879	3	1	0	1	1.19493879	0.836862949	-87.17	30.44821614	5.57052755	5.76631209	30.57699967	0.63911388	0.17679277	0	3954.336152	0.17596539	12.28385735	17.0801872	27.2031002	6.713329796	11.31387511	-3.373899466	0.608409256	0.04823565	1	0.012286082
1186	Flood Summer	Summer	Flood	262	3981.91134	0	0	0	0	3.98191134	0	-87.16	30.44822941	5.34064007	9.81387734	30.32224941	4.81156412	0.1861516	219.0266256	4578.394171	0.15695573	19.69587469	30.57177496	26.2253747	14.35523462	20.75789762	-4.096874711	0.747371748	0.0573452	0	0.256912193
1187	Flood Summer	Summer	Flood	263	0	0	0	0	0	0	0	-87.15	30.44824186	3.58882499	8.66825009	29.75487518	5.4251961	0.04172498	1077.593947	5318.515956	0.01858181	19.65462542	30.54610014	26.20192528	16.06580043	21.87785005	-3.552949902	0.754766509	0.058209475	0	0.002247309
1188	Flood Summer	Summer	Flood	264	553.46389	0	0	0	0	0.55346389	0	-87.14	30.44825348	2.12370002	7.85669243	29.23767471	4.75032909	0.05032357	1936.504903	6131.918724	0.00953881	19.74432516	30.72452497	26.10405016	17.62062514	22.86783254	-3.133624551	0.761173502	0.058932325	0	1.81E-05
1189	Flood Summer	Summer	Flood	265	2061.19017	0	0	0	0	2.06119017	0	-87.13	30.44826426	1.53779999	7.55657494	28.95880032	4.15315981	0.03984805	2053.865747	6993.473991	0.00516706	19.61532545	30.5954752	26.0696249	18.07752546	23.03890026	-2.889175419	0.76701425	0.059591824	0	3.20E-06
1190	Flood Summer	Summer	Flood	266	4053.67731	0	0	0	0	4.05367731	0	-87.12	30.44827421	2.02323499	7.71441007	29.00404978	3.47701271	0.06940641	1053.865747	7337.965256	0.03815922	19.1027503	29.94492483	26.17275	17.07951531	22.23051476	-2.831299784	0.771775767	0.06015705	0	9.35E-05
1191	Flood Summer	Summer	Flood	267	1891.54916	0	0	0	0	1.89154916	0	-87.11	30.44828333	2.80218995	7.95730245	29.14812517	1.64086277	0.117518	53.86574732	7208.592746	0.03584788	18.49720001	29.18254995	26.28014994	15.69501006	21.2252475	-2.867975233	0.774427489	0.06049135	0	0.003013162
1192	Flood Summer	Summer	Flood	268	0	0	0	0	0	0	0	-87.1	30.44829162	1.50250497	1.3737725	27.51812506	0.49022976	0.02620423	0	7195.092881	0.01086653	6.460734963	0	25.00300026	4.958229993	-1.3737725	-2.515124801	0.466745496	0.031305825	0	0.035312593
1193	Flood Summer	Summer	Flood	269	574.47334	0	0	0	0	0.57447334	0	-87.08	30.44830571	2.98354498	4.25629252	28.50965023	0.50265051	0.0689525	0	7225.709886	0.06365154	10.55521739	12.06080008	25.70810032	7.571672405	7.804507556	-2.801549911	0.613002747	0.045254575	0	0.003537043
1194	Flood Summer	Summer	Flood	270	1077.54898	0	0	0	0	1.07754898	0	-87.07	30.4483115	4.18248758	5.29879495	29.02692509	0.6670049	0.05470765	0	7164.433389	0.03227524	10.65937483	15.11677504	26.32110023	6.476887253	9.817980086	-2.705824855	0.674476259	0.051146876	0	0.005502247
1195	Flood Summer	Summer	Flood	271	1898.14989	0	0	0	0	1.89814989	0	-87.06	30.44831647	5.48260009	6.31780243	29.47297526	1.8155128	0.06350104	462.6675834	6915.441635	0.04780508	10.82745004	18.44714975	26.92612553	5.344849947	12.12934732	-2.546849734	0.736734241	0.057104825	0	0.019057605
1196	Flood Summer	Summer	Flood	272	2040.40249	0	0	0	0	2.04040249	0	-87.05	30.4483206	5.90055251	6.26248503	29.35237551	1.91028029	0.01704788	1459.450607	6777.127538	0.00569546	9.714318085	17.39802017	27.06296005	3.813765575	11.13553514	-2.289415458	0.731963003	0.05665586	0	0.003940675
1197	Flood Summer	Summer	Flood	273	0	0	0	0	0	0	0	-87.04	30.44832391	6.31130743	6.38917995	29.12102461	1.733007	0.00862779	2456.327861	6694.329728	0.0034127	8.679304838	17.01585007	27.1711998	2.367997408	10.62667012	-1.949824811	0.729378	0.056412901	0	0.000386789
1198	Flood Summer	Summer	Flood	274	2721.24773	0	0	0	0	2.72124773	0	-87.03	30.44832638	6.72860253	6.71307003	28.76292515	1.71643	0.00583984	3454.512893	6536.370354	0.000551	7.306832552	16.29932451	27.32704973	0.578230022	9.586254482	-1.435875418	0.725623012	0.056053125	0	3.55E-05
1199	Flood Summer	Summer	Flood	275	1306.90593	0	0	0	0	1.30690593	0	-87.02	30.44832802	7.1470151	7.20080996	28.30557489	1.8026558	0.00516184	3823.098472	6377.041409	0.00114342	5.771742463	15.79144979	27.49247503	-1.375272637	8.590639825	-0.813099857	0.722499996	0.055751549	0	8.85E-06
1200	Flood Summer	Summer	Flood	276	0	0	0	0	0	0	0	-87	30.44832882	7.50050247	7.67015755	27.93924999	1.89862981	0.00803393	3305.809337	6238.807547	0.00221176	4.132925034	15.46132493	27.66362476	-3.367577436	7.79116738	-0.275625227	0.719980493	0.055506625	0	1.65E-05
1201	Flood Summer	Summer	Flood	277	4073.44991	0	0	0	0	4.07344991	0	-86.99	30.4483288	7.6319052	7.71807254	28.08517456	2.04464389	0.01149174	2566.873638	6005.685925	0.00089005	2.581184983	15.24185014	27.82540035	-5.050720217	7.523777598	-0.259774208	0.718030497	0.0553161	0	0.000160755
1202	Flood Summer	Summer	Flood	278	35.83509	0	0	0	0	0.03583509	0	-86.98	30.44832795	7.40888011	7.00416505	28.95387459	2.16264239	0.0117577	1896.640789	5835.628752	0.00194774	1.413710251	15.02067518	27.95614958	-5.995169859	8.016510132	-0.997725012	0.716576502	0.055173376	0	0.00250363
1203	Flood Summer	Summer	Flood	279	1269.75719	0	0	0	0	1.26975719	0	-86.97	30.44832626	6.82680249	5.50675499	30.20822477	2.13393129	0.01518855	1184.809635	5665.402783	0.00549163	1.089460984	14.3229003	28.04140043	-5.737341506	8.816145305	-2.166824337	0.715512246	0.055068551	0	0.030767053
1204	Flood Summer	Summer	Flood	280	4826.54039	2	1	0	1	4.82654039	0.207187741	-86.96	30.44832374	5.97264254	3.4032476	31.71367502	1.90290114	0.04366295	480.2430433	5436.556609	0.05989163	1.838990003	12.71172476	28.08580017	-4.133652537	9.308477158	-3.627874849	0.714728505	0.054991125	1	0.025664664
1205	Flood Summer	Summer	Flood	281	4858.77264	0	0	0	0	4.85877264	0	-86.95	30.44832039	5.5834701	2.35198498	32.15435028	0.9950131	0.11949181	0	5326.07653	0.07843745	3.126285017	10.77869987	28.11132526	-2.457185083	8.426714895	-4.043025016	0.714147747	0.054933699	0	0.21901852
1206	Flood Summer	Summer	Flood	282	85.8096	0	0	0	0	0.0858096	0	-86.94	30.44831622	5.11104512	1.60689497	28.50610018	0.30740439	0.04156409	0	5281.254941	0.06152758	5.195762634	5.003674865	27.14155006	0.084717514	3.396779895	-1.364550116	0.590650514	0.043293475	0	0.003395404
1207	Flood Summer	Summer	Flood	283	6856.96852	0	0	0	0	6.85696852	0	-86.92	30.44830536	5.46753502	0.74780475	29.36114979	1.19168692	0.13794958	0	5105.890649	0.07561535	4.871497512	5.068562567	27.62287521	-0.596037508	4.320757817	-1.738274576	0.652005732	0.049074675	0	0.043763766
1208	Flood Summer	Summer	Flood	284	4939.70377	0	0	0	0	4.93970377	0	-86.91	30.44829869	5.00016749	1.14458254	28.21085024	0.79735737	0.04437517	0	4977.637802	0.05198221	4.961235046	3.429755092	27.12580013	-0.038932444	2.285172552	-1.085050107	0.590510488	0.04327965	0	0.009891573
1209	Flood Summer	Summer	Flood	285	1175.86968	0	0	0	0	1.17586968	0	-86.9	30.44829118	4.92362738	1.19426176	28.6642251	0.82683226	0.01008513	0	4970.901269	0.003516	5.411852598	2.224632561	26.63870001	0.488225218	1.030370801	-2.025525092	0.529015243	0.037484625	0	0.012619026
1210	Flood Summer	Summer	Flood	286	0	0	0	0	0	0	0	-87.2	30.45719525	4.43876243	0.723984	30.37870025	1.21560935	0.03587679	0	4304.059249	0.01749692	4.817645073	3.470672488	28.1574502	0.378882643	2.746688488	-2.221250051	0.473606505	0.0408747	0	0.08927011
1211	Flood Summer	Summer	Flood	287	2898.80068	0	0	0	0	2.89880068	0	-87.16	30.45725337	4.68198752	8.68133235	30.09027481	2.52082702	0.30046793	0	5346.310465	0.19541598	18.90292501	29.29314995	26.46539974	14.22093749	20.6118176	-3.624875068	0.754120499	0.058228825	0	0.106562546
1212	Flood Summer	Summer	Flood	288	3150.19746	0	0	0	0	3.15019746	0	-87.15	30.45726582	3.30054998	7.76347518	29.64547539	4.29640091	0.08991579	617.04138	5992.324621	0.0356734	18.85372496	29.26732492	26.48195028	15.55317498	21.50384974	-3.163525107	0.758551255	0.058756351	0	0.004184667
1213	Flood Summer	Summer	Flood	289	2393.46919	0	0	0	0	2.39346919	0	-87.14	30.45727744	2.00434748	7.22247243	29.19312525	3.97007629	0.04594515	1573.870955	6725.538874	0.02538688	19.17417526	29.85662508	26.33529949	17.16982778	22.63415265	-2.857825758	0.763211772	0.059269524	0	4.80E-05
1214	Flood Summer	Summer	Flood	290	0	0	0	0	0	0	0	-87.13	30.45728822	1.60009998	7.23371994	28.96527481	3.7751708	0.01584743	2123.106799	6658.638979	0.01278546	19.28069973	30.16482544	26.23995018	17.68059975	22.9311055	-2.72532463	0.768003762	0.05979405	0	6.36E-06
1215	Flood Summer	Summer	Flood	291	0	0	0	0	0	0	0	-87.12	30.45729818	2.496405	7.72153747	29.10925055	3.4066585	0.04704748	1144.682311	6360.467619	0.01926987	18.63247442	29.40490007	26.44792461	16.13606942	21.6833626	-2.661325936	0.771932006	0.060251149	0	0.000351395
1216	Flood Summer	Summer	Flood	292	0	0	0	0	0	0	0	-87.11	30.4573073	3.59960747	8.18551493	29.31032467	2.3617872	0.09046192	228.050299	6210.766749	0.03306712	17.97160006	28.61864996	26.62060022	14.37199259	20.43313503	-2.689724447	0.774346992	0.060542501	0	0.010525071
1217	Flood Summer	Summer	Flood	293	0	0	0	0	0	0	0	-87.1	30.4573156	2.29230001	3.21455008	28.04475021	0.63345529	0.09592806	0	6195.092881	0.08639058	11.9208076	13.96955013	25.91837502	9.62850759	10.75500005	-2.126375195	0.620748736	0.045963075	0	0.003046325
1218	Flood Summer	Summer	Flood	294	297.75358	0	0	0	0	0.29775358	0	-87.07	30.45733549	3.53265491	3.71533996	28.64679957	0.43555215	0.05086962	0	6697.558724	0.06201196	8.576292396	8.780799866	25.99307489	5.043637486	5.065459906	-2.653724676	0.600359254	0.044071726	0	0.006662214
1219	Flood Summer	Summer	Flood	295	3615.20433	0	0	0	0	3.61520433	0	-87.06	30.45734045	5.63146758	5.70274246	29.57760048	2.1558295	0.09180232	387.4562288	7136.275474	0.08073431	10.0813601	16.71657467	27.06107473	4.449892522	11.01383221	-2.516525746	0.730565503	0.056512576	0	0.047996097
1220	Flood Summer	Summer	Flood	296	1727.4677	0	0	0	0	1.7274677	0	-87.04	30.45734789	6.30367494	5.79770255	29.24627495	1.6376001	0.00732161	2291.017008	7674.620078	0.00409027	8.480545044	15.60772491	27.24655008	2.176870104	9.810022355	-1.999724867	0.725347504	0.056020601	0	0.000760427
1221	Flood Summer	Summer	Flood	297	1969.14599	0	0	0	0	1.96914599	0	-87.03	30.45735036	6.68140495	6.13499498	28.90342474	1.7090434	0.00867947	3232.419358	7526.59186	0.00212301	7.351555109	14.90147519	27.37972498	0.670150159	8.766480211	-1.523699761	0.7223095	0.055728825	0	8.73E-05
1222	Flood Summer	Summer	Flood	298	0	0	0	0	0	0	0	-87.02	30.457352	7.07005751	6.62562752	28.48525	1.8495364	0.00980609	3526.038157	7364.531166	0.00157043	6.075964928	14.33582497	27.52337503	-0.994092582	7.710197446	-0.961874966	0.719839752	0.055490149	0	2.75E-05
1223	Flood Summer	Summer	Flood	299	3106.94855	0	0	0	0	3.10694855	0	-87	30.45735281	7.37635756	7.02939248	28.26329994	1.9724981	0.00832889	2944.424177	7196.531923	0.00206662	4.736007452	13.81752491	27.67430019	-2.640350108	6.78813243	-0.588999746	0.717907757	0.055302375	0	6.85E-05
1224	Flood Summer	Summer	Flood	300	803.31432	0	0	0	0	0.80331432	0	-86.99	30.45735279	7.39119005	6.83579755	28.84175014	2.1228384	0.01076855	2324.646429	6995.399598	0.00112729	3.547977448	13.17799997	27.81990051	-3.843212603	6.342202423	-1.021849627	0.716460258	0.05516105	0	0.000860228
1225	Flood Summer	Summer	Flood	301	168.67966	0	0	0	0	0.16867966	0	-86.98	30.45735193	6.95358753	5.67885244	30.54487467	2.2723055	0.00722733	1683.634592	6826.605867	0.00287754	2.709772468	12.48897505	27.94077539	-4.243815062	6.810122608	-2.604099276	0.715414509	0.055058576	0	0.03220686
1226	Flood Summer	Summer	Flood	302	5503.65429	1	0	0	1	5.50365429	0.181697459	-86.97	30.45735025	6.43262255	4.41396749	31.67659998	2.1910905	0.01519053	1118.836549	6623.850684	0.00438203	2.311250001	12.0224998	28.0237751	-4.121372549	7.60853231	-3.652824879	0.714675248	0.054985775	1	0.040446333
1227	Flood Summer	Summer	Flood	303	0	0	0	0	0	0	0	-86.96	30.45734773	5.89414239	3.11039752	32.28520107	1.9613695	0.02426635	635.4930187	6426.069028	0.01917893	2.587650001	11.30212498	28.07482529	-3.306492389	8.191727457	-4.210375783	0.714150742	0.054934024	0	0.406280024
1228	Flood Summer	Summer	Flood	304	4080.342	0	0	0	0	4.080342	0	-86.95	30.45734438	5.56815994	2.22672498	32.29355049	1.67506564	0.07975275	221.2414002	6322.353275	0.05287366	3.551024973	10.01610255	28.1086998	-2.017134967	7.789377572	-4.184850691	0.713787749	0.054898125	0	0.531347327
1229	Flood Summer	Summer	Flood	305	9765.40989	0	0	0	0	9.76540989	0	-86.94	30.4573402	5.50558245	1.82339748	31.52807474	1.2090683	0.15115013	0	6281.169278	0.09194578	4.733756065	8.686297989	28.13236008	-0.771826385	6.862900509	-3.395714663	0.713653207	0.05488476	0	0.386489765
1230	Flood Summer	Summer	Flood	306	9653.51526	3	0	0	1	9.65351526	0.103589208	-86.93	30.45733518	5.38719749	1.42247498	29.61327505	1.09682925	0.16692067	0	6226.052023	0.08780467	5.717689991	7.065002561	28.14387512	0.330492501	5.642527581	-1.469399928	0.71351175	0.054870751	1	0.035304172
1231	Flood Summer	Summer	Flood	307	2167.25414	0	0	0	0	2.16725414	0	-86.92	30.45732934	5.03354001	1.40720499	28.06542444	0.76658213	0.08234735	0	6088.383373	0.07327469	5.707665086	2.467077553	26.64650011	0.674125076	1.059872563	-1.418924329	0.529014006	0.0374845	0	0.004234644
1232	Flood Summer	Summer	Flood	308	0	0	0	0	0	0	0	-87.16	30.4662773	4.19409496	3.7506015	30.1050005	0.6902837	0.11734876	0	6180.969017	0.1200966	11.17176974	15.26603282	27.52052498	6.977674778	11.51543132	-2.584475521	0.616112754	0.049147899	0	0.020936157
1233	Flood Summer	Summer	Flood	309	0	0	0	0	0	0	0	-87.15	30.46628976	3.12621999	6.44248748	29.61427498	3.2374418	0.12915026	377.843646	6747.540053	0.12106728	17.48514986	27.00964975	26.91452503	14.35892987	20.56716227	-2.699749948	0.759316996	0.058983175	0	0.016073598
1234	Flood Summer	Summer	Flood	310	687.06105	0	0	0	0	0.68706105	0	-87.14	30.46630138	2.13984743	6.37797999	29.32072544	3.6801657	0.01499511	1377.843646	6227.882311	0.0204694	17.91052532	27.87580013	26.82969999	15.77067789	21.49782014	-2.491025447	0.762969762	0.059371275	0	0.000448449
1235	Flood Summer	Summer	Flood	311	3158.88468	0	0	0	0	3.15888468	0	-87.13	30.46631217	1.98129743	6.91566753	29.20724964	3.5834811	0.02728681	2377.843646	5739.97276	0.0207025	18.19275045	28.60937452	26.75215006	16.21145302	21.69370699	-2.455099581	0.767103002	0.059804649	0	7.17E-05
1236	Flood Summer	Summer	Flood	312	3205.56015	0	0	0	0	3.20556015	0	-87.12	30.46632213	3.01908505	7.75078499	29.35349989	3.31924289	0.04827923	1521.020266	5391.230154	0.01569491	17.61797428	28.0845747	26.93470001	14.59888923	20.33378971	-2.418799878	0.770479247	0.060184225	0	0.001902668
1237	Flood Summer	Summer	Flood	313	2104.74318	0	0	0	0	2.10474318	0	-87.11	30.46633126	4.48161006	8.44717527	29.57287455	2.71881181	0.03841014	589.3733168	5213.773859	0.01185526	16.94215012	27.37025023	27.08249998	12.46054006	18.92307496	-2.490374569	0.772824749	0.060451049	0	0.033259618
1238	Flood Summer	Summer	Flood	314	540.93396	0	0	0	0	0.54093396	0	-87.1	30.46633956	3.57053998	5.23667747	28.6844244	1.0674667	0.14152388	0	5195.092881	0.10664376	11.46503258	13.42789984	26.09022522	7.894492598	8.191222368	-2.59419918	0.620293483	0.045940226	0	0.013878624
1239	Flood Summer	Summer	Flood	315	0	0	0	0	0	0	0	-87.07	30.46635945	3.70487505	3.43533248	28.75364971	0.36144064	0.02842842	0	5784.727777	0.02694803	7.318102479	4.015100002	25.54107523	3.613227429	0.579767522	-3.21257448	0.532185257	0.037562725	0	0.043800364
1240	Flood Summer	Summer	Flood	316	2105.00474	0	0	0	0	2.10500474	0	-87.06	30.46636442	5.75429511	4.94906509	29.69992542	1.9432693	0.13066792	70.29368101	6286.419962	0.10295941	9.362040043	15.05784988	27.19152498	3.607744933	10.10878479	-2.508400438	0.724782258	0.0559554	0	0.077471588
1241	Flood Summer	Summer	Flood	317	769.89976	0	0	0	0	0.76989976	0	-87.05	30.46636856	5.96756243	4.88673508	29.61412478	2.0681326	0.04315866	1006.494447	6897.346528	0.0167103	8.853349924	14.32227516	27.26609993	2.885787494	9.435540082	-2.34802485	0.722134009	0.055702024	0	0.028242365
1242	Flood Summer	Summer	Flood	318	3205.59242	0	0	0	0	3.20559242	0	-87.04	30.46637186	6.2377224	5.01165009	29.41727447	1.779406	0.0178997	1914.089299	7434.089612	0.00514378	8.320789814	14.24567485	27.31702471	2.083067414	9.234024759	-2.100249762	0.721544996	0.055649025	0	0.003172356
1243	Flood Summer	Summer	Flood	319	0	0	0	0	0	0	0	-87.03	30.46637434	6.56431746	5.35293496	29.09557486	1.84551251	0.01366366	2812.866821	7204.941879	0.00158081	7.466537356	13.55552506	27.42437553	0.902219896	8.202590105	-1.671199326	0.719264761	0.05542965	0	0.000454102
1244	Flood Summer	Summer	Flood	320	2492.93198	0	0	0	0	2.49293198	0	-87.02	30.46637598	6.92202258	5.8598175	28.69360018	1.9644347	0.00695828	2629.379568	7021.533431	0.0040893	6.495579958	12.90475011	27.54312515	-0.426442622	7.044932609	-1.150475027	0.717484504	0.055257725	0	0.000367317
1245	Flood Summer	Summer	Flood	321	1620.00845	0	0	0	0	1.62000845	0	-87	30.46637678	7.23067259	6.3191899	28.42167521	1.96345631	0.00782951	2172.244066	6975.278182	0.00417745	5.529760122	12.08657503	27.67100048	-1.700912468	5.767385131	-0.750674729	0.716172501	0.055130525	0	0.000561305
1246	Flood Summer	Summer	Flood	322	3900.79884	0	0	0	0	3.90079884	0	-86.98	30.46637591	7.01638245	5.51932001	30.09979963	2.18923231	0.01555661	920.6163565	7075.142782	0.01163905	4.450390041	9.26769495	27.9072504	-2.565992409	3.74837494	-2.192549226	0.714654744	0.054982925	0	0.091622079
1247	Flood Summer	Summer	Flood	323	1377.67356	0	0	0	0	1.37767356	0	-86.97	30.46637422	6.51248753	4.41445243	31.51329994	1.92624947	0.06433804	275.8368044	7302.681759	0.06994157	3.796512425	9.39283514	27.98495007	-2.715975105	4.97838271	-3.528349874	0.714267507	0.05494515	0	0.334167662
1248	Flood Summer	Summer	Flood	324	2348.35223	0	0	0	0	2.34835223	0	-86.96	30.4663717	6.02403748	3.32533002	32.22630024	1.0573496	0.09379058	0	7418.394606	0.06445536	3.941807509	7.814822376	27.56867504	-2.082229972	4.489492356	-4.657625199	0.652377248	0.049111299	0	0.10345462
1249	Flood Summer	Summer	Flood	325	1165.84696	0	0	0	0	1.16584696	0	-86.95	30.46636835	5.25866008	1.94056752	29.84767532	0.69601864	0.03867207	0	7319.645529	0.02532981	5.24429512	3.288332522	26.63595009	-0.01436496	1.347765002	-3.211725232	0.529083505	0.037491375	0	0.012206739
1250	Flood Summer	Summer	Flood	326	0	0	0	0	0	0	0	-87.16	30.47530123	4.15283752	4.06555285	29.96795034	0.73506303	0.07728551	0	6681.267693	0.05040825	10.26803994	13.7507323	27.72585011	6.115202422	9.685179453	-2.242100235	0.616022997	0.04914195	0	0.01993141
1251	Flood Summer	Summer	Flood	327	3310.06059	0	0	0	0	3.31006059	0	-87.15	30.47531369	3.35247999	5.05769741	29.70047522	1.98560579	0.0927103	393.2506177	6078.228058	0.07225525	15.58500004	23.81965017	27.36862469	12.23252005	18.76195276	-2.331850533	0.758099496	0.058999299	0	0.021585717
1252	Flood Summer	Summer	Flood	328	2745.91499	0	0	0	0	2.74591499	0	-87.14	30.47532532	2.22579002	5.38151252	29.48244953	2.77927729	0.07908795	1272.135899	5416.787762	0.02410009	15.89751987	24.62730026	27.45344048	13.67172985	19.24578774	-2.029009055	0.76074419	0.059285619	0	0.005126309
1253	Flood Summer	Summer	Flood	329	94.18531	0	0	0	0	0.09418531	0	-87.13	30.47533611	1.7941525	6.47230983	29.39414978	2.87252271	0.0473984	1927.139053	4851.962903	0.00388429	16.57942486	26.20695019	27.39607429	14.78527236	19.73464036	-1.998075485	0.764585748	0.059655825	0	0.00194615
1254	Flood Summer	Summer	Flood	330	0	0	0	0	0	0	0	-87.12	30.47534608	2.97433251	7.75588489	29.55704928	2.5388177	0.0581365	1597.658791	4435.670953	0.00580184	16.08130026	25.98212576	27.52472544	13.10696775	18.22624087	-2.032323843	0.767569751	0.059976249	0	0.012511681
1255	Flood Summer	Summer	Flood	331	2968.63851	7	1	0	1	2.96863851	0.336854756	-87.11	30.47535521	4.92585242	8.70785999	29.79817486	2.079544	0.04401555	679.6288076	4218.204842	0.01705438	15.31057525	25.24607515	27.609375	10.38472283	16.53821516	-2.18879986	0.769946486	0.060230225	1	0.029419183
1256	Flood Summer	Summer	Flood	332	2197.56172	0	0	0	0	2.19756172	0	-87.1	30.47536351	4.05115003	5.58079737	28.86307478	1.17374605	0.11432065	0	4195.092881	0.08671425	12.51779759	18.28427505	27.02682495	8.466647559	12.70347768	-1.836249829	0.694940239	0.053092175	0	0.018084809
1257	Flood Summer	Summer	Flood	333	2258.12306	0	0	0	0	2.25812306	0	-87.06	30.47538838	5.79576004	4.08739257	29.8427248	1.1250368	0.14385791	0	5487.415079	0.1029453	8.223164916	10.27852488	26.73310041	2.427404876	6.191132306	-3.109624386	0.656913511	0.04947165	0	0.031710961
1258	Flood Summer	Summer	Flood	334	5793.82396	0	0	0	0	5.79382396	0	-87.05	30.47539252	5.91084754	3.96261257	29.79480028	2.300047	0.03323491	576.9096381	6177.866737	0.0141691	8.497260094	13.08082509	27.34990025	2.586412554	9.11821252	-2.444900034	0.718290493	0.0553267	0	0.105695694
1259	Flood Summer	Summer	Flood	335	0	0	0	0	0	0	0	-87.04	30.47539582	6.10081994	4.04322499	29.63427496	2.030688	0.01134195	1522.459176	6434.089612	0.00570436	8.180979967	13.03215003	27.38020039	2.080160027	8.98892504	-2.254074574	0.718179509	0.0553189	0	0.014840097
1260	Flood Summer	Summer	Flood	336	1604.57026	0	0	0	0	1.60457026	0	-87.03	30.4753983	6.37332261	4.38748253	29.34077501	1.9857021	0.00654323	2180.635551	6241.845169	0.00331592	7.585105062	12.38742518	27.46204996	1.211782452	7.999942654	-1.878725049	0.716614246	0.055168175	0	0.003329693
1261	Flood Summer	Summer	Flood	337	2132.40332	0	0	0	0	2.13240332	0	-87.02	30.47539994	6.70822013	4.95665753	28.93854999	1.9317251	0.00941541	1739.13118	6029.210177	0.00425241	6.897497535	11.68957496	27.5562253	0.189277405	6.732917427	-1.38232469	0.715502739	0.05506125	0	0.00368741
1262	Flood Summer	Summer	Flood	338	0	0	0	0	0	0	0	-87	30.47540075	7.05336749	5.58862745	28.52010011	1.8619901	0.01393901	1307.526129	5975.278182	0.01206641	6.243822575	10.6863749	27.66197491	-0.809544915	5.097747453	-0.858125203	0.714802995	0.054994251	0	0.004067141
1263	Flood Summer	Summer	Flood	339	3283.41796	0	0	0	0	3.28341796	0	-86.99	30.47540072	7.31021011	6.02508986	28.28599978	1.99040989	0.03636197	763.5028467	5978.397027	0.021807	5.896262527	8.981165171	27.77032518	-1.413947584	2.956075311	-0.515674596	0.714409754	0.054956924	0	0.012802881
1264	Flood Summer	Summer	Flood	340	3187.72803	0	0	0	0	3.18772803	0	-86.98	30.47539987	7.26373505	5.85678494	28.84474993	1.91821449	0.09950869	125.3455296	6090.792426	0.08988224	5.890892506	6.891264916	27.8658247	-1.372842544	1.034479976	-0.978925231	0.714222744	0.054939426	0	0.053406966
1265	Flood Summer	Summer	Flood	341	980.94843	0	0	0	0	0.98094843	0	-86.97	30.47539818	6.34769511	4.12132254	29.6395998	0.72891987	0.08135502	0	6348.207356	0.07134361	5.355739951	5.6426875	27.48875046	-0.991955159	1.52136496	-2.150849342	0.652481496	0.049121	0	0.009849628
1266	Flood Summer	Summer	Flood	342	0	0	0	0	0	0	0	-87.16	30.48432514	4.41551745	1.56505223	30.17697525	0.66969082	0.07110967	0	5693.681269	0.08274498	7.144709945	7.997139931	28.03482485	2.729192495	6.432087701	-2.142150402	0.545581751	0.0441833	0	0.021309607
1267	Flood Summer	Summer	Flood	343	3982.22339	0	0	0	0	3.98222339	0	-87.15	30.48433761	4.32196254	3.7888549	29.86967516	1.77702682	0.08540796	0	5381.620569	0.07610044	13.147825	19.72447491	27.73920012	8.825862463	15.93562001	-2.130475045	0.755577251	0.058881176	0	0.082381504
1268	Flood Summer	Summer	Flood	344	1909.26791	0	0	0	0	1.90926791	0	-87.14	30.48434924	2.38554248	4.45901263	29.57242537	1.9866278	0.02930012	536.8648444	4665.4455	0.0120987	13.14107513	19.97292471	27.93802547	10.75553265	15.51391208	-1.634399896	0.756506756	0.059007625	0	0.055183125
1269	Flood Summer	Summer	Flood	345	3113.61726	0	0	0	0	3.11361726	0	-87.13	30.48436004	0.9500905	6.09218752	29.4196248	2.1947269	0.02976646	1504.139006	4013.832958	0.00747865	14.82754993	23.49412489	27.92977524	13.87745943	17.40193737	-1.489849562	0.760852501	0.059391724	0	0.028442401
1270	Flood Summer	Summer	Flood	346	3200.58853	0	0	0	0	3.20058853	0	-87.12	30.48437001	2.49268252	7.95211494	29.70337486	1.9550527	0.02534788	1446.246178	3504.995156	0.0135123	14.19830012	23.33292484	28.0484252	11.7056176	15.3808099	-1.654949662	0.76355575	0.059666375	0	0.088704872
1271	Flood Summer	Summer	Flood	347	6016.22342	4	1	0	1	6.01622342	0.166217231	-87.11	30.48437914	4.98725509	9.43397236	29.92697477	1.8021653	0.01726238	446.3365939	3225.378478	0.02948311	12.98579979	22.06879997	28.10262489	7.998544699	12.63482761	-1.824349877	0.765913501	0.05990385	1	0.067210935
1272	Flood Summer	Summer	Flood	348	1954.62177	0	0	0	0	1.95462177	0	-87.1	30.48438744	4.32265255	6.20257497	29.05097484	0.87588178	0.09418517	0	3195.092881	0.06713877	9.329622388	10.61252499	26.58652496	5.006969838	4.409950016	-2.464449877	0.617043994	0.045686174	0	0.015081011
1273	Flood Summer	Summer	Flood	349	690.03184	0	0	0	0	0.69003184	0	-87.06	30.48441232	4.04623997	2.806445	29.14795017	0.49869302	0.09555025	0	4764.91055	0.10343394	6.92561996	3.15440011	25.64579964	2.87937999	0.34795511	-3.502150533	0.529324509	0.037299976	0	0.05044275
1274	Flood Summer	Summer	Flood	350	847.25872	0	0	0	0	0.84725872	0	-87.05	30.48441646	5.77794743	2.92296749	30.0055747	1.96123489	0.03968037	260.3021604	5445.186336	0.03521869	8.205580235	12.04159975	27.42054939	2.427632805	9.118632261	-2.585025307	0.715145499	0.055017674	0	0.12774052
1275	Flood Summer	Summer	Flood	351	1421.23286	0	0	0	0	1.42123286	0	-87.04	30.48441977	5.89244497	2.92258751	29.8972249	2.08527371	0.00998551	1183.579056	5434.089612	0.00472079	8.035440063	11.91757984	27.44086037	2.142995094	8.994992332	-2.456364533	0.714998603	0.055005099	0	0.044674944
1276	Flood Summer	Summer	Flood	352	2822.77363	0	0	0	0	2.82277363	0	-87.03	30.48442224	6.11565745	3.27739	29.64317512	1.9494632	0.01589338	1263.748191	5292.454511	0.00585715	7.658842444	11.48042488	27.49377537	1.543184994	8.203034881	-2.149399752	0.714377999	0.054946425	0	0.024394045
1277	Flood Summer	Summer	Flood	353	0	0	0	0	0	0	0	-87.02	30.48442389	6.44152499	3.980685	29.25165033	1.8313973	0.0088117	860.7055034	5039.922519	0.00593512	7.186414838	10.86405015	27.56429958	0.744889848	6.88336515	-1.687350747	0.713895738	0.05490105	0	0.025040546
1278	Flood Summer	Summer	Flood	354	2964.69122	0	0	0	0	2.96469122	0	-87	30.4844247	6.81573761	4.82528496	28.79187488	1.98670752	0.07366084	393.3138288	4975.278182	0.07037526	6.689605117	9.998637438	27.64897537	-0.126132493	5.173352478	-1.142899508	0.713802502	0.054894051	0	0.027489425
1279	Flood Summer	Summer	Flood	355	3864.34981	0	0	0	0	3.86434981	0	-86.99	30.48442467	7.13237762	5.52065491	28.44200039	1.37335983	0.13908164	0	4978.975636	0.10568873	6.341122389	8.68050003	27.74032497	-0.791255231	3.159845121	-0.701675416	0.713872746	0.054902801	0	0.011673179
1280	Flood Summer	Summer	Flood	356	90.09128	0	0	0	0	0.09009128	0	-86.98	30.48442382	5.50094235	2.58904997	27.65162516	0.43111494	0.05373053	0	5112.519864	0.08479622	6.093090057	5.730817497	27.40234995	0.592147707	3.141767527	-0.249275211	0.652370244	0.049108874	0	0.003701477
1281	Flood Summer	Summer	Flood	357	2934.08677	0	0	0	0	2.93408677	0	-87.15	30.49336151	6.36748004	2.89903299	29.89872503	1.48539889	0.1270432	0	4777.119414	0.07702799	9.236325264	13.47240019	28.0312748	2.868845224	10.5733672	-1.867450234	0.749815002	0.058504925	0	0.113547643
1282	Flood Summer	Summer	Flood	358	3044.01051	1	0	0	1	3.04401051	0.328513977	-87.14	30.49337315	3.529475	4.5629425	29.40845013	1.8188621	0.01977066	487.0605843	3971.084445	0.01408811	9.54929018	13.95512509	28.15482521	6.01981518	9.392182593	-1.253624919	0.751561746	0.058660151	1	0.024120091
1283	Flood Summer	Summer	Flood	359	0	0	0	0	0	0	0	-87.13	30.49338395	0.45813225	6.1670624	29.23110009	1.9020724	0.01014581	1487.060584	3253.906438	0.00452805	12.71564984	20.11822462	28.27252483	12.25751759	13.95116222	-0.958575256	0.756308243	0.0590549	0	0.086471797
1284	Flood Summer	Summer	Flood	360	97.87889	0	0	0	0	0.09787889	0	-87.12	30.49339392	2.88061747	8.32344759	30.00069999	1.8212206	0.00448836	1446.205827	2622.602644	0.00396113	11.68992519	19.68930006	28.40089989	8.809307724	11.36585247	-1.599800103	0.758929774	0.05930415	0	0.220009972
1285	Flood Summer	Summer	Flood	361	3764.66811	0	0	0	0	3.76466811	0	-87.11	30.49340306	5.61407745	10.14301252	30.7595501	1.78039209	0.03457952	446.2058265	2238.946306	0.04509078	9.908109903	17.6882	28.45232487	4.294032453	7.545187477	-2.307225233	0.761238262	0.059523701	0	0.32289351
1286	Flood Summer	Summer	Flood	362	0	0	0	0	0	0	0	-87.1	30.49341137	4.69626254	6.78188247	29.6121006	0.54635152	0.08772792	0	2195.092881	0.06741689	7.729952574	8.352125168	26.76999998	3.033690034	1.570242698	-2.842100619	0.614708267	0.045497	0	0.007950567
1287	Flood Summer	Summer	Flood	363	2487.41039	0	0	0	0	2.48741039	0	-87.05	30.4934404	5.60661495	1.870765	30.218925	1.39697225	0.10369178	0	4447.681981	0.05167258	7.583460093	8.423949957	26.88812494	1.976845143	6.553184957	-3.330800057	0.651250258	0.048923351	0	0.077989118
1288	Flood Summer	Summer	Flood	364	4258.19635	0	0	0	0	4.25819635	0	-87.04	30.4934437	5.64503753	1.74306002	30.1791749	2.2822092	0.02597041	666.7494724	4434.089612	0.01121068	7.859954953	11.03434992	27.49552488	2.214917423	9.291289898	-2.683650017	0.712379754	0.054745126	0	0.153350995
1289	Flood Summer	Summer	Flood	365	1004.46904	0	0	0	0	1.00446904	0	-87.03	30.49344618	5.8250699	2.10598746	29.97060013	1.9226765	0.0393173	561.97932	4365.720832	0.02482989	7.66839993	10.83144999	27.52134991	1.84333003	8.725462525	-2.449250223	0.712454751	0.05475445	0	0.081877101
1290	Flood Summer	Summer	Flood	366	3583.98547	0	0	0	0	3.58398547	0	-87.02	30.49344782	6.1649425	3.03523993	29.57439995	1.34022647	0.06574277	0	4055.892335	0.03484399	7.352854967	10.41619992	27.56844997	1.187912467	7.380959993	-2.005949976	0.712548494	0.054765849	0	0.04798016
1291	Flood Summer	Summer	Flood	367	943.51653	0	0	0	0	0.94351653	0	-87	30.49344863	5.78359258	2.90505004	28.203825	0.75212673	0.06252789	0	3975.278182	0.04336097	6.684042573	7.666912496	27.25942516	0.900449993	4.761862456	-0.944399837	0.651712507	0.049040426	0	0.007304371
1292	Flood Summer	Summer	Flood	368	369.01024	0	0	0	0	0.36901024	0	-87.15	30.50238541	7.54795003	4.97266996	29.27517462	2.16068709	0.08110946	278.3909119	3971.621345	0.06836243	7.464577436	11.55560017	28.07850027	-0.083372594	6.582930206	-1.196674349	0.744734749	0.058141875	0	0.186435302
1293	Flood Summer	Summer	Flood	369	2357.27349	0	0	0	0	2.35727349	0	-87.14	30.50239705	6.97311235	6.13162756	29.0717001	2.1628601	0.03162134	886.6384851	3403.570473	0.00913332	6.472447634	9.333655119	28.16415024	-0.500664716	3.202027559	-0.907549862	0.746596754	0.058302125	0	0.119265708
1294	Flood Summer	Summer	Flood	370	3131.34595	0	0	0	0	3.13134595	0	-87.13	30.50240785	4.21159756	6.92242503	28.99810028	1.8764105	0.00992257	1661.399703	2564.601996	0.00558066	8.331632495	13.063375	28.36602545	4.120034935	6.140949966	-0.632074832	0.751499996	0.058696725	0	0.021435204
1295	Flood Summer	Summer	Flood	371	3085.95702	0	0	0	0	3.08595702	0	-87.12	30.50241783	5.43943751	8.37787259	29.77187538	1.80355499	0.0009836	1455.205762	1841.943738	0.00099906	7.488360167	13.3526001	28.53279972	2.048922657	4.974727508	-1.239075659	0.754260257	0.05894185	0	0.071164932
1296	Flood Summer	Summer	Flood	372	5748.22567	0	0	0	0	5.74822567	0	-87.11	30.50242697	7.09487748	10.0252502	31.0104003	1.8163346	0.01437058	455.4059493	1273.850383	0.02617169	6.372435093	12.48804975	28.60792494	-0.722442387	2.462799546	-2.402475362	0.756579503	0.059148849	0	0.174663671
1297	Flood Summer	Summer	Flood	373	0	0	0	0	0	0	0	-87.1	30.50243528	5.26205003	6.90406495	29.95412493	0.80083265	0.11913275	0	1195.092881	0.08610366	5.963302493	8.919574976	27.74407434	0.701252463	2.015510026	-2.210050585	0.684728757	0.05225485	0	0.008368134
1298	Flood Summer	Summer	Flood	374	217.80405	0	0	0	0	0.21780405	0	-87.05	30.50246432	4.92089498	1.64403148	30.02235031	0.72702964	0.11853402	0	3451.622195	0.09009306	7.064757586	5.227974892	26.34660006	2.143862606	3.583943412	-3.675750254	0.588600501	0.042957826	0	0.027933794
1299	Flood Summer	Summer	Flood	375	2225.6832	0	0	0	0	2.2256832	0	-87.04	30.50246763	5.43466234	0.75929724	30.41160011	2.3872287	0.03450679	514.7820268	3434.089612	0.03188351	7.707054973	10.40594983	27.53797531	2.272392633	9.646652591	-2.873624799	0.710346237	0.054541649	0	0.194919506
1300	Flood Summer	Summer	Flood	376	3725.55887	6	2	1	1	3.72555887	0.268416105	-87.03	30.5024701	5.51622999	0.88898598	30.31672478	1.50069382	0.10584129	0	3479.793387	0.07199086	7.614544988	10.3132	27.55009985	2.098314998	9.424214017	-2.76662493	0.710519239	0.054559999	1	0.016641246
1301	Flood Summer	Summer	Flood	377	0	0	0	0	0	0	0	-87.16	30.51139681	2.72292499	2.81633622	29.16927481	0.74548452	0.10889756	0	2736.652544	0.07946597	5.528465033	6.068560064	28.18537426	2.805540043	3.252223844	-0.98390055	0.54214374	0.043629276	0	0.007694966
1302	Flood Summer	Summer	Flood	378	1745.41824	0	0	0	0	1.74541824	0	-87.15	30.51140929	2.52963331	4.10759997	28.84464979	2.35370829	0.04057861	419.8144241	3056.482682	0.03030566	8.029330134	14.64812469	28.11385012	5.499696824	10.54052472	-0.730799673	0.740114987	0.057812176	0	0.017435119
1303	Flood Summer	Summer	Flood	379	2873.25876	0	0	0	0	2.87325876	0	-87.14	30.51142093	4.29803002	5.37017	28.77554989	2.2516323	0.02628025	1381.759797	3043.932911	0.00523258	8.636715055	15.57805014	28.13277483	4.338685035	10.20788014	-0.64277506	0.742060497	0.057979176	0	0.008157944
1304	Flood Summer	Summer	Flood	380	130.54191	0	0	0	0	0.13054191	0	-87.13	30.51143174	6.34436512	6.86527991	28.67297459	1.8500602	0.01272778	1411.365663	2079.331635	0.01117228	6.159277558	10.31438756	28.31200027	-0.185087562	3.44910765	-0.360974315	0.746969506	0.058363974	0	0.016877037
1305	Flood Summer	Summer	Flood	381	0	0	0	0	0	0	0	-87.12	30.51144172	7.72396505	7.83929491	28.84382534	1.79802229	0.00289349	965.4564066	1171.734784	0.00508157	4.648597479	9.065180063	28.50794983	-3.075367571	1.225885153	-0.335875511	0.75004299	0.058621099	0	0.05371549
1306	Flood Summer	Summer	Flood	382	3166.29603	0	0	0	0	3.16629603	0	-87.11	30.51145086	8.12702739	8.96608519	29.80829954	1.7742994	0.02285062	426.1323341	428.4606405	0.02802446	4.188807666	9.065819979	28.60972452	-3.938219724	0.099734789	-1.198575018	0.752720252	0.058844049	0	0.071025126
1307	Flood Summer	Summer	Flood	383	0	0	0	0	0	0	0	-87.1	30.51145917	5.8636576	6.70820993	29.73932505	0.99591326	0.11155408	0	195.0928814	0.08252997	4.505192518	9.747112274	28.63390017	-1.358465082	3.038902344	-1.105424884	0.754326761	0.058978451	0	0.046202082
1308	Flood Summer	Summer	Flood	384	0	0	0	0	0	0	0	-87.05	30.51148823	4.5187999	2.10135553	29.76442528	0.7405058	0.09085028	0	2458.763217	0.05889923	6.656622648	2.506175041	25.81657505	2.137822748	0.404819511	-3.94785023	0.527455501	0.037157475	0	0.072724422
1309	Flood Summer	Summer	Flood	385	1904.02228	0	0	0	0	1.90402228	0	-87.04	30.51149154	5.39058256	0.42214525	30.46309996	2.14959588	0.04683969	298.9952598	2434.089612	0.0355434	7.542165041	9.868842602	27.57802486	2.151582481	9.446697352	-2.885075096	0.708478496	0.05435375	0	0.146648964
1310	Flood Summer	Summer	Flood	386	3516.62464	0	0	0	0	3.51662464	0	-87.03	30.51149401	5.43116999	0.470178	30.41969967	1.99504292	0.05902425	240.7860519	2520.041361	0.05772964	7.492667556	9.77218008	27.58685017	2.061497566	9.30200208	-2.832849504	0.708282754	0.0543343	0	0.103583754
1311	Flood Summer	Summer	Flood	387	0	0	0	0	0	0	0	-87.02	30.51149566	5.49332249	0.62389125	30.35445023	1.08932068	0.05059304	0	2132.873627	0.0319268	7.404950023	9.540750027	27.60582542	1.911627533	8.916858777	-2.748624806	0.707450002	0.05425015	0	0.04464392
1312	Flood Summer	Summer	Flood	388	929.14779	0	0	0	0	0.92914779	0	-87.17	30.52040736	2.23543751	1.00625375	29.17802525	1.31771087	0.08239937	0	1610.665794	0.0291903	4.423092544	7.115832567	28.3051753	2.187655034	6.109578817	-0.872849946	0.60459625	0.04797885	0	0.024020798
1313	Flood Summer	Summer	Flood	389	1005.05279	0	0	0	0	1.00505279	0	-87.16	30.52042067	0	2.15338499	28.42672491	1.66264386	0.10713677	0	1759.66268	0.07620632	5.816564918	12.99119997	28.29770041	5.816564918	10.83781498	-0.129024505	0.734368756	0.057370249	0	0.009930218
1314	Flood Summer	Summer	Flood	390	2548.31005	0	0	0	0	2.54831005	0	-87.15	30.52043316	0	2.72260249	28.56287479	2.0767407	0.02997272	438.2667795	2209.487723	0.01300076	7.570485115	14.68397522	28.21709967	7.570485115	11.96137273	-0.345775123	0.736337245	0.057556801	0	0.0145257
1315	Flood Summer	Summer	Flood	391	1489.72258	0	0	0	0	1.48972258	0	-87.14	30.5204448	1.52561524	4.2802276	28.62347507	2.1373935	0.02038935	800.2845464	2935.097305	0.01018509	7.428527474	12.72184968	28.21485043	5.902912234	8.44162208	-0.408624644	0.738666996	0.057752526	0	0.014497136
1316	Flood Summer	Summer	Flood	392	4081.66167	0	0	0	0	4.08166167	0	-87.13	30.52045562	7.8493526	6.90106511	28.62924957	1.8171825	0.02233311	463.0496967	1970.953759	0.01970622	6.331900024	10.71956196	28.28803978	-1.517452576	3.818496848	-0.34120979	0.743243802	0.058100601	0	0.049173937
1317	Flood Summer	Summer	Flood	393	3025.08998	0	0	0	0	3.02508998	0	-87.12	30.5204656	8.98155475	7.84602237	28.74634981	1.57783915	0.06408562	96.81614628	970.9537592	0.04794003	4.399802446	8.185727358	28.45970011	-4.581752304	0.339704988	-0.286649702	0.747350752	0.0584243	0	0.040564161
1318	Flood Summer	Summer	Flood	394	2346.64207	0	0	0	0	2.34664207	0	-87.11	30.52047475	7.80104518	7.93241	29.33864975	1.12285441	0.09188703	0	0	0.06960372	4.526657522	6.186814927	27.77370024	-3.274387658	-1.745595073	-1.564949513	0.679379255	0.0518529	0	0.003021787
1319	Flood Summer	Summer	Flood	395	0	0	0	0	0	0	0	-87.1	30.52048306	3.95566506	4.08053744	29.22942495	0.32061127	0.03265008	0	0	0.03727819	5.730005026	2.235401213	26.14925051	1.774339966	-1.845136227	-3.080174443	0.538286254	0.038281	0	0.013226398
1320	Flood Summer	Summer	Flood	396	0	0	0	0	0	0	0	-87.05	30.52051212	4.46751738	2.9278775	29.47267484	0.35775079	0.03884092	0	1475.580337	0.03208916	6.574522495	2.380621449	25.89109993	2.107005115	-0.547256051	-3.58157491	0.527035996	0.037137225	0	0.030591116
1321	Flood Summer	Summer	Flood	397	3184.02776	0	0	0	0	3.18402776	0	-87.04	30.52051543	5.47622752	0.56175326	30.37527513	1.66588656	0.0985498	0	1434.089612	0.06732925	7.398064971	9.46250248	27.610425	1.921837451	8.90074922	-2.764850135	0.70697251	0.054201675	0	0.044709411
1322	Flood Summer	Summer	Flood	398	1892.96054	0	0	0	0	1.89296054	0	-87.03	30.52051791	5.53205765	0.69619301	30.31729984	1.8654331	0.02061508	754.8886372	1575.57267	0.01500509	7.339890003	9.321775198	27.62244987	1.807832353	8.625582188	-2.694849965	0.706451997	0.0541489	0	0.048876629
1323	Flood Summer	Summer	Flood	399	1532.92314	0	0	0	0	1.53292314	0	-87.02	30.52051956	5.61845017	0.94011375	30.22914981	1.17207942	0.06316427	0	1264.354992	0.04138695	7.286520004	9.190202713	27.63395023	1.668069834	8.250088963	-2.595199577	0.705846757	0.05408725	0	0.026476911
1324	Flood Summer	Summer	Flood	400	3031.07888	0	0	0	0	3.03107888	0	-87.18	30.52941705	0	1.2176525	28.17597532	0.97225022	0.02146013	0	611.4659362	0.01725917	2.599510014	8.212867618	28.47197485	2.599510014	6.995215118	0.29599953	0.733043239	0.057127875	0	0.025141928
1325	Flood Summer	Summer	Flood	401	3936.56495	0	0	0	0	3.93656495	0	-87.17	30.5294312	0	1.2892575	28.1628499	1.7135203	0.05331581	296.0170142	610.6657937	0.01768669	3.01195246	9.104747295	28.45107508	3.01195246	7.815489795	0.288225177	0.732391998	0.05717175	0	0.019334041
1326	Flood Summer	Summer	Flood	402	3179.38997	0	0	0	0	3.17938997	0	-87.16	30.52944452	0	1.71415249	28.25292492	2.24654389	0.01985505	689.1253992	820.5732604	0.01115619	4.364500046	10.65672231	28.41169977	4.364500046	8.942569817	0.158774852	0.732482255	0.05726485	0	0.014138345
1327	Flood Summer	Summer	Flood	403	4338.28112	0	0	0	0	4.33828112	0	-87.15	30.52945701	0.07472625	2.8232075	28.50604963	2.2770806	0.01189641	1161.853217	1548.92696	0.00687571	5.799242377	11.06863761	28.38269997	5.724516127	8.24543011	-0.123349664	0.733590752	0.057392649	0	0.009518081
1328	Flood Summer	Summer	Flood	404	5867.43459	0	0	0	0	5.86743459	0	-87.14	30.52946866	3.3738201	4.75513256	28.73885011	1.88528493	0.05841097	234.5269366	2470.467511	0.03938483	5.437364936	8.291712403	28.38552475	2.063544836	3.536579843	-0.35332536	0.735552758	0.057556274	0	0.055577446
1329	Flood Summer	Summer	Flood	405	5197.49899	0	0	0	0	5.19749899	0	-87.13	30.52947948	6.97292256	8.03116739	28.85687494	1.01568629	0.07181885	0	1986.888506	0.05936655	5.144965053	5.079027776	27.61512566	-1.827957507	-2.952139614	-1.241749284	0.672488995	0.051329024	0	0.009846744
1330	Flood Summer	Summer	Flood	406	0	0	0	0	0	0	0	-87.12	30.52948947	6.29329002	7.99064755	29.12682533	0.7066454	0.038268	0	997.5273958	0.03655576	5.194452524	3.653415076	26.94194984	-1.098837496	-4.337232474	-2.184875486	0.606622256	0.044908275	0	0.005024241
1331	Flood Summer	Summer	Flood	407	1081.76012	0	0	0	0	1.08176012	0	-87.04	30.52953932	5.30500758	1.46266447	29.92430019	1.03069872	0.09888386	0	434.0896123	0.06877635	7.267389965	9.10406189	27.64001999	1.962382385	7.64139742	-2.284280201	0.705380404	0.05403984	0	0.011168243
1332	Flood Summer	Summer	Flood	408	2295.15081	0	0	0	0	2.29515081	0	-87.03	30.5295418	5.67304504	1.07005648	30.17444992	1.7870096	0.01941158	550.3956018	780.5780402	0.01845433	7.241832495	9.044892311	27.64527512	1.568787455	7.974835831	-2.529174804	0.705124497	0.0540138	0	0.031510443
1333	Flood Summer	Summer	Flood	409	3328.22473	0	0	0	0	3.32822473	0	-87.02	30.52954344	5.76486504	1.34207499	30.08272457	1.66193046	0.04578405	57.24270815	728.8680426	0.04764775	7.20480752	8.959112644	27.65317488	1.43994248	7.617037654	-2.429549693	0.704648986	0.053965075	0	0.028991387
1334	Flood Summer	Summer	Flood	410	0	0	0	0	0	0	0	-87	30.52954425	5.847435	1.58939499	30.00109959	0.86080215	0.03181314	0	0	0.01834975	7.175360203	8.888689995	27.65969944	1.327925203	7.299295005	-2.34140015	0.70420149	0.053919151	0	0.009733448
1335	Flood Summer	Summer	Flood	411	0	0	0	0	0	0	0	-87.19	30.53842588	3.38405252	0.49699751	29.37417555	0.80636346	0.00933433	0	625.5706309	0.00283078	4.171724916	4.615167499	28.31967497	0.787672396	4.118169989	-1.054500581	0.541041754	0.042698599	0	0.026440499
1336	Flood Summer	Summer	Flood	412	257.34112	0	0	0	0	0.25734112	0	-87.18	30.53844088	0	1.16946501	28.17239999	0.89302474	0.01850201	0	0	0.00848882	2.132869959	7.362917423	28.50094986	2.132869959	6.193452413	0.32854987	0.732917249	0.057106025	0	0.039963152
1337	Flood Summer	Summer	Flood	413	1586.48935	0	0	0	0	1.58648935	0	-87.17	30.53845504	0.05544825	1.67728755	28.39779997	1.12059672	0.05906925	0	0	0.03620871	1.328275755	6.102669954	28.55684996	1.272827505	4.425382404	0.159049987	0.730144754	0.057106576	0	0.032726083
1338	Flood Summer	Summer	Flood	414	2829.69967	0	0	0	0	2.82969967	0	-87.16	30.53846836	0	1.87068999	28.33294964	1.95565417	0.05524696	307.7128062	352.0174972	0.04407316	2.328312516	7.012889981	28.56635046	2.328312516	5.142199991	0.23340082	0.730233997	0.0571632	0	0.026702076
1339	Flood Summer	Summer	Flood	415	751.18146	0	0	0	0	0.75118146	0	-87.15	30.53848085	1.47866252	3.28047252	28.68994999	2.27645681	0.01918903	1091.204234	1347.995689	0.01489976	4.529645085	7.867930055	28.58747482	3.050982565	4.587457535	-0.102475167	0.730912	0.05724675	0	0.02498658
1340	Flood Summer	Summer	Flood	416	3692.18805	0	0	0	0	3.69218805	0	-87.14	30.53849251	4.83322006	5.01911759	29.04040003	1.62486274	0.06892034	301.4197185	2347.182389	0.03092905	5.141240001	7.332239986	28.61102486	0.308019941	2.313122396	-0.429375173	0.732183993	0.057349775	0	0.058793822
1341	Flood Summer	Summer	Flood	417	1769.09061	0	0	0	0	1.76909061	0	-87.13	30.53850333	5.4774524	7.79679752	29.56310081	0.7287803	0.02594685	0	2312.299204	0.01063663	6.237320066	0.140130002	25.43195057	0.759867666	-7.656667518	-4.131150241	0.467113495	0.0314777	0	0.304721302
1342	Flood Summer	Summer	Flood	418	5823.30515	9	2	0	3	5.82330515	0.515171354	-87.12	30.53851332	5.64429748	6.61716247	29.92135048	0.47948873	0.0109714	0	1541.521861	0.00340448	6.228385091	0.161089499	25.44909954	0.584087611	-6.456072971	-4.472250939	0.467126504	0.031483825	1	0.094999104
1343	Flood Summer	Summer	Flood	419	0	0	0	0	0	0	0	-87.04	30.53856319	5.39279497	1.47569004	29.73544979	0.81153969	0.05038379	0	0	0.04197034	6.942620039	6.725650258	27.11672497	1.549825069	5.249960218	-2.618724822	0.645086251	0.048337276	0	0.005335246
1344	Flood Summer	Summer	Flood	420	3126.45223	0	0	0	0	3.12645223	0	-87.03	30.53856567	5.79034746	1.4051925	30.05735016	1.31478656	0.05874237	101.3750285	144.5451505	0.02191288	7.171515107	8.859097481	27.66125011	1.381167647	7.453904981	-2.396100046	0.704129994	0.053912225	0	0.014833548
1345	Flood Summer	Summer	Flood	421	4309.50684	0	0	0	0	4.30950684	0	-87.02	30.53856732	5.8962524	1.73157752	29.9533	1.7944478	0.0377091	384.7499488	387.0416651	0.03166475	7.148442388	8.815624952	27.66599989	1.252189988	7.084047432	-2.287300111	0.703760505	0.053874001	0	0.01796772
1346	Flood Summer	Summer	Flood	422	140.67014	0	0	0	0	0.14067014	0	-87	30.53856813	5.99475753	2.04070255	29.85722494	1.11585633	0.07068508	0	0	0.05919714	7.130049944	8.786777496	27.6697998	1.135292414	6.746074946	-2.187425135	0.703392237	0.0538357	0	0.004607989
1347	Flood Summer	Summer	Flood	423	0	0	0	0	0	0	0	-87.19	30.5474497	4.51852513	0.23754601	29.72334957	0.64810119	0.00723311	0	622.1056912	0.00347483	4.758080006	3.610413313	28.27186648	0.239554876	3.372867303	-1.45148309	0.47703133	0.037773268	0	0.024865707
1348	Flood Summer	Summer	Flood	424	0	0	0	0	0	0	0	-87.18	30.54746469	2.62050676	1.62199704	29.07076645	0.6390625	0.00980529	0	0	0.00468024	4.759570122	3.606920004	28.2689991	2.139063362	1.984922964	-0.80176735	0.476987004	0.0378174	0	0.027808585
1349	Flood Summer	Summer	Flood	425	0	0	0	0	0	0	0	-87.17	30.54747886	1.96557853	3.13028258	29.13625049	0.83357388	0.03531256	0	0	0.02034543	0.754812509	4.056209981	28.62117529	-1.210766021	0.925927401	-0.515075201	0.727553234	0.057063825	0	0.028218225
1350	Flood Summer	Summer	Flood	426	3612.16047	7	1	0	1	3.61216047	0.276842629	-87.16	30.54749219	3.22977996	3.50792753	29.17050028	1.8748807	0.0622424	290.6640473	346.0863948	0.02767754	1.918577552	4.450305104	28.65945005	-1.311202408	0.942377574	-0.511050226	0.727751985	0.057092175	1	0.01677189
1351	Flood Summer	Summer	Flood	427	712.30255	0	0	0	0	0.71230255	0	-87.15	30.54750468	5.21578002	3.99678749	29.04467488	2.2067698	0.0590764	240.5389449	1346.086395	0.0696055	4.431420028	5.322570086	28.73762465	-0.784359992	1.325782596	-0.307050235	0.728586748	0.0571485	0	0.076184799
1352	Flood Summer	Summer	Flood	428	2830.76062	0	0	0	0	2.83076062	0	-87.14	30.54751635	6.98764241	5.01405764	29.14287519	1.01865336	0.05680505	0	1441.88681	0.0610716	6.108124971	5.997699976	28.79979992	-0.879517439	0.983642336	-0.343075271	0.730022743	0.057233349	0	0.009308521
1353	Flood Summer	Summer	Flood	429	2198.50739	0	0	0	0	2.19850739	0	-87.12	30.54753716	5.40936243	2.83553597	28.2552495	0.43051742	0.01095625	0	2322.362278	0.0053179	5.799985051	1.166112717	26.2715497	0.390622621	-1.669423253	-1.983699798	0.467636496	0.031714225	0	0.08105779
1354	Flood Summer	Summer	Flood	430	0	0	0	0	0	0	0	-87.11	30.54754632	5.36933756	3.14015198	28.34839964	0.35121556	0.00232561	0	2048.968166	0.00100656	5.881649852	0.974521518	26.11477518	0.512312292	-2.165630462	-2.233624459	0.467554502	0.031677825	0	0.07706766
1355	Flood Summer	Summer	Flood	431	3810.61554	0	0	0	0	3.81061554	0	-87.02	30.54759118	5.27994502	1.750232	29.20057488	1.32556271	0.10761178	0	0	0.07902304	6.892905116	6.626279466	27.12547541	1.612960096	4.876047466	-2.075099473	0.644218497	0.048252325	0	0.005638917
1356	Flood Summer	Summer	Flood	432	3220.85902	0	0	0	0	3.22085902	0	-87	30.54759199	6.13853515	2.50730997	29.71884918	1.27592437	0.07838553	0	0	0.05369065	7.116847396	8.779402494	27.6723752	0.978312246	6.272092524	-2.046473978	0.702991501	0.053793726	0	0.004114247
1357	Flood Summer	Summer	Flood	433	1164.58759	0	0	0	0	1.16458759	0	-87.17	30.55650267	5.39515996	3.66180003	29.42242527	0.8612799	0.04823881	0	0	0.02773219	0.824830514	3.067517519	28.60282516	-4.570329447	-0.594282511	-0.819600105	0.725315735	0.05702985	0	0.015601883
1358	Flood Summer	Summer	Flood	434	4747.26786	0	0	0	0	4.74726786	0	-87.16	30.556516	6.55504239	3.77183747	29.28187513	1.86191141	0.04453753	377.350942	504.0807529	0.02107017	1.778012514	3.135607541	28.62855005	-4.777029876	-0.636229929	-0.653325077	0.725478977	0.05704445	0	0.066492454
1359	Flood Summer	Summer	Flood	435	4163.69035	0	0	0	0	4.16369035	0	-87.15	30.5565285	7.3931675	3.82420248	29.01097489	1.9333963	0.07301298	153.0574205	476.9418031	0.06211742	3.425877452	3.609892488	28.69739962	-3.967290048	-0.214309993	-0.313575274	0.726204008	0.057076075	0	0.046195086
1360	Flood Summer	Summer	Flood	436	167.58363	0	0	0	0	0.16758363	0	-87.14	30.55654017	5.18993247	1.7471475	27.0864749	0.71794555	0.03758109	0	441.8868102	0.02671141	4.76068753	3.012064993	27.90517473	-0.42924494	1.264917493	0.818699832	0.53283675	0.038331949	0	0.019369512
1361	Flood Summer	Summer	Flood	437	528.64085	0	0	0	0	0.52864085	0	-87.02	30.55661503	3.20375258	0.73115253	27.59179973	0.73935599	0.06657571	0	0	0.05711554	6.436977506	2.350208074	26.03044987	3.233224926	1.619055544	-1.561349863	0.526193008	0.03712335	0	0.053115056
1362	Flood Summer	Summer	Flood	438	6379.72606	0	0	0	0	6.37972606	0	-87	30.55661584	6.27053249	2.94621253	29.592175	1.58777031	0.1368095	0	0	0.08741335	7.119074941	8.822714806	27.67124987	0.848542451	5.876502276	-1.920925134	0.702742502	0.053766825	0	0.002411719
1363	Flood Summer	Summer	Flood	439	0	0	0	0	0	0	0	-86.99	30.55661582	6.39042997	3.35105991	29.47719955	0.60710245	0.02410395	0	0	0.04360077	7.122364998	8.841364861	27.67035007	0.731935028	5.490304951	-1.806849475	0.7027165	0.05376385	0	0.000740431
1364	Flood Summer	Summer	Flood	440	0	0	0	0	0	0	0	-87.18	30.56551229	2.76912248	2.83024747	29.33022451	0.61149845	0.02068515	0	0	0.0188871	1.883217707	2.748322547	28.5152998	-0.885904773	-0.081924924	-0.814924713	0.659646772	0.051125301	0	0.008954817
1365	Flood Summer	Summer	Flood	441	3568.86151	0	0	0	0	3.56886151	0	-87.17	30.56552646	5.33840001	3.05343497	29.27347469	1.09250521	0.04876805	0	0	0.02552032	1.002172515	2.444832504	28.55662489	-4.336227495	-0.608602466	-0.716849801	0.723004252	0.057010475	0	0.017719947
1366	Flood Summer	Summer	Flood	442	555.04421	0	0	0	0	0.55504421	0	-87.16	30.5655398	6.91153753	2.71096247	28.77782488	1.7460715	0.03347104	709.0403299	547.424998	0.01679915	1.334015012	2.416072488	28.53732491	-5.577522518	-0.294889982	-0.240499975	0.72330524	0.0570169	0	0.035548804
1367	Flood Summer	Summer	Flood	443	5278.47338	0	0	0	0	5.27847338	0	-87.15	30.56555231	7.10884988	2.51707995	28.27517462	1.66279036	0.08543337	0	0	0.06348071	2.082109988	2.650714994	28.57315063	-5.026739892	0.133635044	0.297976015	0.723912001	0.057032025	0	0.037996658
1368	Flood Summer	Summer	Flood	444	0	0	0	0	0	0	0	-87.14	30.56556398	5.39270997	1.54451251	27.05194998	0.51223775	0.0396739	0	0	0.02015219	5.118567467	2.764710009	27.57977486	-0.274142503	1.220197499	0.527824877	0.468599752	0.032144925	0	0.01612131
1369	Flood Summer	Summer	Flood	445	3789.8246	0	0	0	0	3.7898246	0	-87	30.56563968	5.80468511	2.58197274	28.96607494	1.56396074	0.05048988	0	0	0.04953785	6.902130008	6.705063578	27.1175251	1.097444898	4.123090838	-1.848549839	0.643835247	0.048215575	0	0.004008916
1370	Flood Summer	Summer	Flood	446	3861.98383	0	0	0	0	3.86198383	0	-86.99	30.56563965	6.21371245	2.88919002	28.96850014	1.31090868	0.08337757	0	0	0.07558479	7.138142467	8.921290159	27.66617489	0.924430017	6.032100139	-1.302325251	0.702654257	0.053756099	0	0.001569265
1371	Flood Summer	Summer	Flood	447	0	0	0	0	0	0	0	-86.98	30.56563879	5.61961257	1.31140497	27.49557495	0.79100133	0.02700006	0	0	0.01571976	6.183047652	3.002450049	26.52975035	0.563435082	1.691045079	-0.965824603	0.526303247	0.037206074	0	0.00466762
1372	Flood Summer	Summer	Flood	448	0	0	0	0	0	0	0	-87.18	30.57453607	4.05319	2.24271072	28.88419962	0.71496007	0.03616013	0	0	0.04846115	1.892244533	2.754395008	28.53697491	-2.160945467	0.511684288	-0.347224713	0.659358755	0.05118655	0	0.005105163
1373	Flood Summer	Summer	Flood	449	2939.94968	0	0	0	0	2.93994968	0	-87.17	30.57455025	4.99113989	2.85914999	29.40964985	1.09589749	0.06839504	0	0	0.06795148	0.99025102	2.284922421	28.53867483	-4.00088887	-0.574227569	-0.870975019	0.721265003	0.05700145	0	0.004195186
1374	Flood Summer	Summer	Flood	450	3200.69041	0	0	0	0	3.20069041	0	-87.16	30.57456359	6.40774751	2.54863251	29.02530002	1.2521083	0.06120977	0	58.46687648	0.03994198	1.148842484	2.210792482	28.51014996	-5.258905026	-0.337840028	-0.515150064	0.720855758	0.057002501	0	0.015974948
1375	Flood Summer	Summer	Flood	451	359.2346	0	0	0	0	0.3592346	0	-87.15	30.5745761	6.37266993	1.62475002	27.70475006	0.73027898	0.07838503	0	0	0.05359157	4.177057624	2.702404976	27.85907507	-2.195612306	1.077654956	0.154325009	0.532282248	0.0384991	0	0.004957321
1376	Flood Summer	Summer	Flood	452	0	0	0	0	0	0	0	-87.02	30.57466269	4.92803252	1.18382247	27.9685502	1.5449353	0.03427106	0	0	0.0120877	6.218137622	0.185121998	25.46872473	1.290105102	-0.998700472	-2.499825472	0.467353009	0.03159445	0	0.300196342
1377	Flood Summer	Summer	Flood	453	5744.68033	0	0	0	0	5.74468033	0	-87	30.5746635	5.88178492	2.74198077	28.92809963	1.7529606	0.01731708	0	0	0.01299817	6.921564937	6.794503592	27.11205006	1.039780017	4.052522822	-1.816049574	0.643831998	0.048214424	0	0.007214254
1378	Flood Summer	Summer	Flood	454	4012.18452	0	0	0	0	4.01218452	0	-86.99	30.57466348	6.43732989	3.512375	29.43229961	1.5009292	0.03462956	0	0	0.00825501	7.150927544	8.980164766	27.6628499	0.713597654	5.467789766	-1.769449707	0.702656999	0.053755474	0	0.003311577
1379	Flood Summer	Summer	Flood	455	0	0	0	0	0	0	0	-86.98	30.57466262	5.92367506	1.82785752	27.9944005	1.00142491	0.02268427	0	0	0.00985815	6.505815029	4.995382488	26.9074254	0.582139969	3.167524968	-1.086975096	0.585088	0.042722549	0	0.002458002
1380	Flood Summer	Summer	Flood	456	3974.30972	0	0	0	0	3.97430972	0	-87.02	30.5836865	6.08784509	2.75497352	28.96552515	1.68966614	0.04879693	0	0	0.05240715	6.45717752	2.404244363	26.01394987	0.36933243	-0.350729157	-2.951575279	0.52620025	0.0371433	0	0.010617143
1381	Flood Summer	Summer	Flood	457	862.12815	0	0	0	0	0.86212815	0	-87	30.58368731	6.26521492	1.74682248	28.03189993	1.28220792	0.052103	0	0	0.03961913	6.515347362	5.040654898	26.90477514	0.250132442	3.293832418	-1.127124787	0.585095003	0.042722575	0	0.001735072
1382	Flood Summer	Summer	Flood	458	0	0	0	0	0	0	0	-87.03	30.59270865	6.31617749	2.72916403	28.99457502	0.97379853	0.02572729	0	0	0.01958458	6.462170005	2.39943032	26.00597525	0.145992515	-0.32973371	-2.988599774	0.526234746	0.037160049	0	0.004382917
1383	Flood Summer	Summer	Flood	459	3262.0883	0	0	0	0	3.2620883	0	-87.02	30.5927103	6.41613758	2.93342495	28.96409988	1.5545249	0.08445995	0	0	0.06476661	7.172542453	9.08361721	27.65705013	0.756404873	6.15019226	-1.307049747	0.702673495	0.0537556	0	0.001038284
1384	Flood Summer	Summer	Flood	460	0	0	0	0	0	0	0	-87.03	30.60173243	6.59083335	1.55813599	28.2601668	1.54383388	0.06491644	0	0	0.05766932	6.393860102	2.562033184	26.13764954	-0.196973248	1.003897194	-2.122517264	0.52627825	0.037184751	0	0.007288495
1385	Flood Summer	Summer	Flood	461	0	0	0	0	0	0	0	-87.02	30.60173408	6.47452498	1.68452996	28.05547476	1.7942155	0.01668762	0	0	0.03830843	6.190607548	3.038857549	26.52785015	-0.283917432	1.354327589	-1.527624609	0.526308999	0.037206175	0	0.007986436
1386	Flood Summer	Summer	Flood	462	0	0	0	0	0	0	0	-87.03	30.61075621	6.65369248	1.0163075	27.61667538	1.9319633	0.08007925	0	150.0698426	0.06919837	5.861537576	1.021717519	26.15337467	-0.792154904	0.005410019	-1.463300708	0.467521012	0.03169005	0	0.034020158
1387	Control Spring	Spring	Control	1	5746.51307	14	3	1	1	5.74651307	0.174018572	-87.39	30.31238712	8.20187736	9.27400261	23.59552479	3.92725779	0.41145306	0	0	0.20759191	21.0102005	31.45655012	23.32782459	12.80832314	22.18254751	-0.267700197	0.506795242	0.023124375	1	0.182911167
1388	Control Spring	Spring	Control	2	3604.97186	0	0	0	0	3.60497186	0	-87.38	30.31241769	8.68275261	0	23.05177498	2.06493256	0.21934235	0	628.8088888	0.0879758	21.17519999	31.65327501	23.31684971	12.49244738	31.65327501	0.265074729	0.504297495	0.022952851	0	0.343412211
1389	Control Spring	Spring	Control	3	1685.938	0	0	0	0	1.685938	0	-87.37	30.31244743	7.76897526	6.95929003	23.95604992	1.26757028	0.31511094	0	715.6540366	0.19651646	21.4864502	32.02474928	23.29612494	13.71747494	25.06545925	-0.659924985	0.499729492	0.022639225	0	0.149556697
1390	Control Spring	Spring	Control	4	0	0	0	0	0	0	0	-87.36	30.31247635	6.80742677	28.34273275	24.97973315	1.44294075	0.3886697	0	881.2624882	0.2714456	18.98793348	29.02490044	23.47893333	12.18050671	0.682167686	-1.500799816	0.494292339	0.022266267	0	0.12914366
1391	Control Spring	Spring	Control	5	0	0	0	0	0	0	0	-87.32	30.31258374	6.77137518	34.2555008	24.76522493	2.71178954	0.23919581	71.30990894	1680.319984	0.0869475	15.76545	25.16314983	23.70387554	8.994074821	-9.092350966	-1.061349388	0.515245006	0.023705625	0	0.050879245
1392	Control Spring	Spring	Control	6	0	0	0	0	0	0	0	-87.31	30.31260852	6.72977007	33.65285015	24.99577522	6.2676817	0.64785115	387.2164673	2075.198733	0.32307959	16.29377484	25.79664993	23.66464996	9.564004773	-7.856200217	-1.331125257	0.517444238	0.0238566	0	0.002850467
1393	Control Spring	Spring	Control	7	1380.10103	0	0	0	0	1.38010103	0	-87.39	30.32141109	7.54595005	5.38420999	24.06372452	1.87247754	0.34741351	0	0	0.28843276	14.17250001	20.39367485	23.43402481	6.626549964	15.00946486	-0.629699709	0.59662275	0.040679775	0	0.344191805
1394	Control Spring	Spring	Control	8	4474.45325	3	0	0	1	4.47445325	0.223490993	-87.38	30.32144167	8.43075013	0	23.0468502	3.87228347	0.413536	0	0	0.23707631	21.27112484	31.7677002	23.31050014	12.84037471	31.7677002	0.263649945	0.502845496	0.022853125	1	0.190881823
1395	Control Spring	Spring	Control	9	4900.4186	0	0	0	0	4.9004186	0	-87.37	30.32147142	7.66758239	5.36920005	23.29055023	4.34450769	0.41251513	0	0	0.24626875	18.139395	26.35669303	23.36497498	10.47181261	20.98749298	0.074424746	0.543477252	0.0313419	0	0.811965132
1396	Control Spring	Spring	Control	10	10822.68939	20	5	3	2	10.82268939	0.184796951	-87.36	30.32150035	7.23933005	13.52857005	23.66782427	4.3734973	0.46911507	0	0	0.23698677	22.39384985	33.11012554	23.23512459	15.1545198	19.58155549	-0.432699682	0.487451501	0.021796575	1	0.094199542
1397	Control Spring	Spring	Control	11	8199.40038	0	0	0	0	8.19940038	0	-87.35	30.32152844	7.43338502	21.42539978	24.86494971	3.82331232	0.44160549	0	0	0.22194101	22.99282503	33.8291254	23.19439983	15.55944001	12.40372562	-1.670549876	0.480810501	0.0213412	0	0.438422271
1398	Control Spring	Spring	Control	12	9329.00706	12	3	0	3	9.32900706	0.321577632	-87.34	30.32155572	7.39614999	19.30824995	24.91737509	3.98100991	0.29456519	0	265.7184429	0.20463254	23.21762514	34.10205078	23.17935038	15.82147515	14.79380083	-1.738024714	0.480212495	0.02130055	1	0.095594951
1399	Control Spring	Spring	Control	13	5260.6254	8	3	0	1	5.2606254	0.190091467	-87.33	30.32158216	7.24131664	22.61200015	24.97820028	1.82582267	0.27976602	0	574.5932767	0.22180753	21.25314975	31.74967432	23.31857538	14.01183311	9.13767417	-1.659624898	0.491609745	0.022082925	1	0.061191691
1400	Control Spring	Spring	Control	14	0	0	0	0	0	0	0	-87.32	30.32160778	6.85539507	34.31699943	24.94849968	1.26599861	0.25758276	0	738.5438228	0.2600931	16.7586503	26.35564995	23.63250065	9.903255233	-7.961349482	-1.315999032	0.516546488	0.02379485	0	0.051664791
1401	Control Spring	Spring	Control	15	0	0	0	0	0	0	0	-87.31	30.32163257	6.67208254	33.02502537	25.4145503	7.03440086	0.71491614	43.12889905	1330.331227	0.34533571	18.90627527	28.93225002	23.47717476	12.23419273	-4.092775347	-1.937375541	0.521943763	0.02416475	0	0.013641514
1402	Control Spring	Spring	Control	16	1137.24176	0	0	0	0	1.13724176	0	-87.26	30.32172346	7.98732018	11.07229996	23.08745003	1.72212347	0.41062514	0	1984.310045	0.38183565	23.18305016	34.05970001	23.06159973	15.19572998	22.98740005	-0.025850299	0.78452301	0.042357851	0	0.000983571
1403	Control Spring	Spring	Control	17	407.8919	0	0	0	0	0.4078919	0	-87.25	30.32174411	6.14742343	10.48506673	23.06826655	2.9577687	0.52338924	0	2128.130712	0.34760791	22.7090745	33.59582424	23.12962484	16.56165107	23.11075751	0.061358294	0.811104983	0.044238701	0	0.001148134
1404	Control Spring	Spring	Control	18	1274.34442	0	0	0	0	1.27434442	0	-87.24	30.32176394	5.18348992	9.966115	22.9940753	3.07012573	0.46762284	0	2658.394483	0.23622992	22.10327482	32.98612595	23.24752569	16.9197849	23.02001095	0.253450392	0.823917523	0.0451484	0	0.000446422
1405	Control Spring	Spring	Control	19	1009.21597	0	0	0	0	1.00921597	0	-87.23	30.32178294	4.72083998	9.63865471	22.90474987	1.02383447	0.27916021	0	3406.63795	0.19222157	17.91795015	27.90475082	23.59525013	13.19711017	18.26609611	0.69050026	0.666037023	0.03418435	0	0.001080034
1406	Control Spring	Spring	Control	20	22.60455	0	0	0	0	0.02260455	0	-87.22	30.32180112	5.3005867	17.59274642	23.68606694	1.19648216	0.3112783	0	3613.791833	0.19300014	16.73797488	26.72024965	23.83074999	11.43738818	9.127503233	0.144683049	0.670662507	0.0345025	0	0.003617527
1407	Control Spring	Spring	Control	21	0	0	0	0	0	0	0	-87.36	30.33052433	5.02965748	8.63835764	26.34875059	0.29150274	0.13345232	0	0	0.19835756	7.26098752	7.813324928	23.67732477	2.23133004	-0.825032712	-2.671425818	0.686053515	0.0582468	0	0.003733997
1408	Control Spring	Spring	Control	22	101.98841	0	0	0	0	0.10198841	0	-87.35	30.33055244	5.50855005	11.92159486	26.03192473	0.6236768	0.18551183	0	0	0.20910207	7.257712483	7.537417412	23.70269918	1.749162433	-4.384177448	-2.329225546	0.685598746	0.058233676	0	0.025256057
1409	Control Spring	Spring	Control	23	3141.6312	35	7	2	1	3.1416312	0.318305981	-87.34	30.33057972	6.00239503	15.71856499	26.24792481	2.36687369	0.2981199	0	0	0.17507544	23.34759951	34.25742531	23.17009974	17.34520448	18.53886032	-3.077825075	0.477899246	0.021142025	1	0.123904308
1410	Control Spring	Spring	Control	24	5801.28629	0	0	0	0	5.80128629	0	-87.33	30.33060617	5.8050065	10.59989993	25.96980031	1.89827895	0.25069247	0	0	0.15251146	23.34240007	34.25564957	23.17114973	17.53739357	23.65574964	-2.798650579	0.480743252	0.021337275	0	0.442775424
1411	Control Spring	Spring	Control	25	6624.86647	0	0	0	0	6.62486647	0	-87.32	30.3306318	8.53483725	33.76862526	24.51689959	2.37869485	0.30383649	0	51.81321367	0.29300402	22.71069956	33.50549984	23.2135253	14.17586231	-0.26312542	-1.303374295	0.511650004	0.02345595	0	0.129590242
1412	Control Spring	Spring	Control	26	4365.16159	0	0	0	0	4.36516159	0	-87.31	30.3306566	7.06884003	34.52360058	24.81687451	6.7635025	0.63854294	0	1051.813214	0.33885969	22.34035015	33.04679966	23.22782516	15.27151012	-1.47680092	-1.589049345	0.536256239	0.02514425	0	0.030742097
1413	Control Spring	Spring	Control	27	3511.55863	2	1	0	1	3.51155863	0.28477383	-87.3	30.33068057	7.94500017	18	25	4.47175647	0.5501377	0	1093.998219	0.31635305	23.18700027	34.00984955	23.12839985	15.2420001	16.00984955	-1.871600151	0.595364988	0.029207151	1	0.074422542
1414	Control Spring	Spring	Control	28	4732.7141	0	0	0	0	4.7327141	0	-87.29	30.33070372	8.22632996	13.65153313	24.87093353	5.85337106	0.5524363	0	1067.223322	0.35933739	23.5545667	34.40613302	23.05786705	15.32823674	20.75459989	-1.81306648	0.676620662	0.034817301	0	0.360255649
1415	Control Spring	Spring	Control	29	6735.07618	36	6	0	2	6.73507618	0.29695284	-87.28	30.33072603	8.7121278	13.8501749	23.99485063	7.85520679	0.47607941	0	999.5609919	0.38735204	23.5534749	34.41259956	23.03552532	14.8413471	20.56242466	-0.959325308	0.733687997	0.038784775	1	0.120537643
1416	Control Spring	Spring	Control	30	6985.26511	0	0	0	0	6.98526511	0	-87.26	30.33074752	7.3969475	13.32557488	23.5225749	9.67980638	0.24850554	82.28127713	984.310045	0.25382192	23.31762552	34.17692471	23.04932499	15.92067802	20.85134983	-0.473249911	0.77674301	0.041796824	0	0.093738661
1417	Control Spring	Spring	Control	31	2730.85758	0	0	0	0	2.73085758	0	-87.25	30.33076819	5.87203753	11.27504992	23.31110048	10.20645409	0.15756276	519.4370152	1249.127791	0.1712021	22.86322498	33.72482491	23.11095047	16.99118745	22.44977499	-0.20015001	0.800788254	0.043488625	0	0.001210036
1418	Control Spring	Spring	Control	32	2187.11335	0	0	0	0	2.18711335	0	-87.24	30.33078802	5.00048507	9.93149471	23.06542492	8.55841469	0.32359186	612.2119364	2024.460703	0.21614864	22.22154999	33.07750034	23.23425007	17.22106492	23.14600563	0.168825149	0.814801991	0.044480599	0	9.10E-05
1419	Control Spring	Spring	Control	33	4158.56933	0	0	0	0	4.15856933	0	-87.23	30.33080703	4.62595487	9.53958249	22.93087531	5.2004657	0.34606745	387.4454114	2938.802824	0.13098566	21.25252485	32.08982468	23.45014954	16.62656998	22.55024219	0.519274226	0.823087752	0.045063875	0	4.93E-05
1420	Control Spring	Spring	Control	34	2949.16656	0	0	0	0	2.94916656	0	-87.22	30.33082521	4.51056004	9.71363235	22.97110033	4.58469292	0.20825852	391.4683944	2863.417288	0.12763769	19.70427513	30.54082489	23.77692509	15.19371509	20.82719254	0.805824757	0.828684002	0.045433425	0	8.14E-05
1421	Control Spring	Spring	Control	35	2154.42787	0	0	0	0	2.15442787	0	-87.21	30.33084256	4.58879506	10.2289002	23.15292454	4.53349461	0.14836428	387.3421798	2213.586581	0.09229607	17.67895031	28.56389999	24.16074944	13.09015525	18.33499979	1.007824895	0.837307751	0.045990575	0	0.000453115
1422	Control Spring	Spring	Control	36	3143.60412	0	0	0	0	3.14360412	0	-87.2	30.33085909	4.89322758	10.94304991	23.40569973	3.11782693	0.25191992	98.57591244	1444.458044	0.1321533	15.08049989	26.05767488	24.61474991	10.18727231	15.11462497	1.209050178	0.848652497	0.04669435	0	0.009098511
1423	Control Spring	Spring	Control	37	2654.68742	0	0	0	0	2.65468742	0	-87.19	30.33087478	5.41646755	11.53845	23.59792519	3.23701194	0.29668696	21.43855945	848.9830331	0.17920591	11.99610019	23.09089994	25.13089943	6.579632637	11.55244994	1.532974239	0.862370491	0.047520325	0	0.054085242
1424	Control Spring	Spring	Control	38	3078.06347	0	0	0	0	3.07806347	0	-87.18	30.33088966	6.12920749	11.83827496	23.65864992	3.57463928	0.3321694	0	804.904145	0.1556096	9.411202669	20.57167482	25.56870031	3.281995179	8.733399864	1.910050394	0.873523995	0.048127824	0	0.215116409
1425	Control Spring	Spring	Control	39	1999.43879	0	0	0	0	1.99943879	0	-87.17	30.3309037	6.91522677	11.97346656	23.64579964	2.02560596	0.33561205	0	1026.019936	0.17883003	8.337527514	19.48314953	25.76394987	1.422300744	7.509682969	2.118150231	0.876849741	0.048184751	0	0.072144137
1426	Control Spring	Spring	Control	40	0	0	0	0	0	0	0	-87.16	30.33091691	7.67180014	12.01420021	23.59729958	0.7428154	0.2150032	0	1097.212413	0.17724484	8.331276894	19.50570043	25.73913383	0.659476754	7.491500219	2.141834255	0.864992996	0.047250699	0	0.011751851
1427	Control Spring	Spring	Control	41	0	0	0	0	0	0	0	-87.15	30.3309293	7.34845245	28.01647615	24.68462467	0.99236248	0.22970282	0	581.1805586	0.3104739	8.893589973	19.97730064	25.66150093	1.545137523	-8.039175506	0.976876261	0.858491004	0.046599202	0	0.092985452
1428	Control Spring	Spring	Control	42	0	0	0	0	0	0	0	-87.14	30.33094086	6.80815983	33.36355019	25.07899952	2.28427263	0.47515495	0	114.7802189	0.42436563	14.00979996	23.05335045	23.8352499	7.201640127	-10.3102	-1.243749619	0.504483998	0.022965601	0	0.001142753
1429	Control Spring	Spring	Control	43	195.22698	0	0	0	0	0.19522698	0	-87.32	30.33965581	5.80906498	14.98570228	25.95774984	0.44852883	0.10753664	0	163.361177	0.11944818	11.26383495	13.90721059	23.59502506	5.454769973	-1.078491692	-2.362724777	0.646213993	0.04986385	0	0.118650026
1430	Control Spring	Spring	Control	44	2743.27526	0	0	0	0	2.74327526	0	-87.31	30.33968062	7.38313997	30.6144247	24.8697505	3.66996508	0.46407997	0	1067.612772	0.25462212	23.62750006	34.5642004	23.12247467	16.24436009	3.949775701	-1.74727583	0.554834753	0.026412925	0	0.10332054
1431	Control Spring	Spring	Control	45	4895.54599	0	0	0	0	4.89554599	0	-87.3	30.3397046	7.56772995	19.34457493	25.35632515	6.23085308	0.49154949	0	249.7708161	0.30319196	23.79257536	34.70594978	23.07747507	16.22484541	15.36137485	-2.278850079	0.602282256	0.02966975	0	0.352511345
1432	Control Spring	Spring	Control	46	3016.96643	0	0	0	0	3.01696643	0	-87.29	30.33972775	7.2507174	15.1862998	25.80819988	6.53758218	0.378319	27.10168375	67.22332168	0.19720649	23.89785004	34.77862549	23.03604984	16.64713264	19.59232569	-2.772150037	0.664677739	0.033968675	0	0.319083185
1433	Control Spring	Spring	Control	47	3244.3828	0	0	0	0	3.2443828	0	-87.28	30.33975008	6.62134993	16.5493002	25.56577492	7.07560739	0.39751873	37.63778616	0	0.24766935	23.82364988	34.66542435	23.02009964	17.20229995	18.11612415	-2.54567528	0.721837506	0.03792925	0	0.103761083
1434	Control Spring	Spring	Control	48	2970.54108	0	0	0	0	2.97054108	0	-87.27	30.33977158	5.98914015	14.84337521	24.39967537	9.83423942	0.22498336	0	0	0.30259019	23.54405022	34.35375023	23.04087496	17.55491007	19.51037502	-1.358800412	0.761897013	0.040721825	0	0.025784025
1435	Control Spring	Spring	Control	49	1040.18513	0	0	0	0	1.04018513	0	-87.25	30.33979225	5.29470741	11.42045021	23.58830023	10.49299903	0.032992	472.8413156	765.7855903	0.01367211	23.07832575	33.87132549	23.10645008	17.78361834	22.45087528	-0.481850149	0.779692516	0.041952125	0	0.000944112
1436	Control Spring	Spring	Control	50	3889.27545	0	0	0	0	3.88927545	0	-87.24	30.33981209	4.7834475	9.65837503	23.12067509	10.02752198	0.07195906	1404.712572	1765.773588	0.02661621	22.43669987	33.22342491	23.22402525	17.65325237	23.56504988	0.103350159	0.792294756	0.042821825	0	4.20E-06
[truncated: 874 more rows]
